# Supplementary material
Source: PubMed Central journal article supplement (PMC6773469)

GPCR gene symbol: *ADCYAP1R1*

GPCR name: PAC1

Tested ligand: PACAP27

### C-terminal chimera co-expression

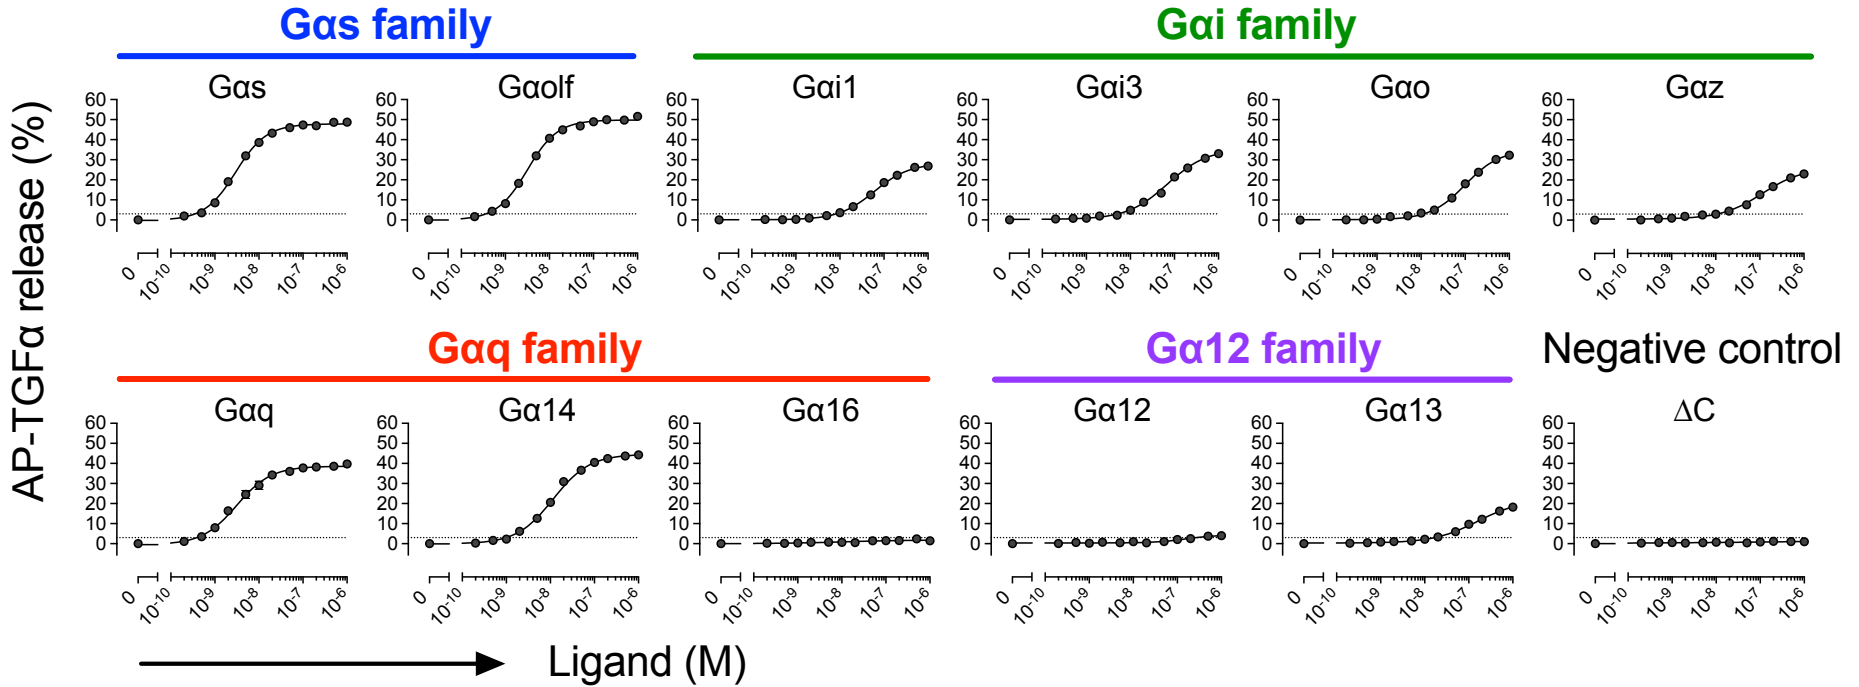

$E_{max}$  (%AP-TGF $\alpha$  release)    ● <3%    ● 3-5%    ● 5-10%    ● >10%

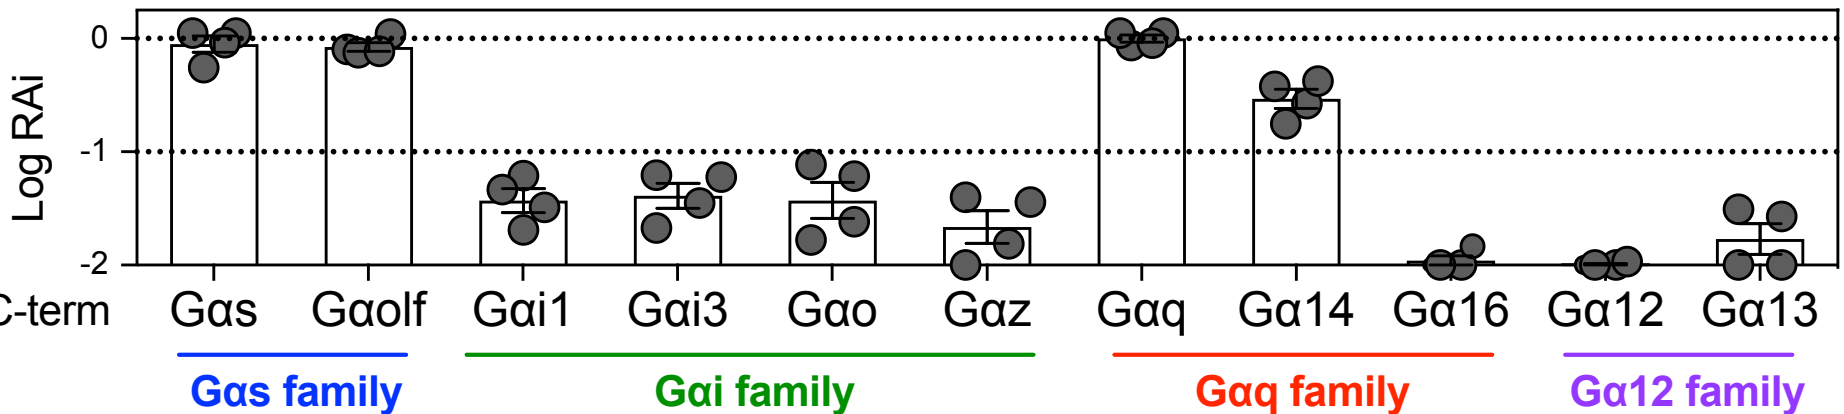

GPCR gene symbol: *ADORA1*

GPCR name: A1

Tested ligand: Adenosine

### C-terminal chimera co-expression

#### Gas family

#### Gai family

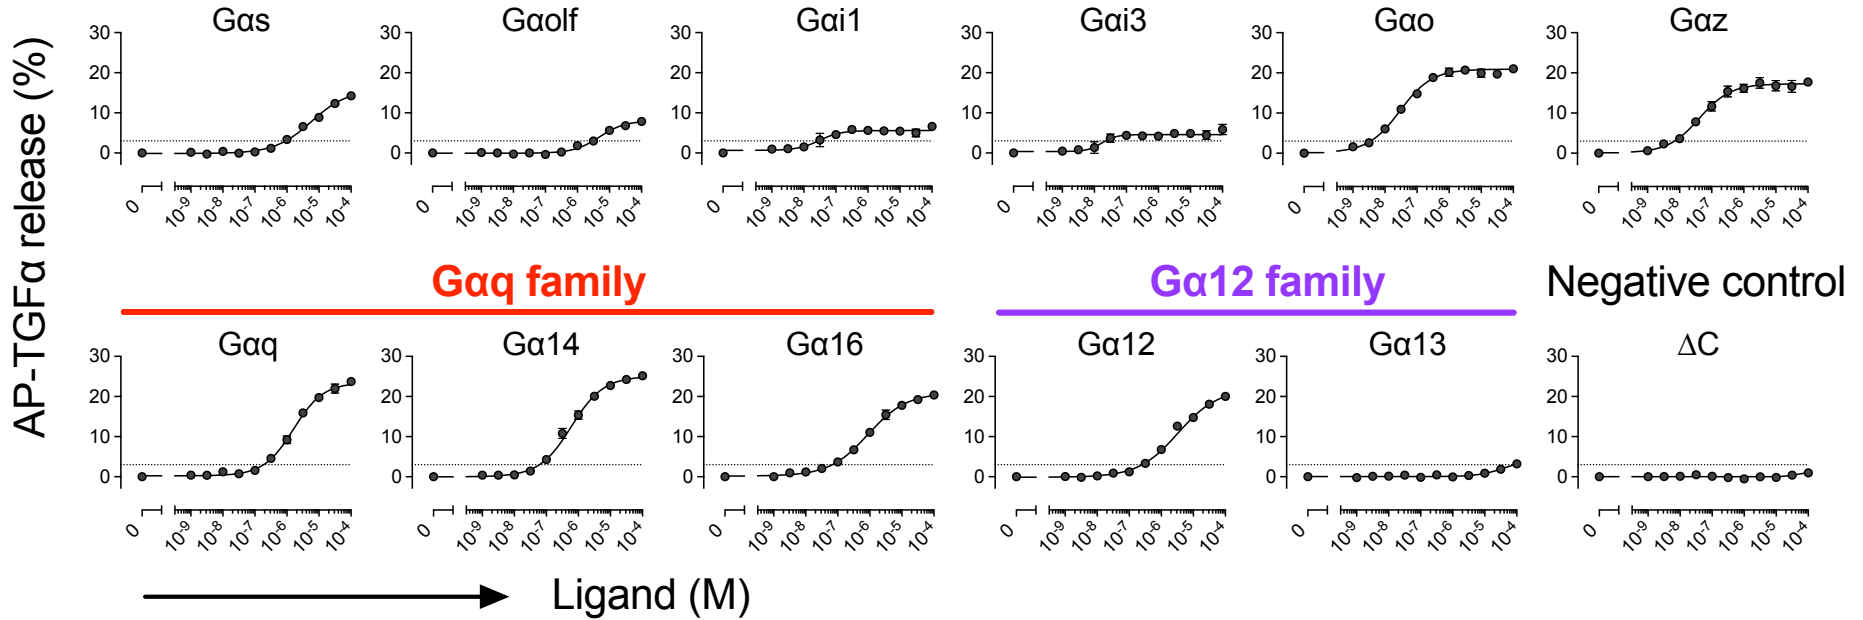

$E_{max}$  (%AP-TGFα release)    ● <3%    ● 3-5%    ● 5-10%    ● >10%

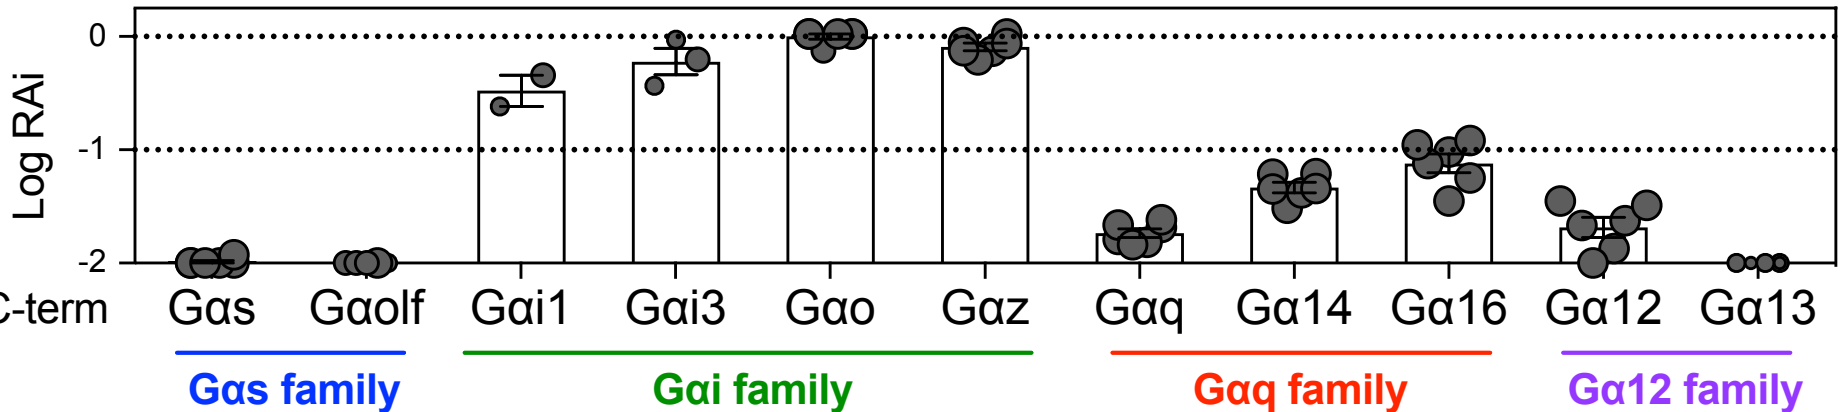

GPCR gene symbol: *ADORA2A*

GPCR name: A2A

Tested ligand: Adenosine

### C-terminal chimera co-expression

#### Gas family

#### Gai family

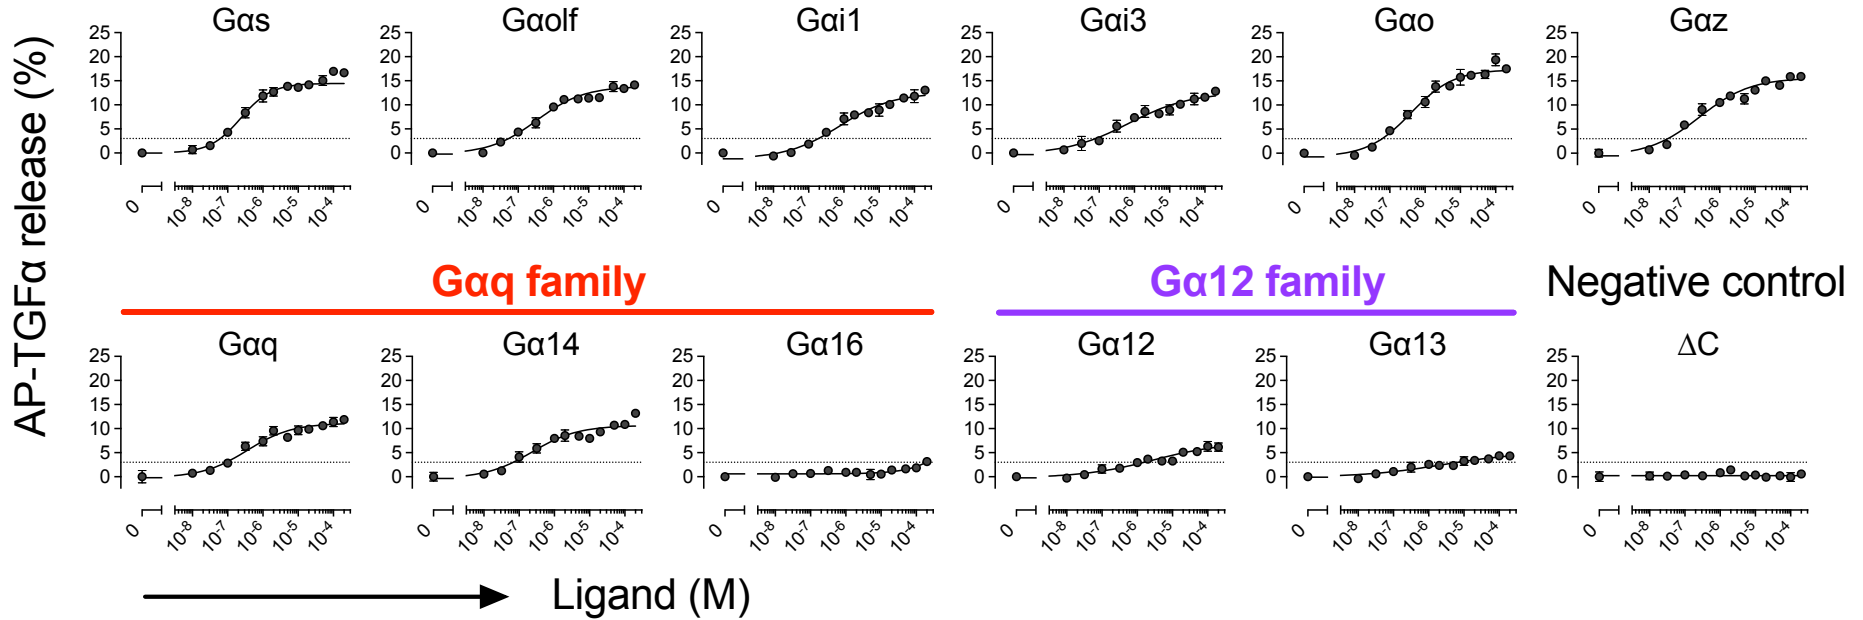

$E_{max}$  (%AP-TGFα release)

● <3%   ● 3-5%   ● 5-10%   ● >10%

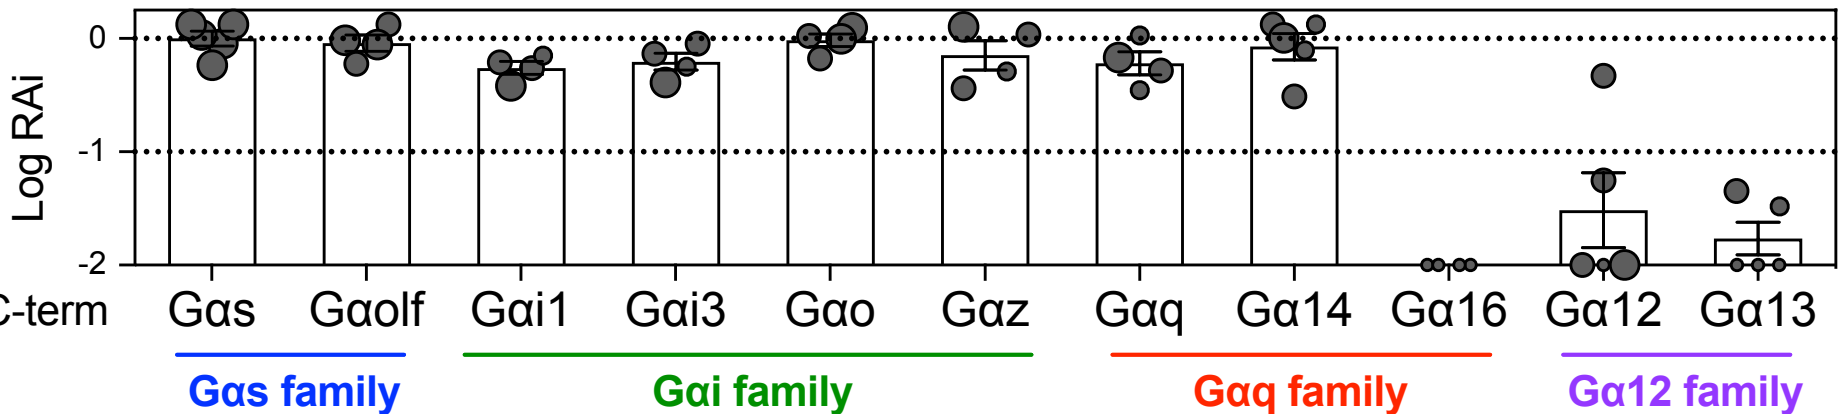

GPCR gene symbol: *ADORA2B*

GPCR name: A2B

Tested ligand: Adenosine

### C-terminal chimera co-expression

#### Gas family

#### Gai family

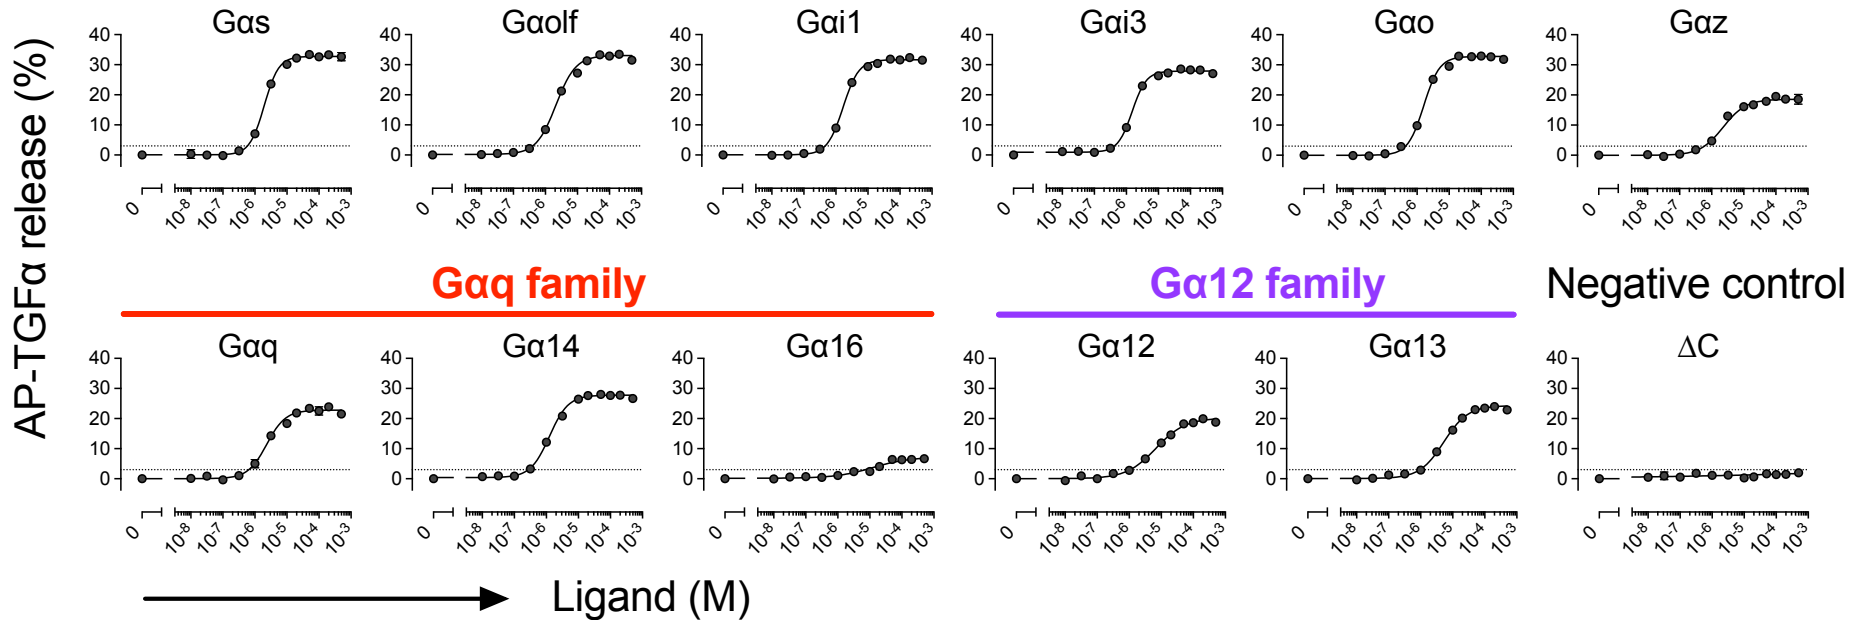

$E_{max}$  (%AP-TGFα release)

● <3%   ● 3-5%   ● 5-10%   ● >10%

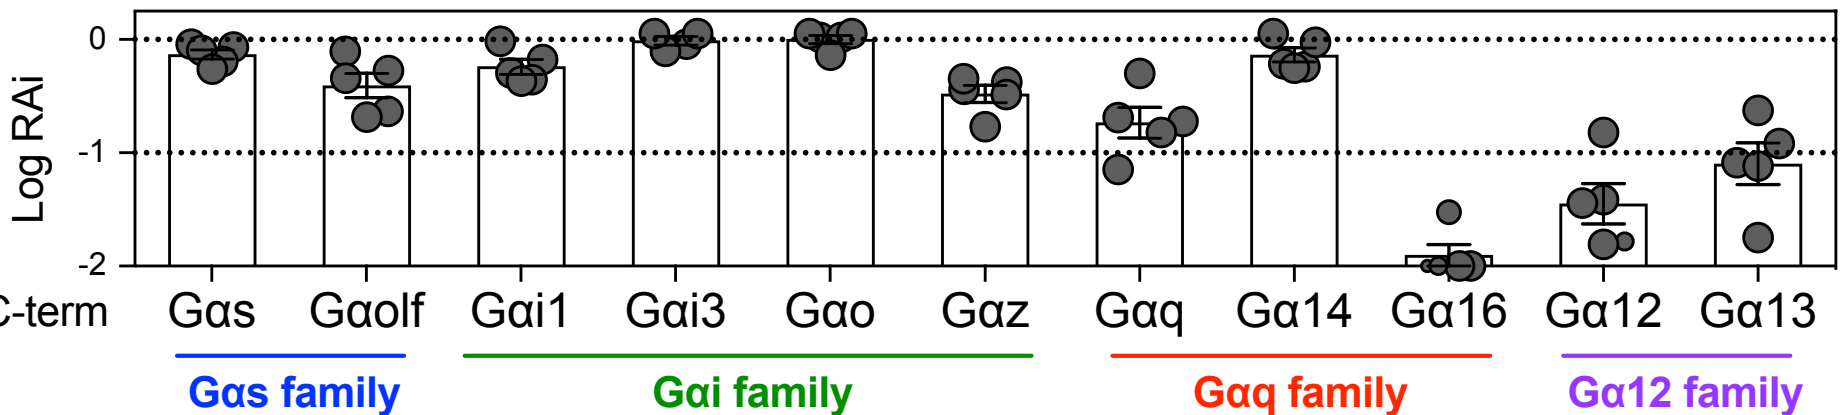

GPCR gene symbol: *ADORA3*

GPCR name: A3

Tested ligand: Adenosine

### C-terminal chimera co-expression

#### Gas family

#### Gai family

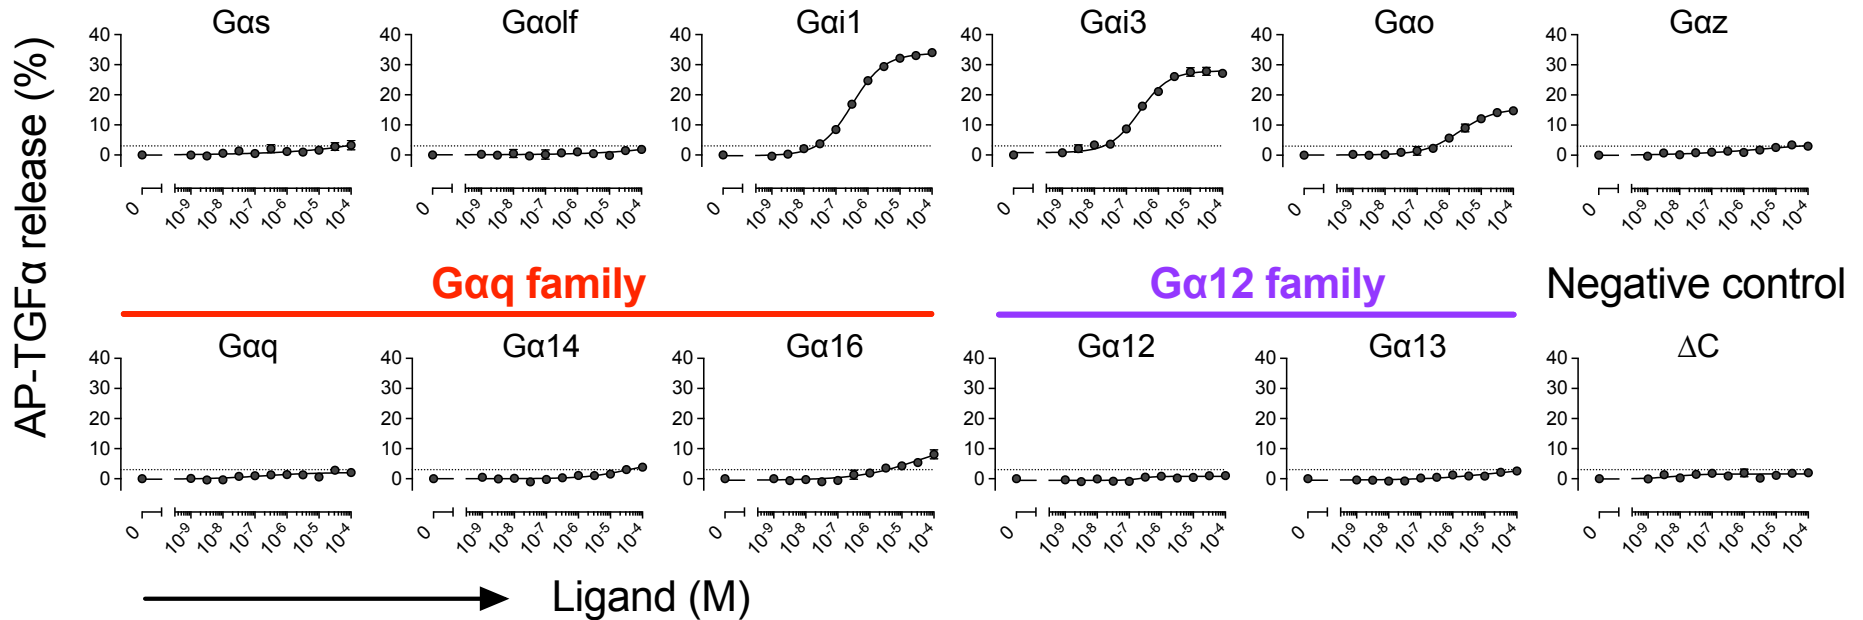

$E_{max}$  (%AP-TGFα release)    ● <3%    ● 3-5%    ● 5-10%    ● >10%

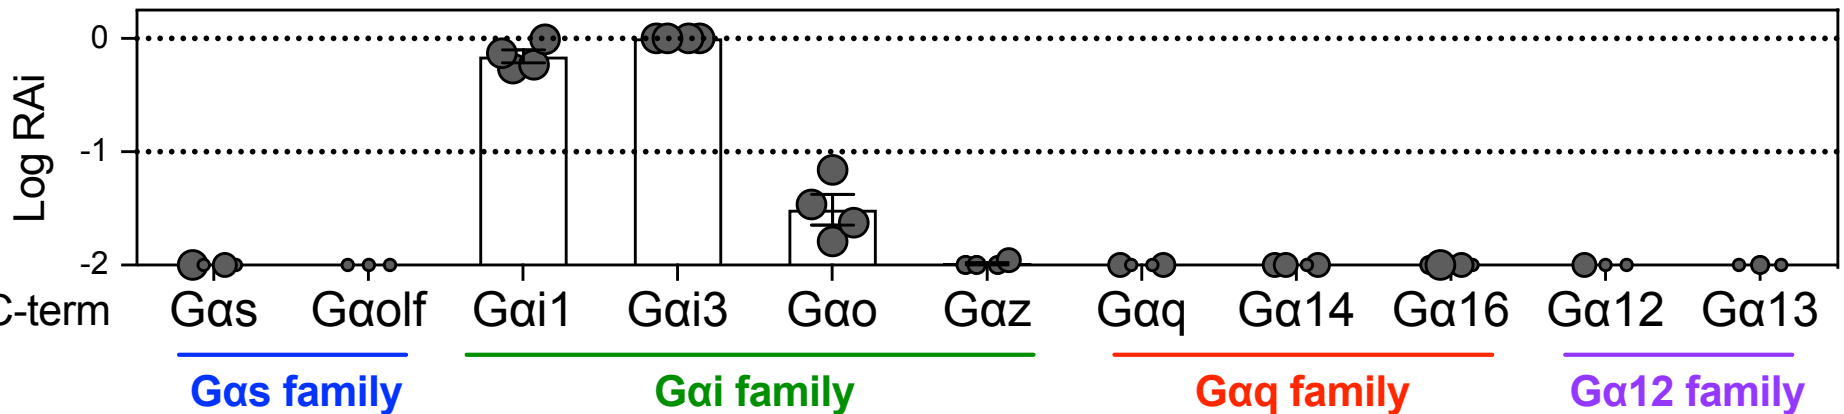

GPCR gene symbol: *ADRA1A*

GPCR name:  $\alpha 1A$

Tested ligand: Noradrenaline

### C-terminal chimera co-expression

#### Gas family

#### Gai family

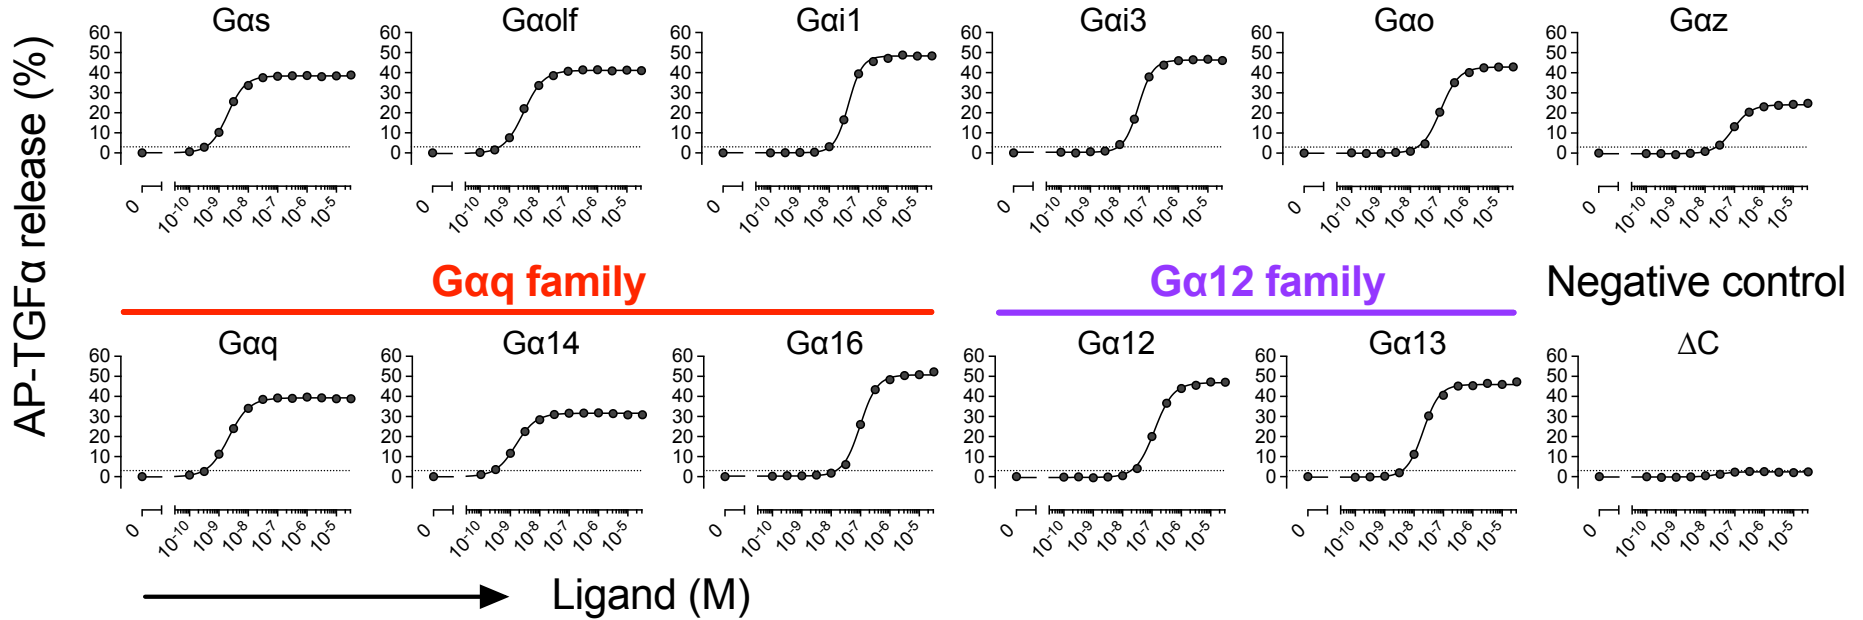

$E_{max}$  (%AP-TGF $\alpha$  release)    ● <3%    ● 3-5%    ● 5-10%    ● >10%

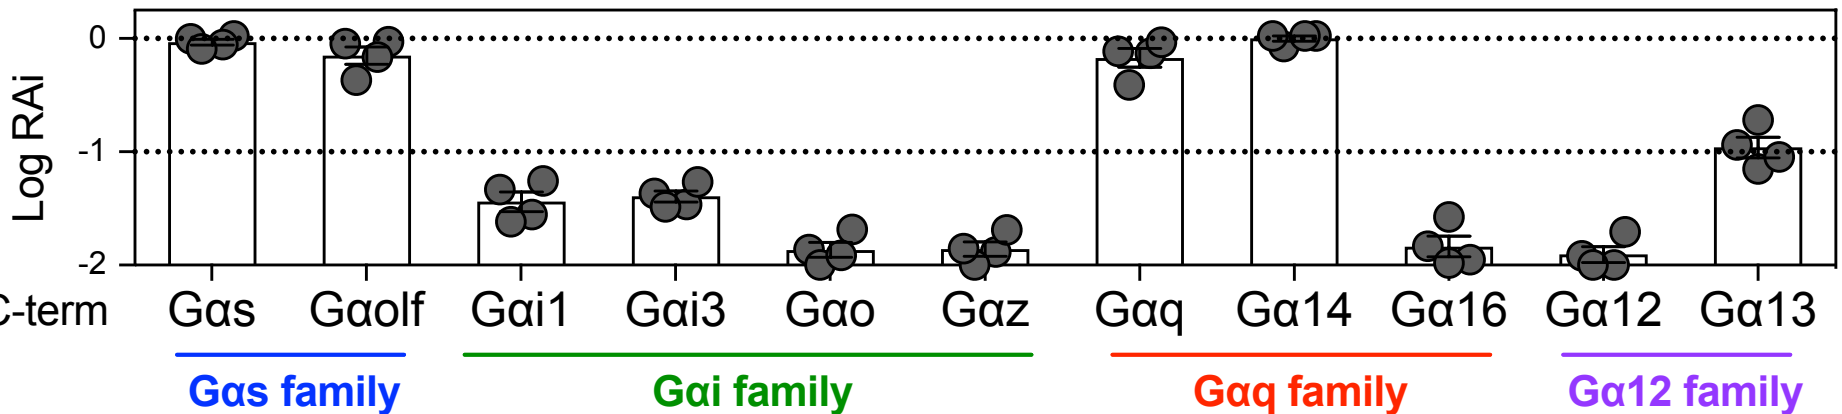

GPCR gene symbol: *ADRA1B*

GPCR name:  $\alpha 1B$

Tested ligand: Noradrenaline

### C-terminal chimera co-expression

#### Gas family

#### Gai family

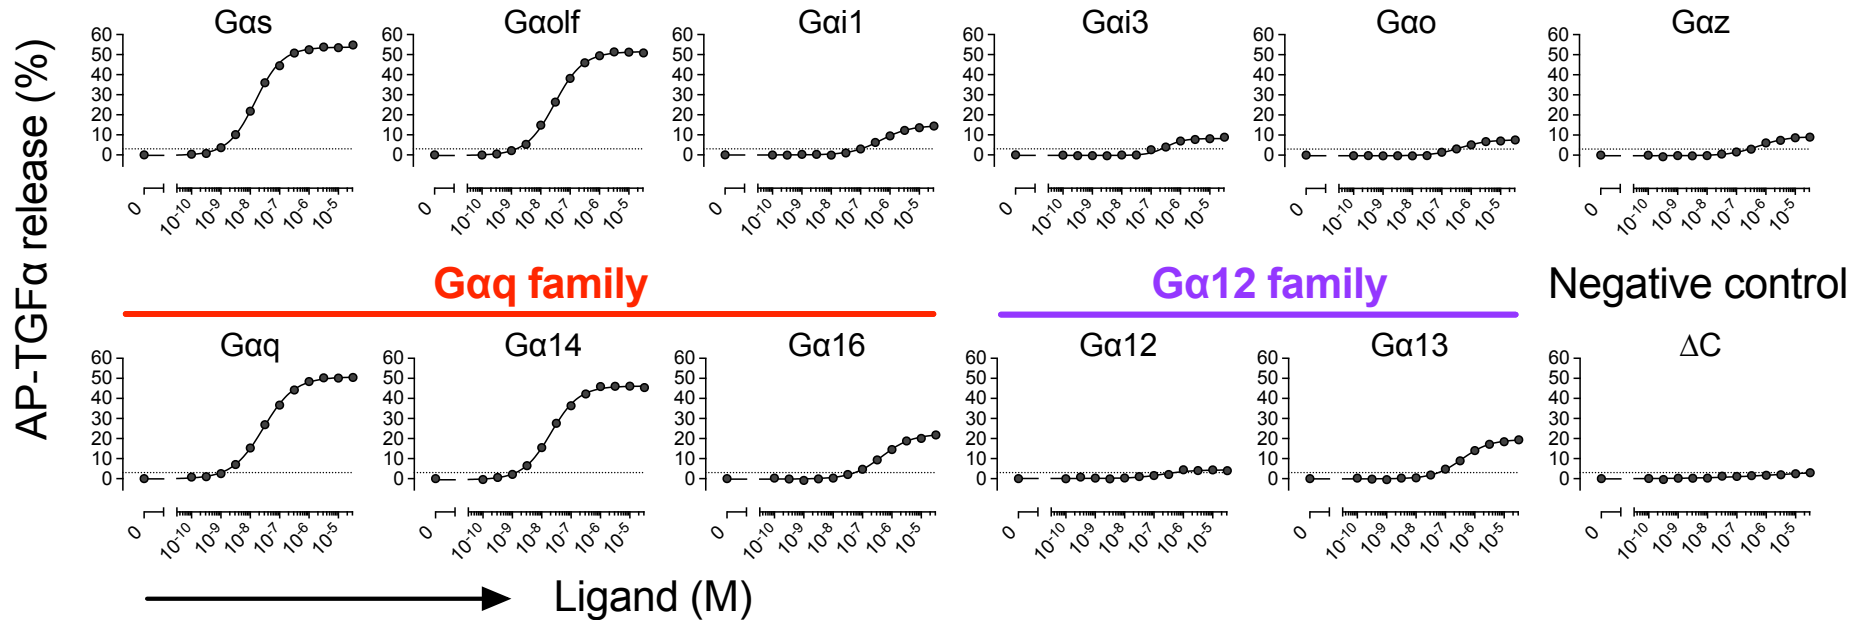

$E_{max}$  (%AP-TGF $\alpha$  release)    ● <3%    ● 3-5%    ● 5-10%    ● >10%

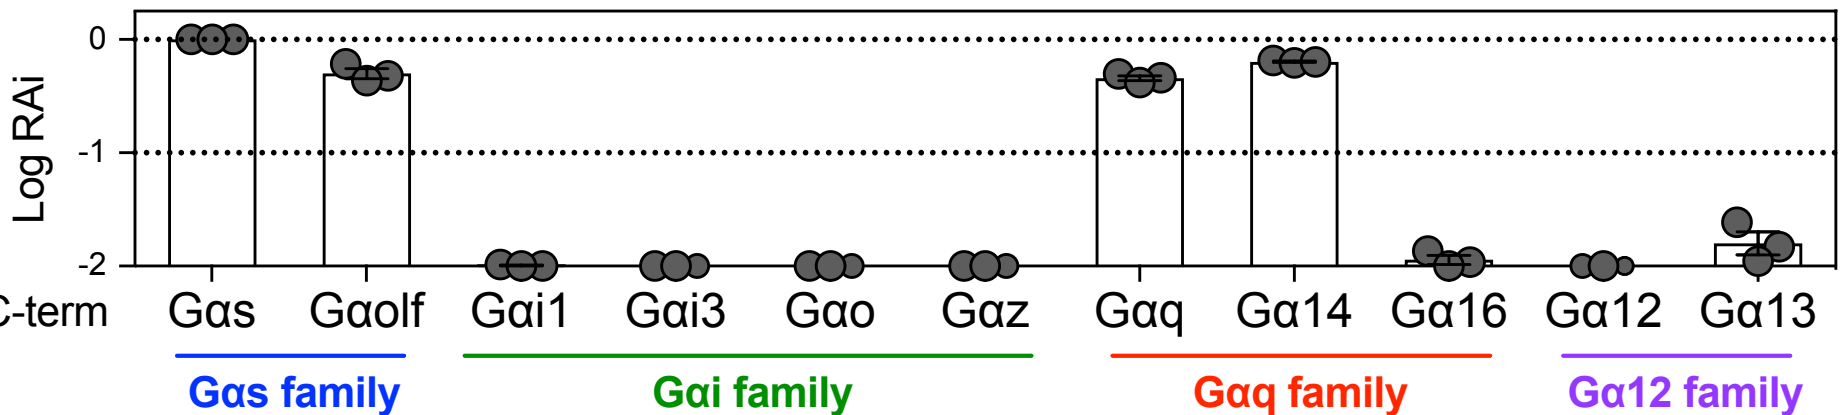

GPCR gene symbol: *ADRA1D*

GPCR name:  $\alpha 1D$

Tested ligand: Noradrenaline

### C-terminal chimera co-expression

#### Gas family

#### Gai family

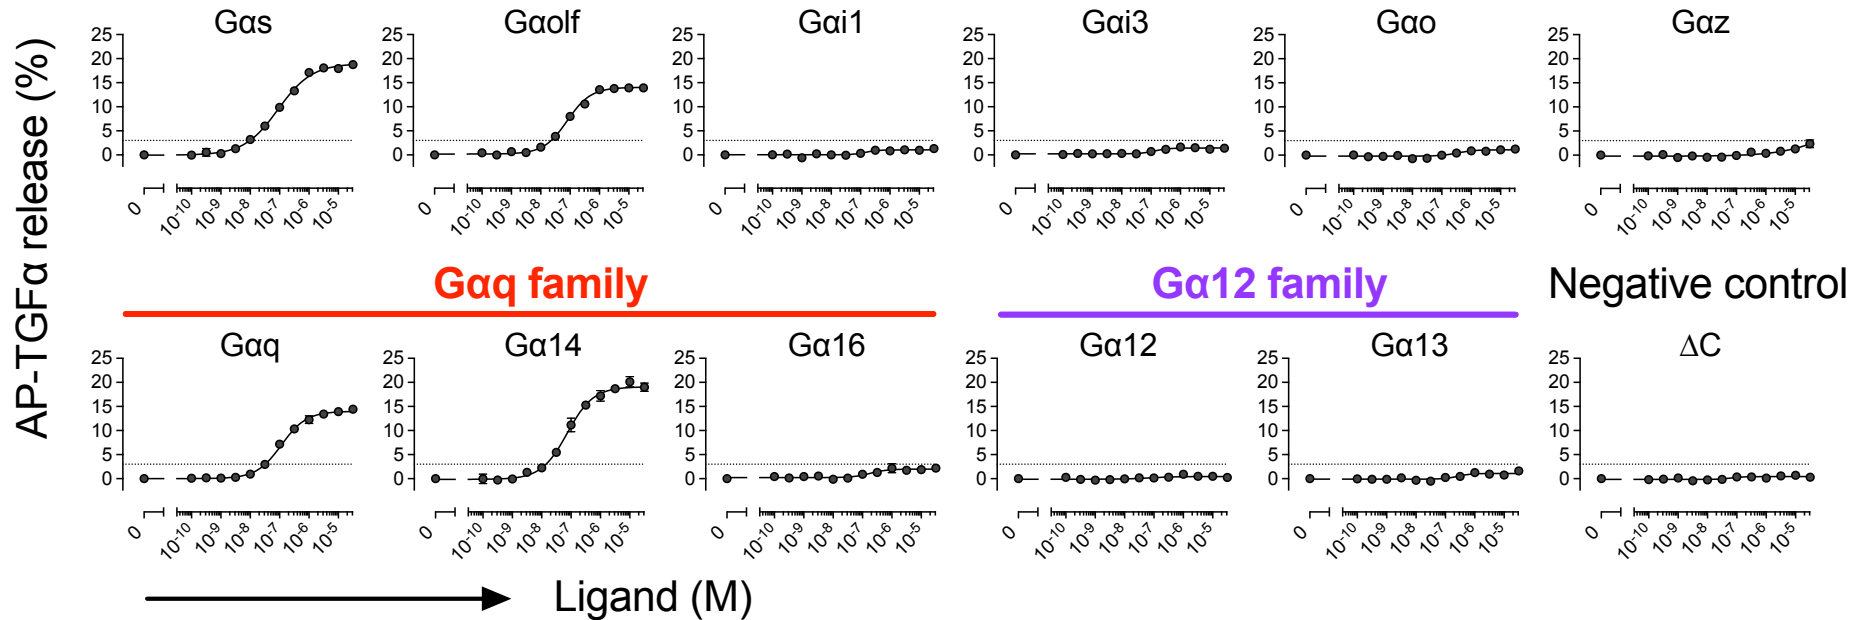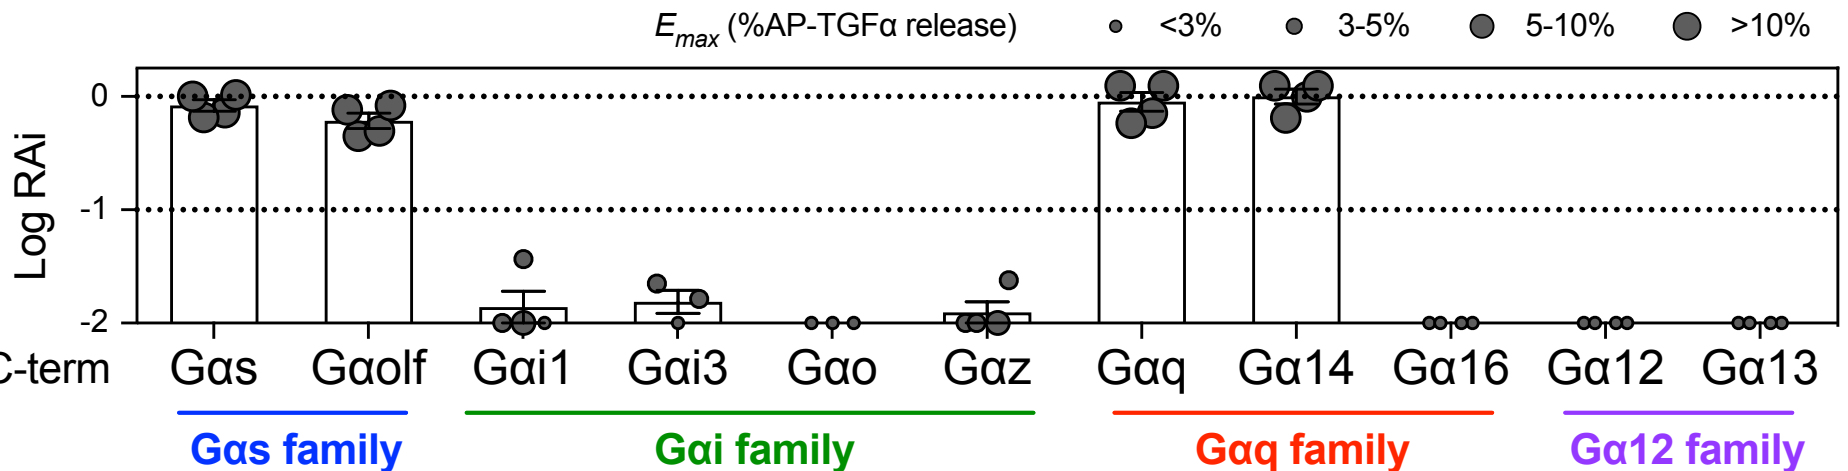



GPCR gene symbol: *ADRA2A*

GPCR name:  $\alpha 2A$

Tested ligand: Noradrenaline

### C-terminal chimera co-expression

#### Gas family

#### Gai family

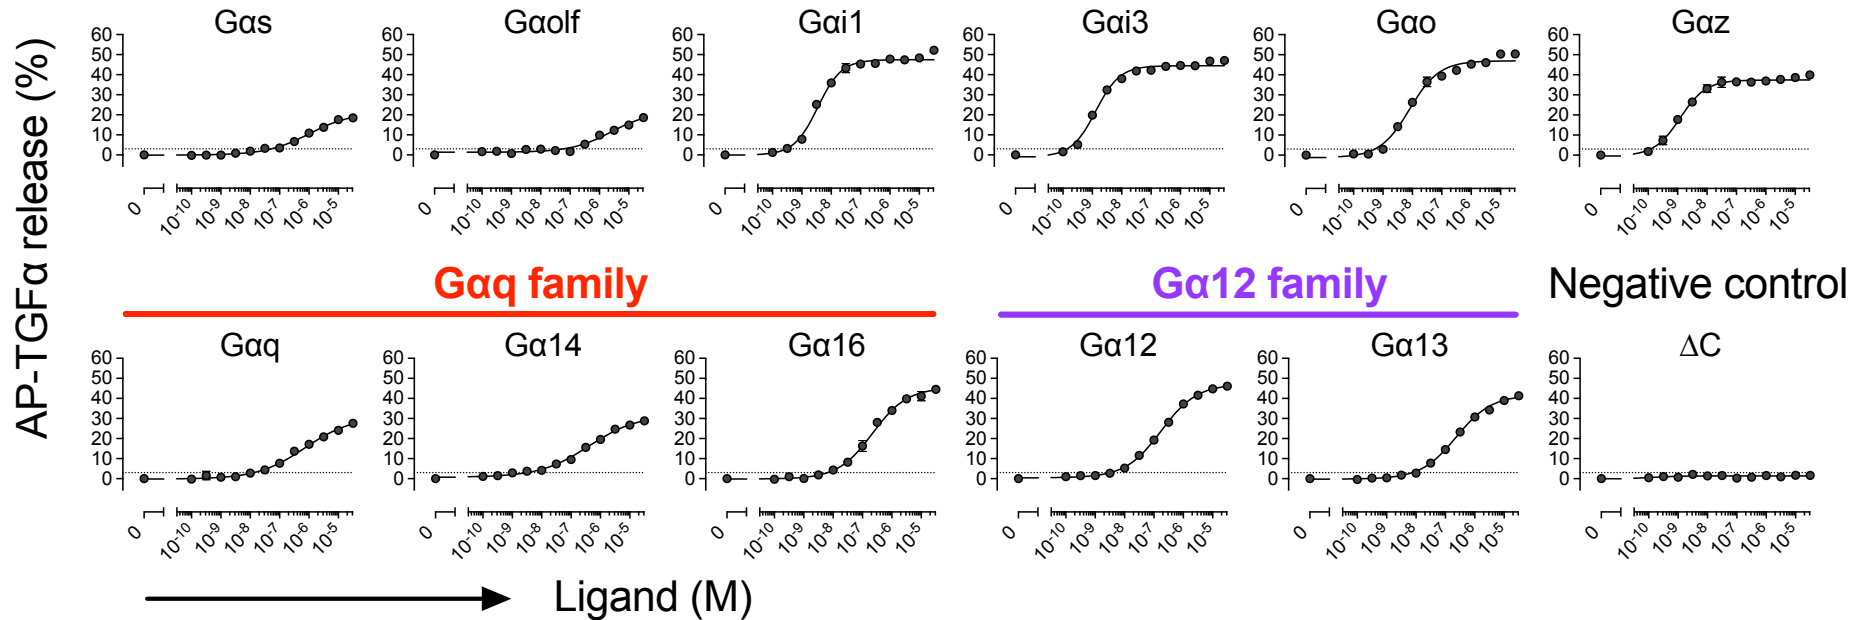

$E_{max}$  (%AP-TGF $\alpha$  release)

● <3%   ● 3-5%   ● 5-10%   ● >10%

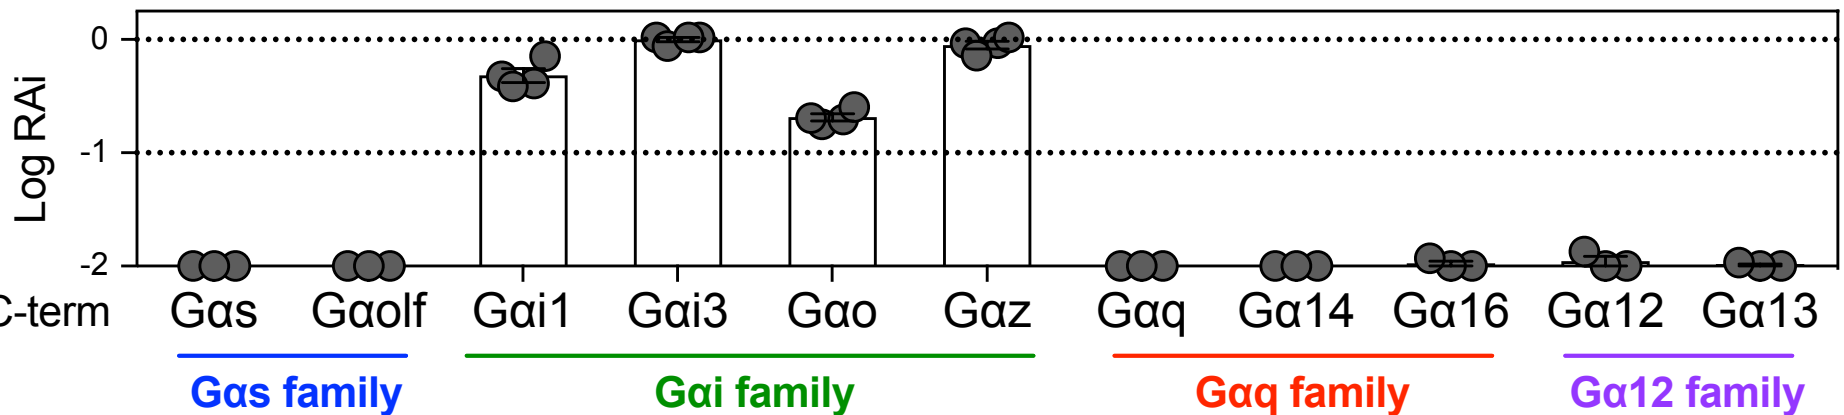

GPCR gene symbol: *ADRA2B*

GPCR name:  $\alpha 2B$

Tested ligand: Noradrenaline

### C-terminal chimera co-expression

#### Gas family

#### Gai family

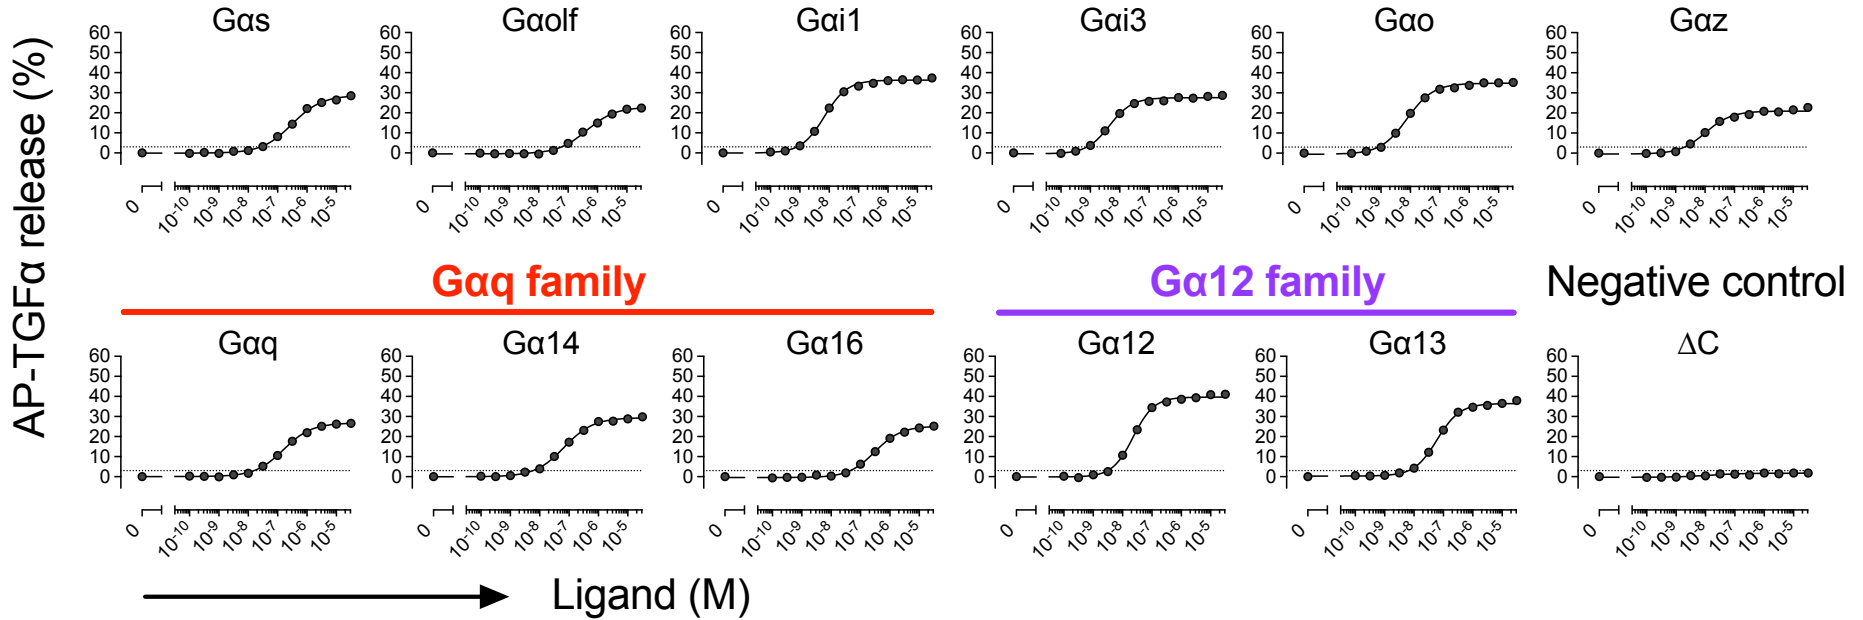

$E_{max}$  (%AP-TGF $\alpha$  release)

● <3%   ● 3-5%   ● 5-10%   ● >10%

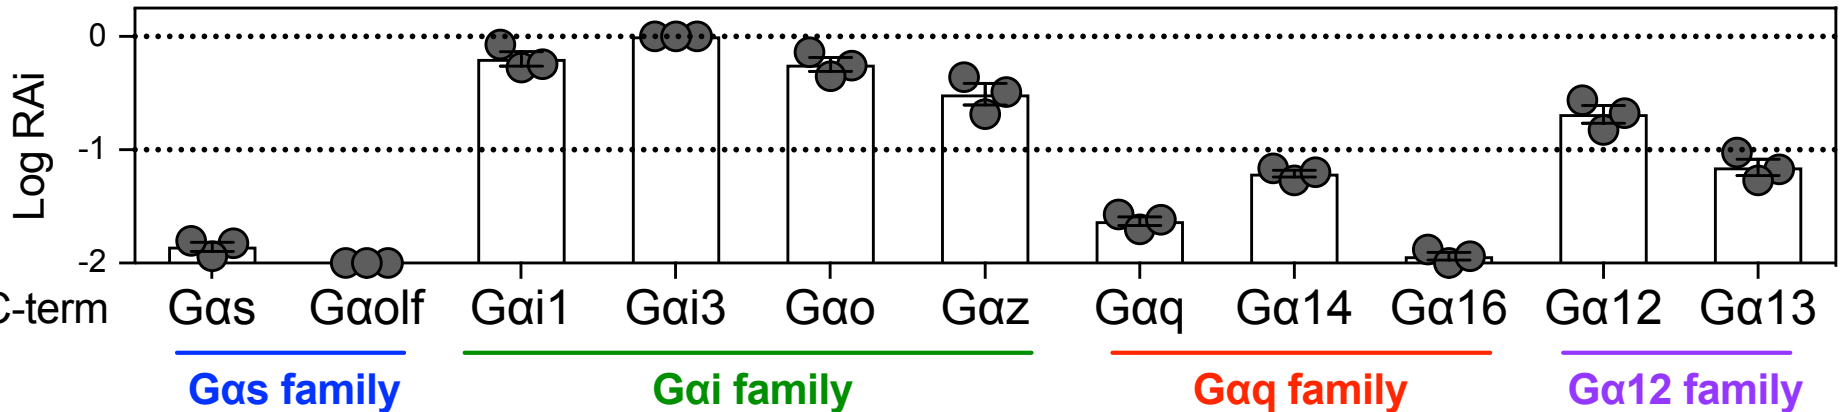

GPCR gene symbol: *ADRA2C*

GPCR name:  $\alpha 2C$

Tested ligand: Noradrenaline

### C-terminal chimera co-expression

#### Gas family

#### Gai family

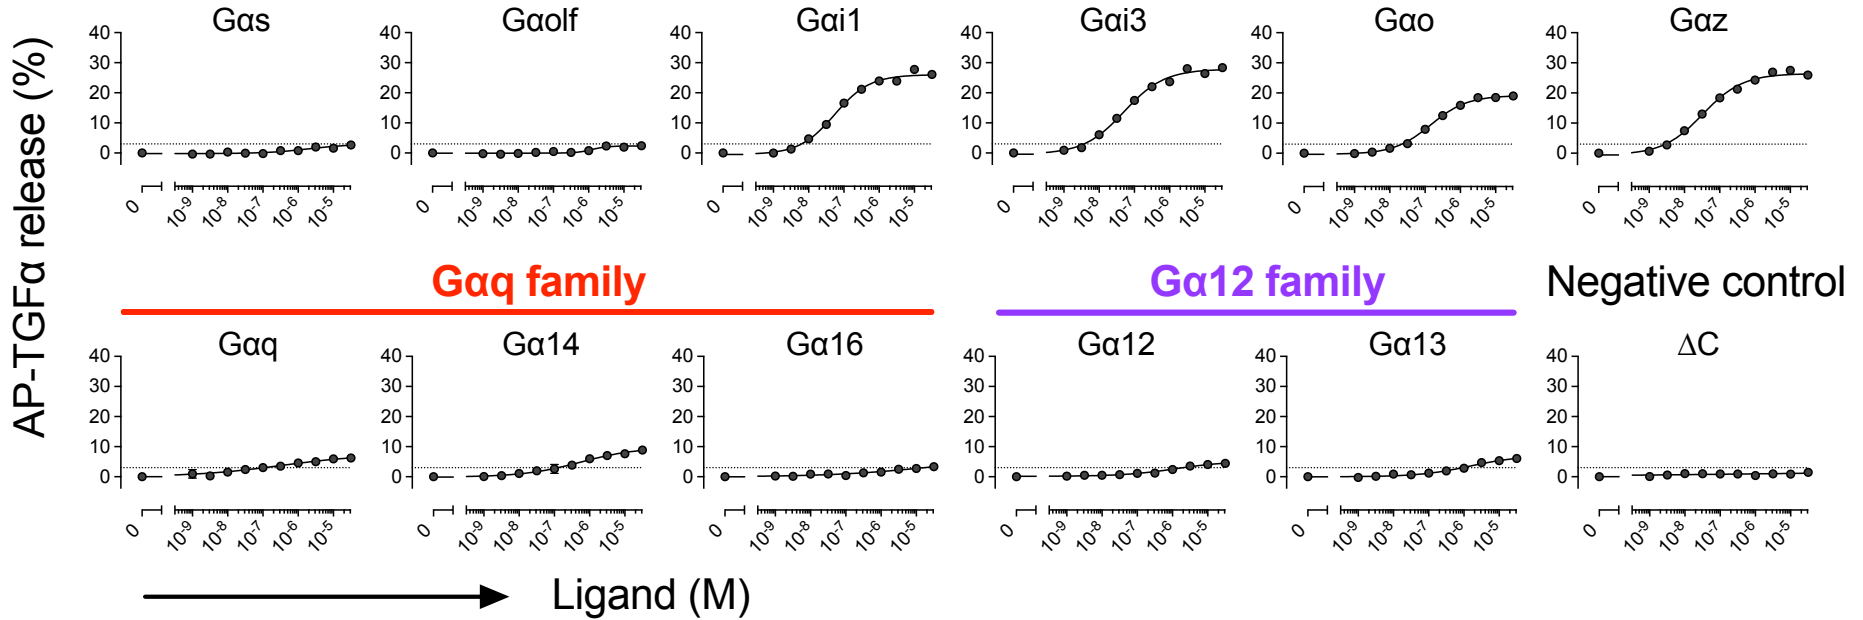

$E_{max}$  (%AP-TGF $\alpha$  release)    ● <3%    ● 3-5%    ● 5-10%    ● >10%

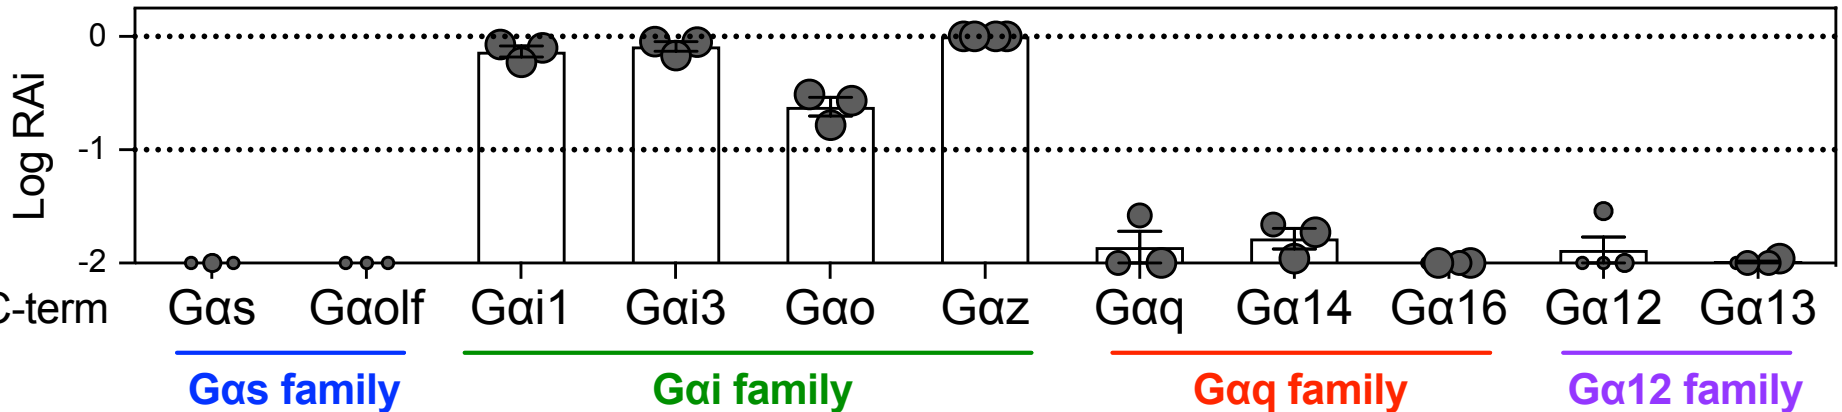

GPCR gene symbol: *ADRB1*

GPCR name:  $\beta 1$

Tested ligand: Isoproterenol

### C-terminal chimera co-expression

#### Gas family

#### Gai family

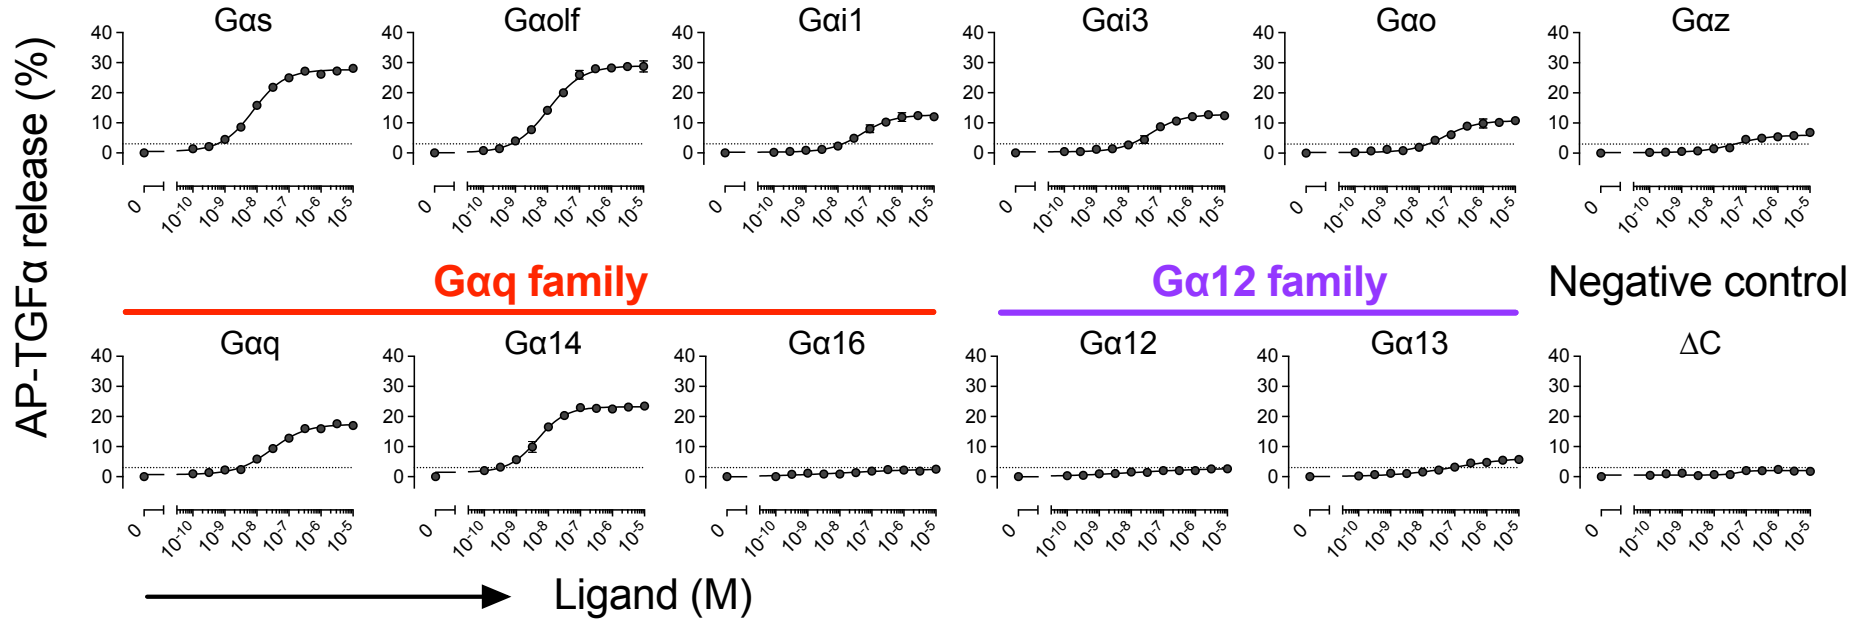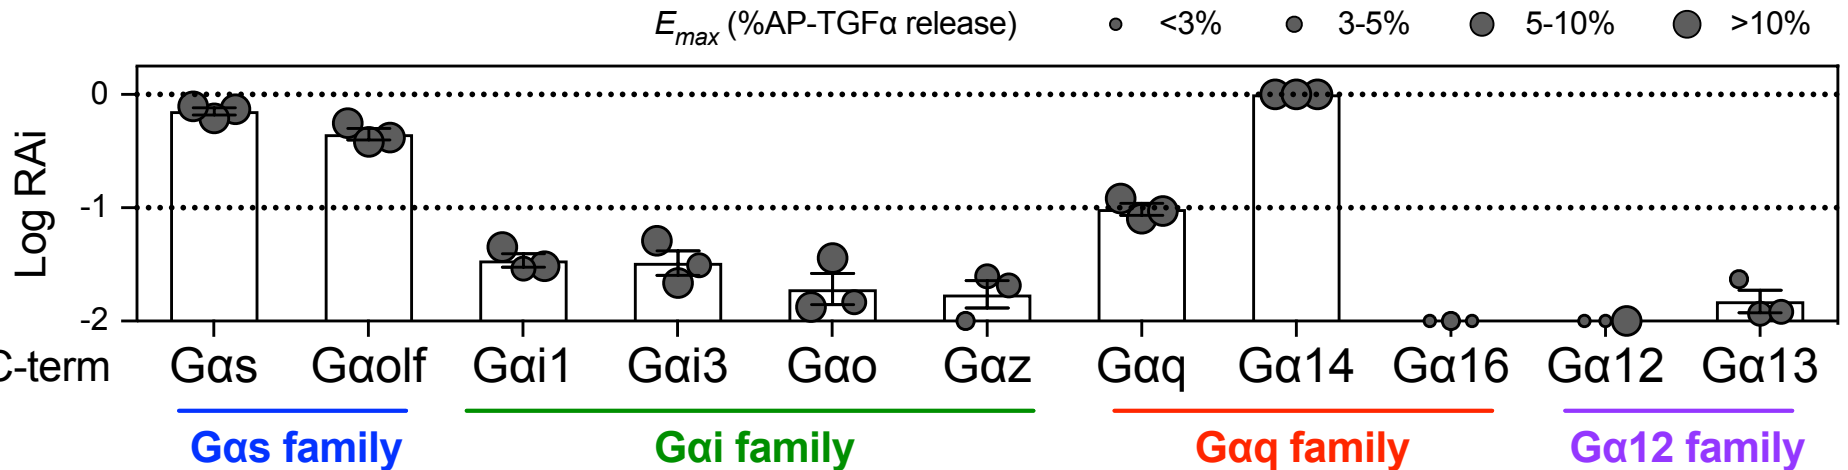

GPCR gene symbol: *ADRB2*

GPCR name:  $\beta 2$

Tested ligand: Isoproterenol

### C-terminal chimera co-expression

#### Gas family

#### Gai family

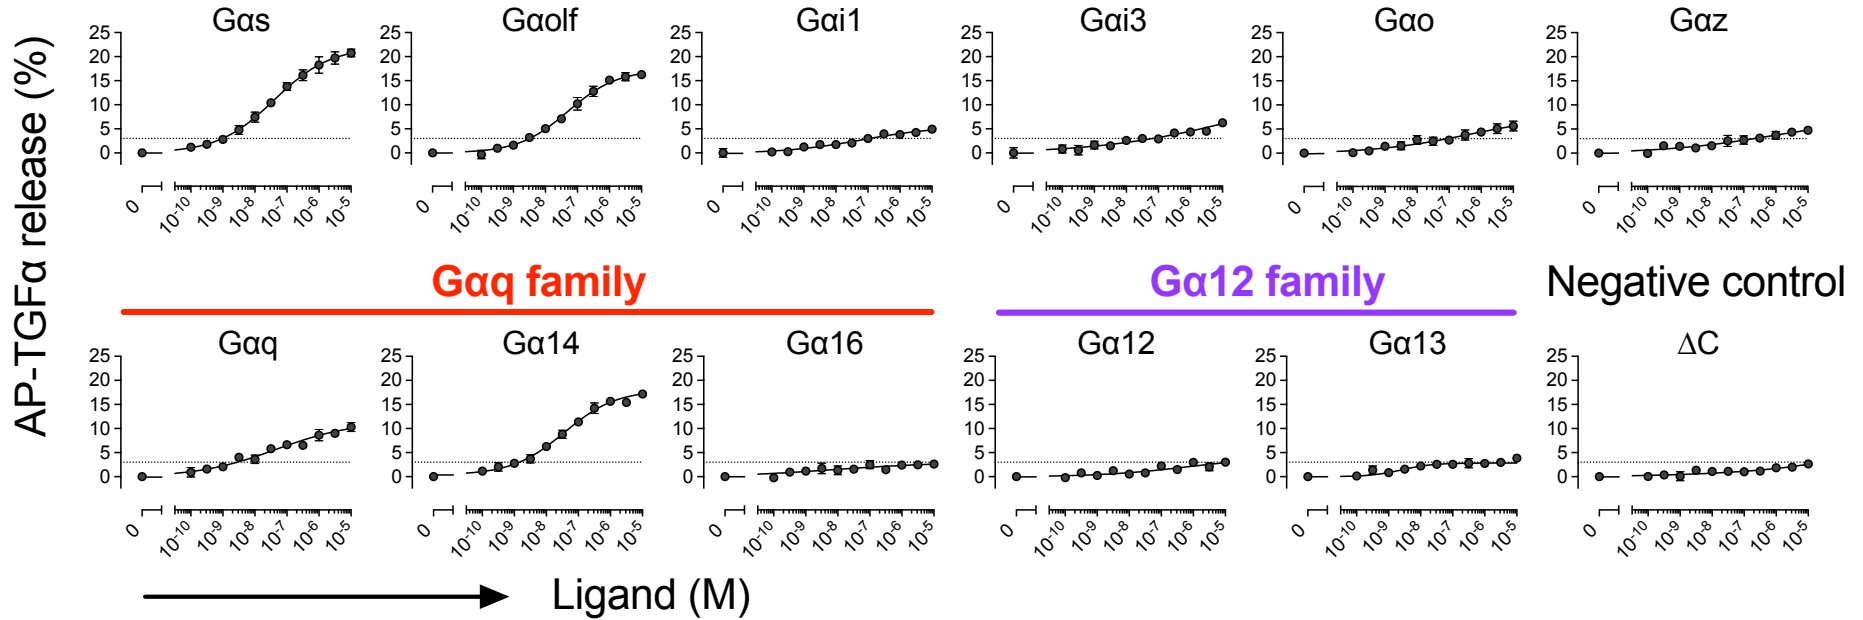

$E_{max}$  (%AP-TGF $\alpha$  release)    ● <3%    ● 3-5%    ● 5-10%    ● >10%

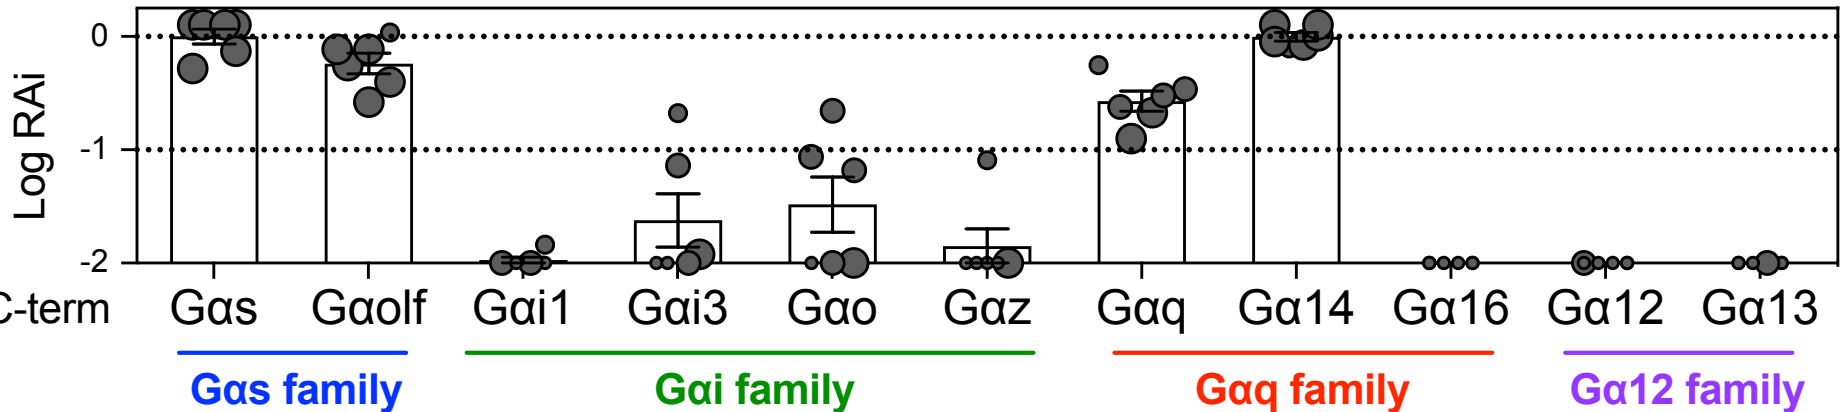

GPCR gene symbol: *ADRB3*

GPCR name:  $\beta 3$

Tested ligand: Isoproterenol

### C-terminal chimera co-expression

#### Gas family

#### Gai family

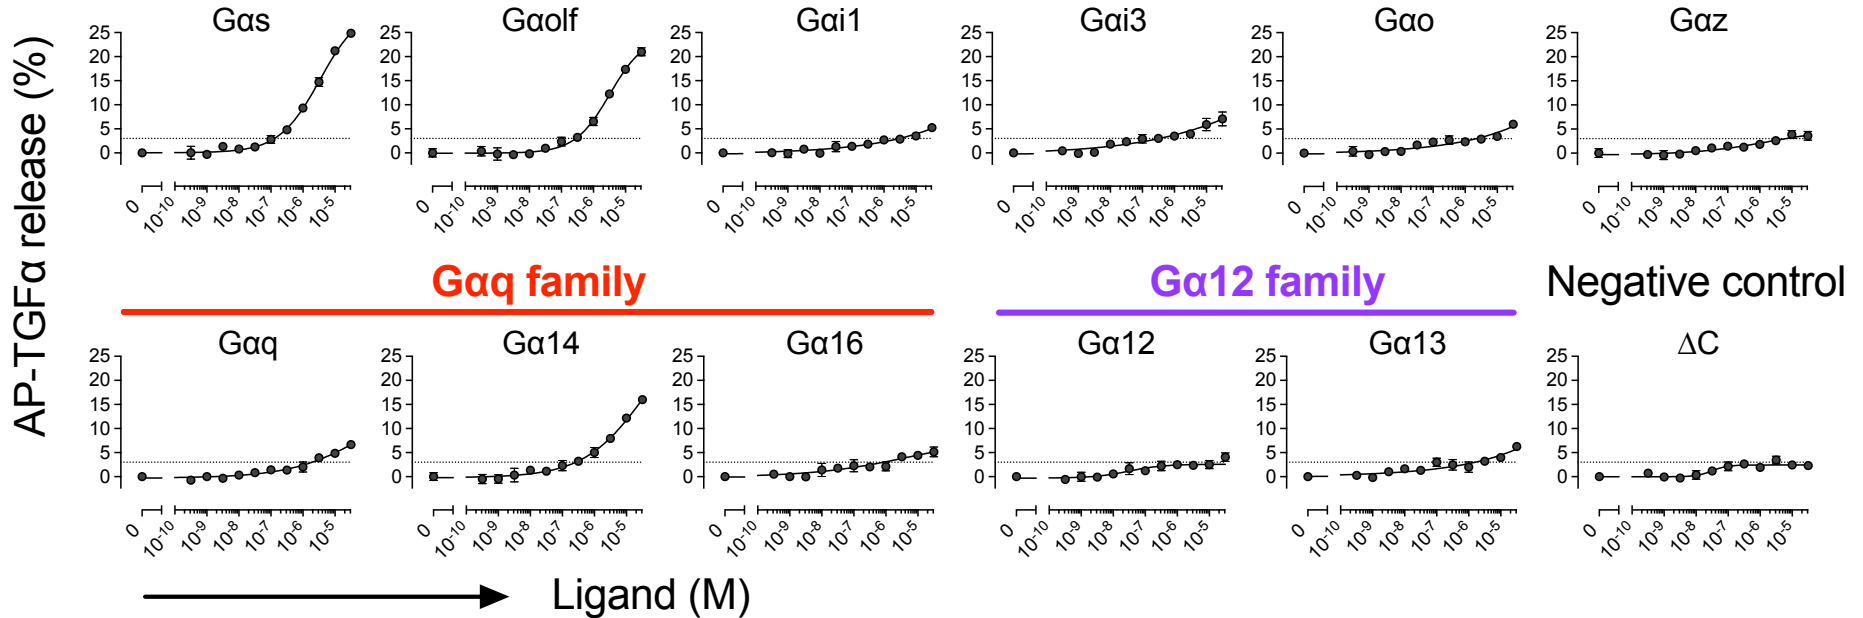

$E_{max}$  (%AP-TGF $\alpha$  release)    ● <3%    ● 3-5%    ● 5-10%    ● >10%

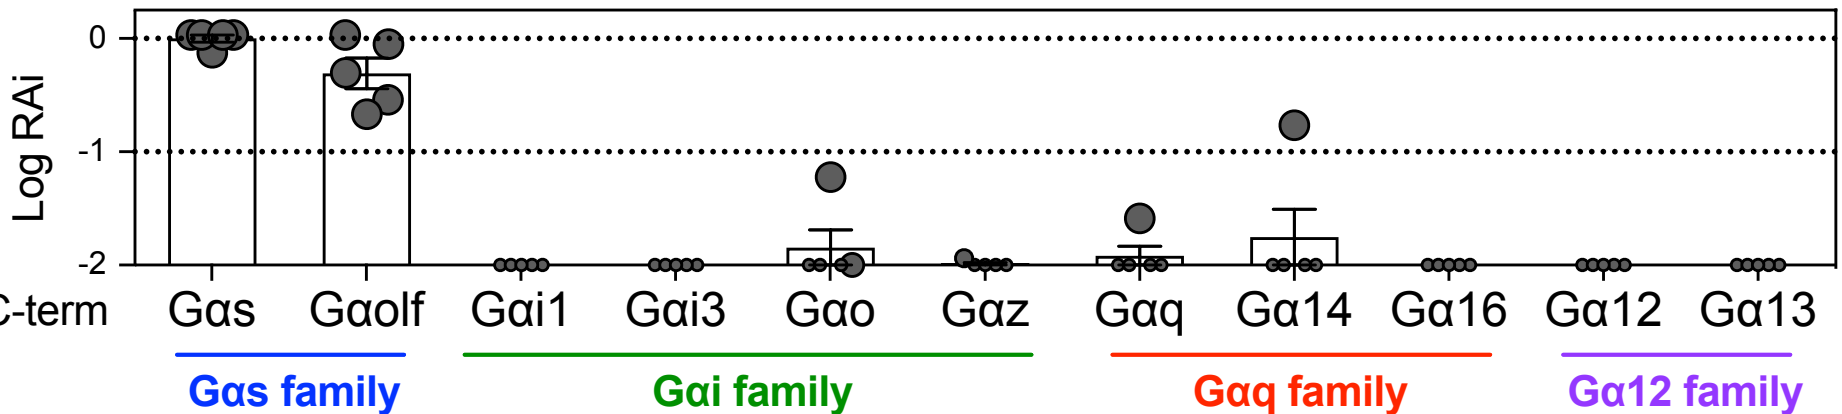

GPCR gene symbol: *AGTR1*

GPCR name: AT1

Tested ligand: Angiotensin II

### C-terminal chimera co-expression

#### Gas family

#### Gai family

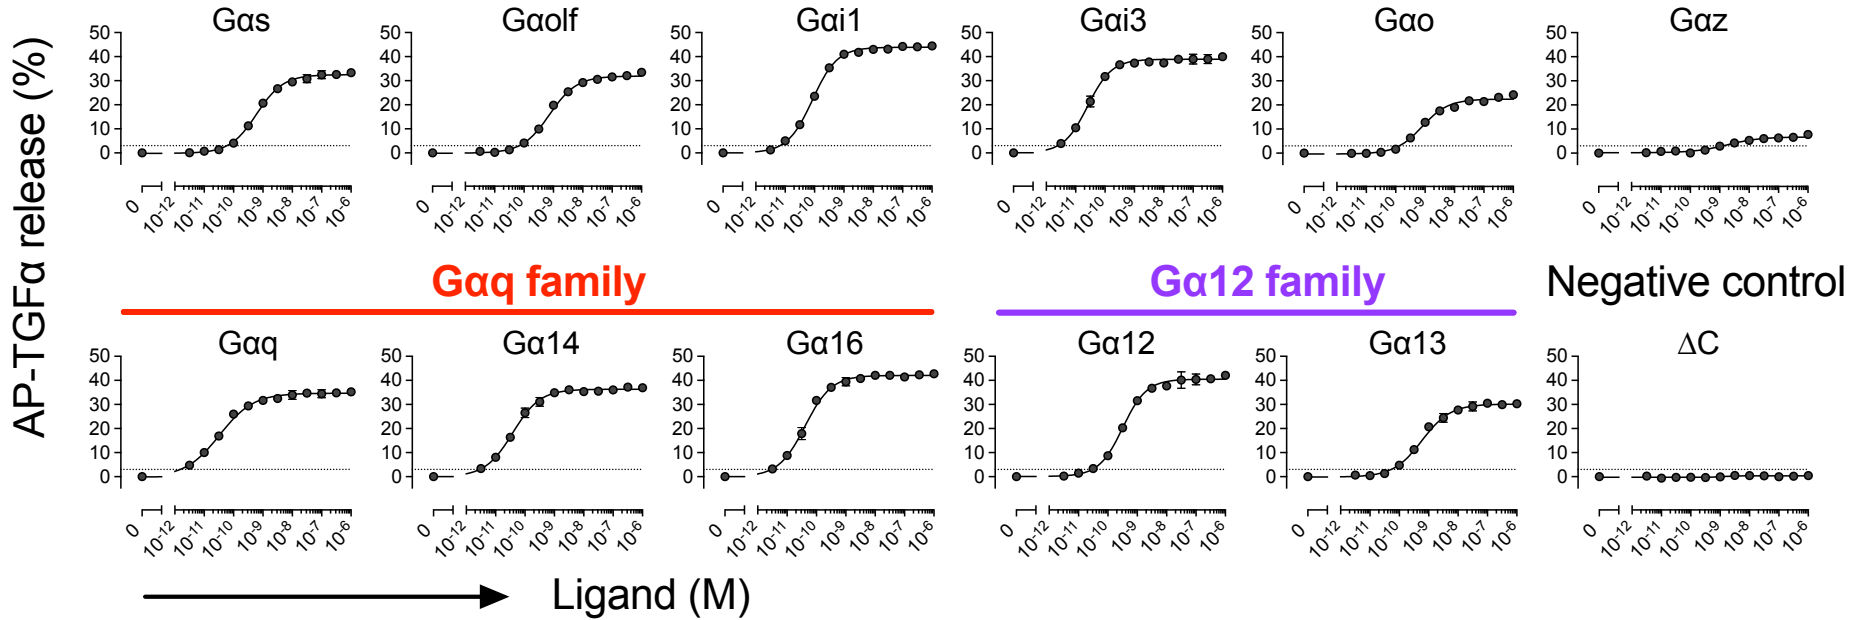

$E_{max}$  (%AP-TGFα release)

● <3%   ● 3-5%   ● 5-10%   ● >10%

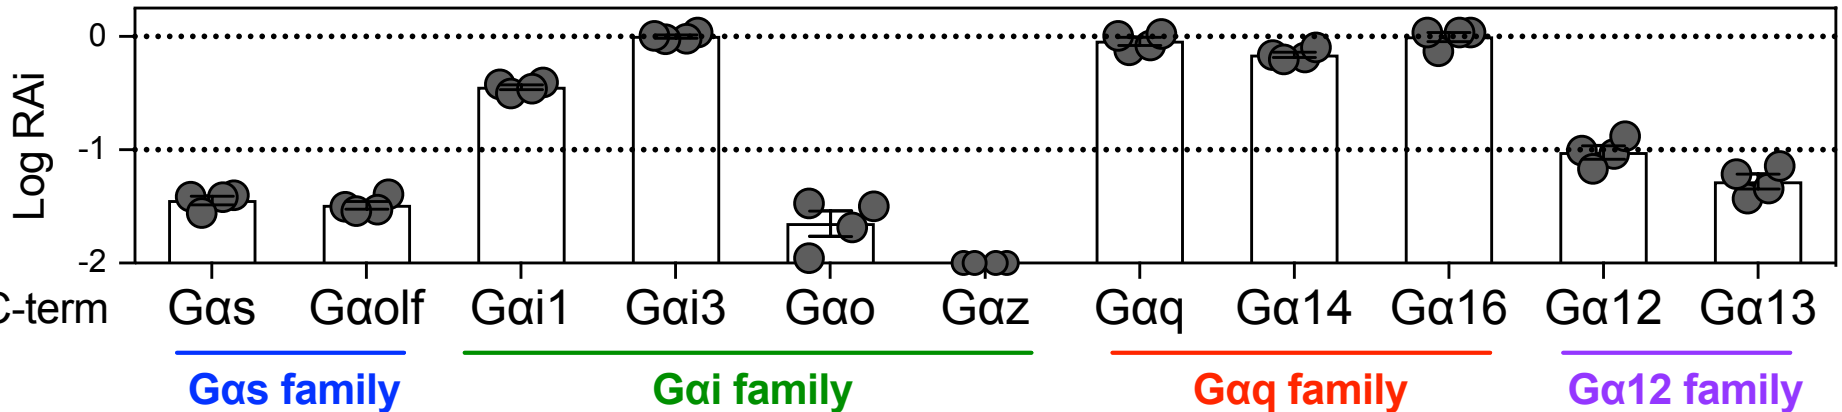

GPCR gene symbol: *APLNR*

GPCR name: APLNR

Tested ligand: Apelin-13

### C-terminal chimera co-expression

#### Gas family

#### Gai family

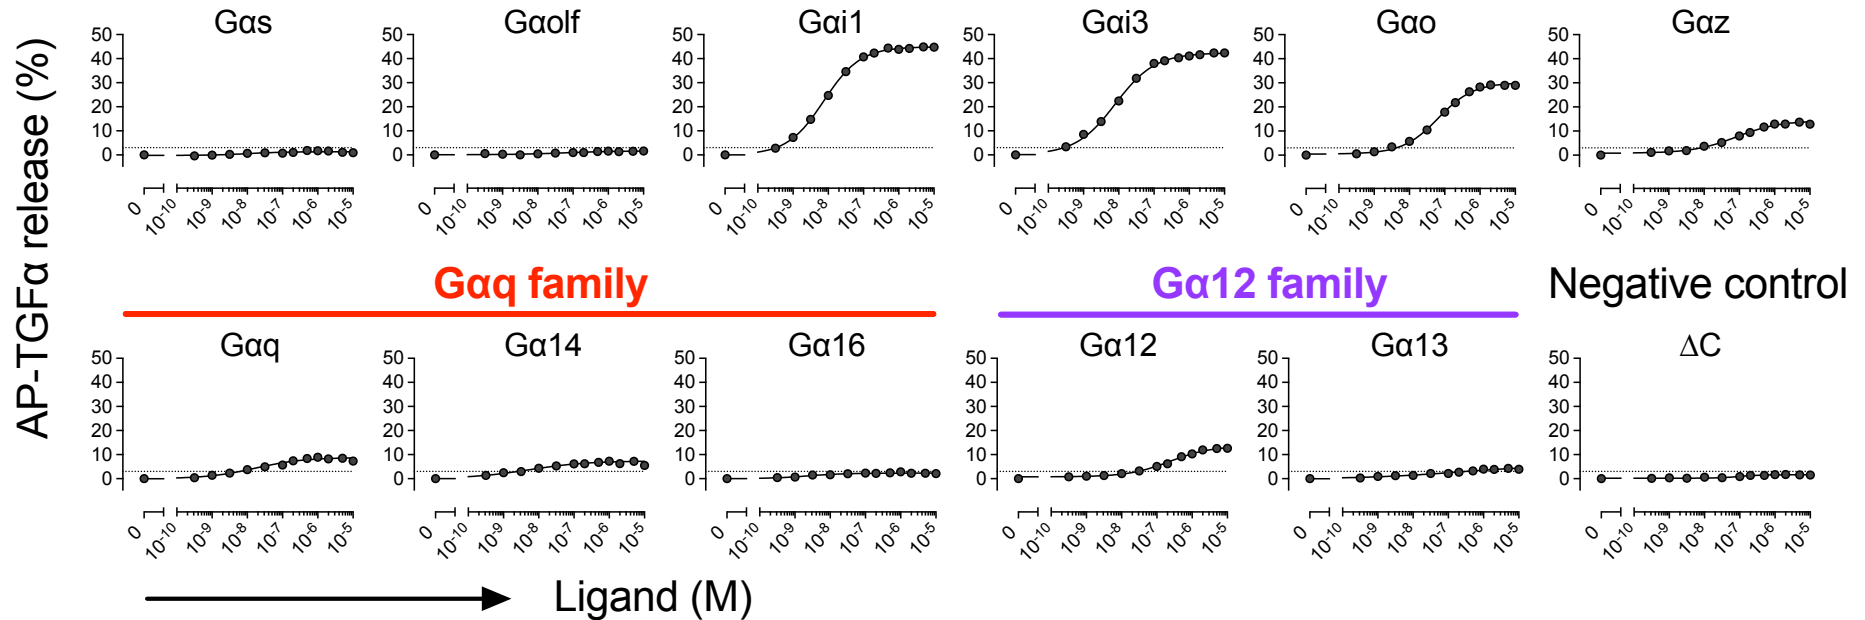

E<sub>max</sub> (%AP-TGFα release)

• <3%    ● 3-5%    ● 5-10%    ● >10%

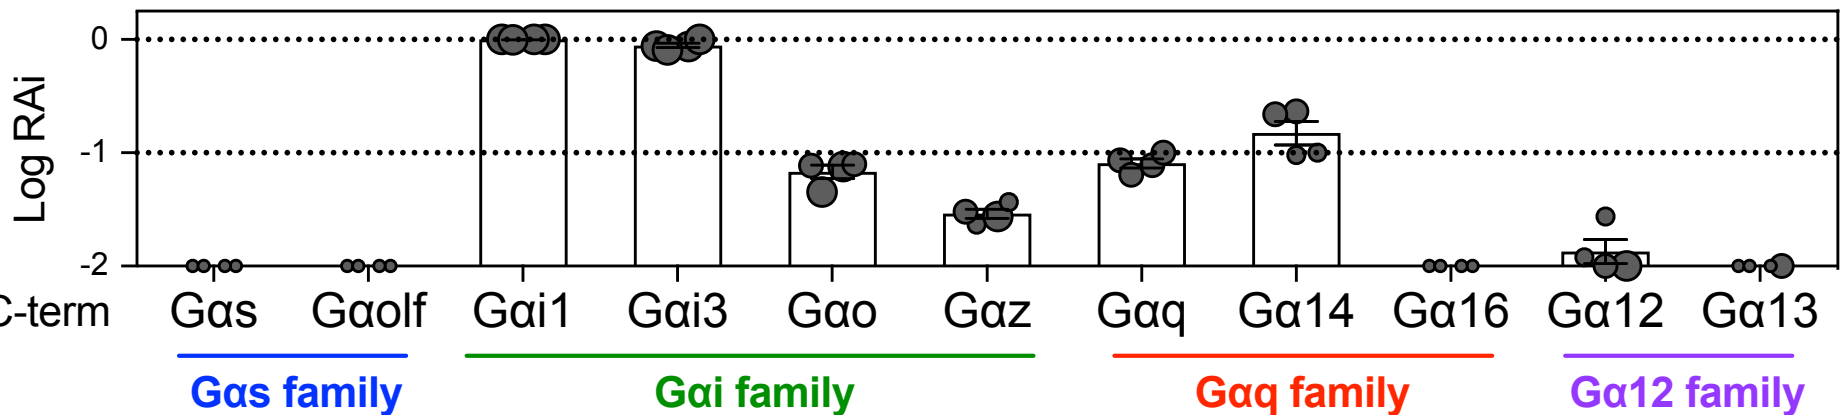



GPCR gene symbol: *AVPR1A*

GPCR name: V1A

Tested ligand: Arginine vasopressin

### C-terminal chimera co-expression

#### Gas family

#### Gai family

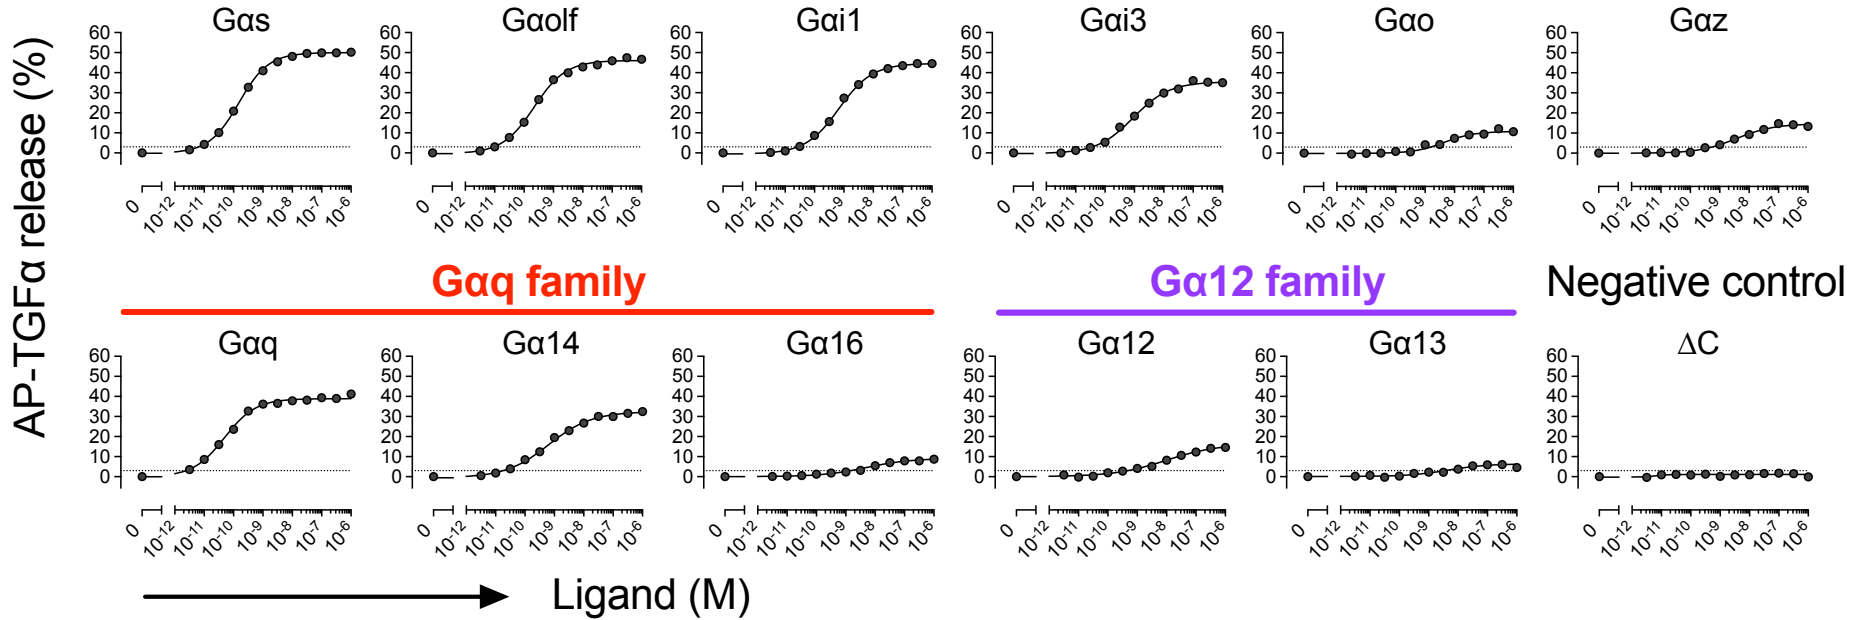

$E_{max}$  (%AP-TGFα release) ● <3% ● 3-5% ● 5-10% ● >10%

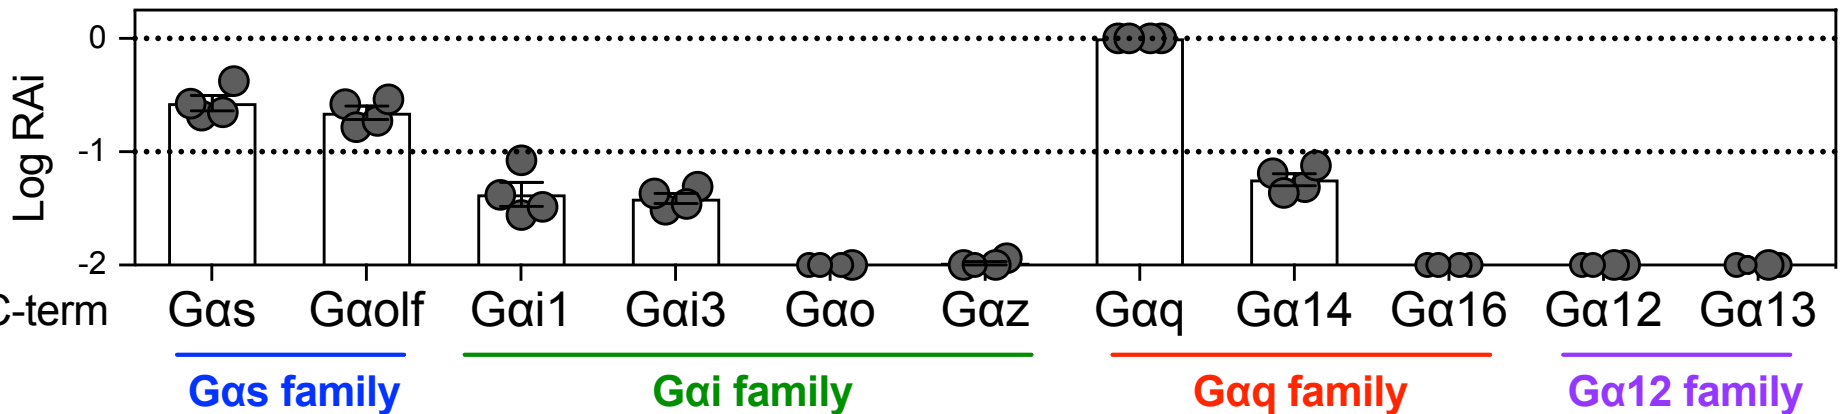

GPCR gene symbol: *AVPR1B*

GPCR name: V1B

Tested ligand: Arginine vasopressin

### C-terminal chimera co-expression

#### Gas family

#### Gai family

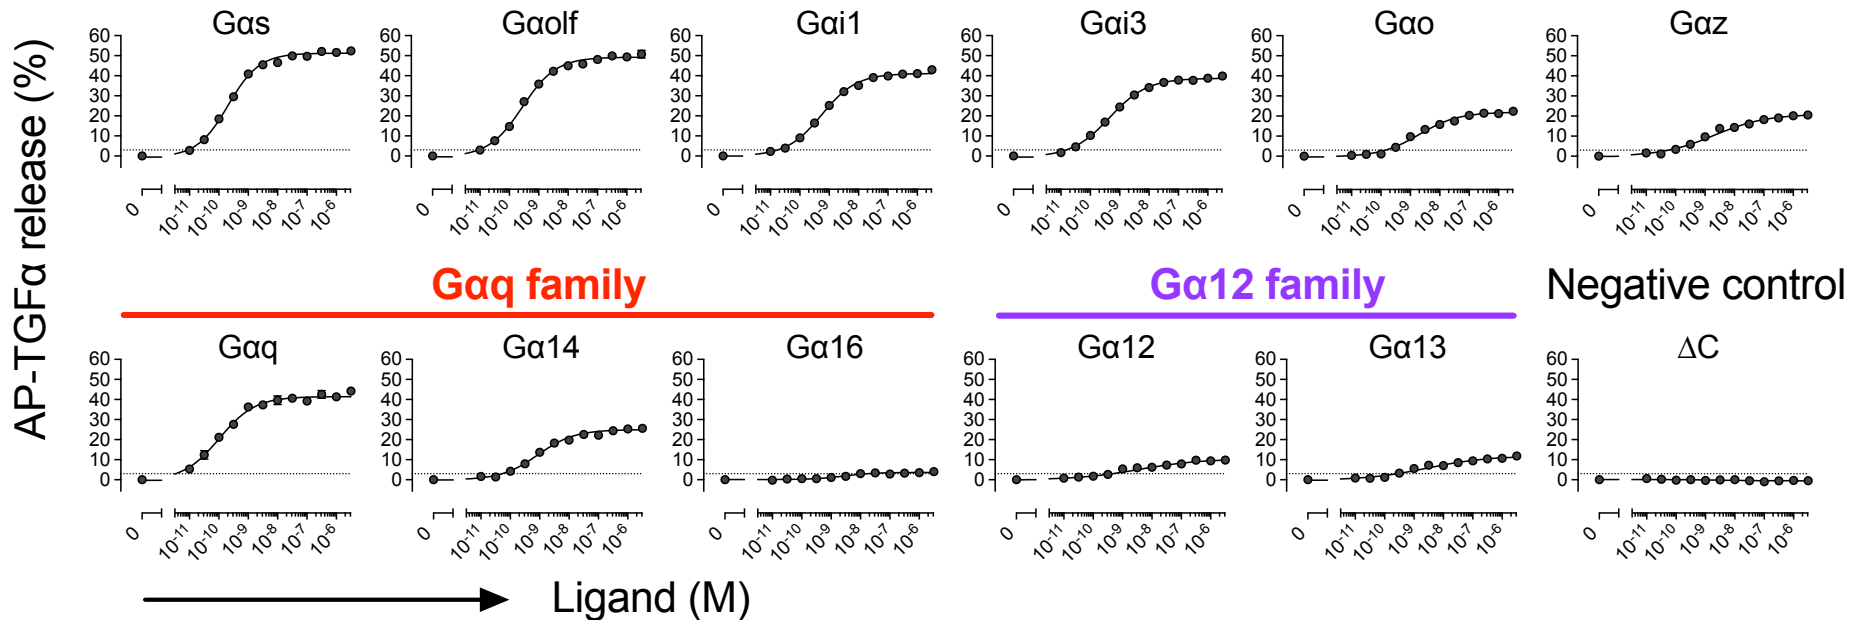

$E_{max}$  (%AP-TGFα release)    ● <3%    ● 3-5%    ● 5-10%    ● >10%

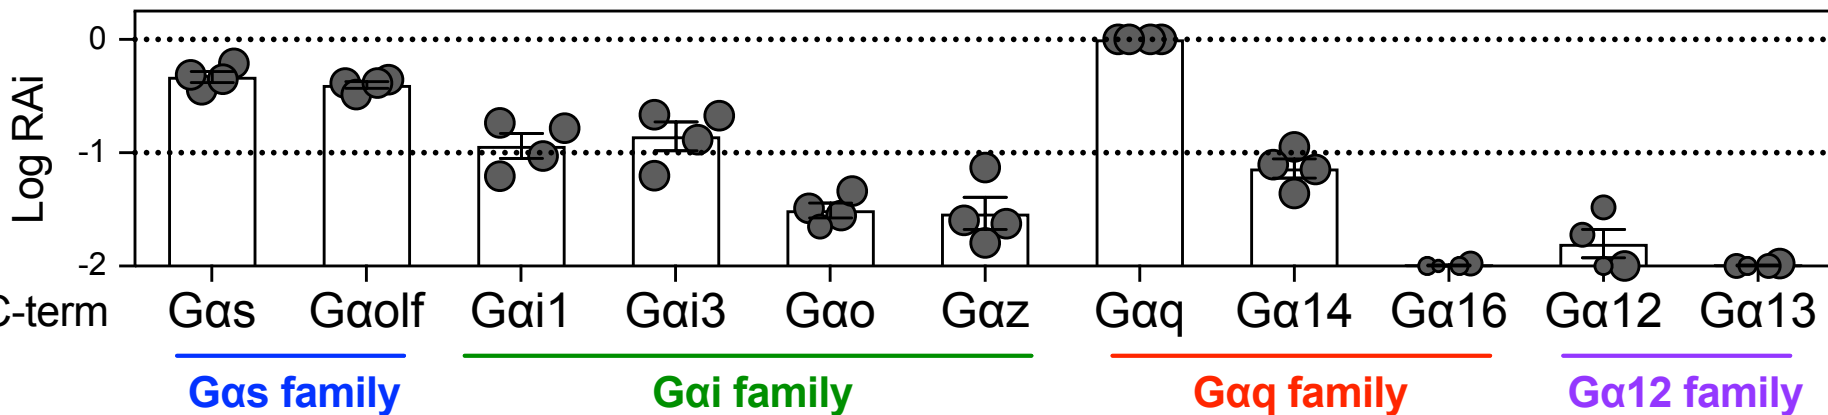

GPCR gene symbol: AVPR2

GPCR name: V2

Tested ligand: Arginine vasopressin

### C-terminal chimera co-expression

#### Gas family

#### Gai family

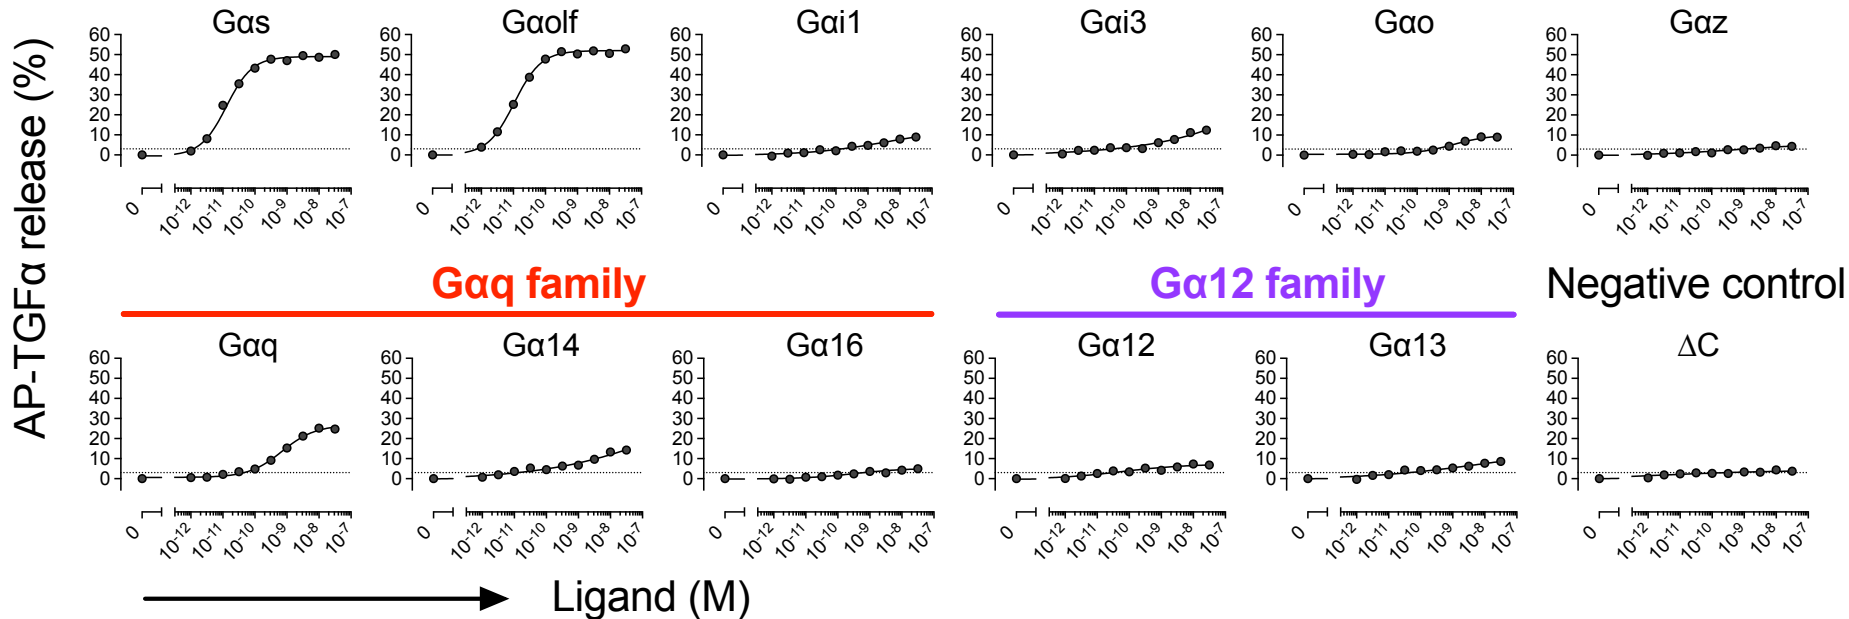

$E_{max}$  (%AP-TGFα release)    ● <3%    ● 3-5%    ● 5-10%    ● >10%

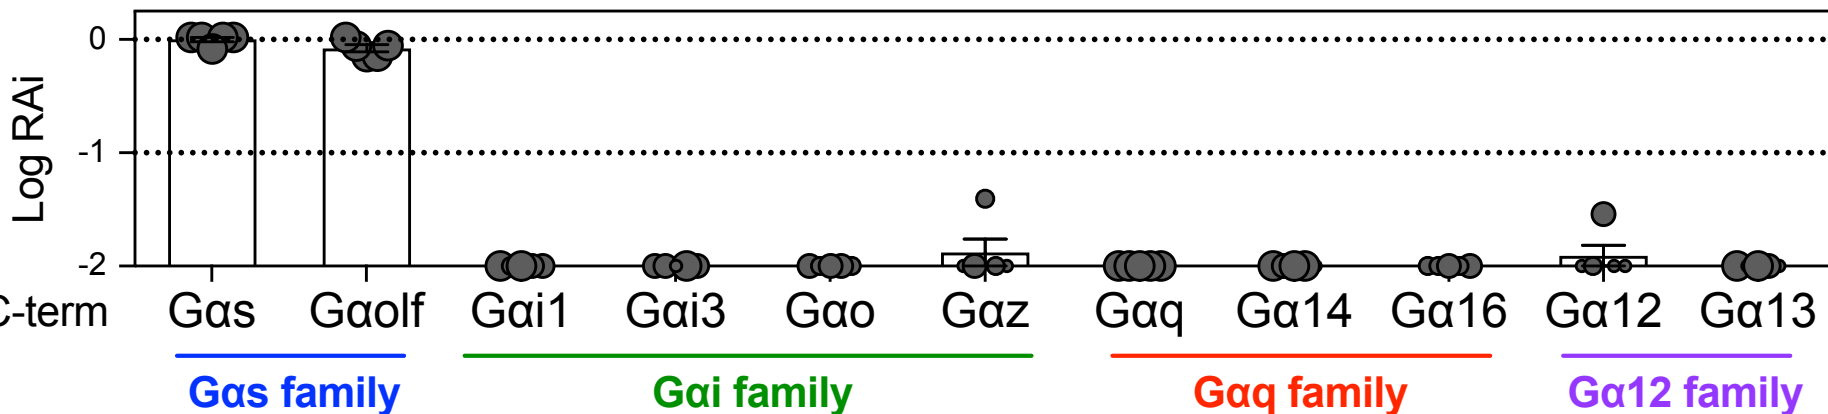

GPCR gene symbol: *BDKRB1*

GPCR name: B1

Tested ligand: Kallidin

### C-terminal chimera co-expression

#### Gas family

#### Gai family

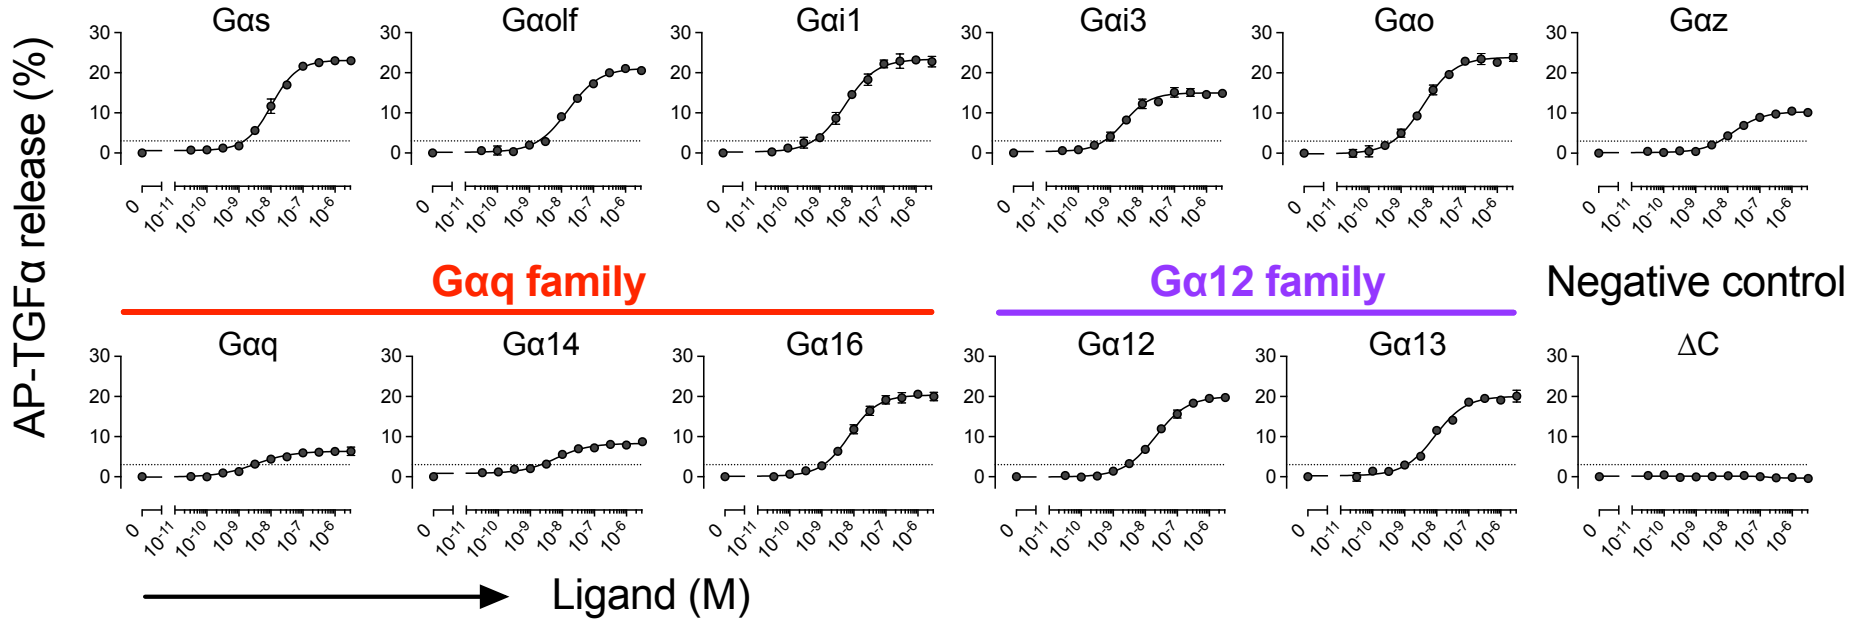

$E_{max}$  (%AP-TGFα release)

● <3%   ● 3-5%   ● 5-10%   ● >10%

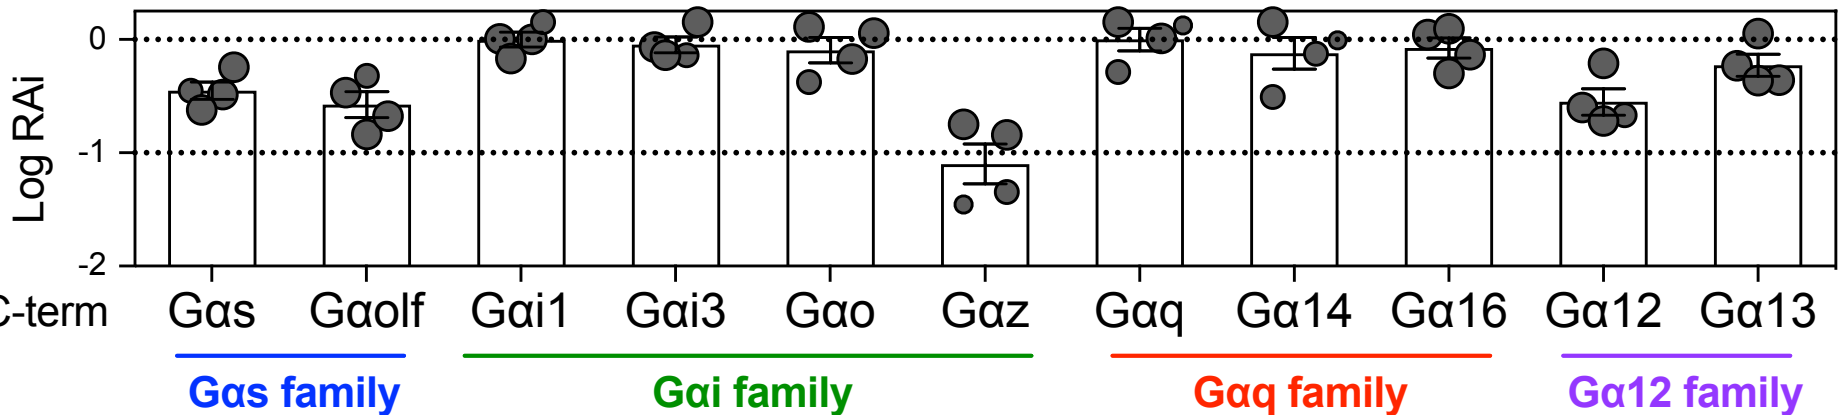

GPCR gene symbol: *BDKRB2*

GPCR name: B2

Tested ligand: Bradykinin

### C-terminal chimera co-expression

#### Gas family

#### Gai family

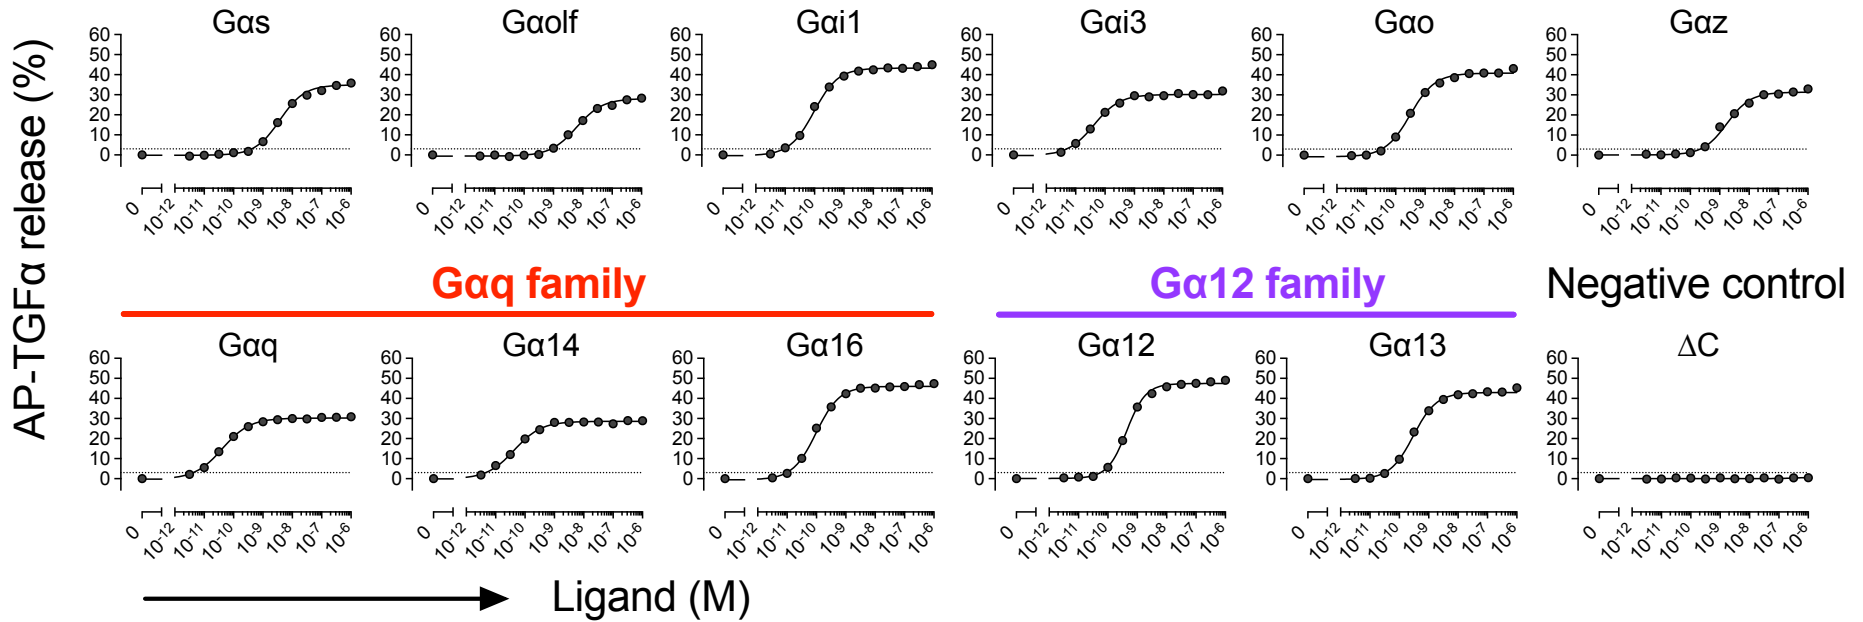

$E_{max}$  (%AP-TGFα release)

● <3%   ● 3-5%   ● 5-10%   ● >10%

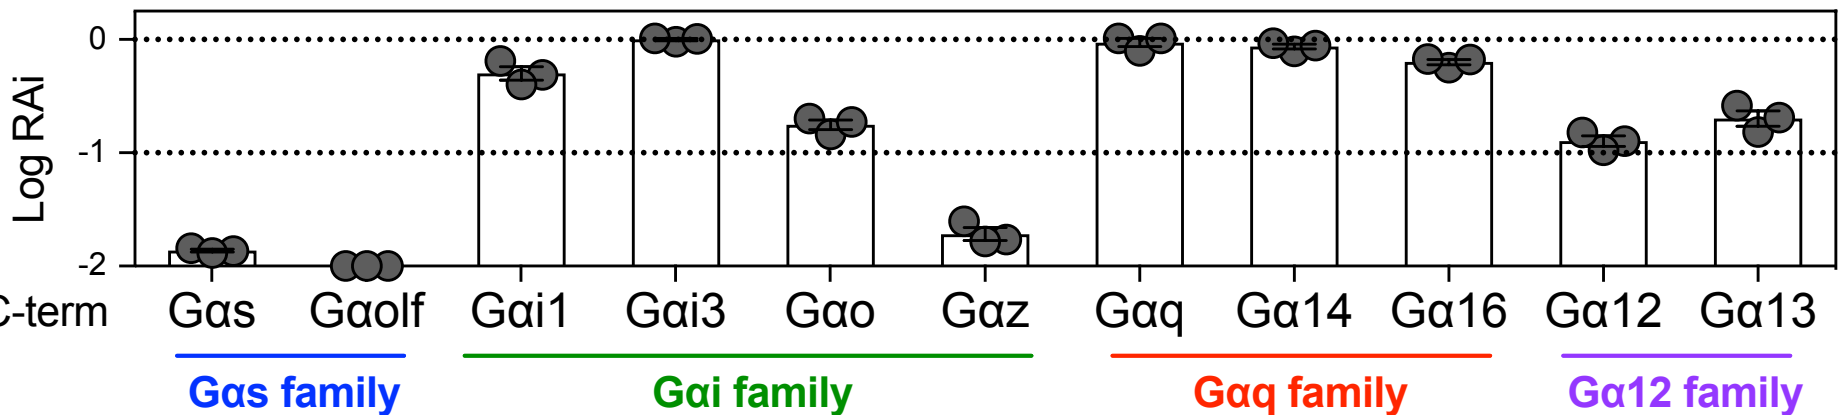

GPCR gene symbol: *CCKAR*  
 GPCR name: CCK1  
 Tested ligand: CCK-octapeptide

### C-terminal chimera co-expression

#### Gas family

#### Gai family

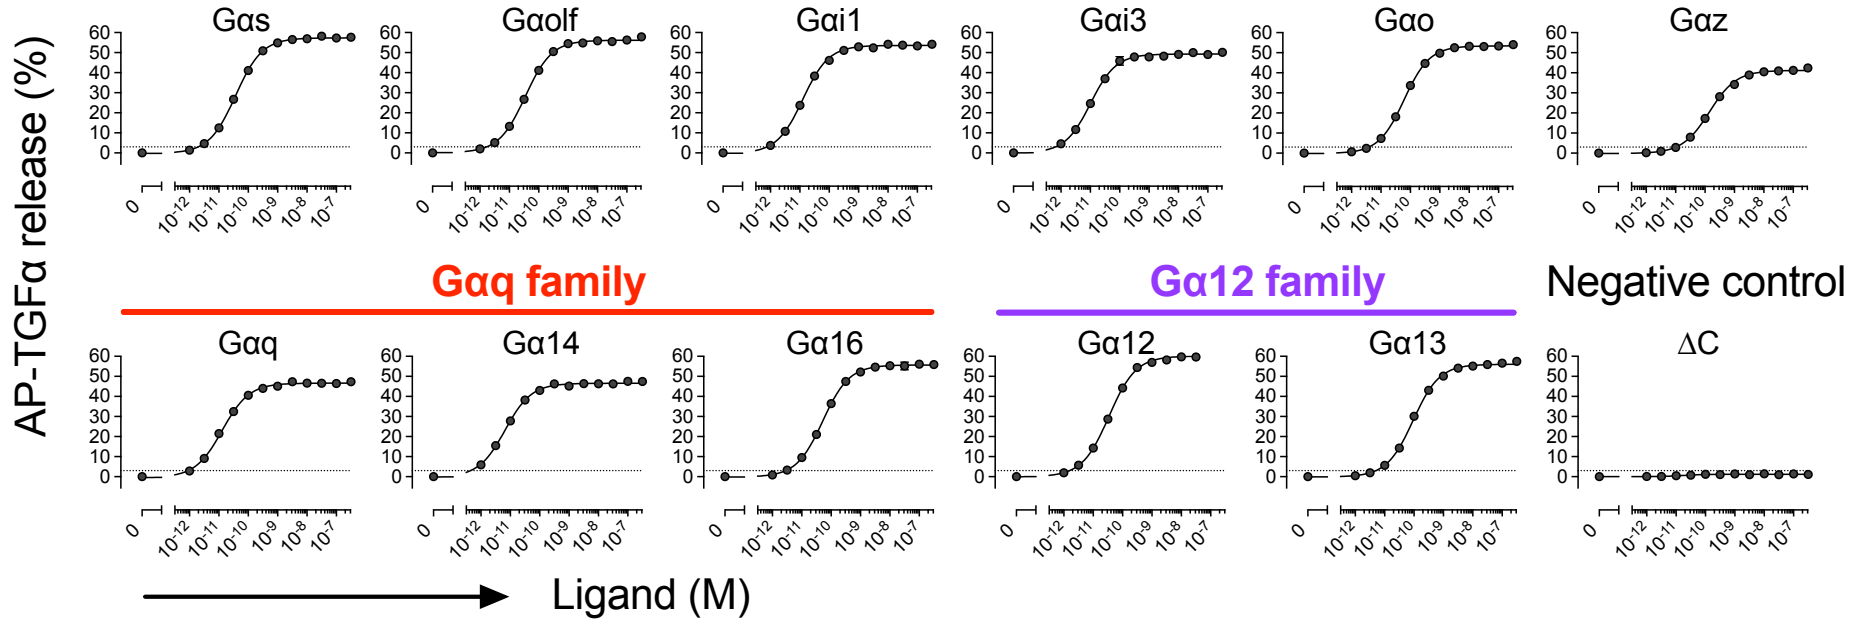

$E_{max}$  (%AP-TGFα release)    ● <3%    ● 3-5%    ● 5-10%    ● >10%

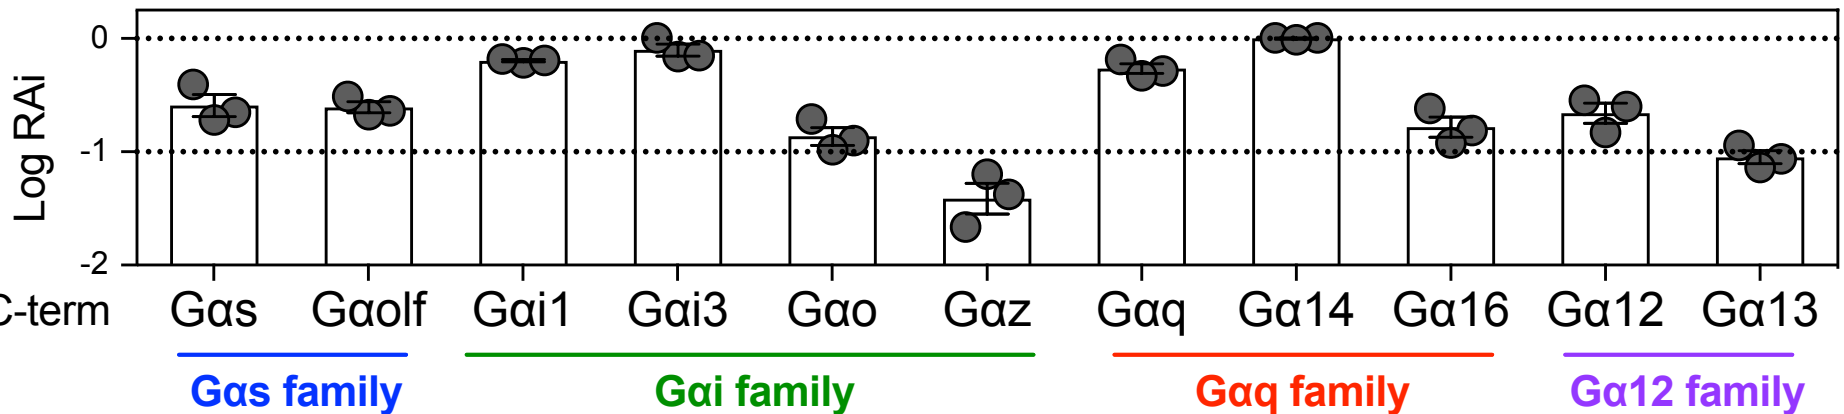

GPCR gene symbol: *CCKBR*  
 GPCR name: CCK2  
 Tested ligand: CCK-octapeptide

### C-terminal chimera co-expression

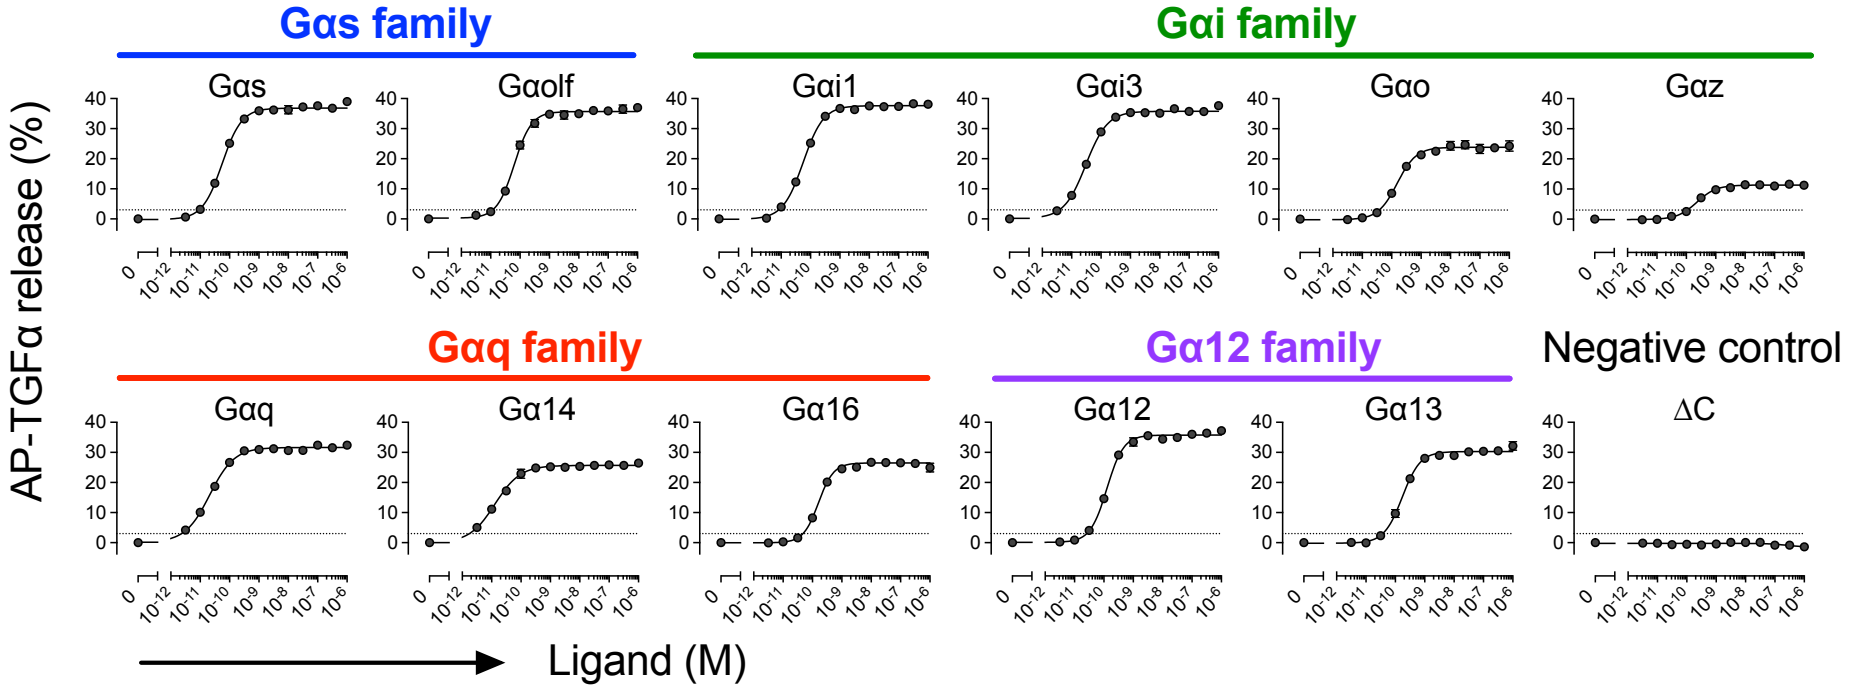

$E_{max}$  (%AP-TGFα release)    ● <3%    ● 3-5%    ● 5-10%    ● >10%

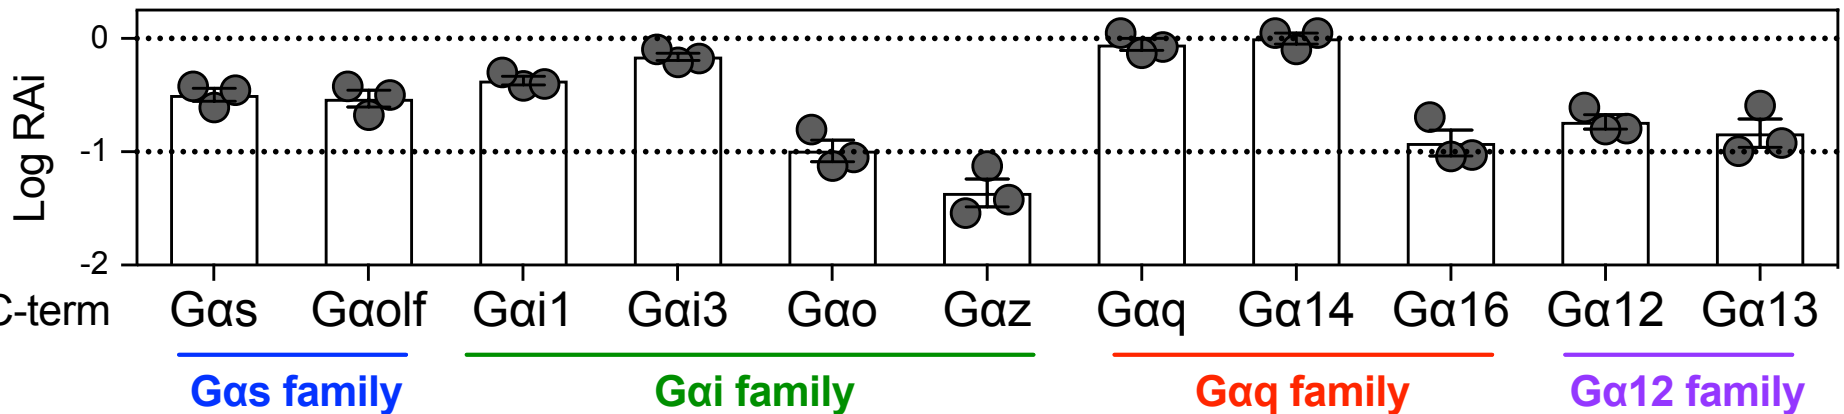

GPCR gene symbol: *CHRM1*

GPCR name: M1

Tested ligand: Acetylcholine

### C-terminal chimera co-expression

#### Gas family

#### Gai family

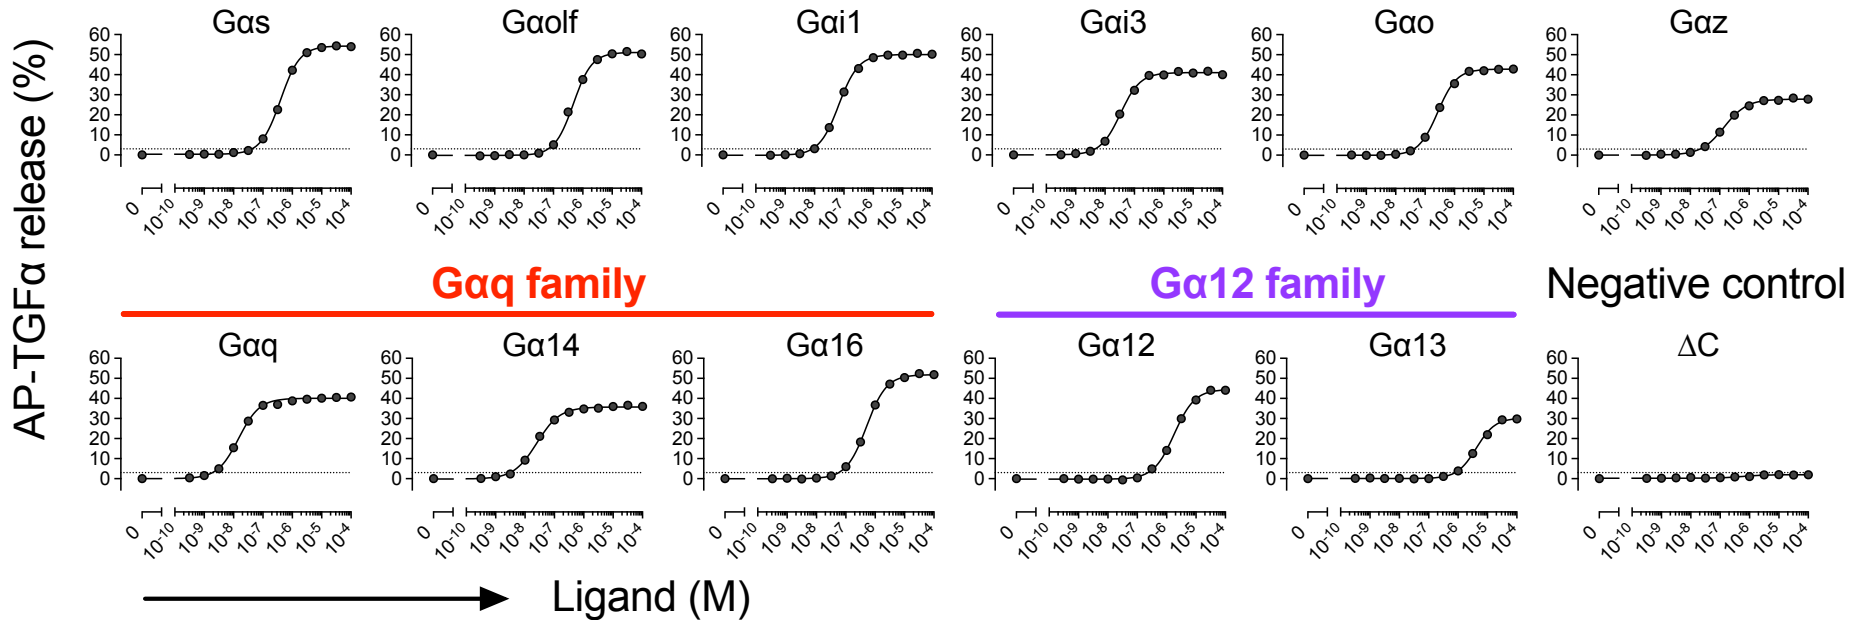

$E_{max}$  (%AP-TGF $\alpha$  release)    ● <3%    ● 3-5%    ● 5-10%    ● >10%

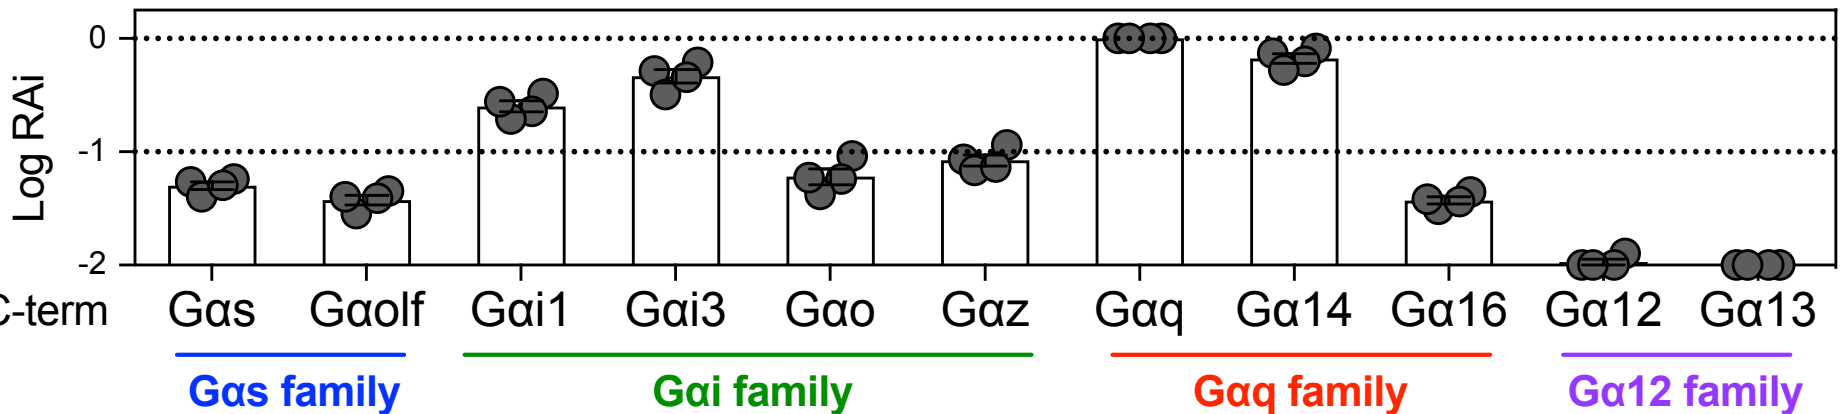



GPCR gene symbol: *CHRM2*

GPCR name: M2

Tested ligand: Acetylcholine

### C-terminal chimera co-expression

#### Gas family

#### Gai family

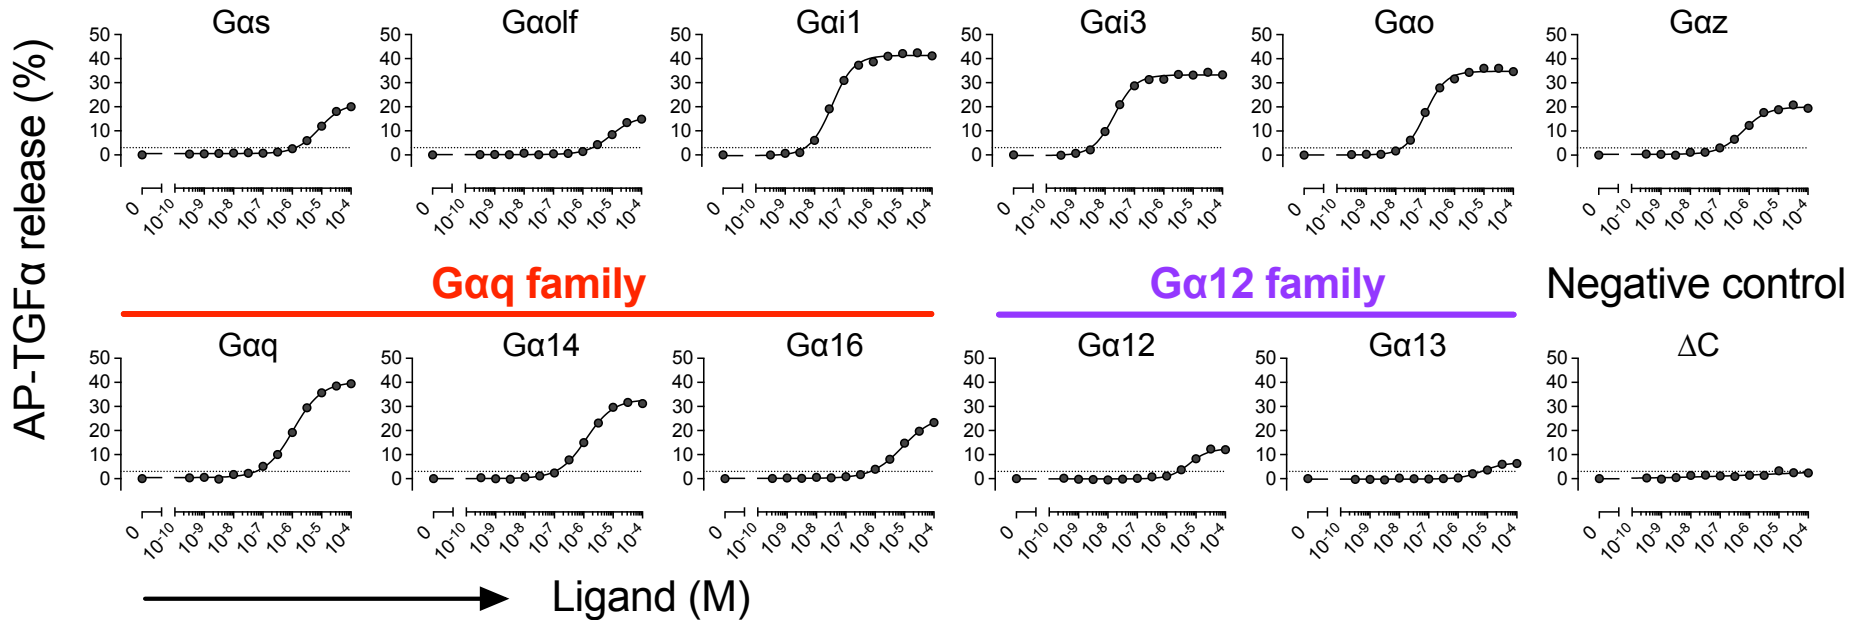

$E_{max}$  (%AP-TGFα release)    ● <3%    ● 3-5%    ● 5-10%    ● >10%

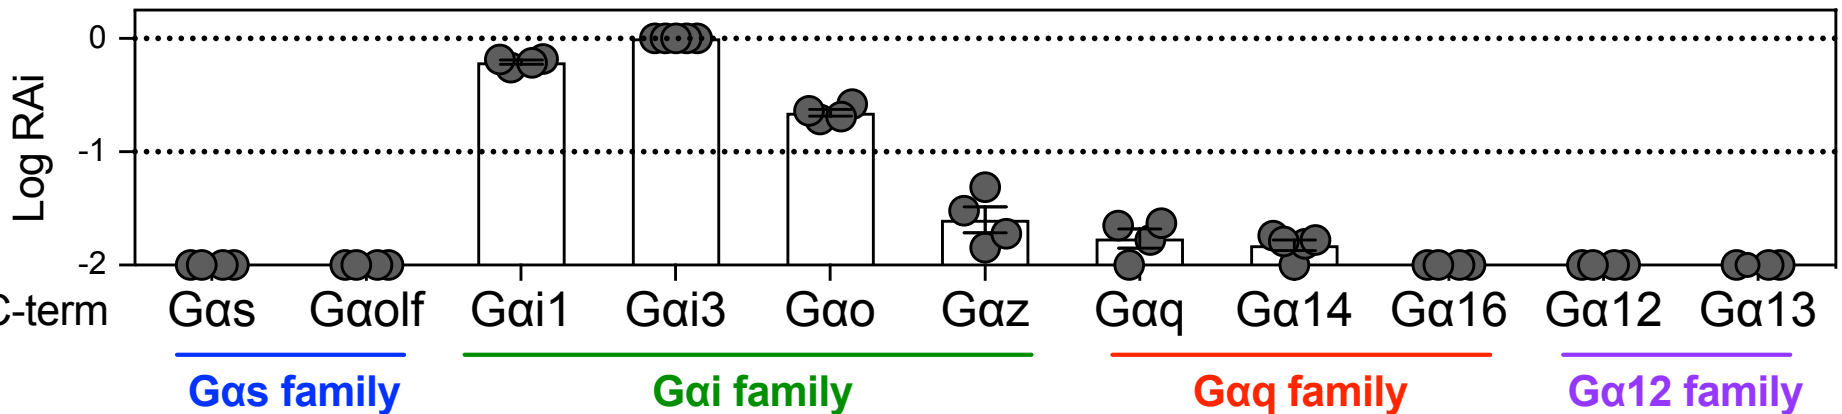

GPCR gene symbol: *CHRM3*

GPCR name: M3

Tested ligand: Acetylcholine

### C-terminal chimera co-expression

#### Gas family

#### Gai family

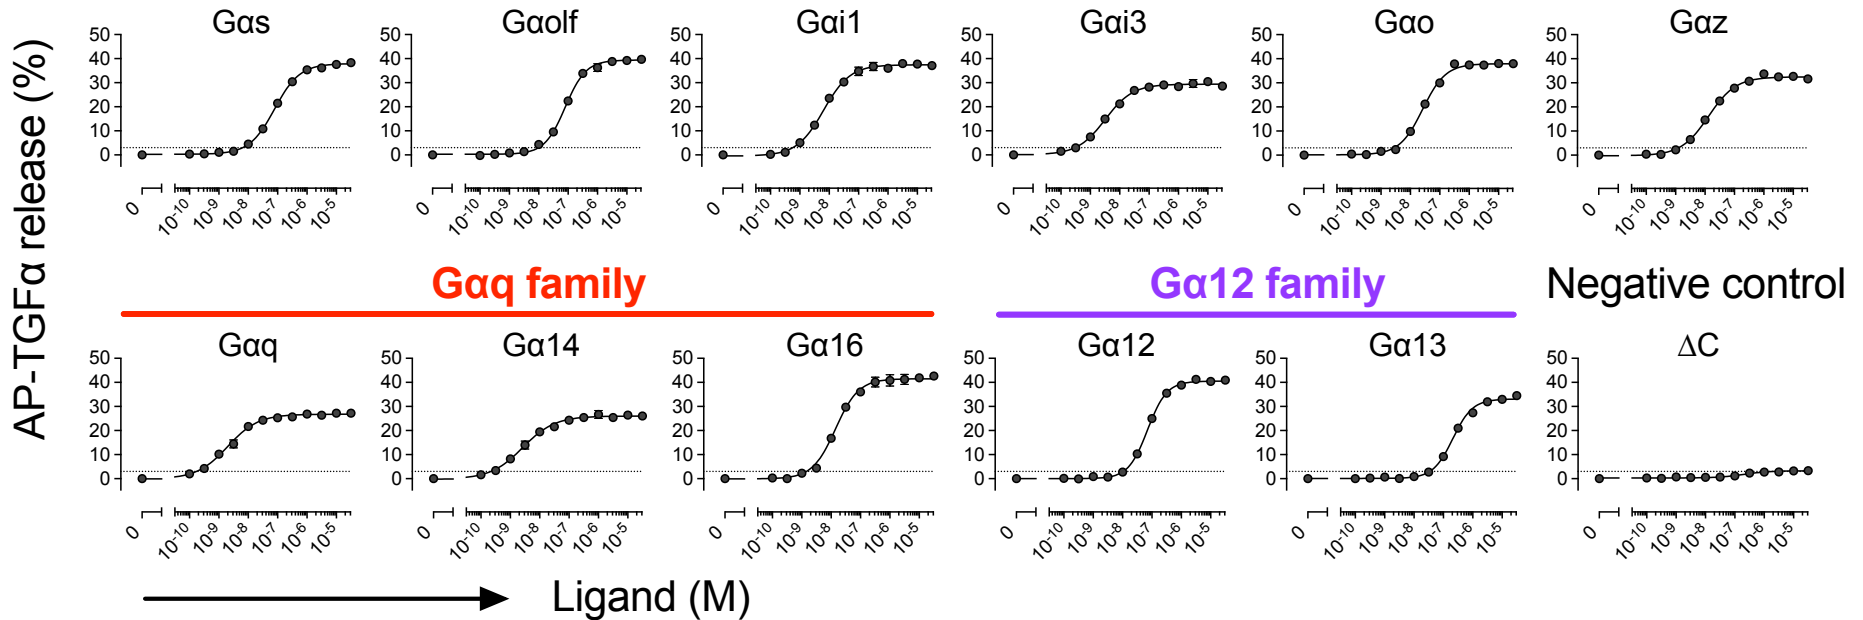

$E_{max}$  (%AP-TGFα release)    ● <3%    ● 3-5%    ● 5-10%    ● >10%

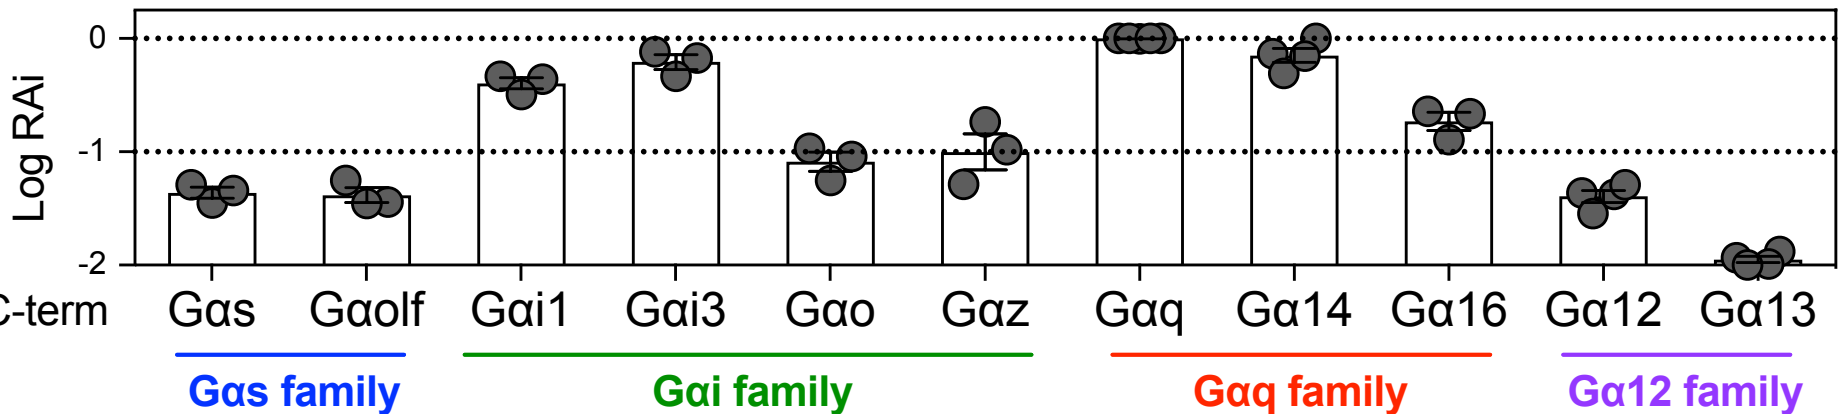

GPCR gene symbol: *CHRM4*

GPCR name: M4

Tested ligand: Acetylcholine

### C-terminal chimera co-expression

#### Gas family

#### Gai family

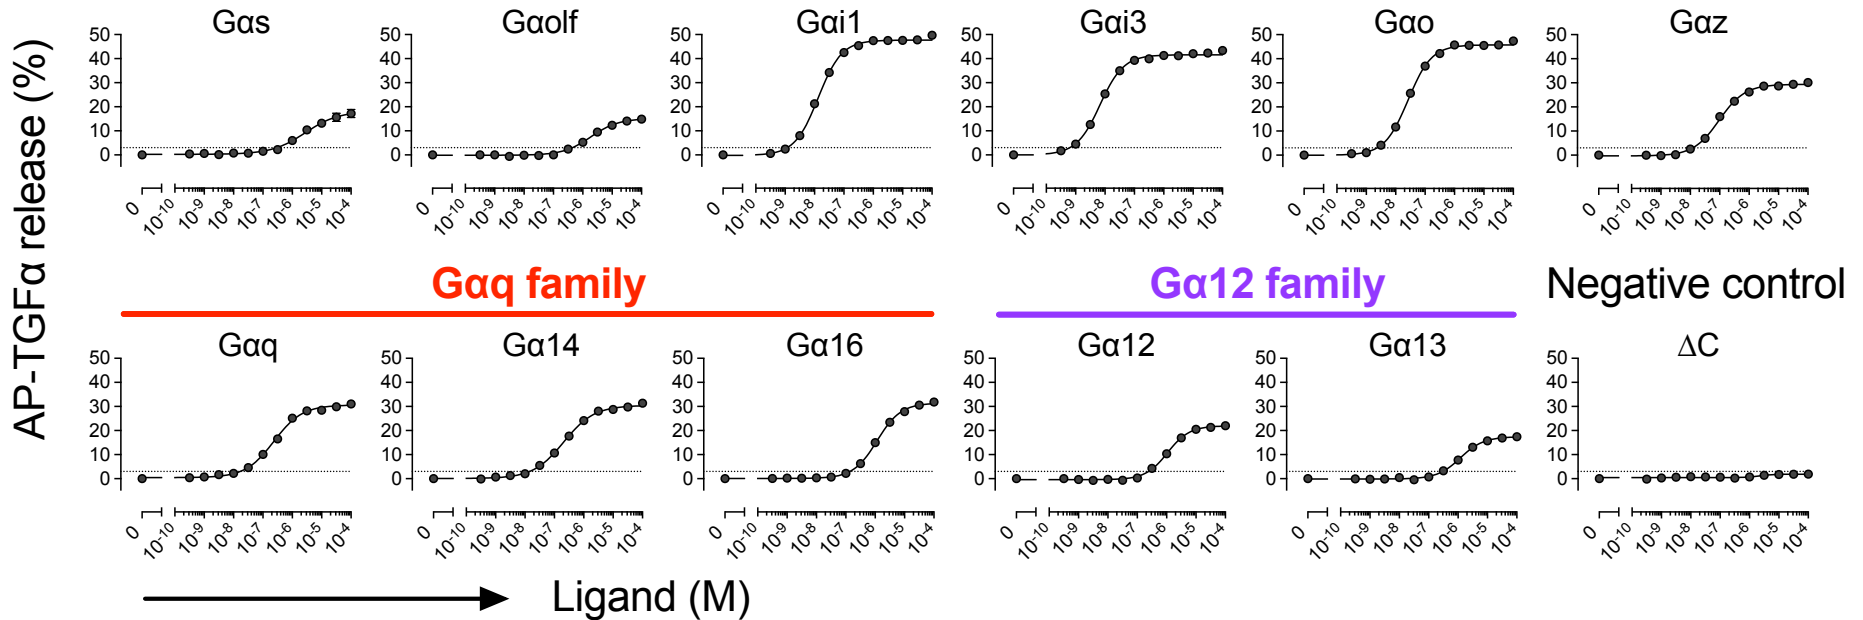

$E_{max}$  (%AP-TGFα release)    ● <3%    ● 3-5%    ● 5-10%    ● >10%

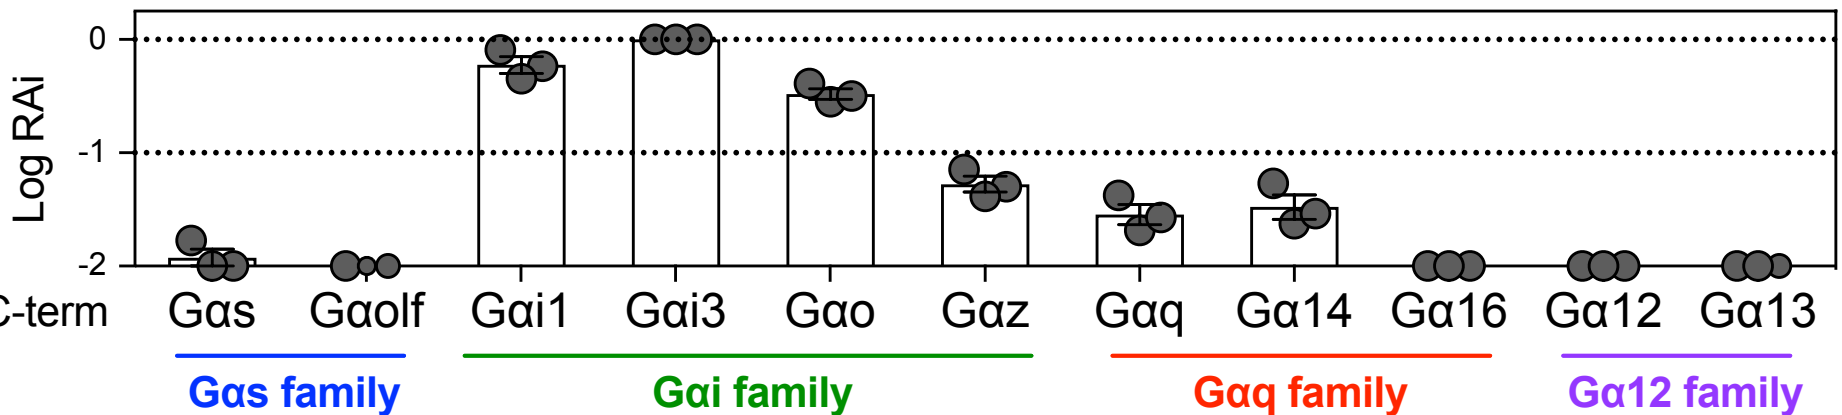

GPCR gene symbol: *CHRM5*

GPCR name: M5

Tested ligand: Acetylcholine

### C-terminal chimera co-expression

#### Gas family

#### Gai family

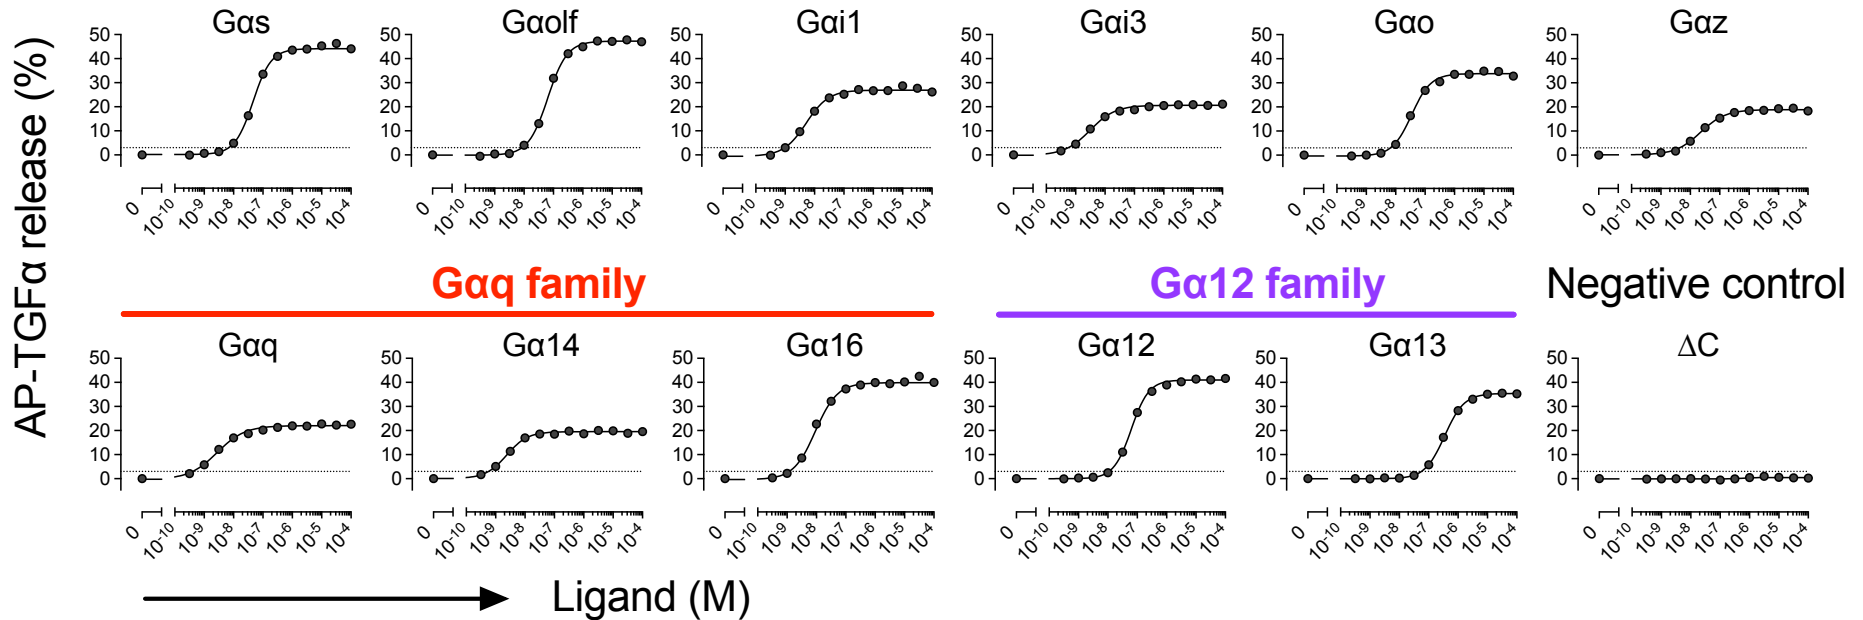

$E_{max}$  (%AP-TGFα release)

● <3%   ● 3-5%   ● 5-10%   ● >10%

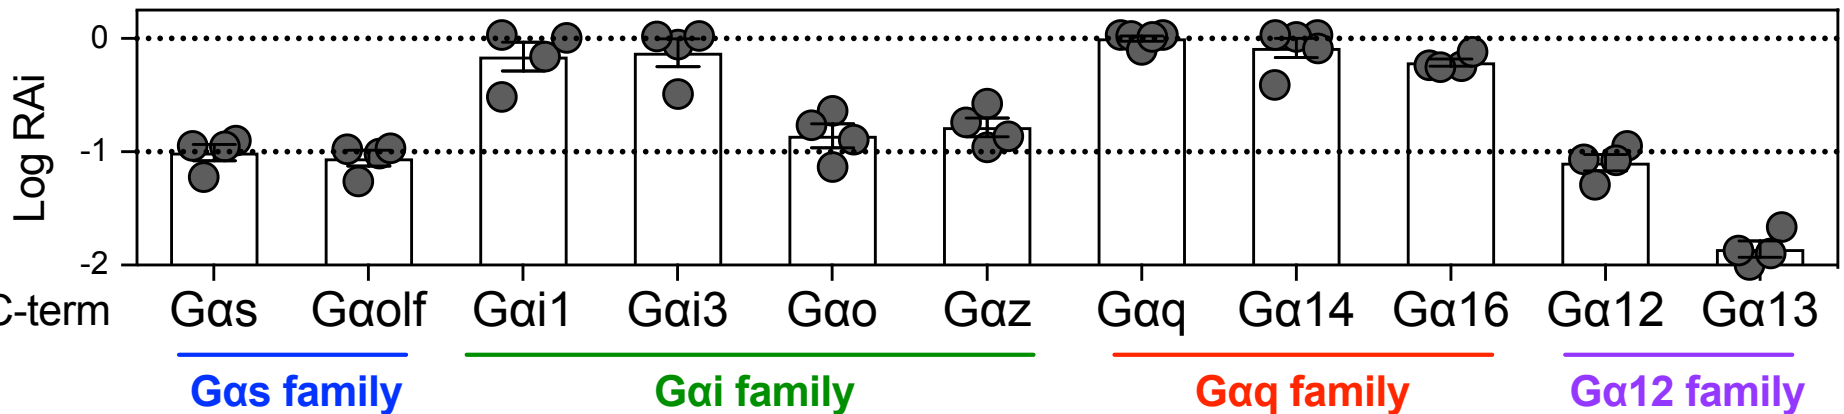

GPCR gene symbol: *CNR1*

GPCR name: CB1

Tested ligand: CP-55940

### C-terminal chimera co-expression

#### Gas family

#### Gai family

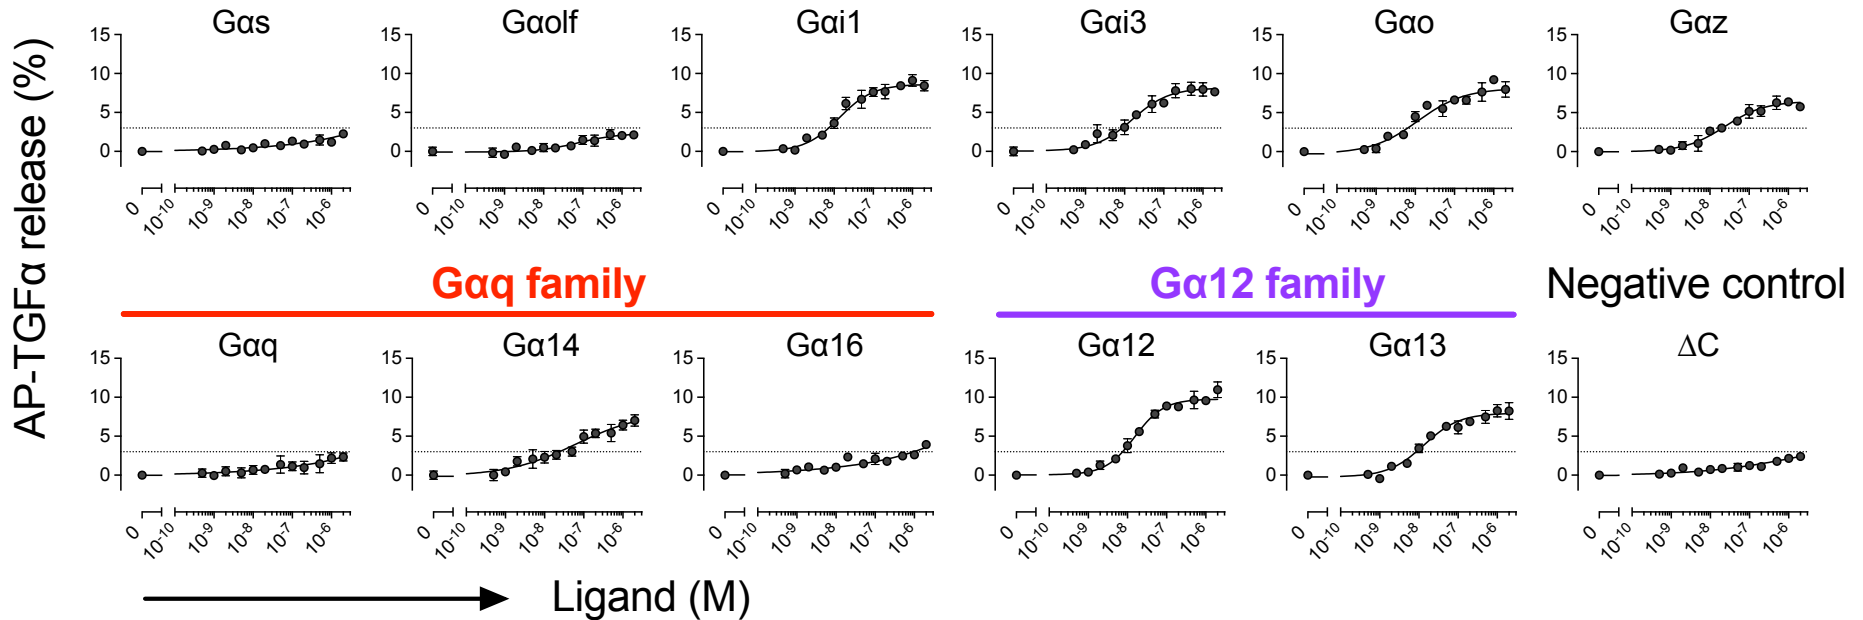

$E_{max}$  (%AP-TGFα release)    ● <3%    ● 3-5%    ● 5-10%    ● >10%

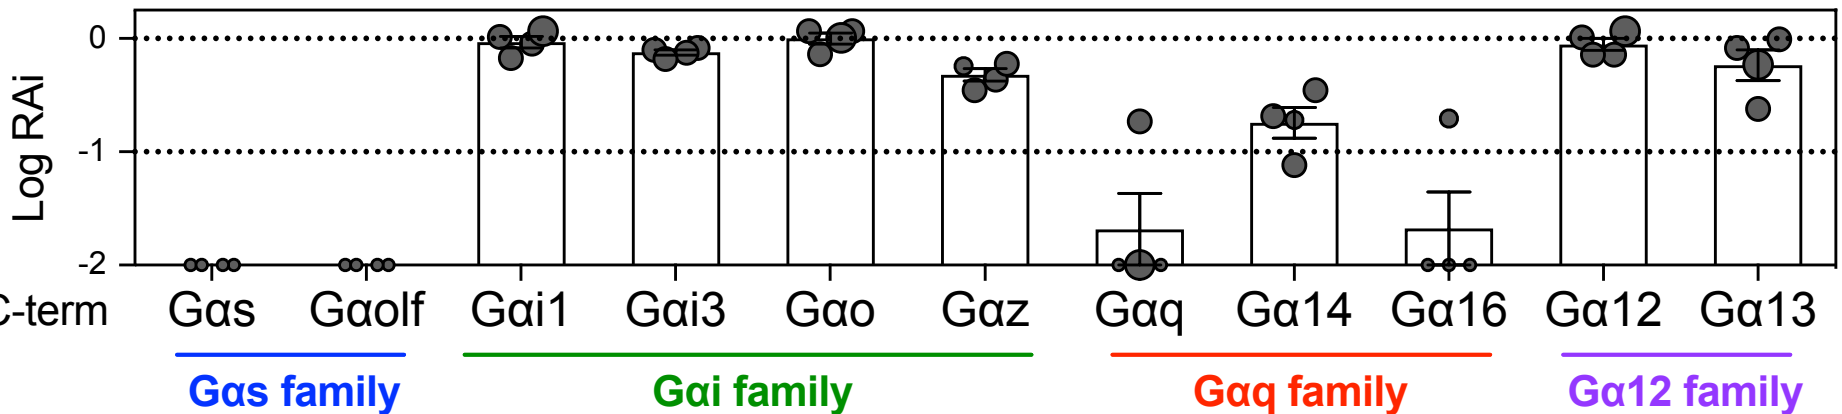

GPCR gene symbol: *CNR2*

GPCR name: CB2

Tested ligand: CP-55940

### C-terminal chimera co-expression

#### Gas family

#### Gai family

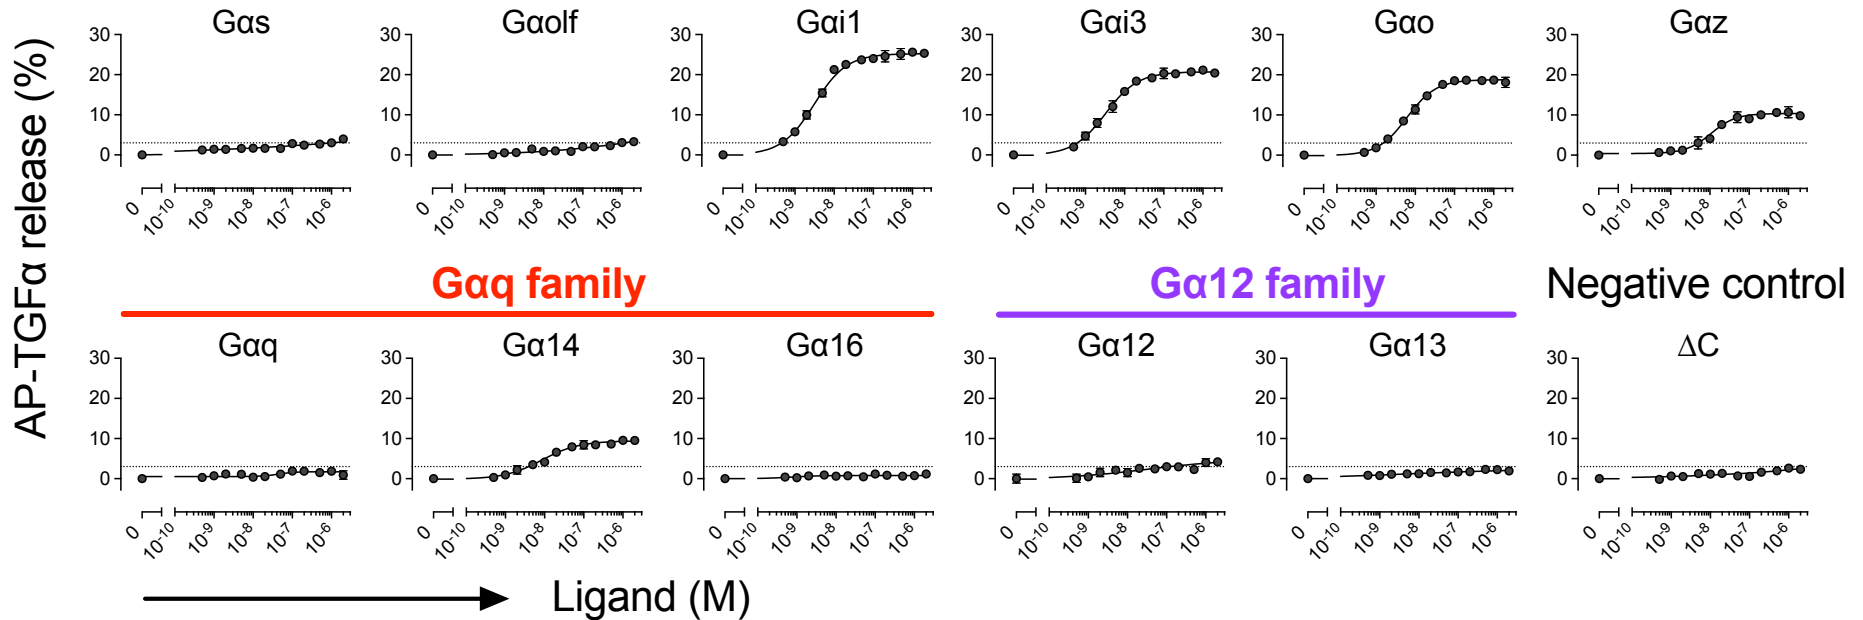

$E_{max}$  (%AP-TGFα release)

● <3%   ● 3-5%   ● 5-10%   ● >10%

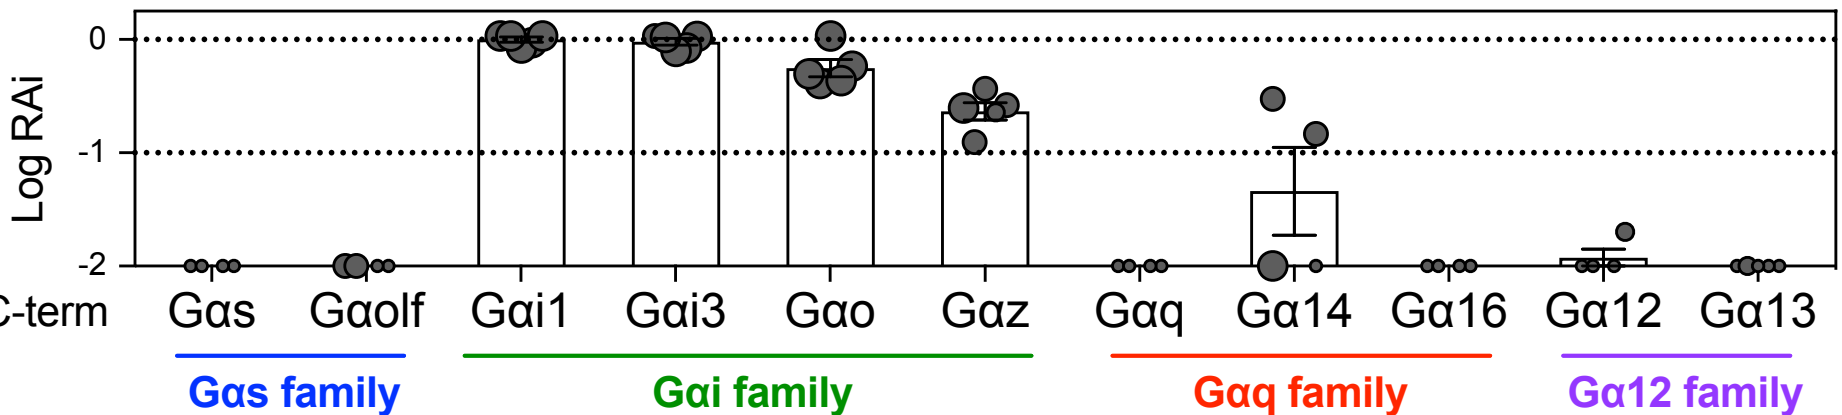

GPCR gene symbol: *CYSLTR1*

GPCR name: CysLT1

Tested ligand: Leukotriene D4

### C-terminal chimera co-expression

#### Gas family

#### Gai family

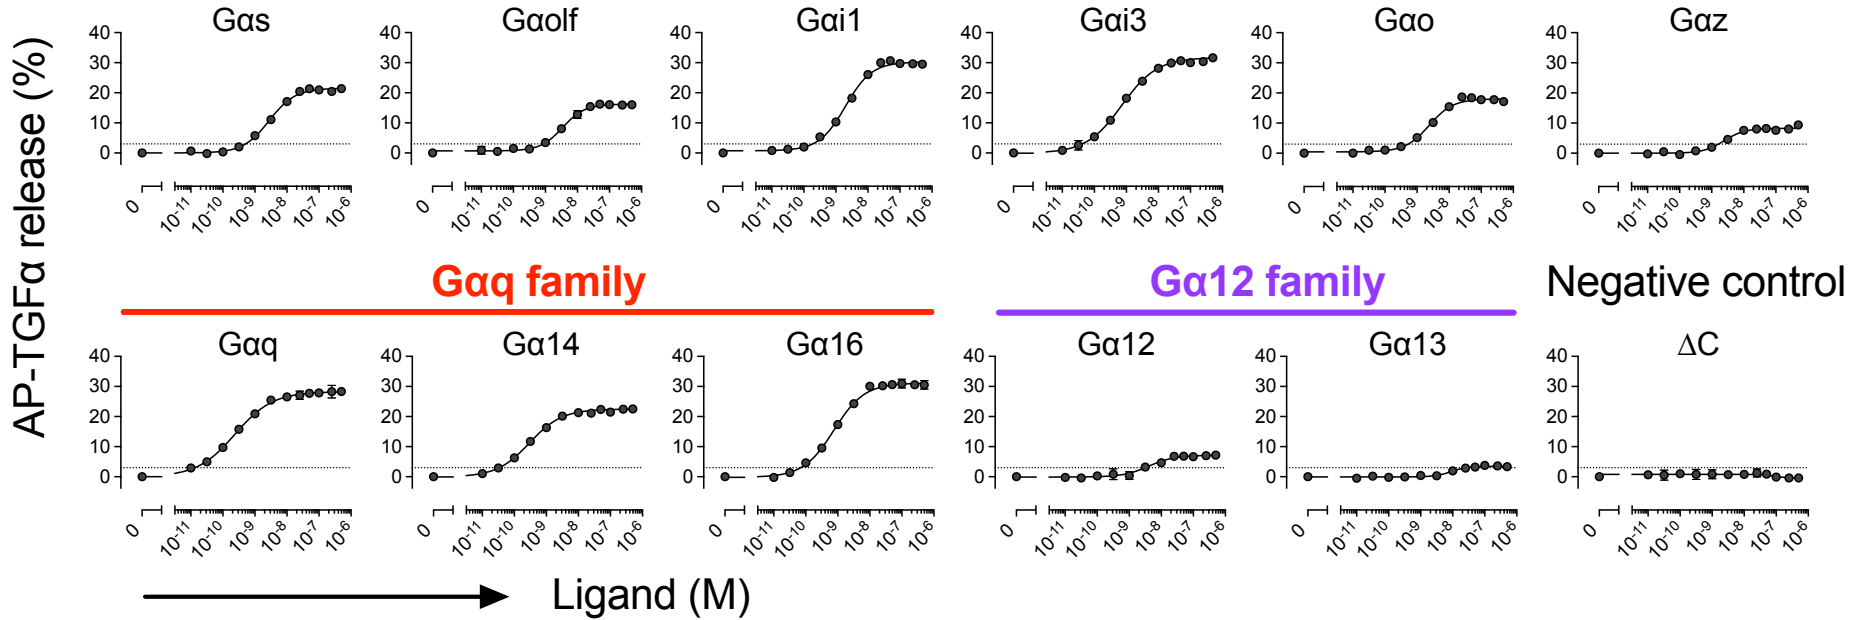

$E_{max}$  (%AP-TGFα release)    ● <3%    ● 3-5%    ● 5-10%    ● >10%

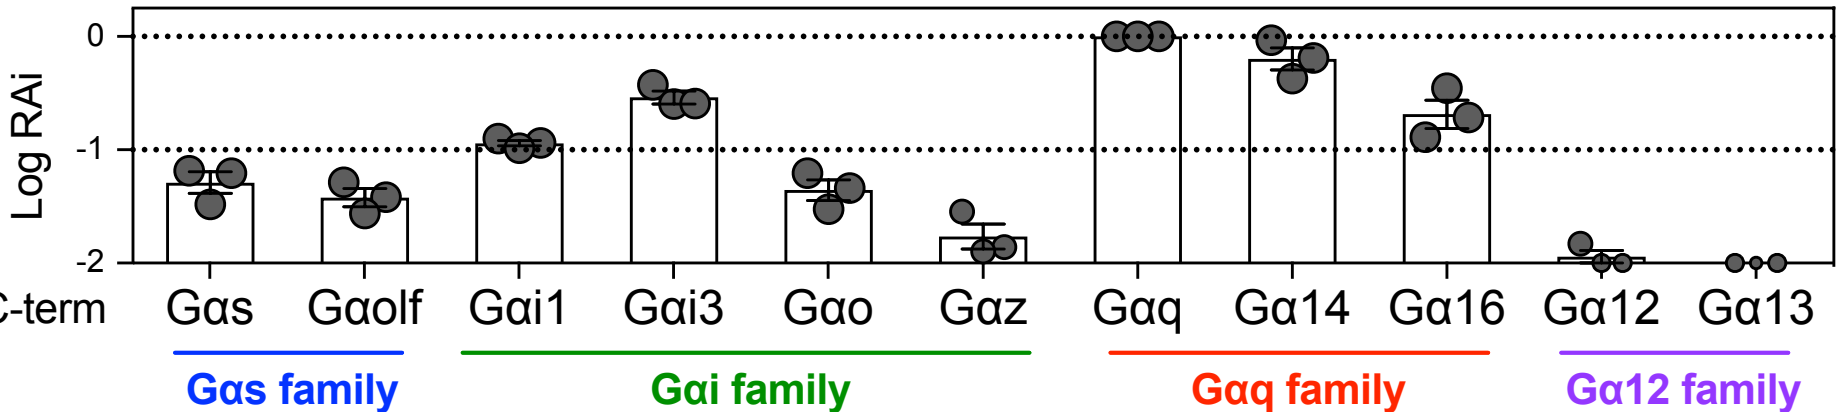

GPCR gene symbol: *CYSLTR2*

GPCR name: CysLT2

Tested ligand: Leukotriene D4

### C-terminal chimera co-expression

#### Gas family

#### Gai family

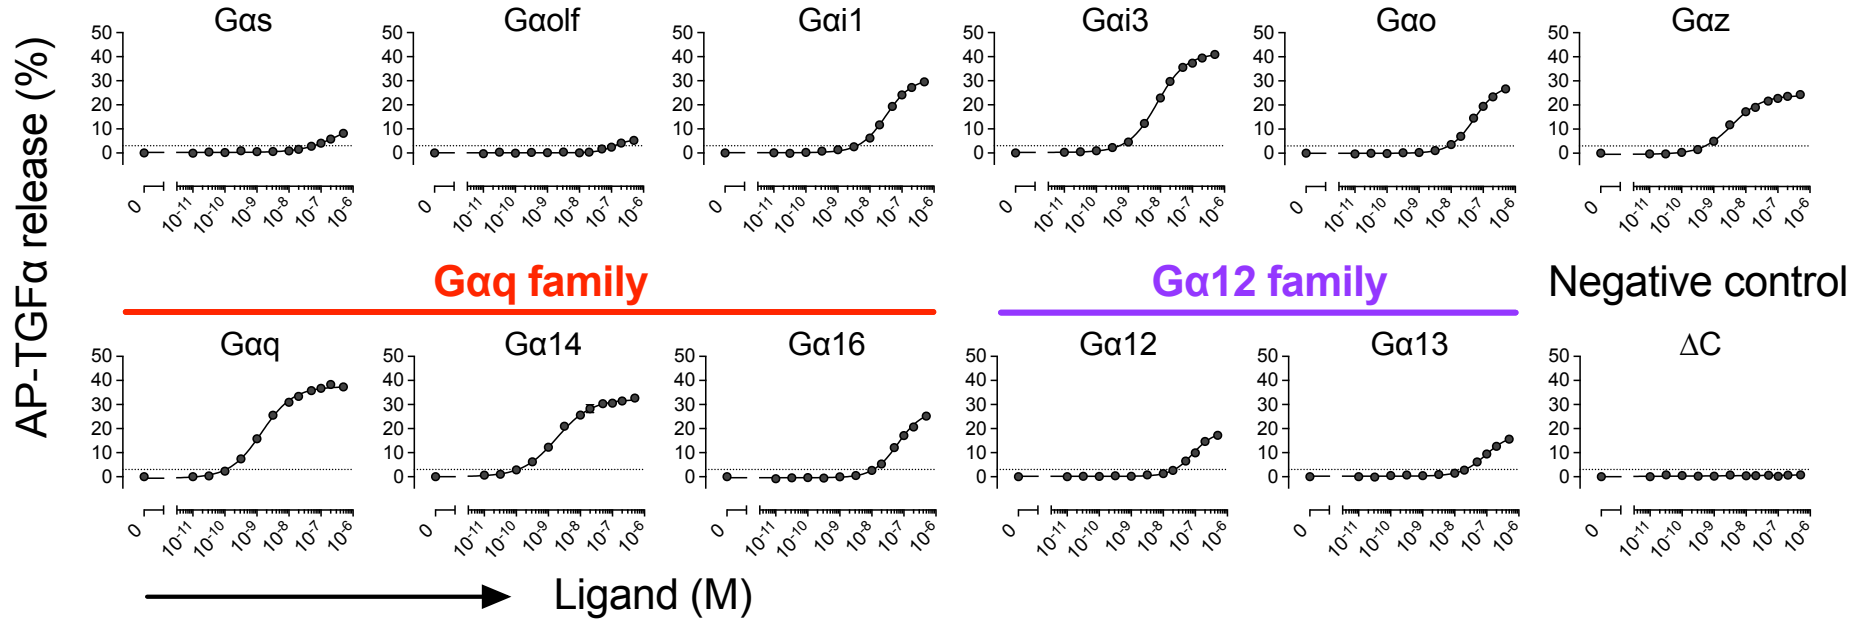

$E_{max}$  (%AP-TGF $\alpha$  release)    • <3%    • 3-5%    • 5-10%    • >10%

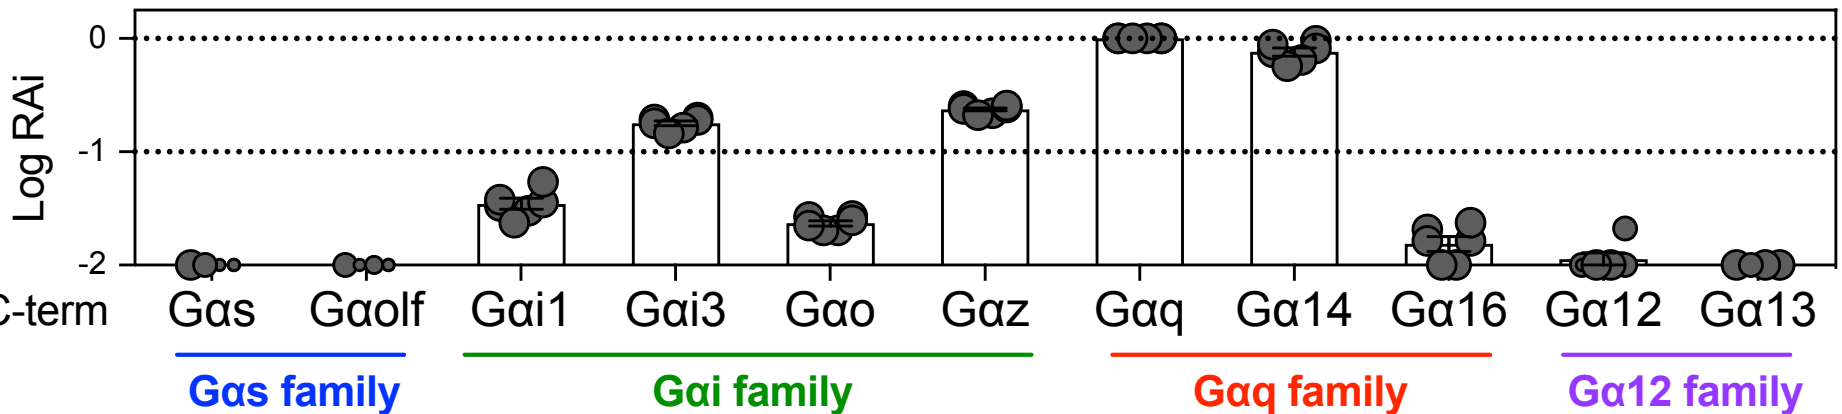



GPCR gene symbol: *DRD1*

GPCR name: D1

Tested ligand: Dopamine

### C-terminal chimera co-expression

#### Gas family

#### Gai family

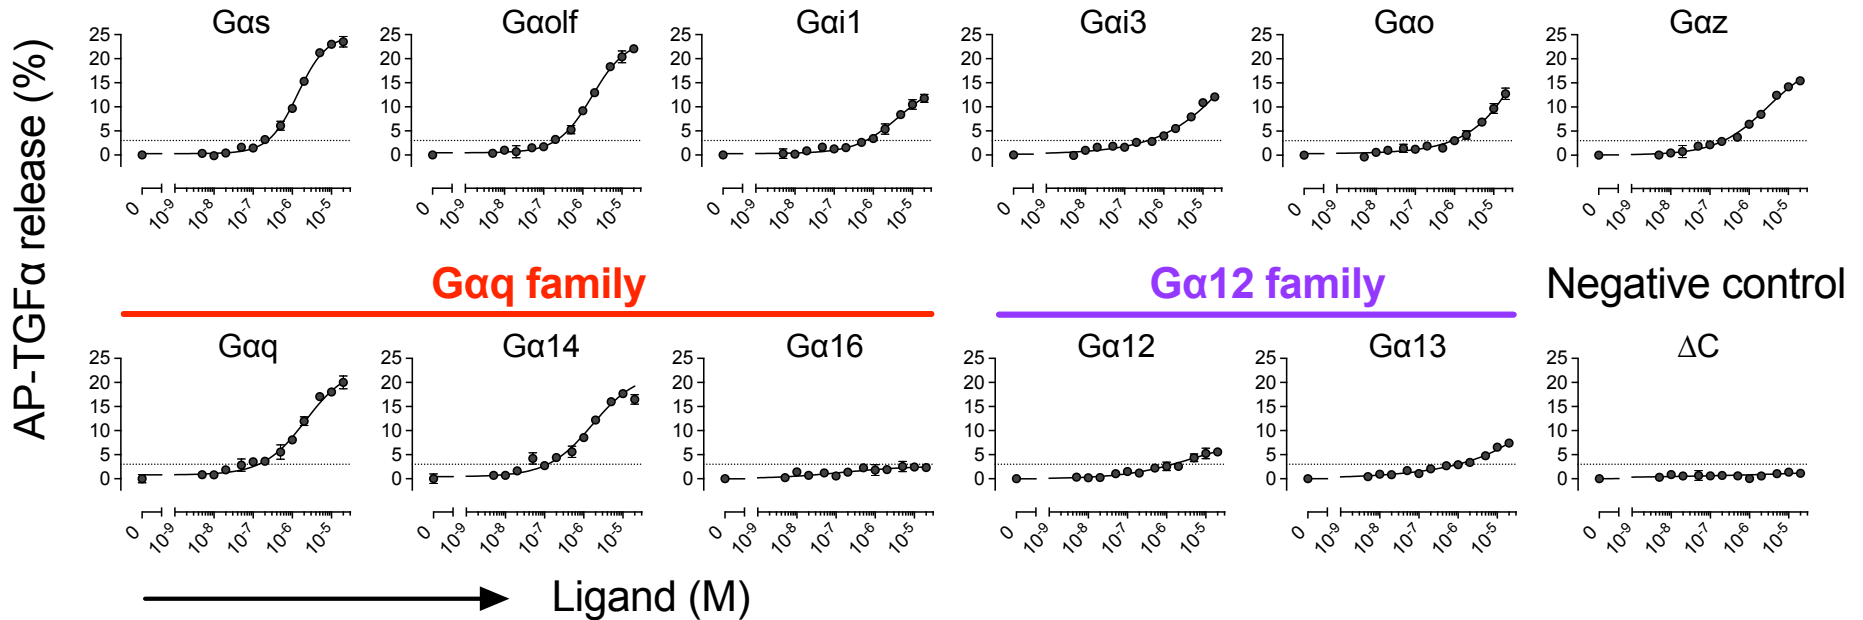

$E_{max}$  (%AP-TGFα release)

● <3%

● 3-5%

● 5-10%

● >10%

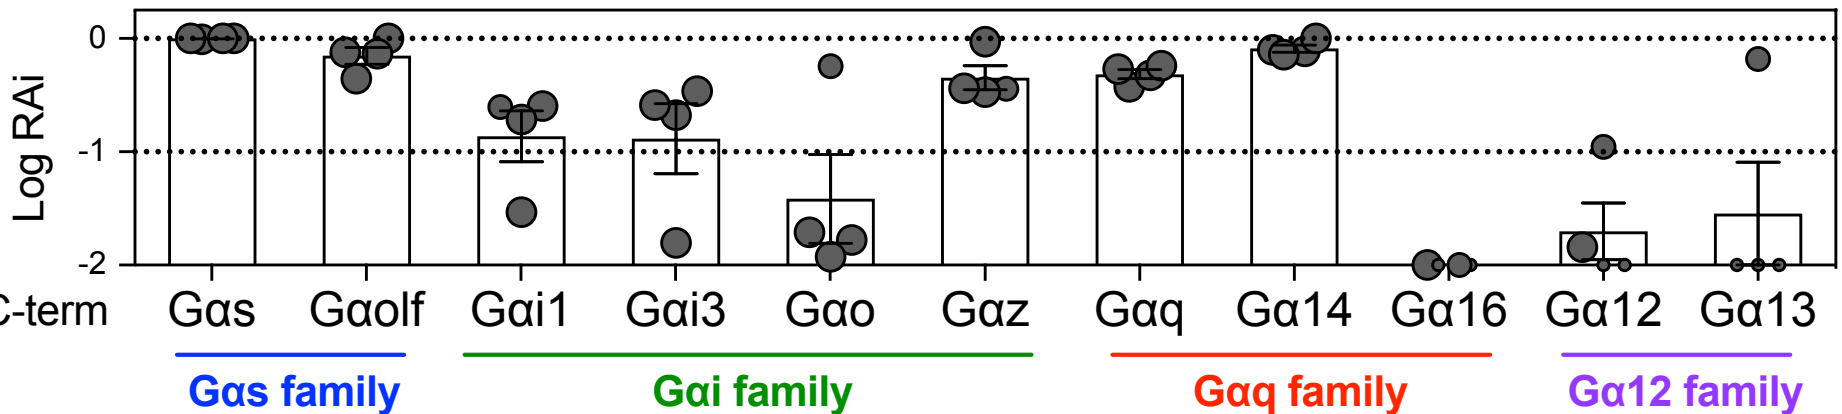

GPCR gene symbol: *DRD2*

GPCR name: D2

Tested ligand: Dopamine

### C-terminal chimera co-expression

#### Gas family

#### Gai family

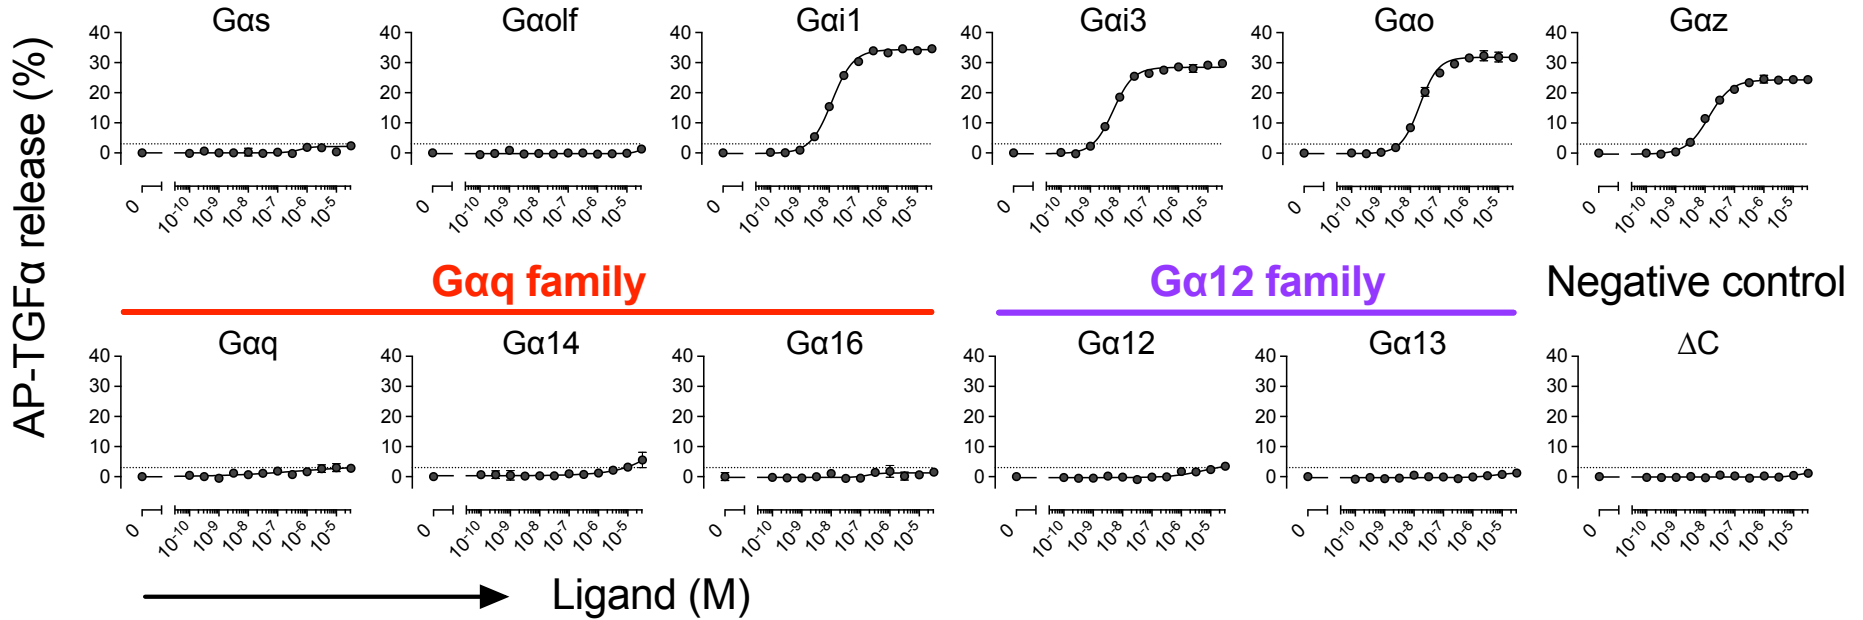

$E_{max}$  (%AP-TGFα release)    ● <3%    ● 3-5%    ● 5-10%    ● >10%

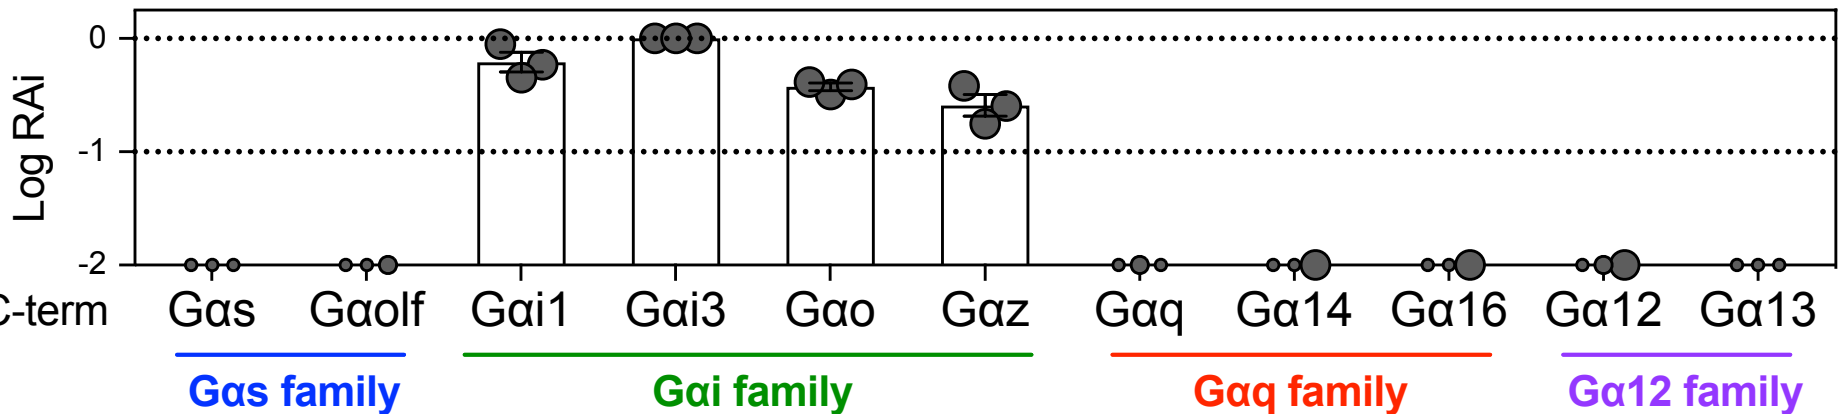

GPCR gene symbol: *DRD3*

GPCR name: D3

Tested ligand: Dopamine

### C-terminal chimera co-expression

#### Gas family

#### Gai family

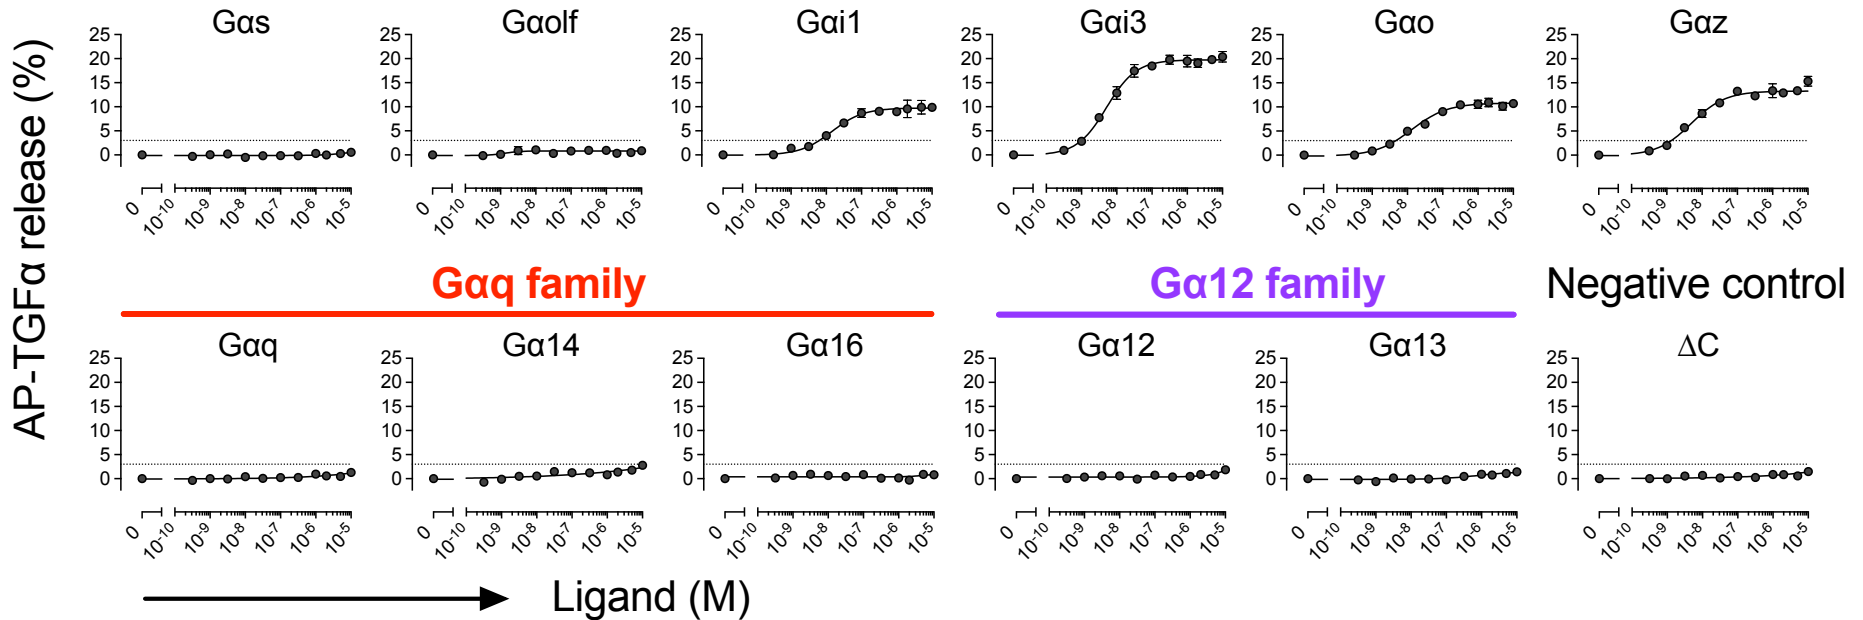

$E_{max}$  (%AP-TGFα release)    ● <3%    ● 3-5%    ● 5-10%    ● >10%

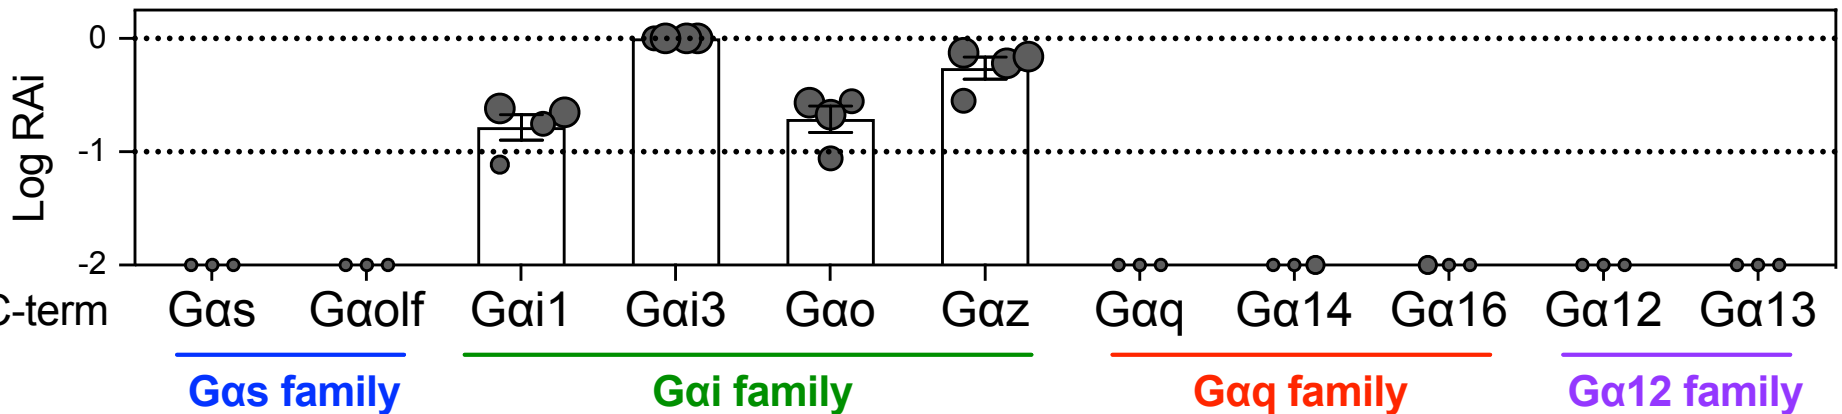

GPCR gene symbol: *DRD4*

GPCR name: D4

Tested ligand: Dopamine

### C-terminal chimera co-expression

#### Gas family

#### Gai family

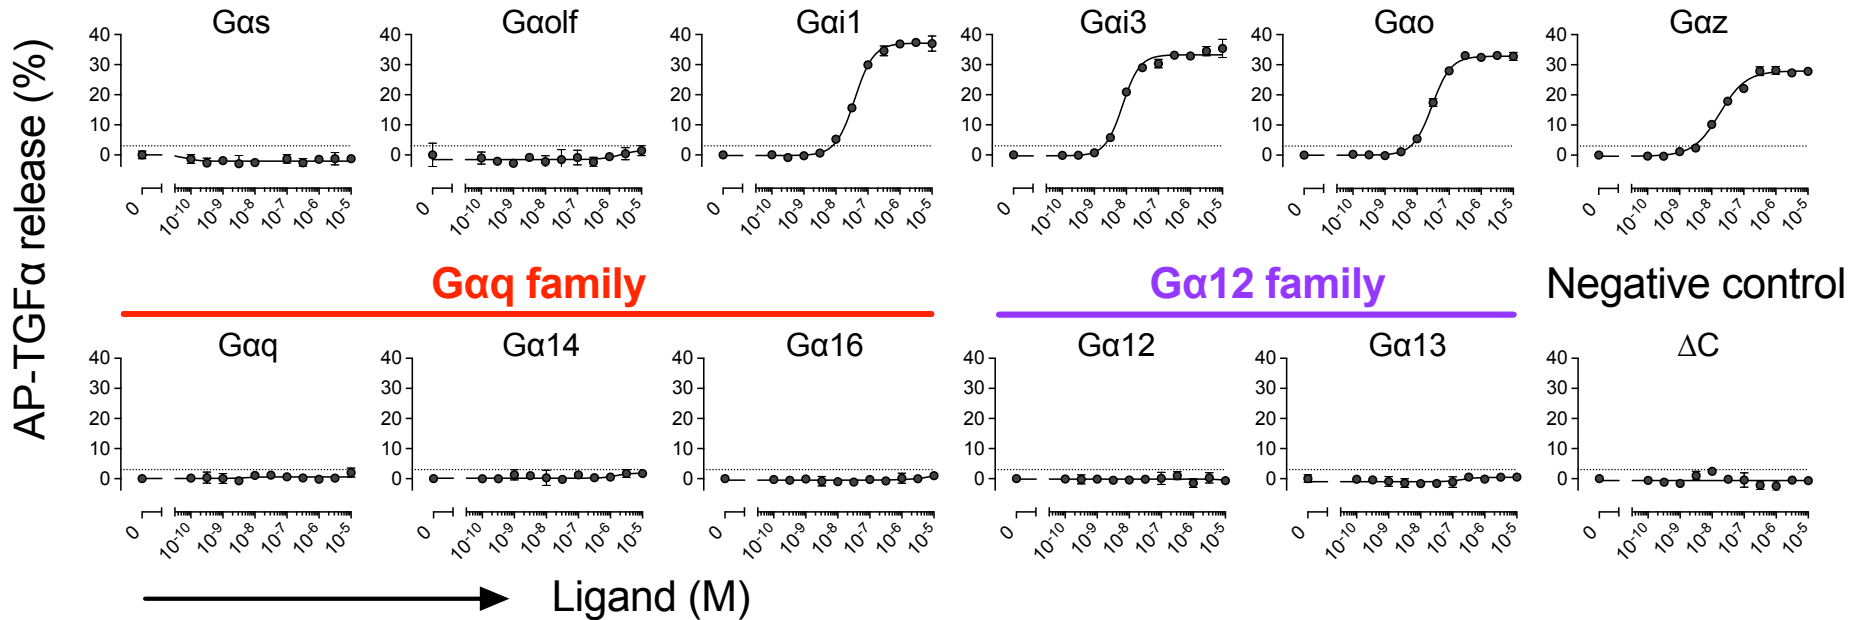

$E_{max}$  (%AP-TGFα release)    ● <3%    ● 3-5%    ● 5-10%    ● >10%

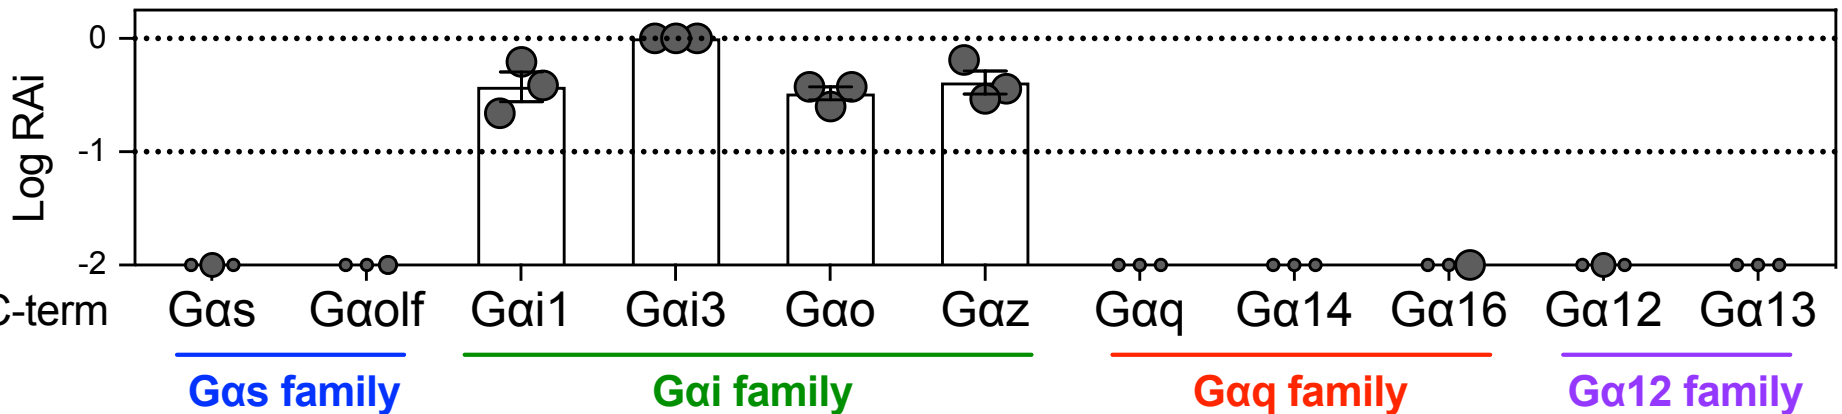

GPCR gene symbol: *DRD5*

GPCR name: D5

Tested ligand: Dopamine

### C-terminal chimera co-expression

#### Gas family

#### Gai family

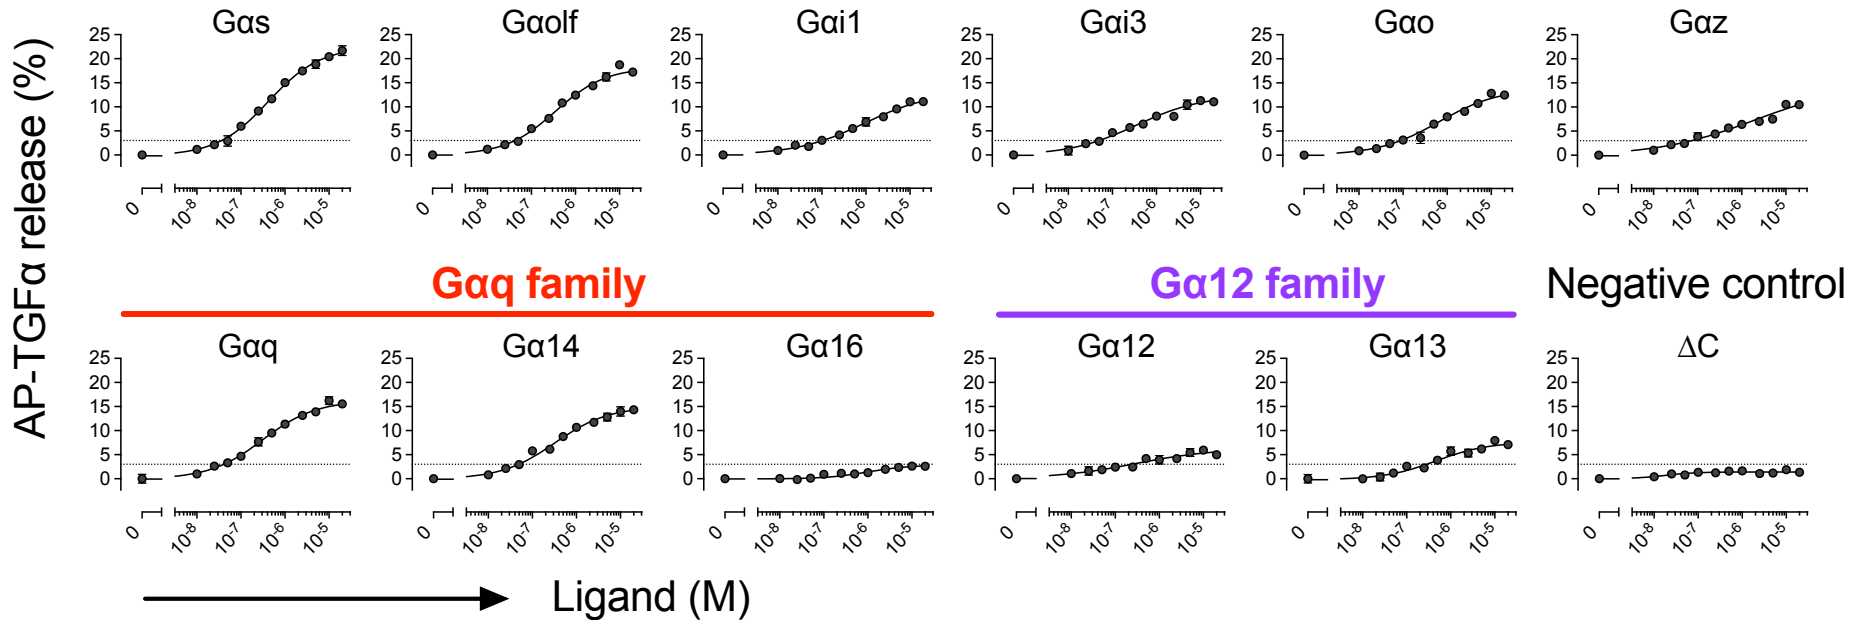

$E_{max}$  (%AP-TGFα release)

● <3%   ● 3-5%   ● 5-10%   ● >10%

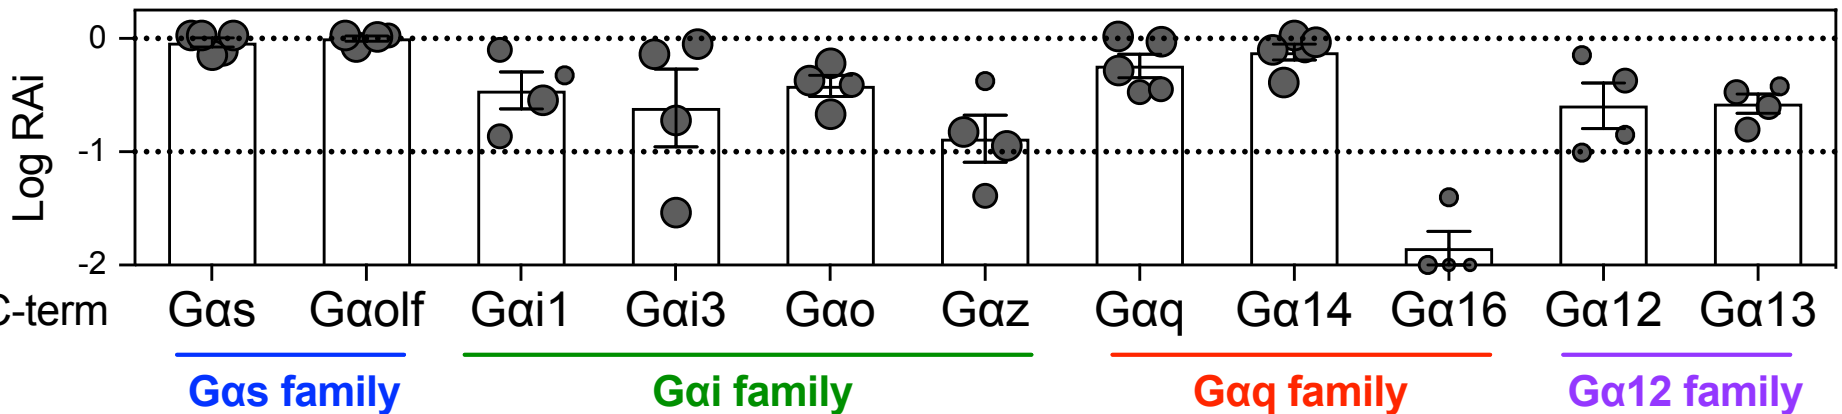

GPCR gene symbol: *EDNRA*

GPCR name: ETA

Tested ligand: Endothelin-1

### C-terminal chimera co-expression

#### Gas family

#### Gai family

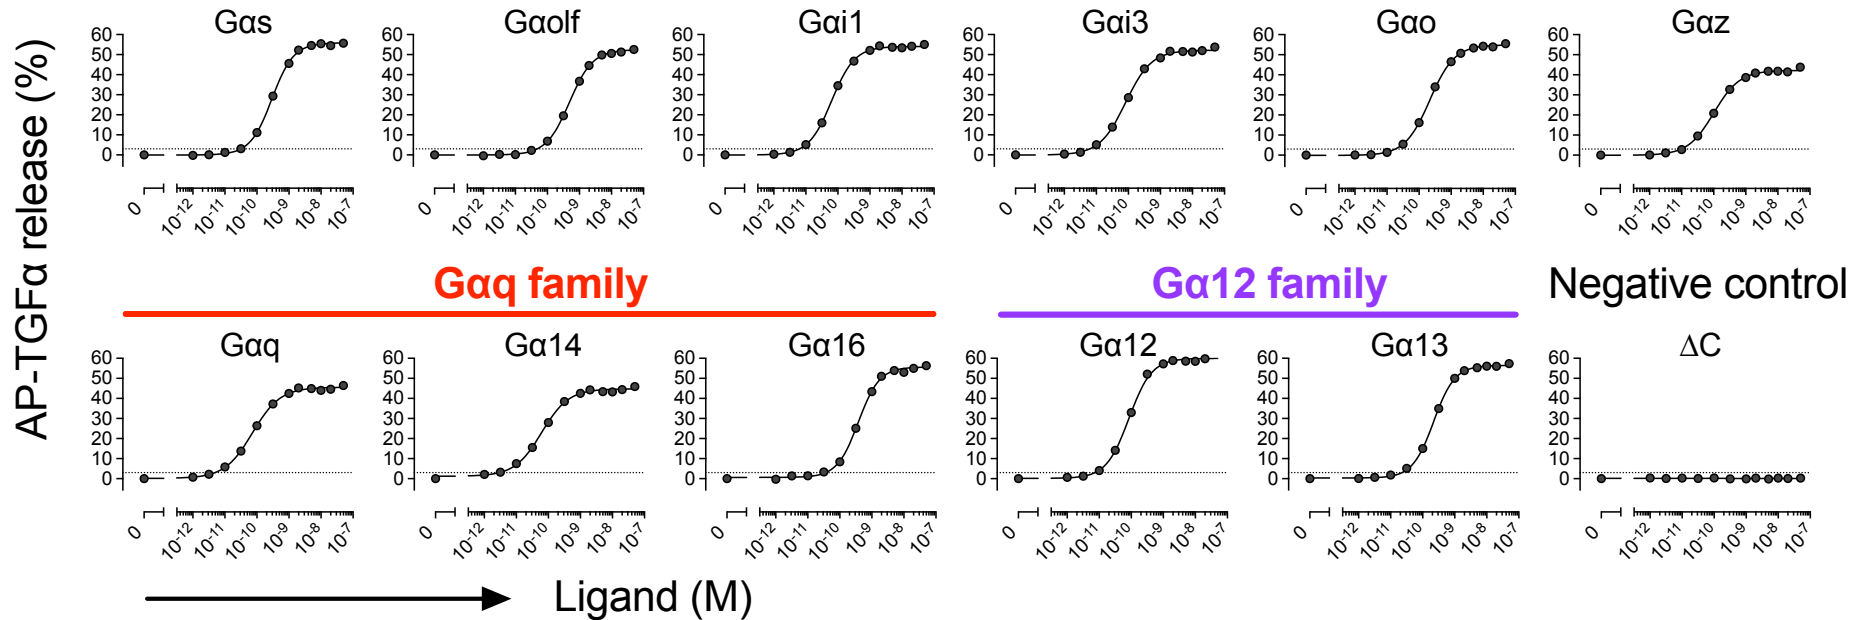

$E_{max}$  (%AP-TGFα release)

● <3%   ● 3-5%   ● 5-10%   ● >10%

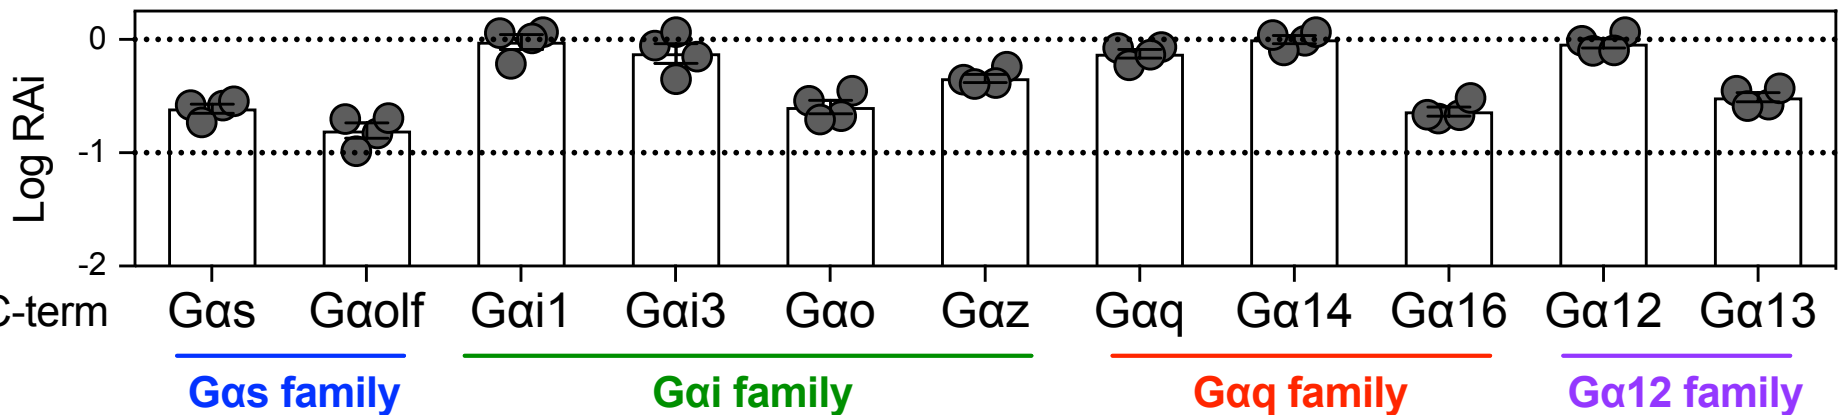

GPCR gene symbol: *EDNRB*

GPCR name: ETB

Tested ligand: Endothelin-1

### C-terminal chimera co-expression

#### Gas family

#### Gai family

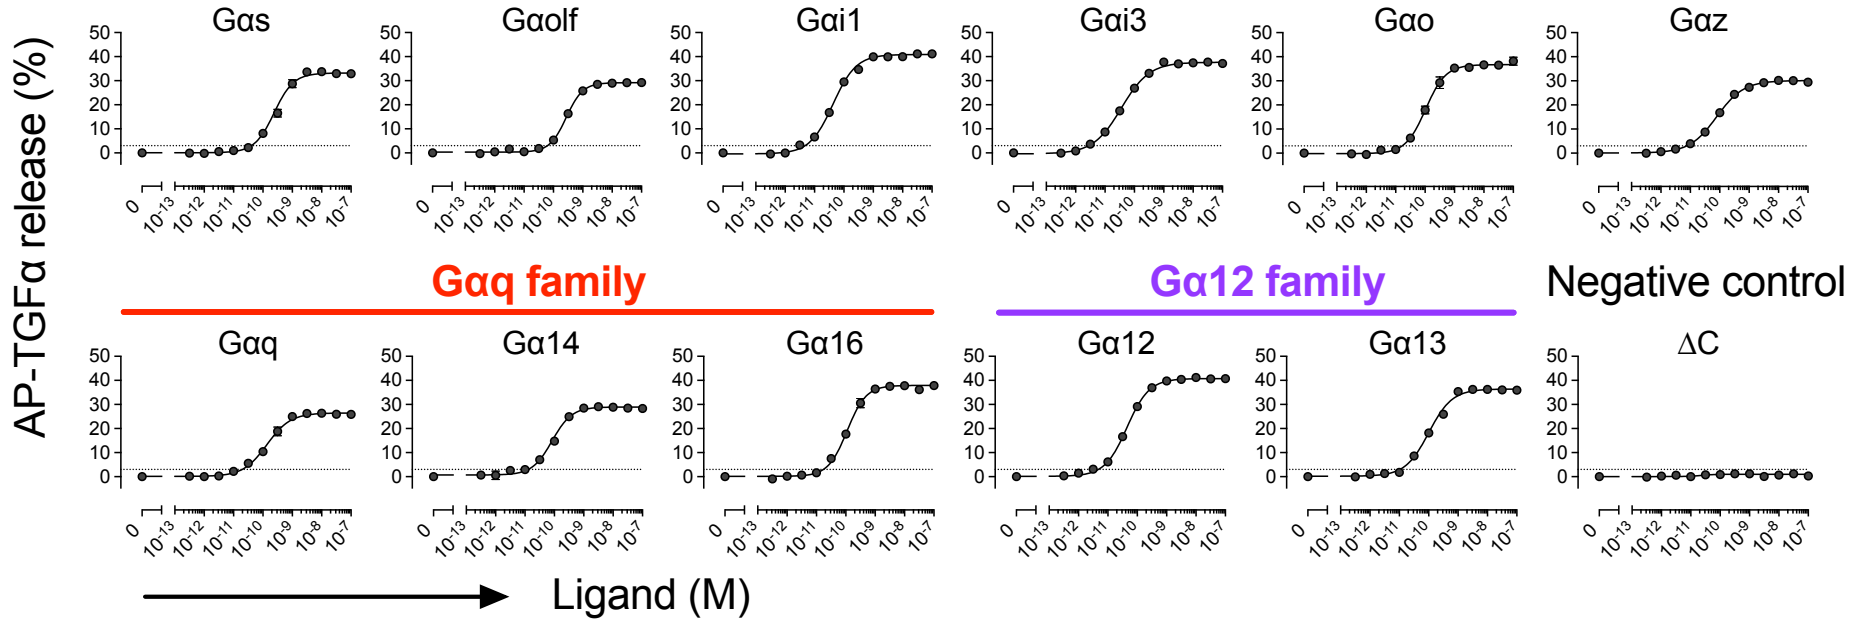

$E_{max}$  (%AP-TGFα release)    ● <3%    ● 3-5%    ● 5-10%    ● >10%

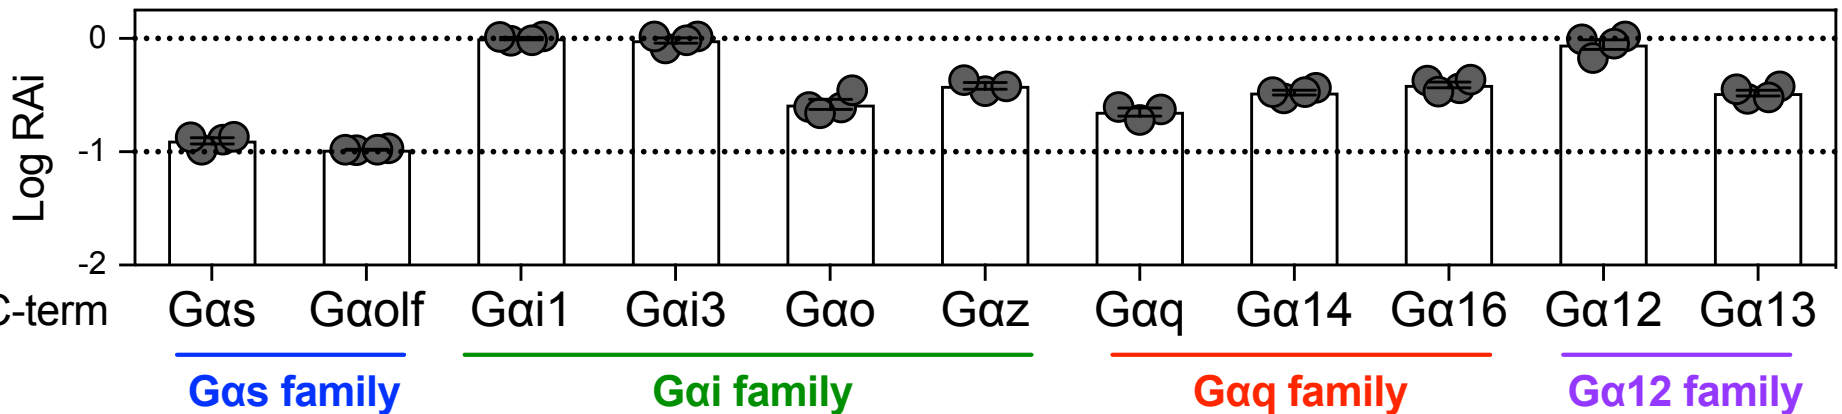

GPCR gene symbol: *F2R*

GPCR name: PAR1

Tested ligand: PAR1-peptide (TFLLR-NH2)

### C-terminal chimera co-expression

#### Gas family

#### Gai family

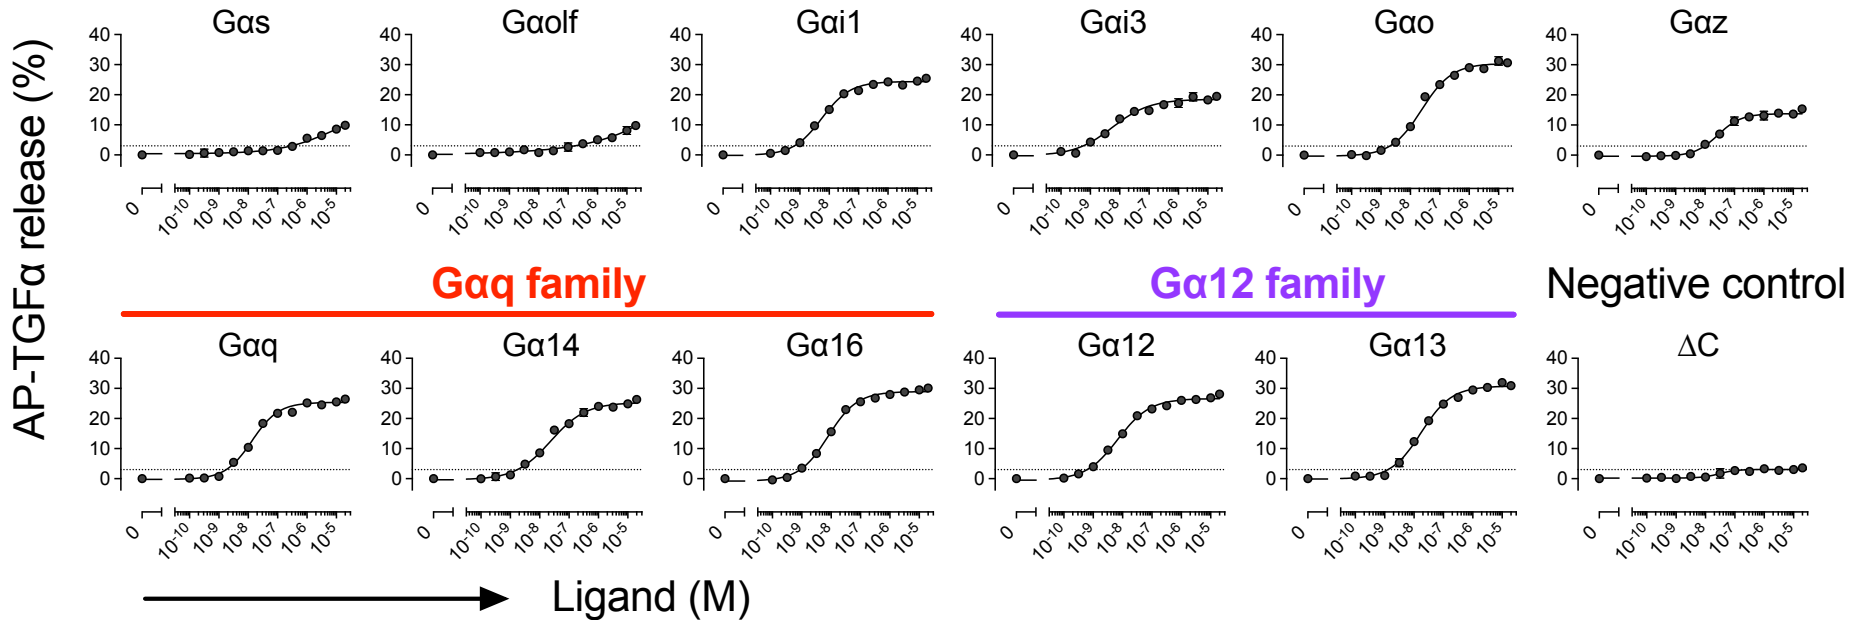

$E_{max}$  (%AP-TGFα release)

● <3%   ● 3-5%   ● 5-10%   ● >10%

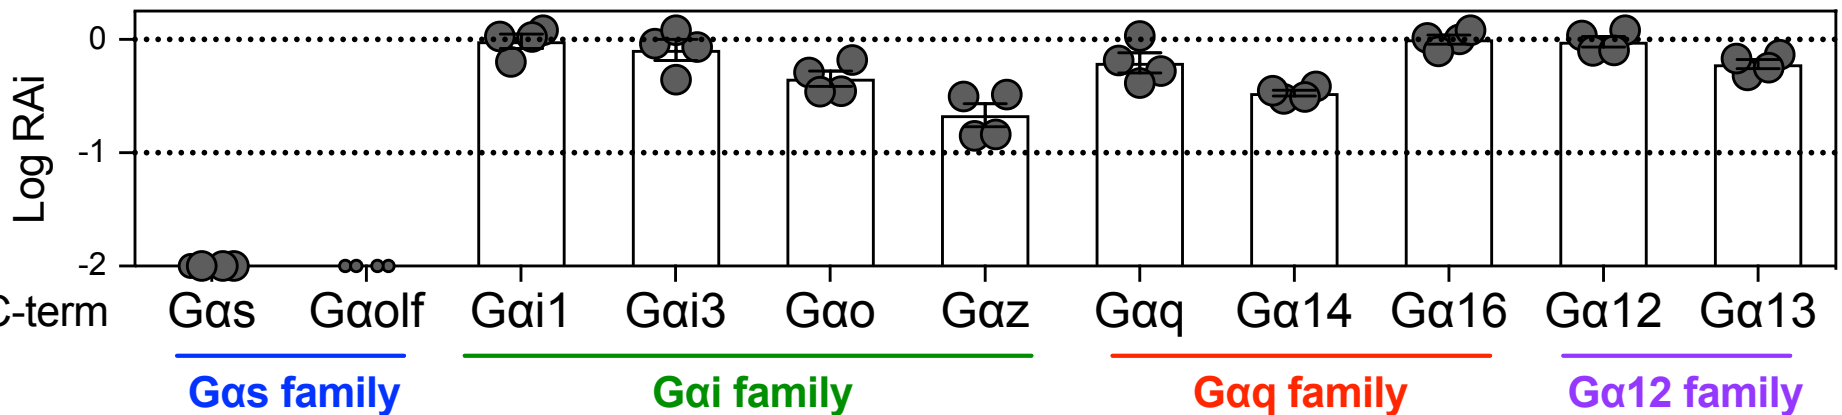



GPCR gene symbol: *F2RL2*

GPCR name: PAR2

Tested ligand: PAR2-peptide (SLIGRL-NH2)

### C-terminal chimera co-expression

#### Gas family

#### Gai family

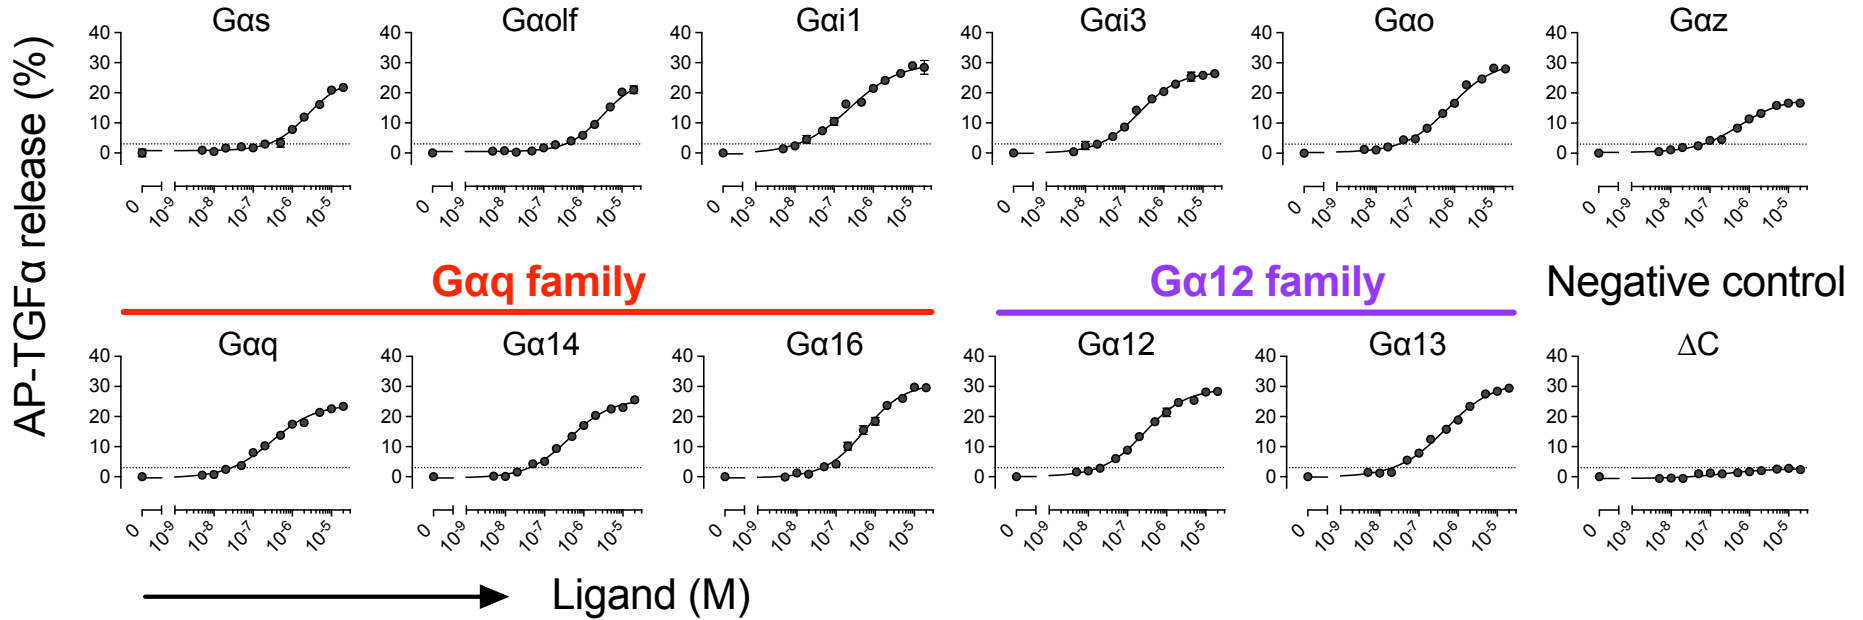

$E_{max}$  (%AP-TGFα release)

● <3%   ● 3-5%   ● 5-10%   ● >10%

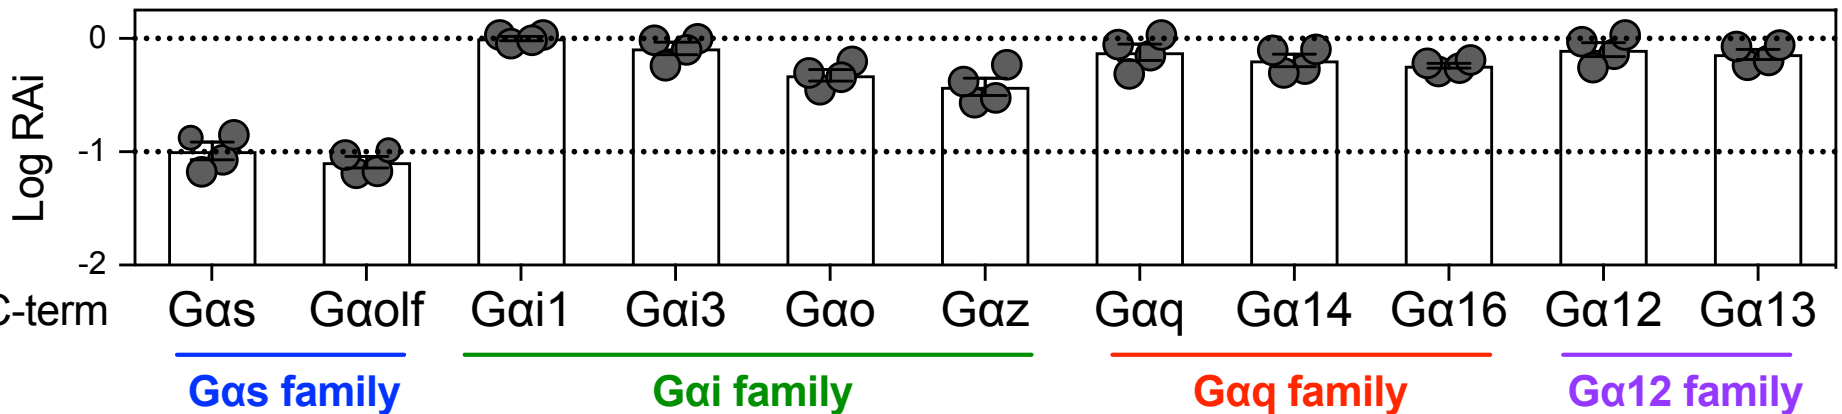

GPCR gene symbol: *F2RL2*

GPCR name: PAR3

Tested ligand: Thrombin

### C-terminal chimera co-expression

#### Gas family

#### Gai family

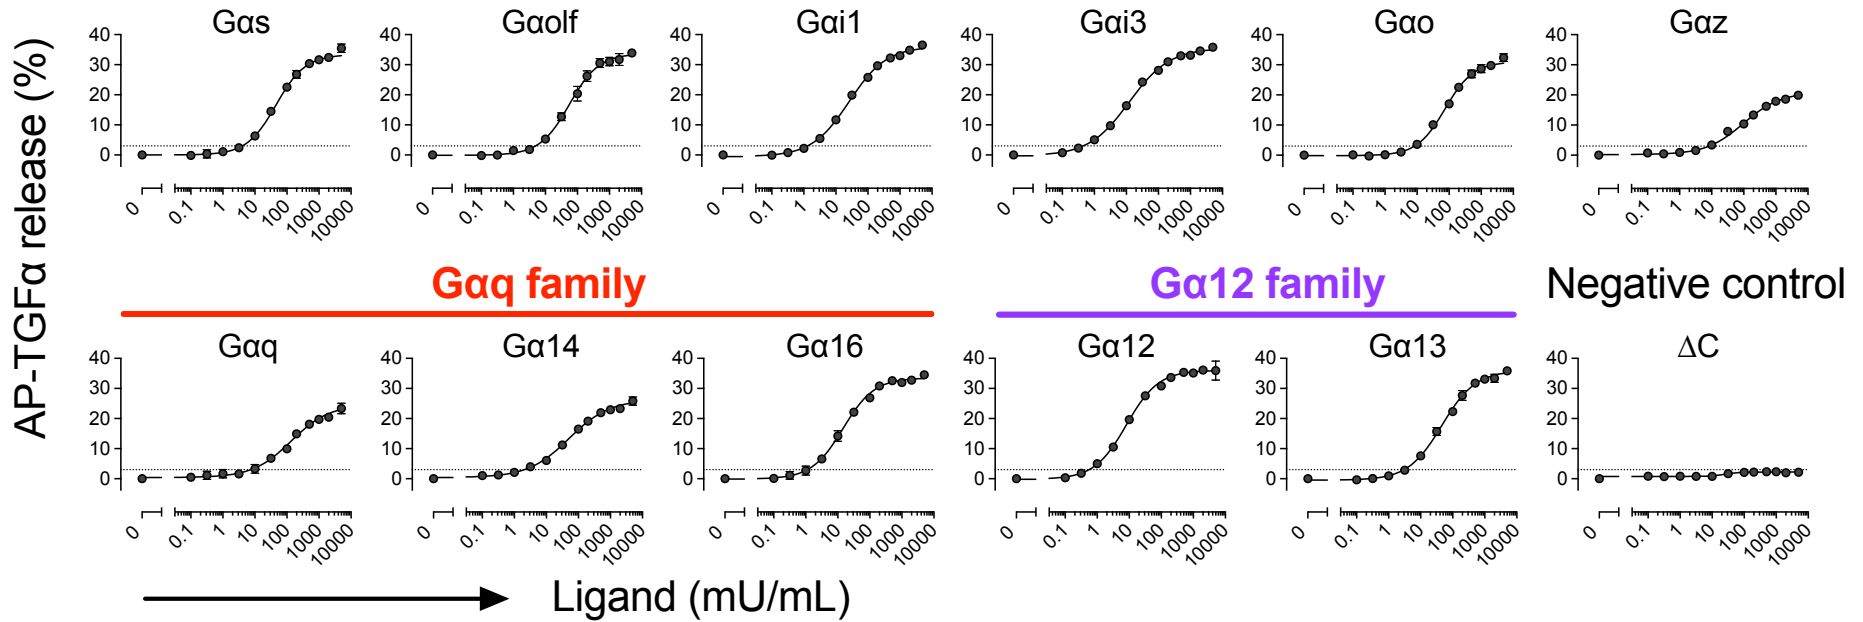

$E_{max}$  (%AP-TGFα release)    ● <3%    ● 3-5%    ● 5-10%    ● >10%

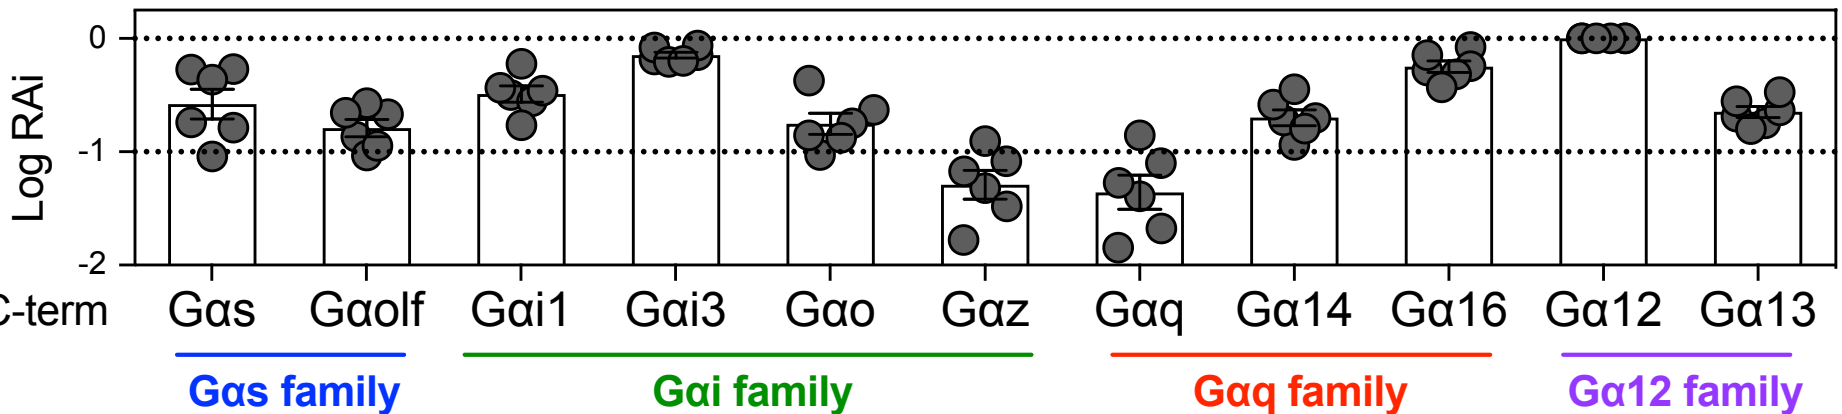

GPCR gene symbol: *F2RL3*

GPCR name: PAR4

Tested ligand: Thrombin

### C-terminal chimera co-expression

#### Gas family

#### Gai family

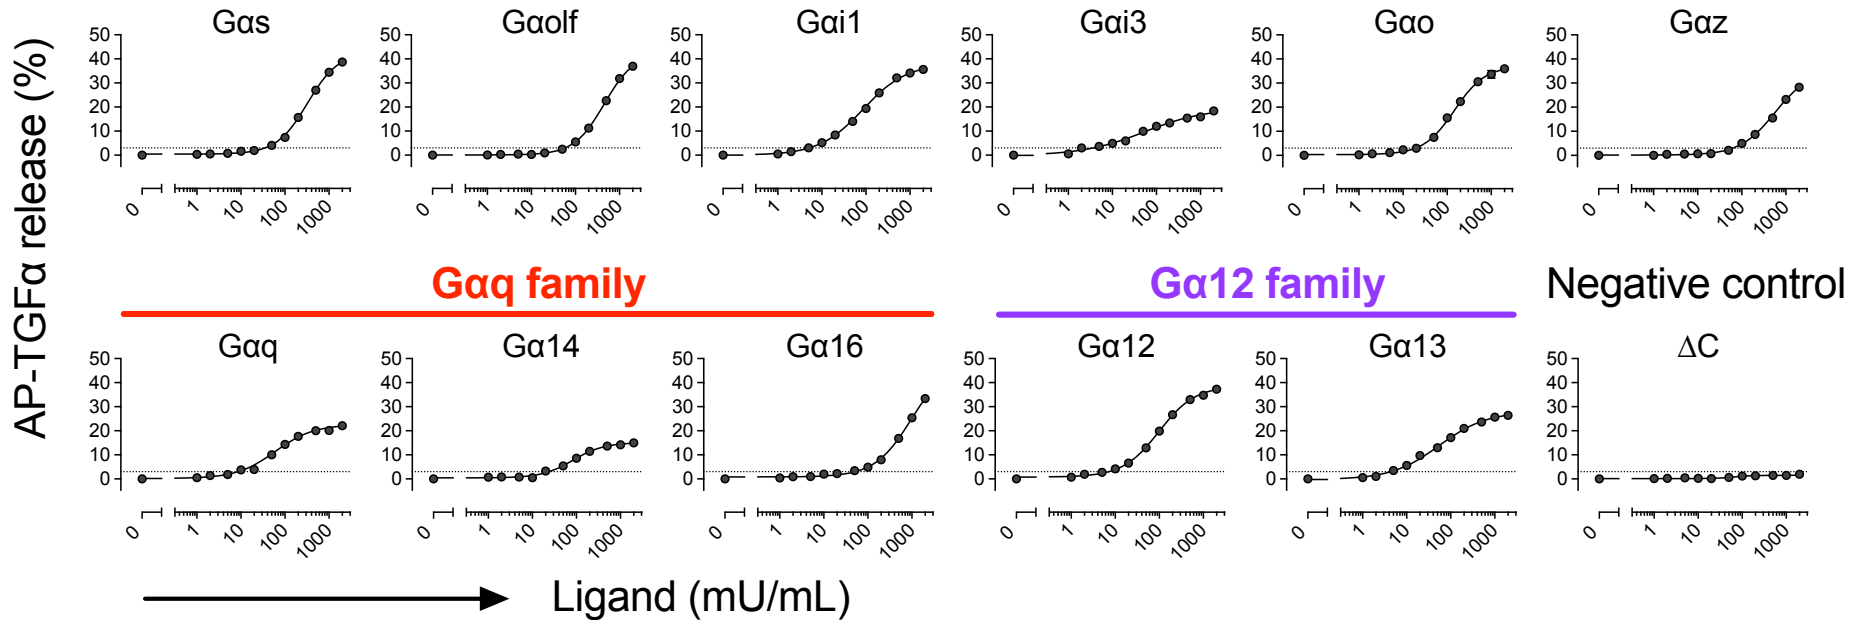

$E_{max}$  (%AP-TGFα release)

● <3%   ● 3-5%   ● 5-10%   ● >10%

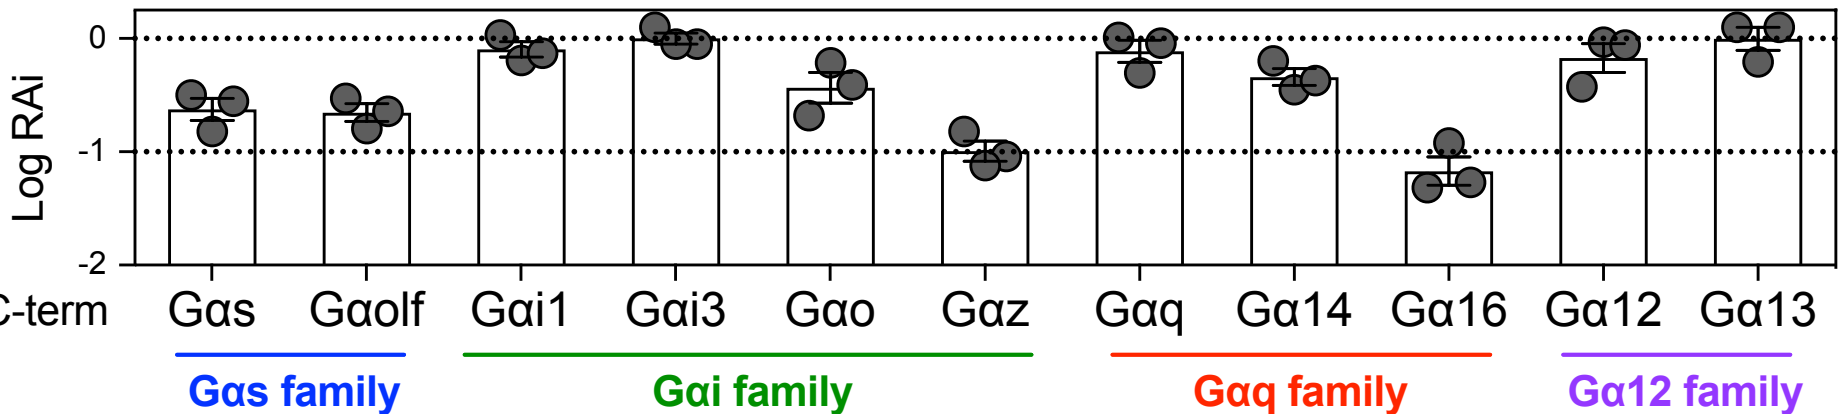

GPCR gene symbol: *FFAR1*

GPCR name: FFA1

Tested ligand: Palmitic acid

### C-terminal chimera co-expression

#### Gas family

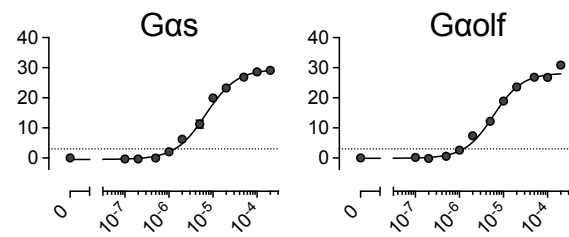

#### Gai family

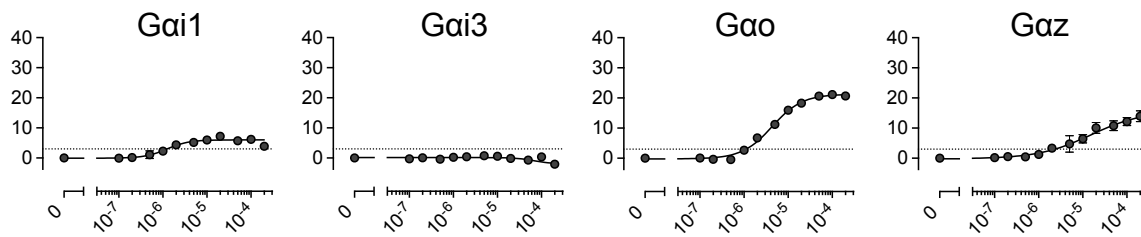

#### Gaq family

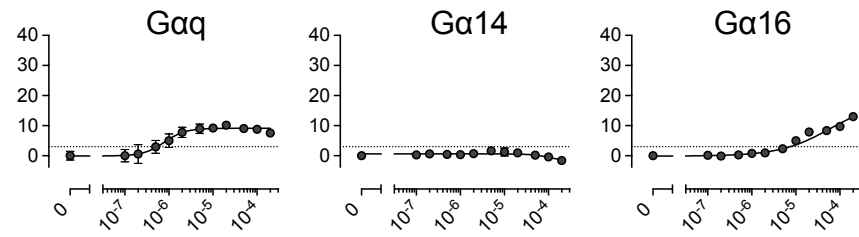

#### G $\alpha$ 12 family

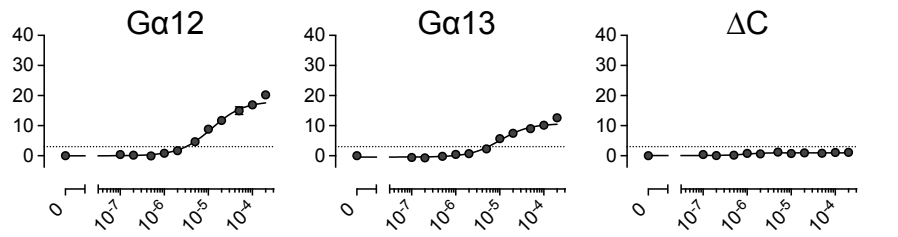

Ligand (M)

$E_{max}$  (%AP-TGF $\alpha$  release)

● <3%   ● 3-5%   ● 5-10%   ● >10%

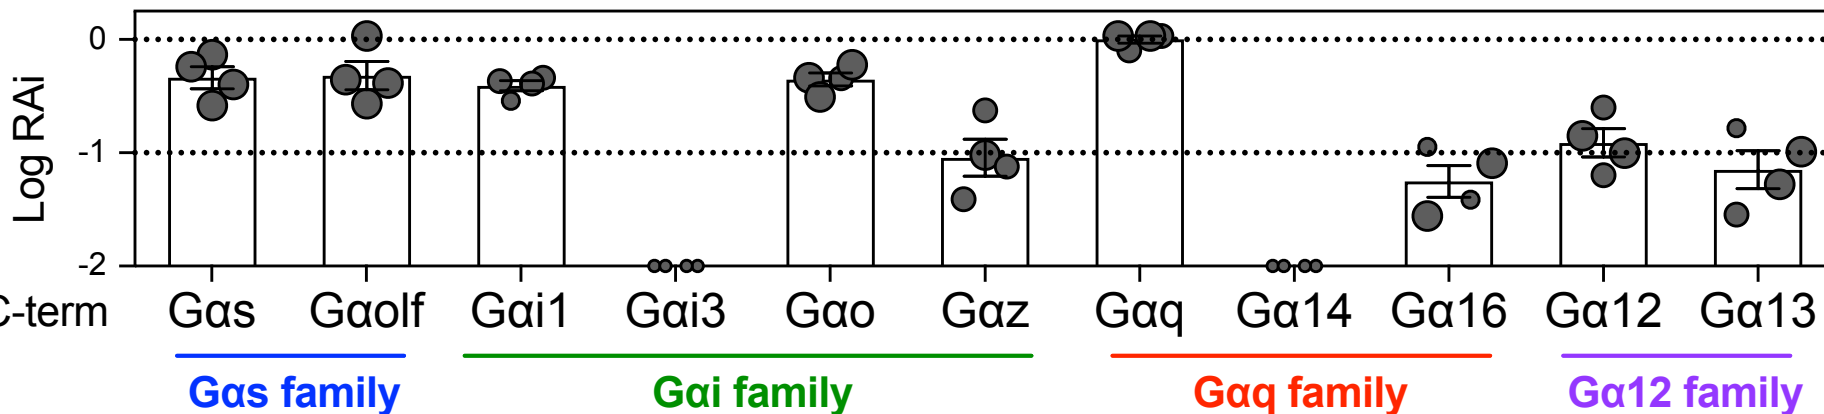

GPCR gene symbol: *FFAR2*

GPCR name: FFA2

Tested ligand: Propionic acid

### C-terminal chimera co-expression

#### Gas family

#### Gai family

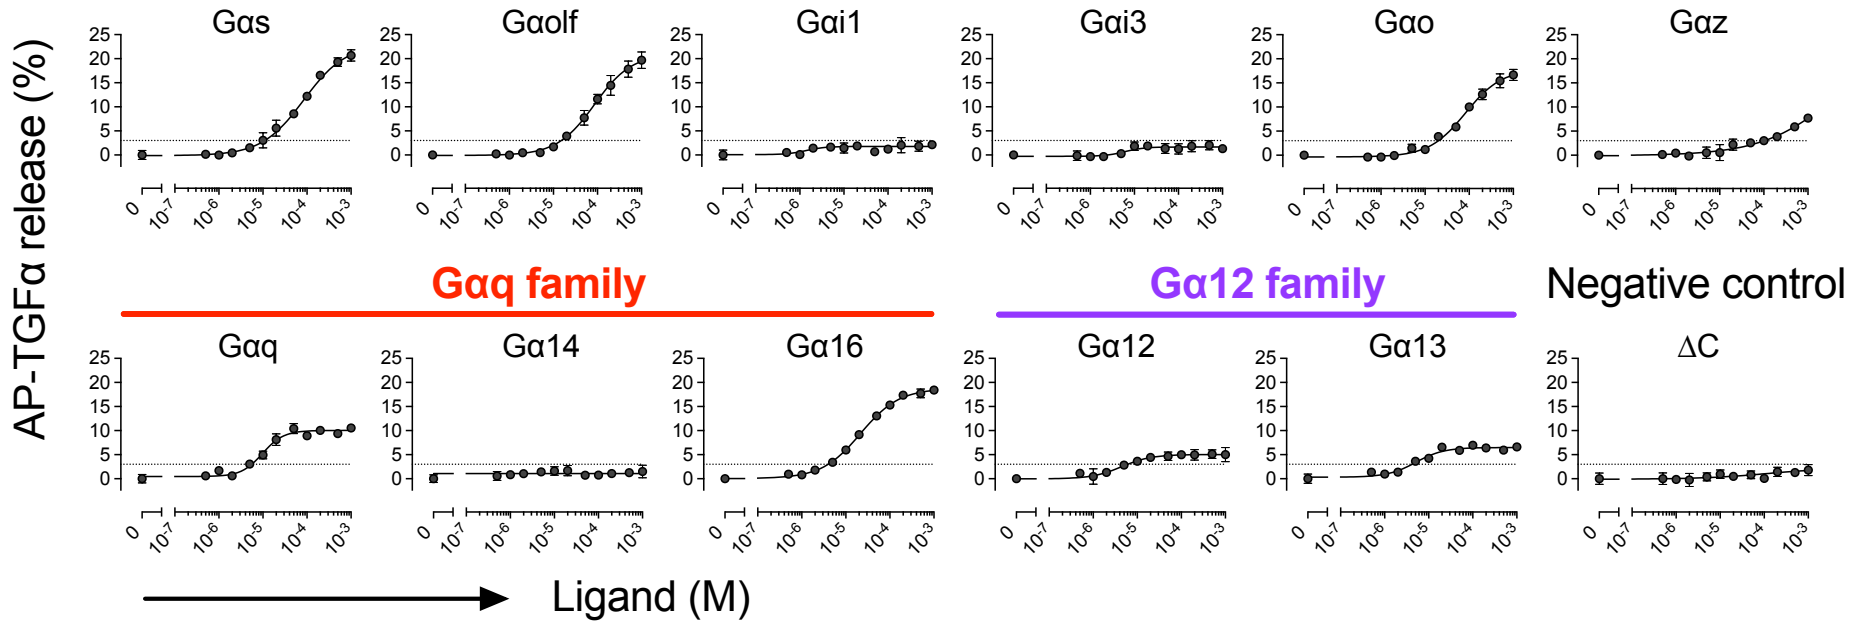

$E_{max}$  (%AP-TGFα release)    ● <3%    ● 3-5%    ● 5-10%    ● >10%

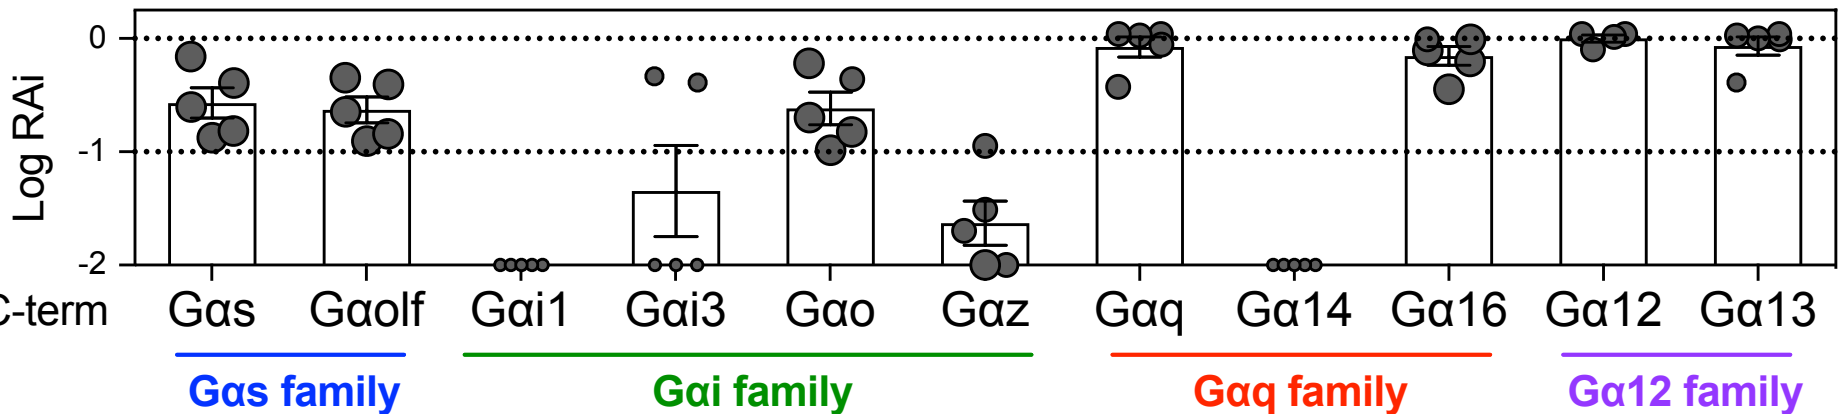

GPCR gene symbol: *FFAR3*

GPCR name: FFA3

Tested ligand: Propionic acid

### C-terminal chimera co-expression

#### Gas family

#### Gai family

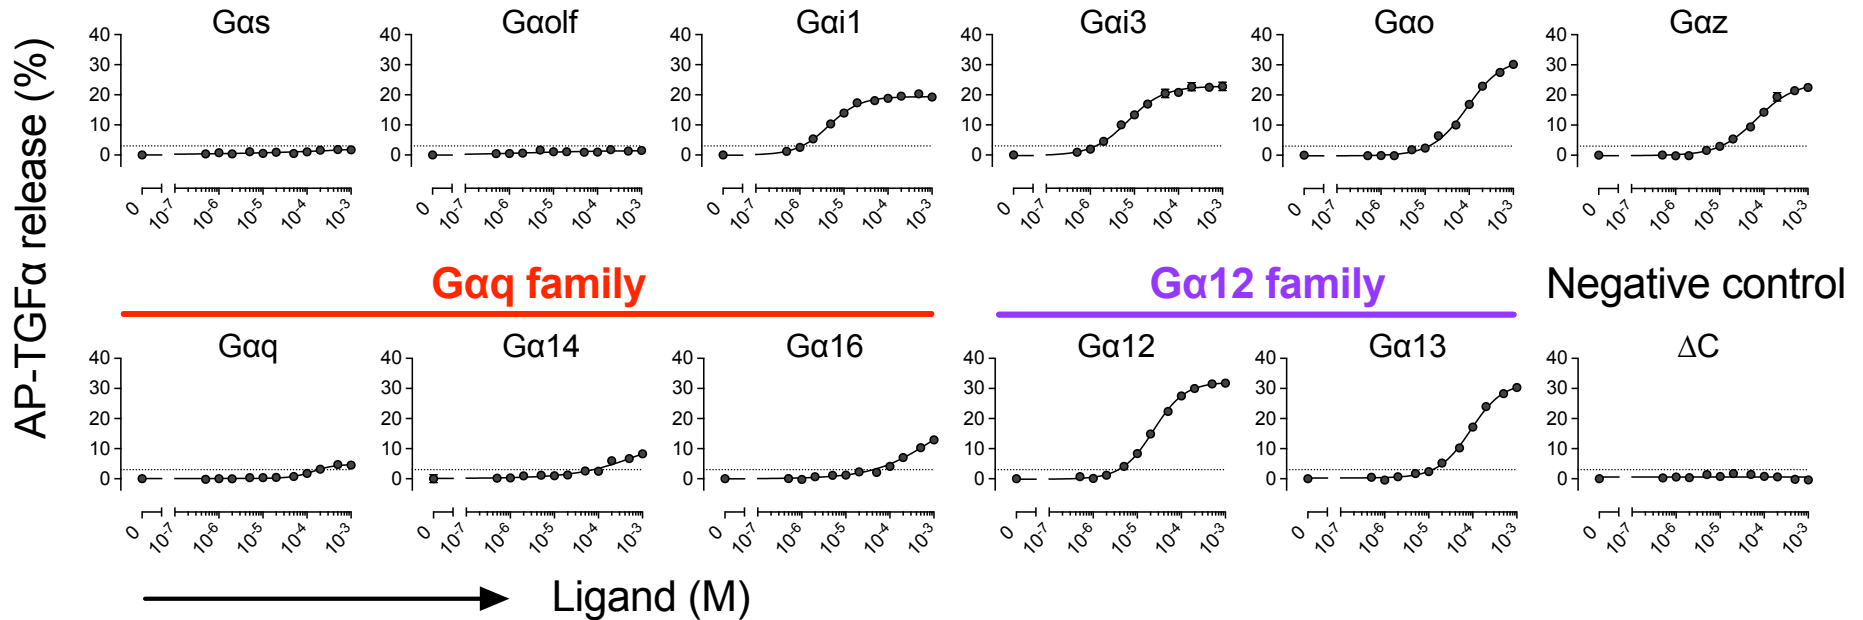

$E_{max}$  (%AP-TGFα release)    ● <3%    ● 3-5%    ● 5-10%    ● >10%

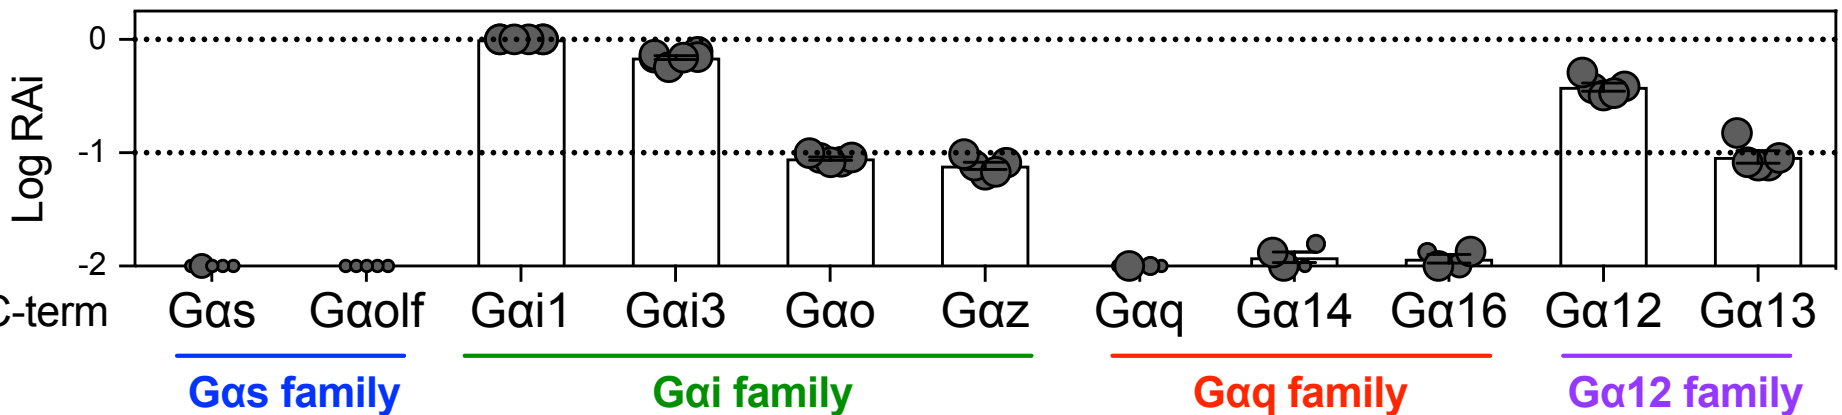

GPCR gene symbol: *FFAR4*

GPCR name: FFA4

Tested ligand: TUG 891

### C-terminal chimera co-expression

#### Gas family

#### Gai family

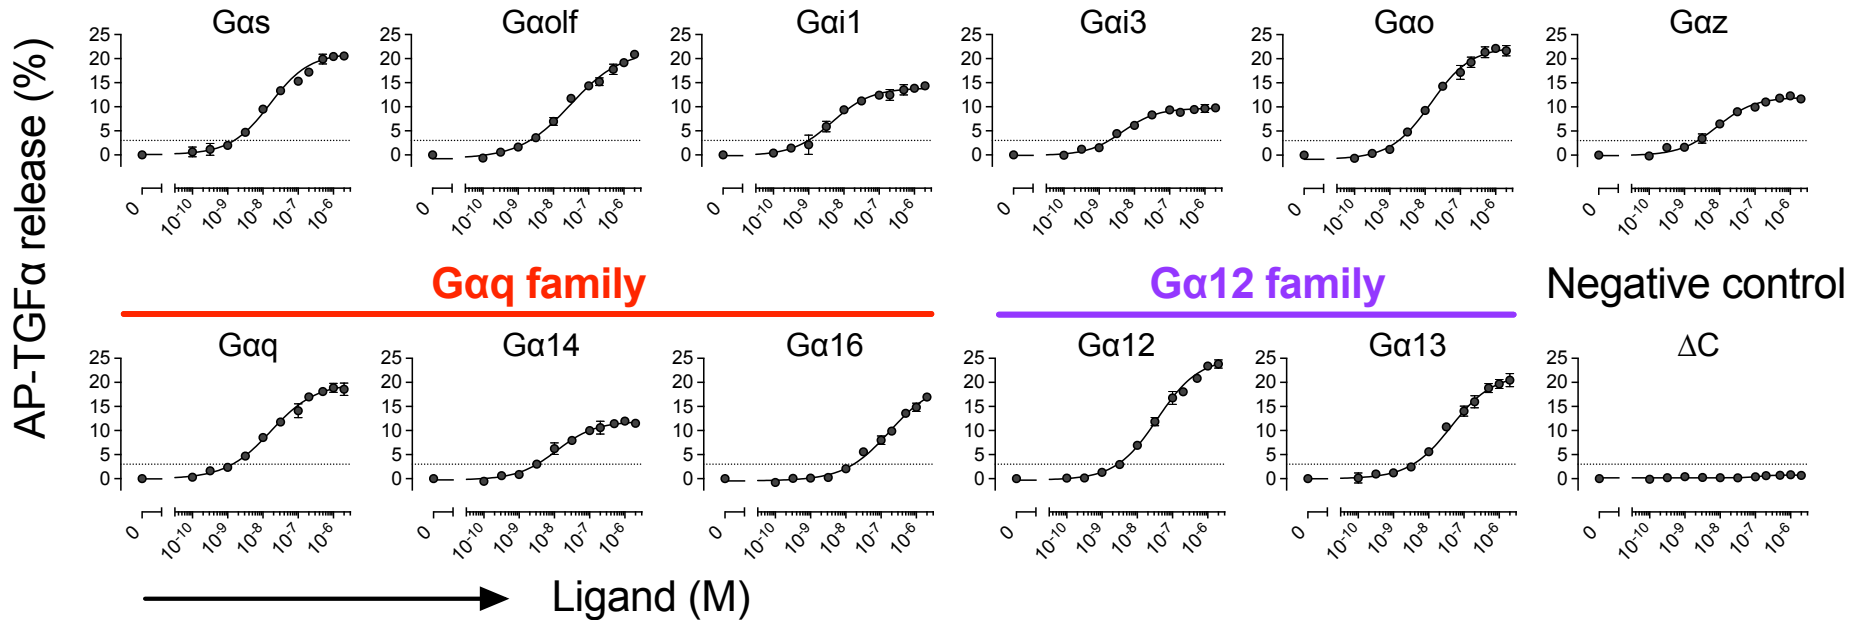

$E_{max}$  (%AP-TGFα release)    ● <3%    ● 3-5%    ● 5-10%    ● >10%

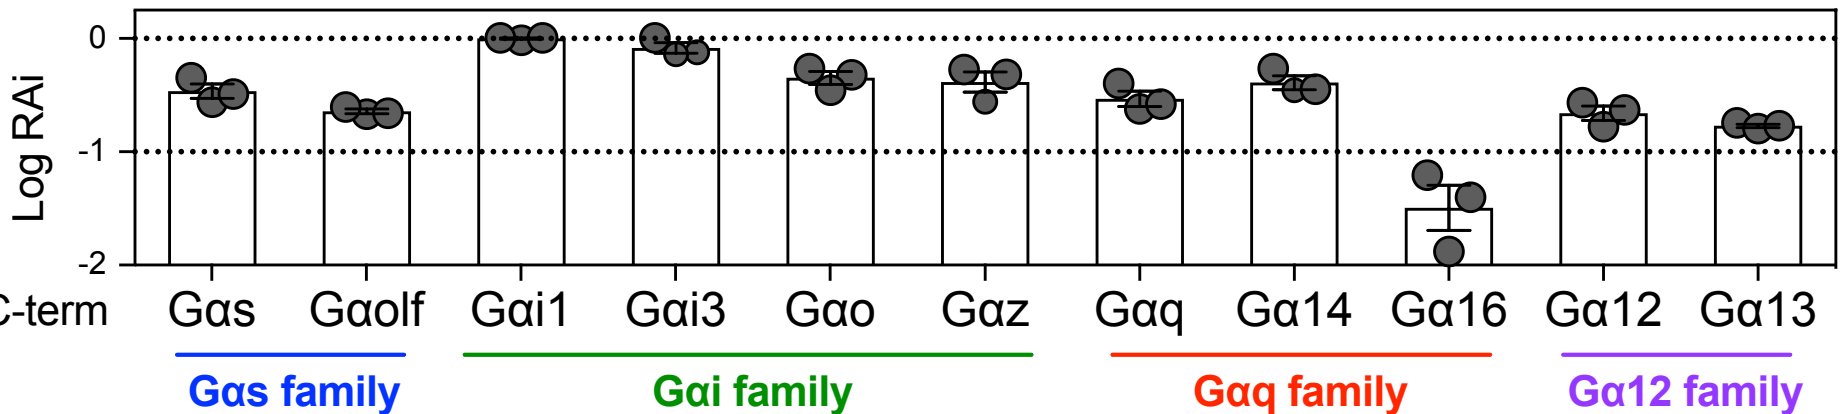

GPCR gene symbol: *FPR1*

GPCR name: FPR1

Tested ligand: N-Formylmethionine-leucyl-phenylalanine (fMLP)

### C-terminal chimera co-expression

#### Gas family

#### Gai family

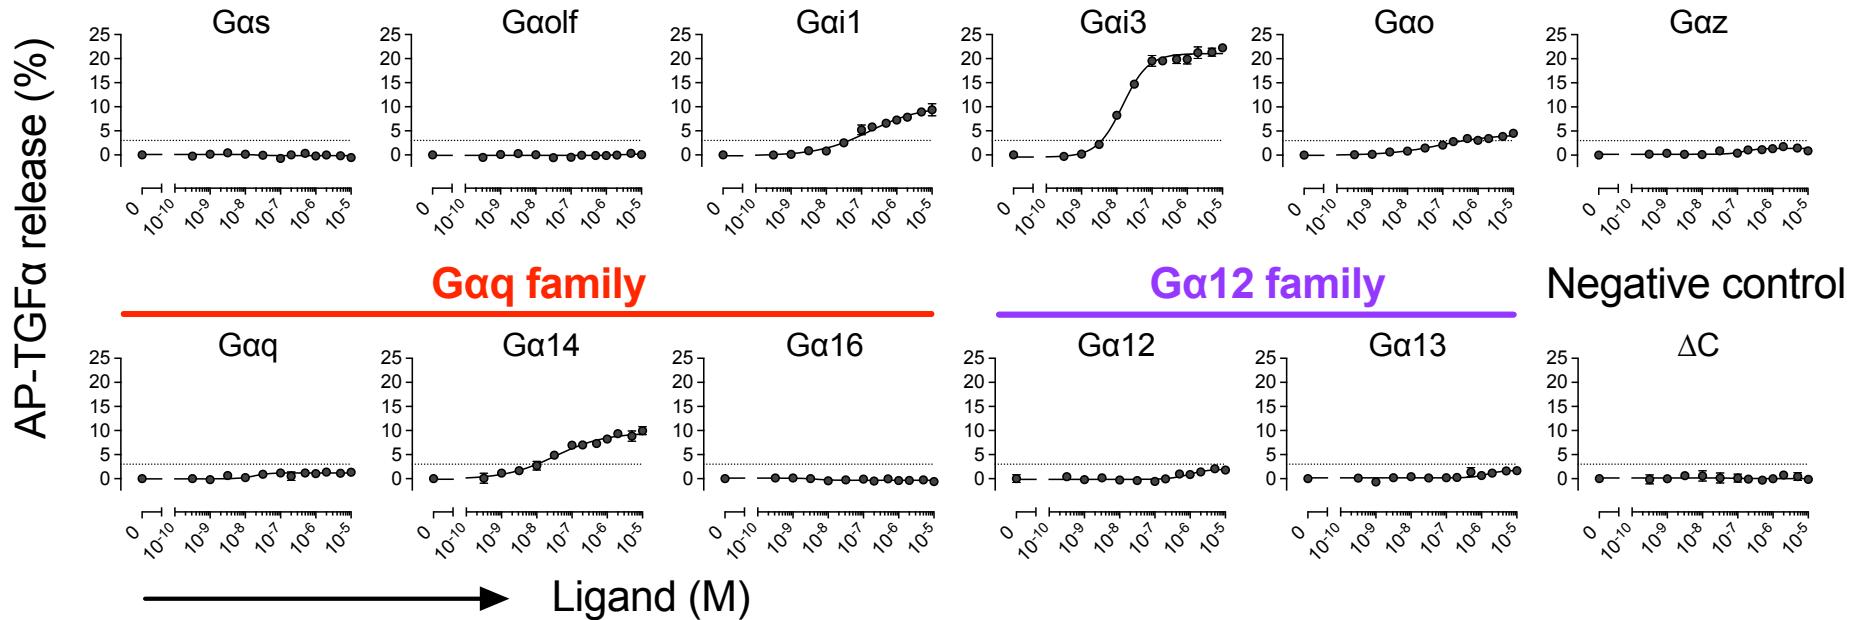

$E_{max}$  (%AP-TGFα release)

● <3%   ● 3-5%   ● 5-10%   ● >10%

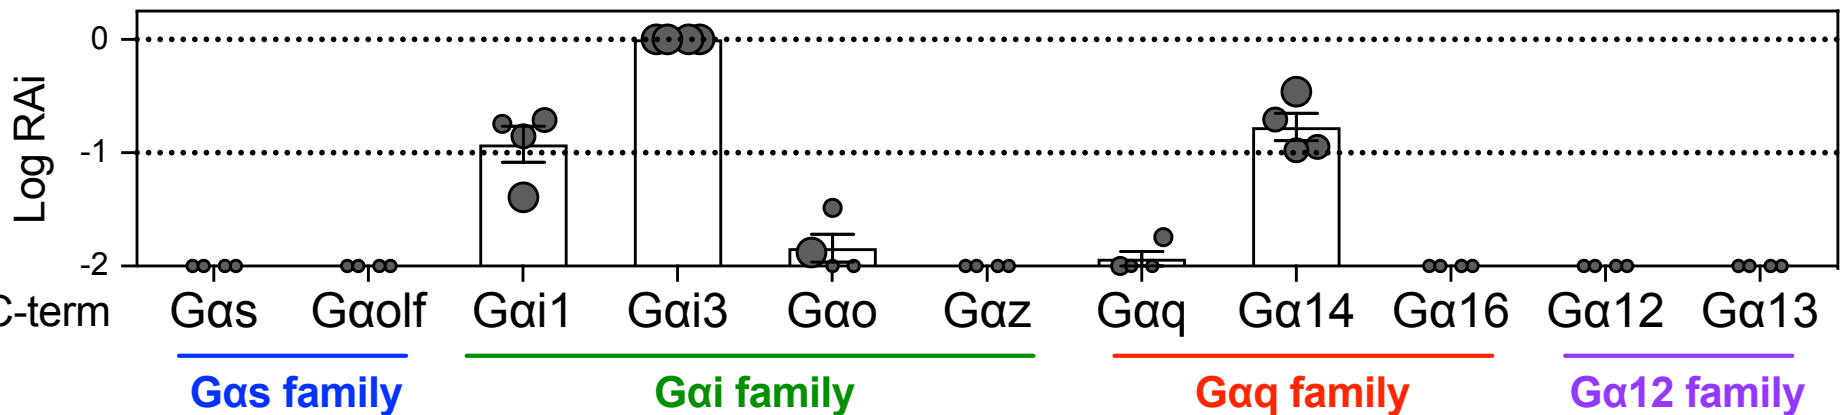



GPCR gene symbol: *FPR2*

GPCR name: FPR2

Tested ligand: N

### C-terminal chimera co-expression

#### Gas family

#### Gai family

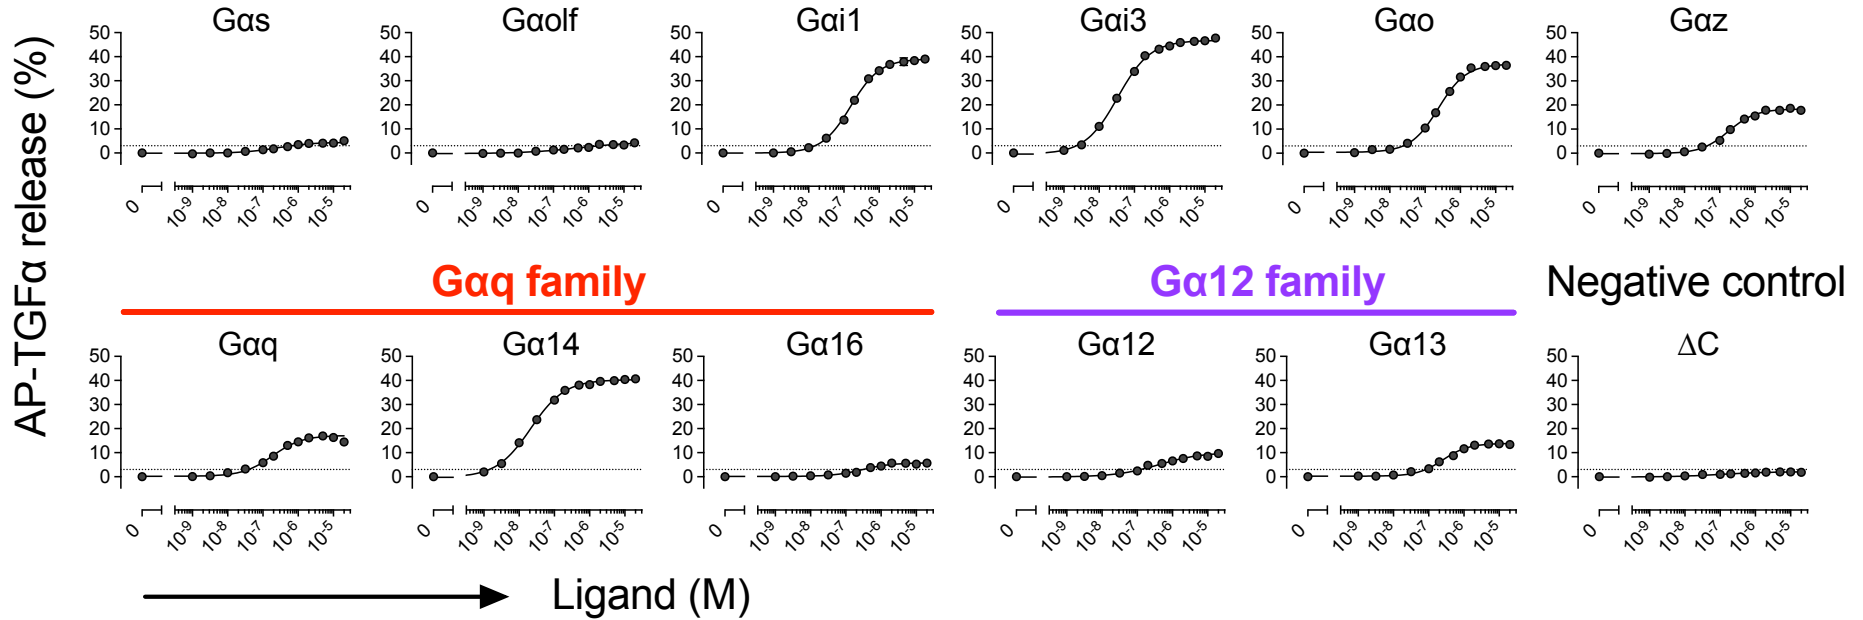

$E_{max}$  (%AP-TGF $\alpha$  release)    ● <3%    ● 3-5%    ● 5-10%    ● >10%

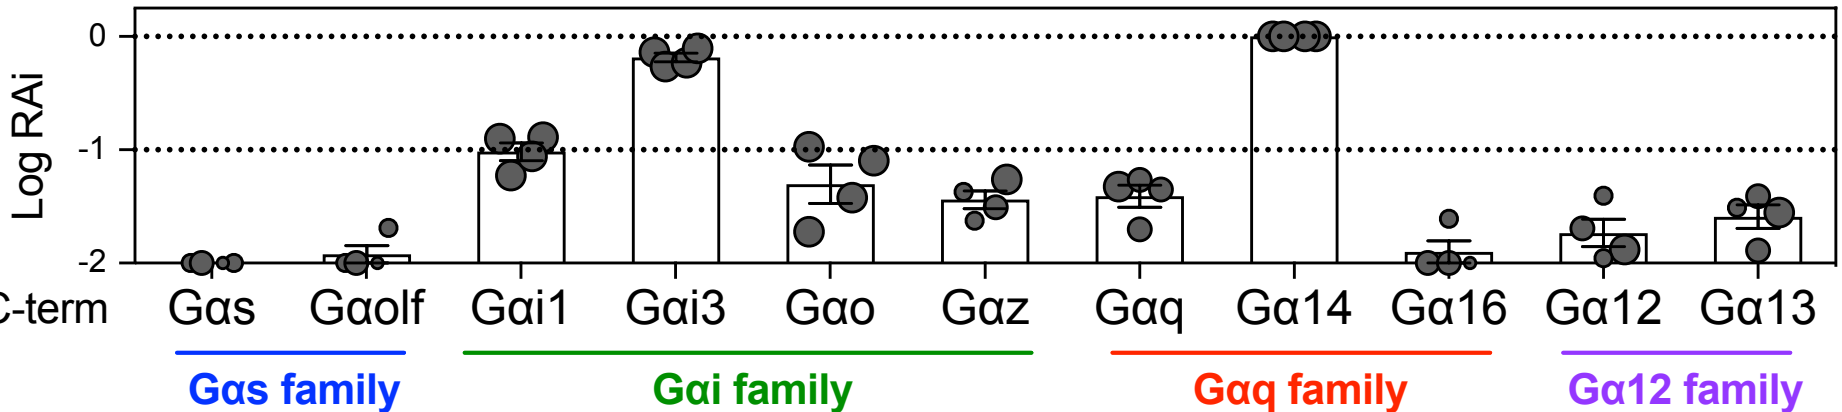

GPCR gene symbol: *GALR1*

GPCR name: GAL1

Tested ligand: Galanin

### C-terminal chimera co-expression

#### Gas family

#### Gai family

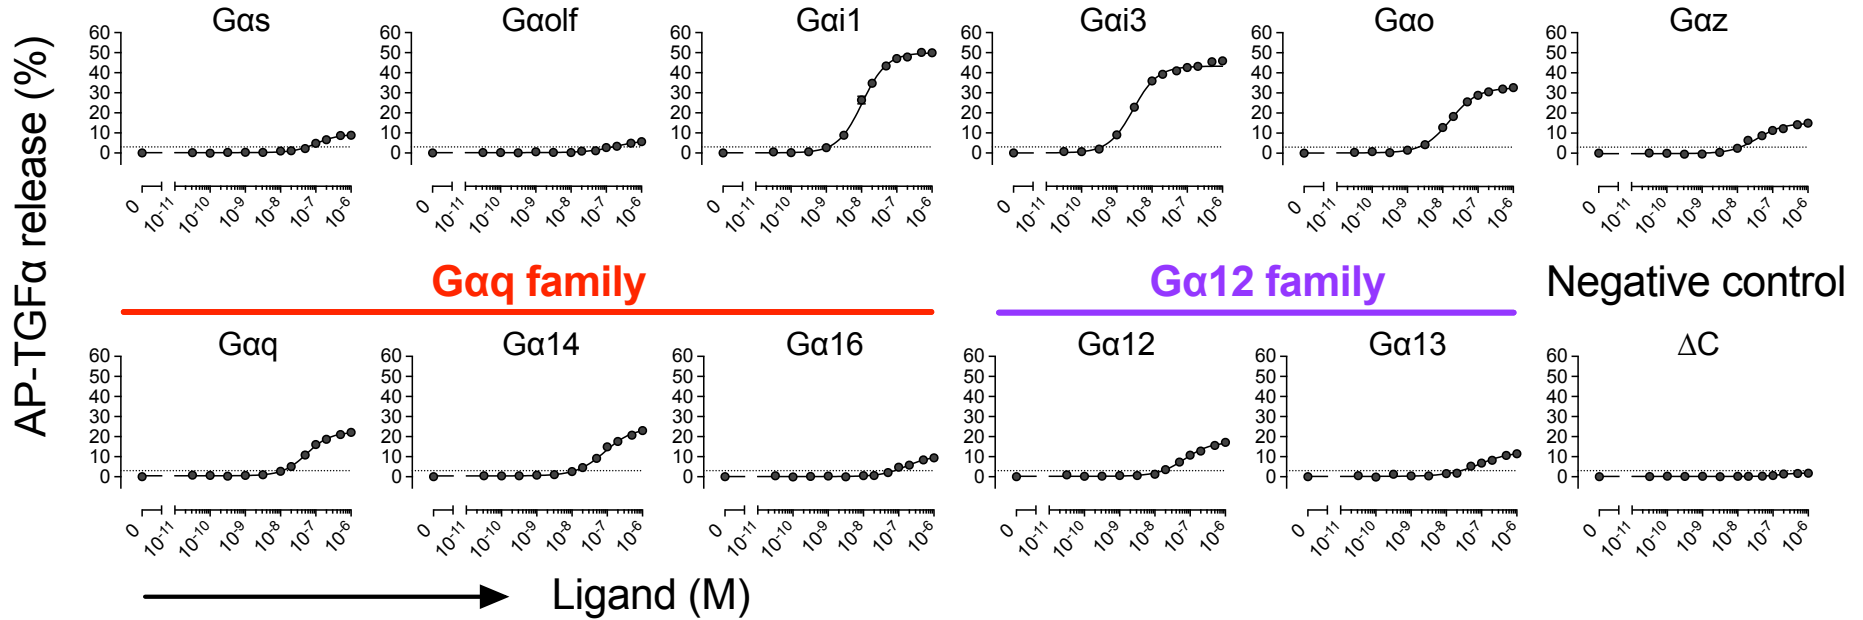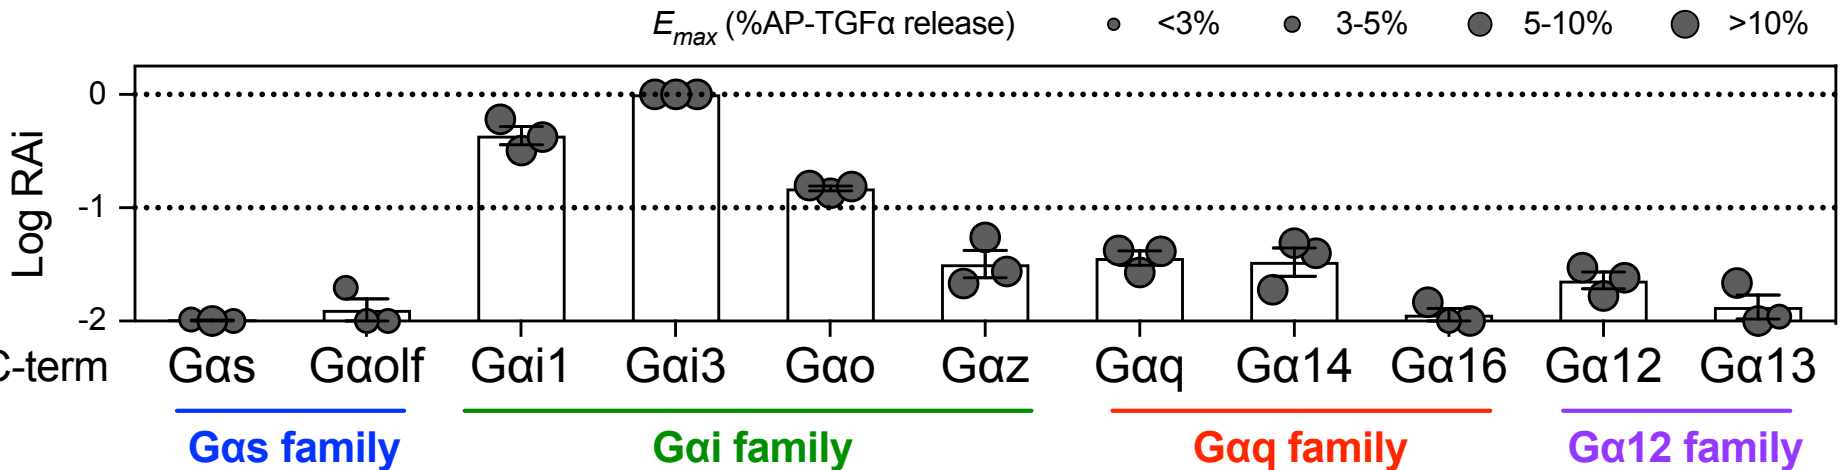

GPCR gene symbol: *GALR2*

GPCR name: GAL2

Tested ligand: Galanin

### C-terminal chimera co-expression

#### Gas family

#### Gai family

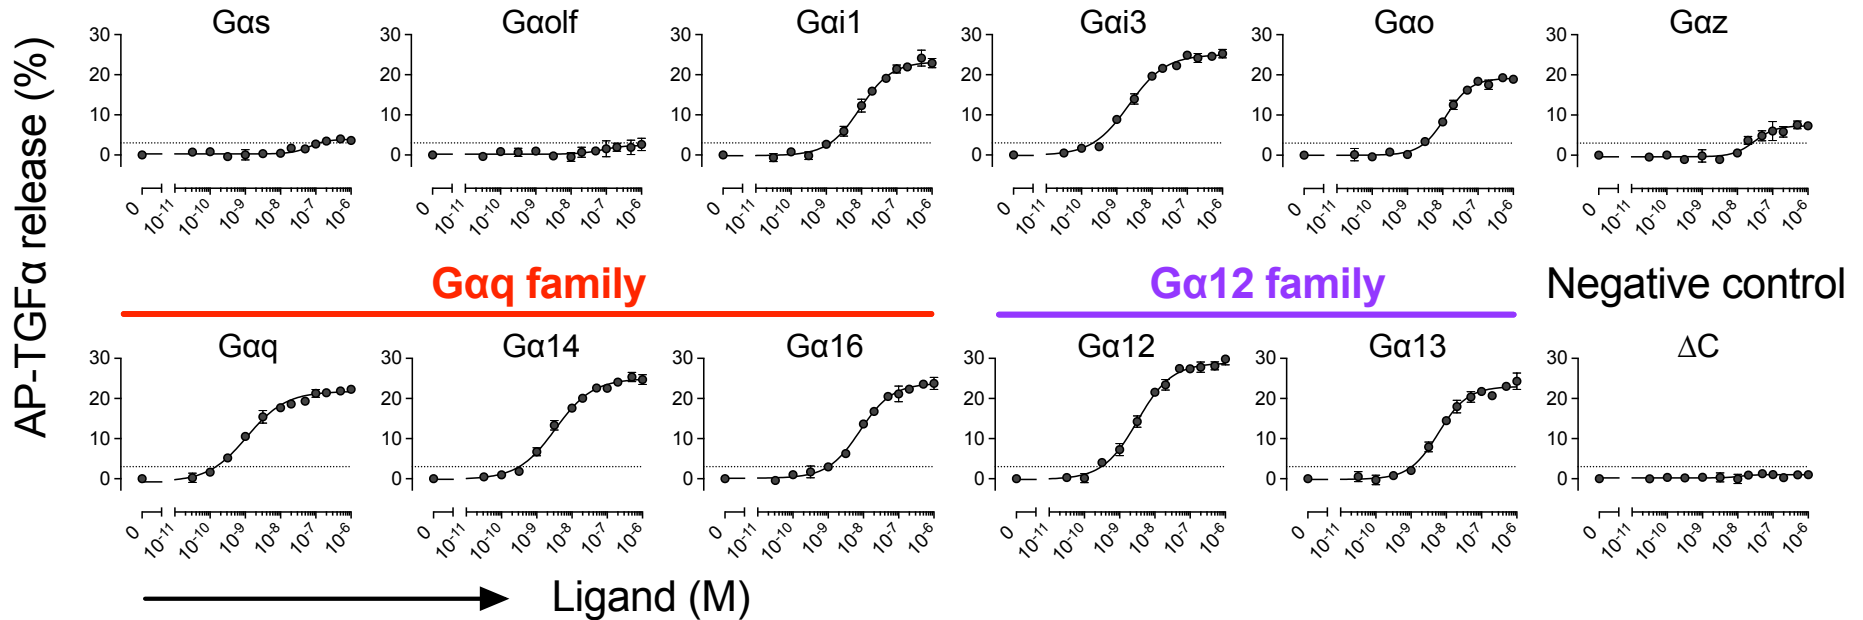

$E_{max}$  (%AP-TGF $\alpha$  release)    • <3%    • 3-5%    • 5-10%    • >10%

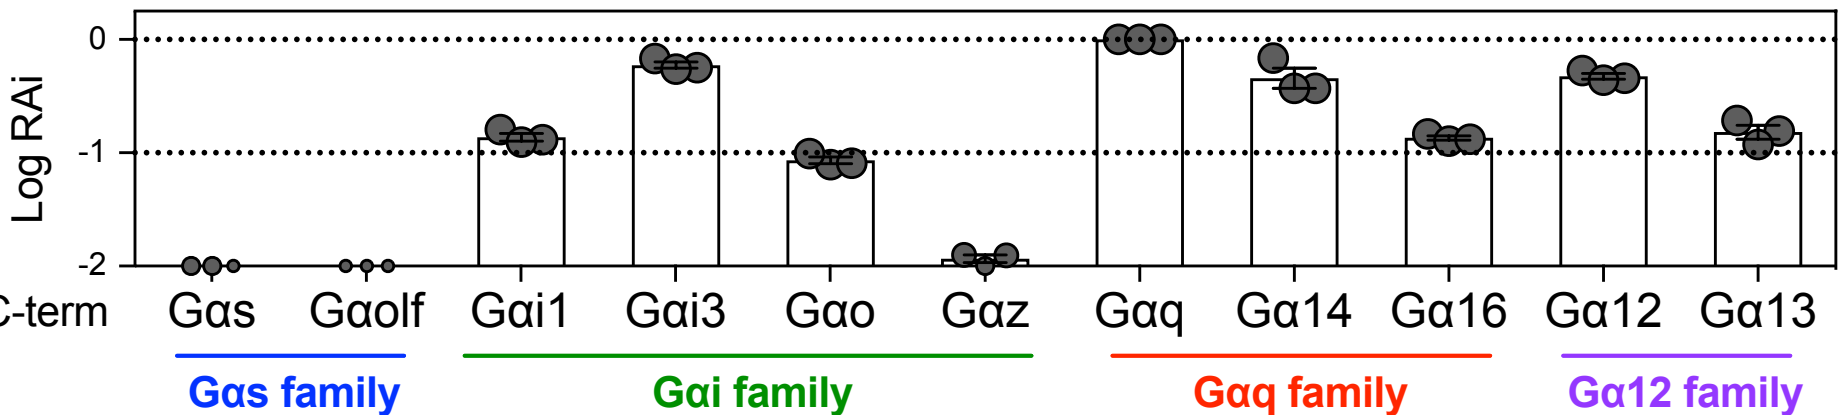

GPCR gene symbol: *GALR3*

GPCR name: GAL3

Tested ligand: Galanin (rat)

### C-terminal chimera co-expression

#### Gas family

#### Gai family

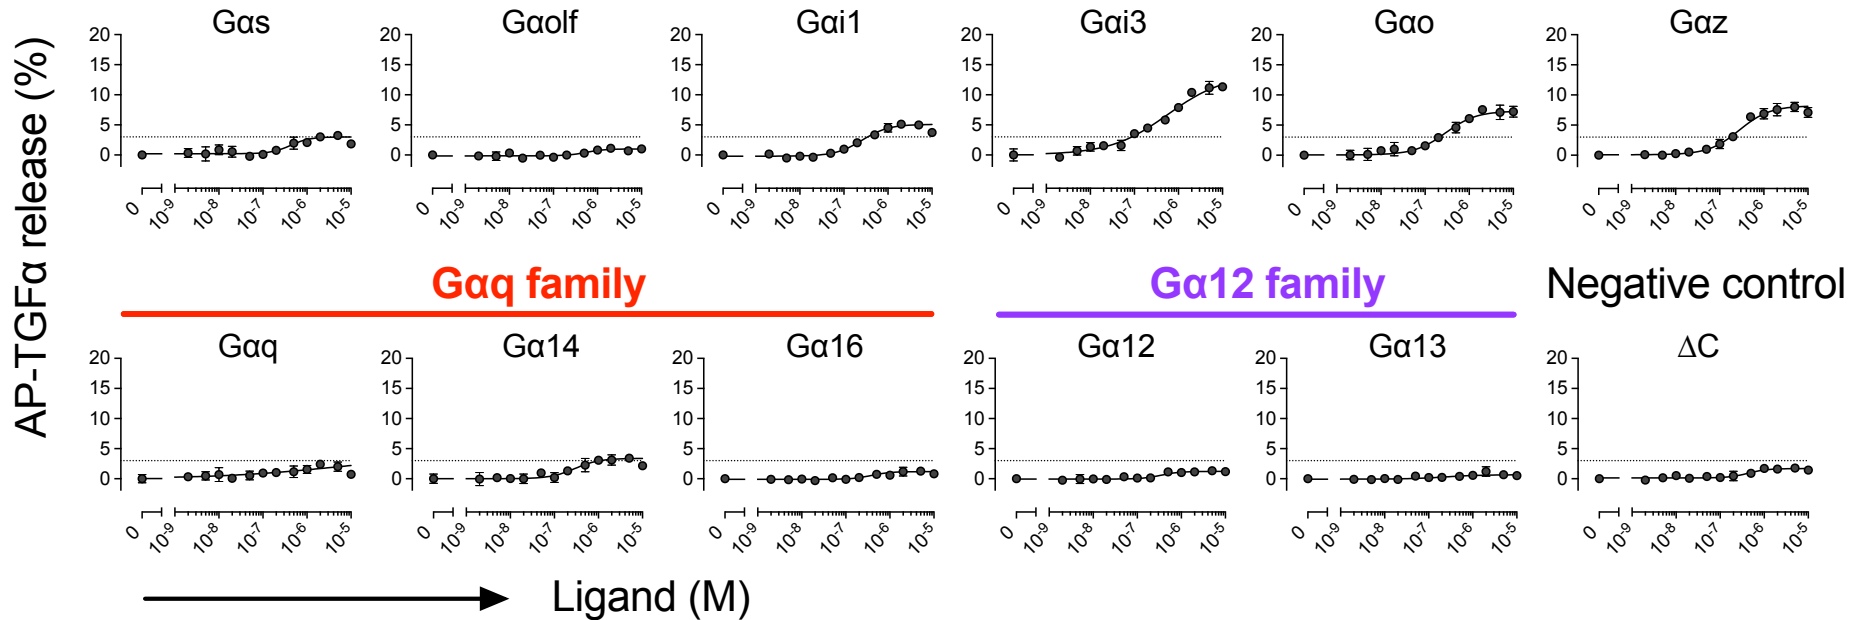

$E_{max}$  (%AP-TGFα release)

● <3%   ● 3-5%   ● 5-10%   ● >10%

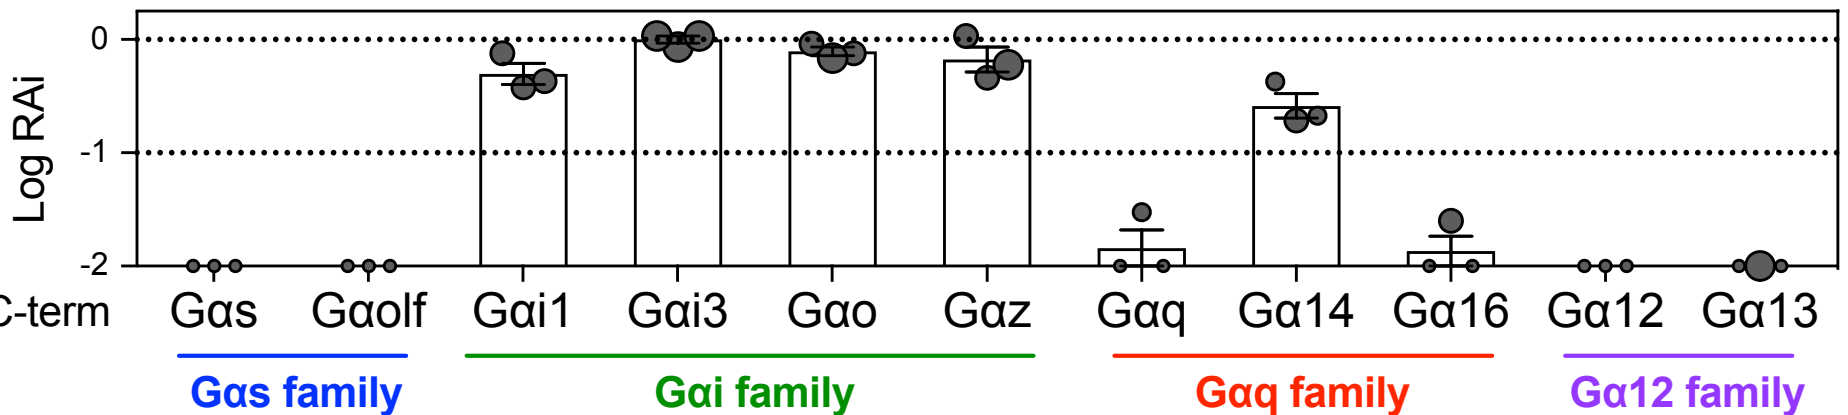

GPCR gene symbol: *GHSR*

GPCR name: GHSR

Tested ligand: MK-0677

### C-terminal chimera co-expression

#### Gas family

#### Gai family

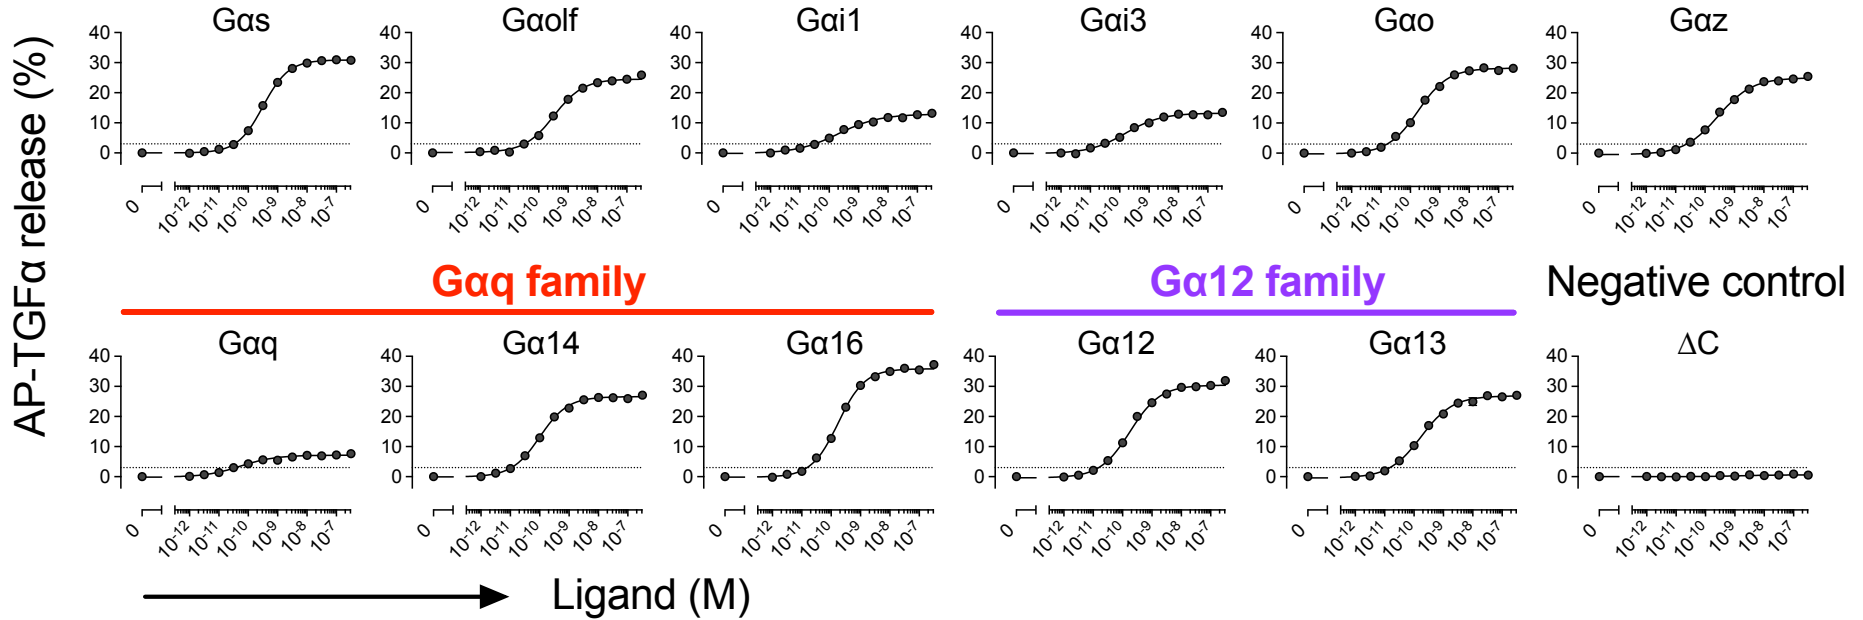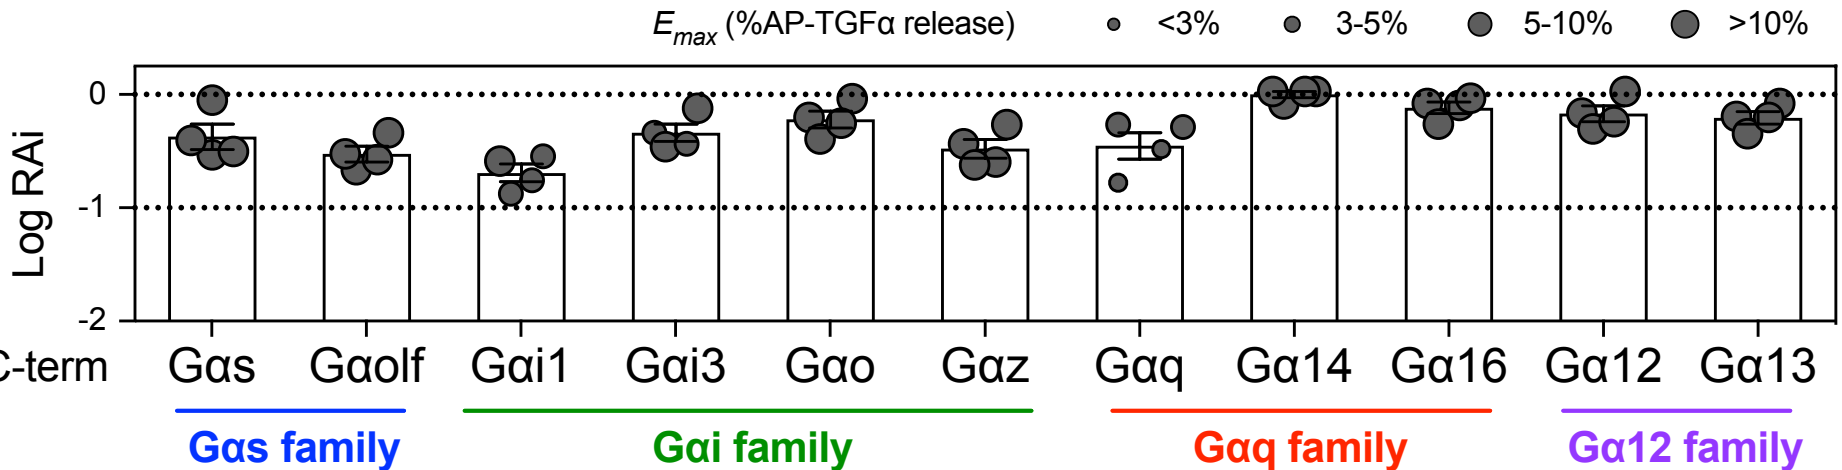

GPCR gene symbol: *GIPR*

GPCR name: GIPR

Tested ligand: Gastric inhibitory polypeptide (GIP)

### C-terminal chimera co-expression

#### Gas family

#### Gai family

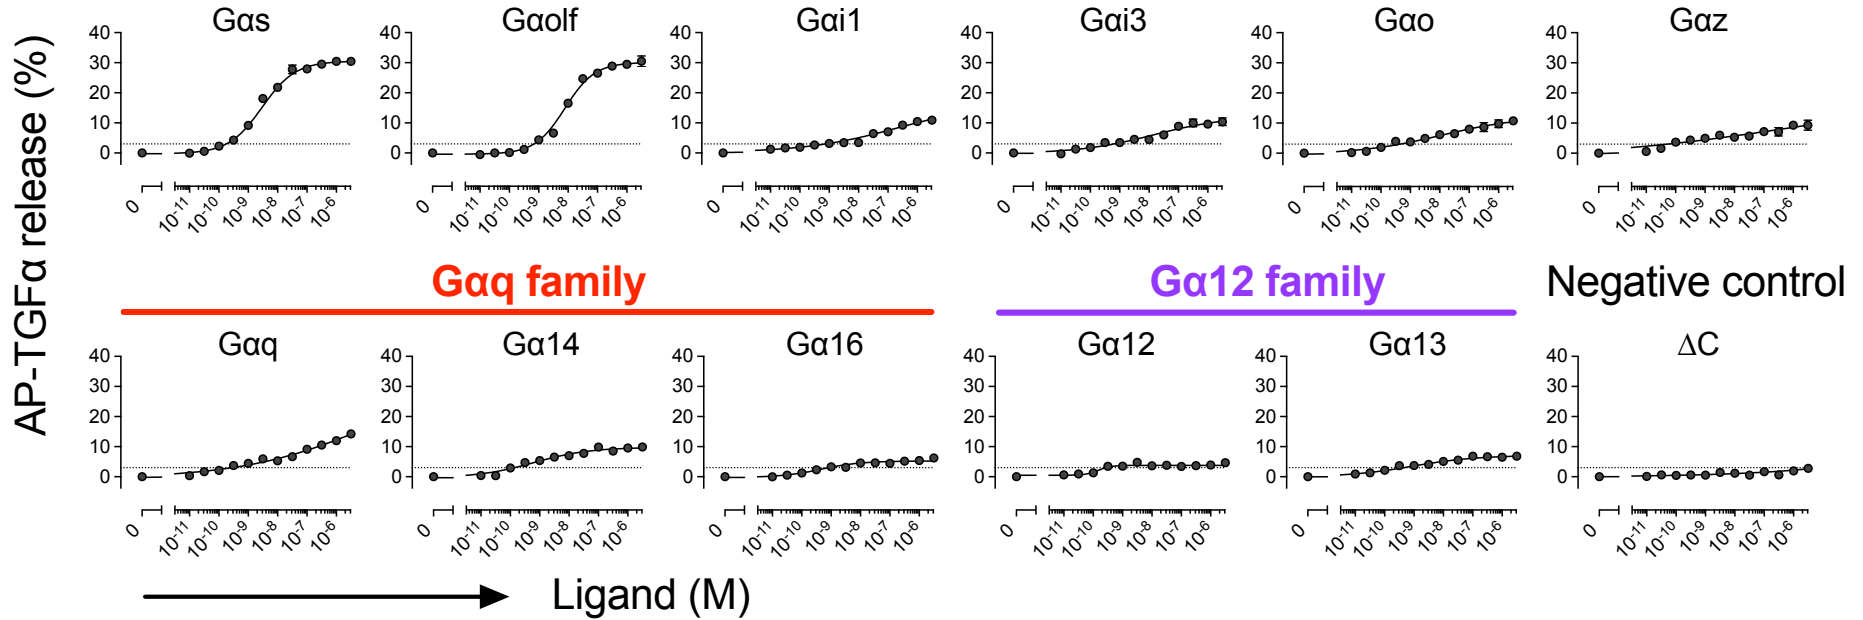

$E_{max}$  (%AP-TGFα release)    • <3%    ● 3-5%    ● 5-10%    ● >10%

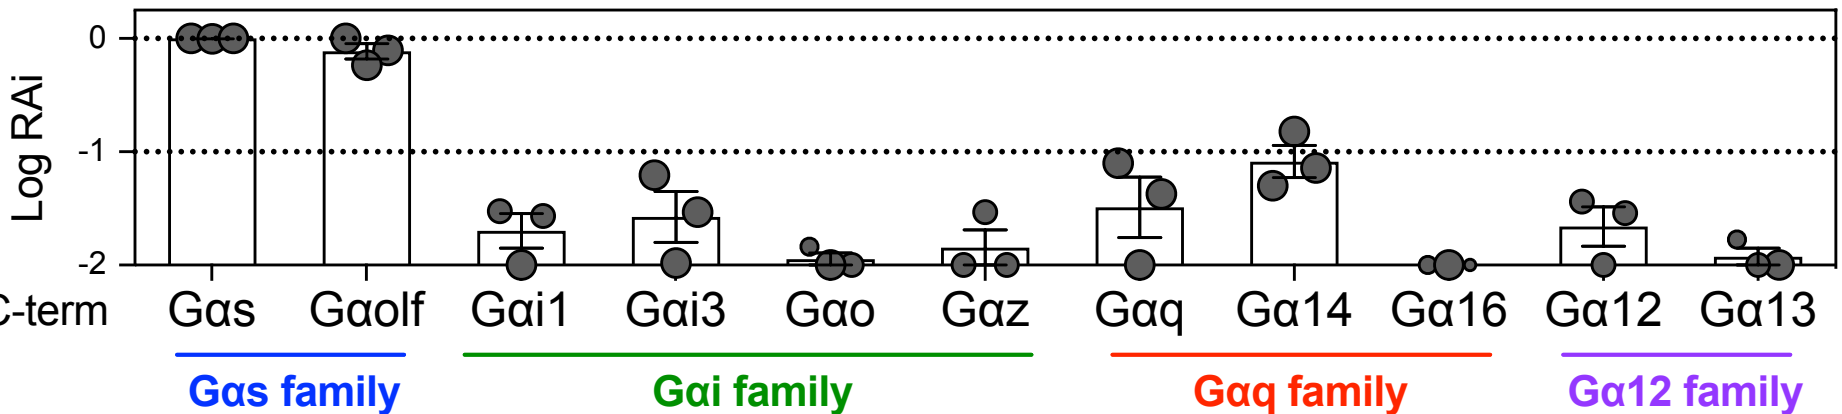

GPCR gene symbol: *GNRHR*

GPCR name: GNRHR

Tested ligand: Leuprolide

### C-terminal chimera co-expression

#### Gas family

#### Gai family

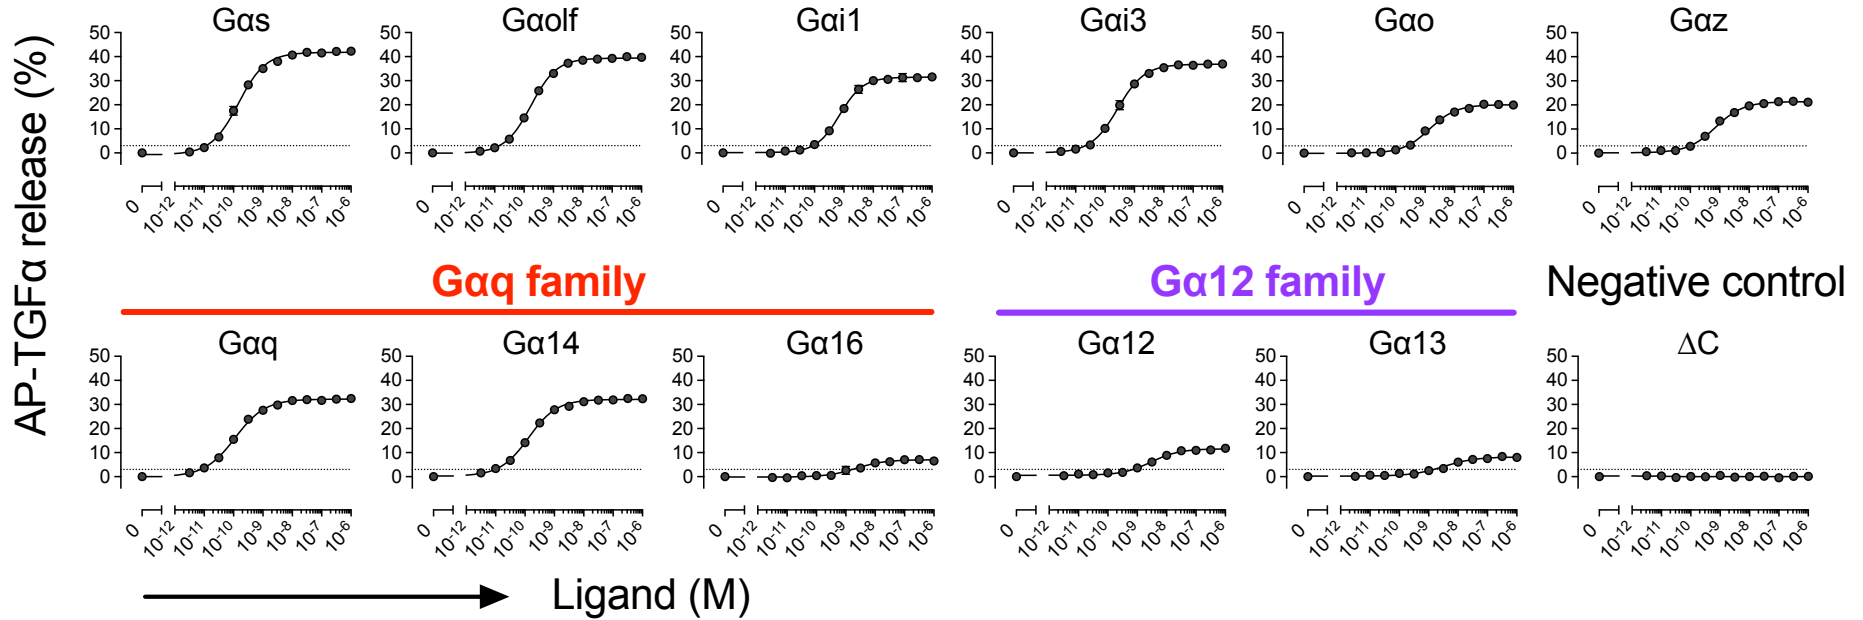

$E_{max}$  (%AP-TGFα release)    ● <3%    ● 3-5%    ● 5-10%    ● >10%

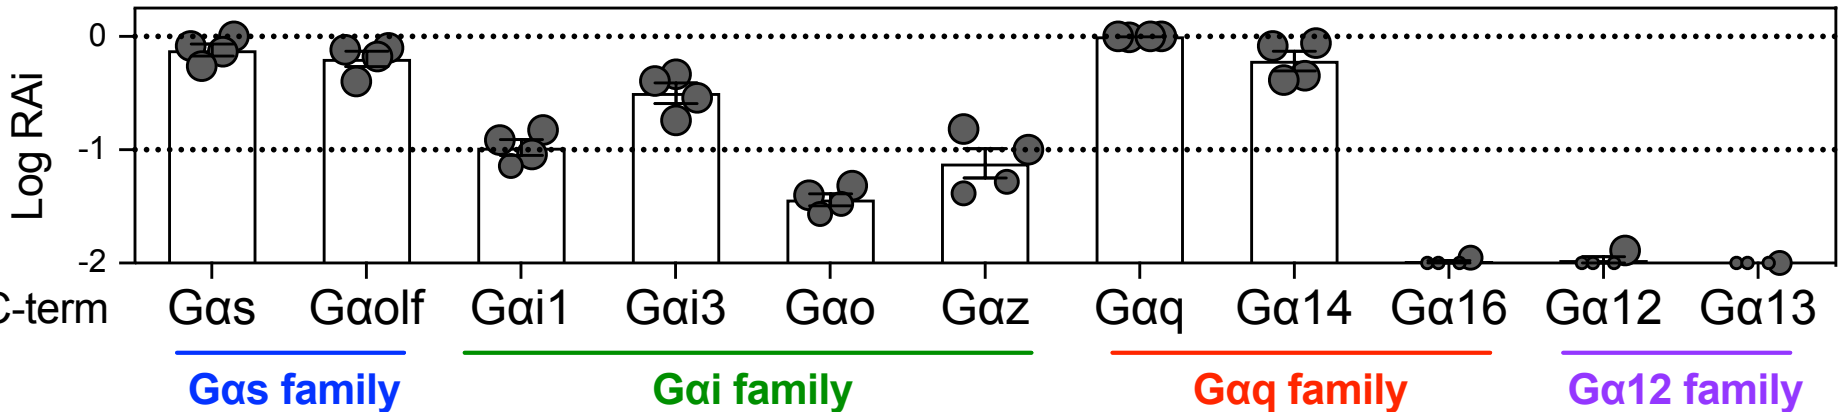

GPCR gene symbol: *GPR119*

GPCR name: GPR119

Tested ligand: GSK1292263

### C-terminal chimera co-expression

#### Gas family

#### Gai family

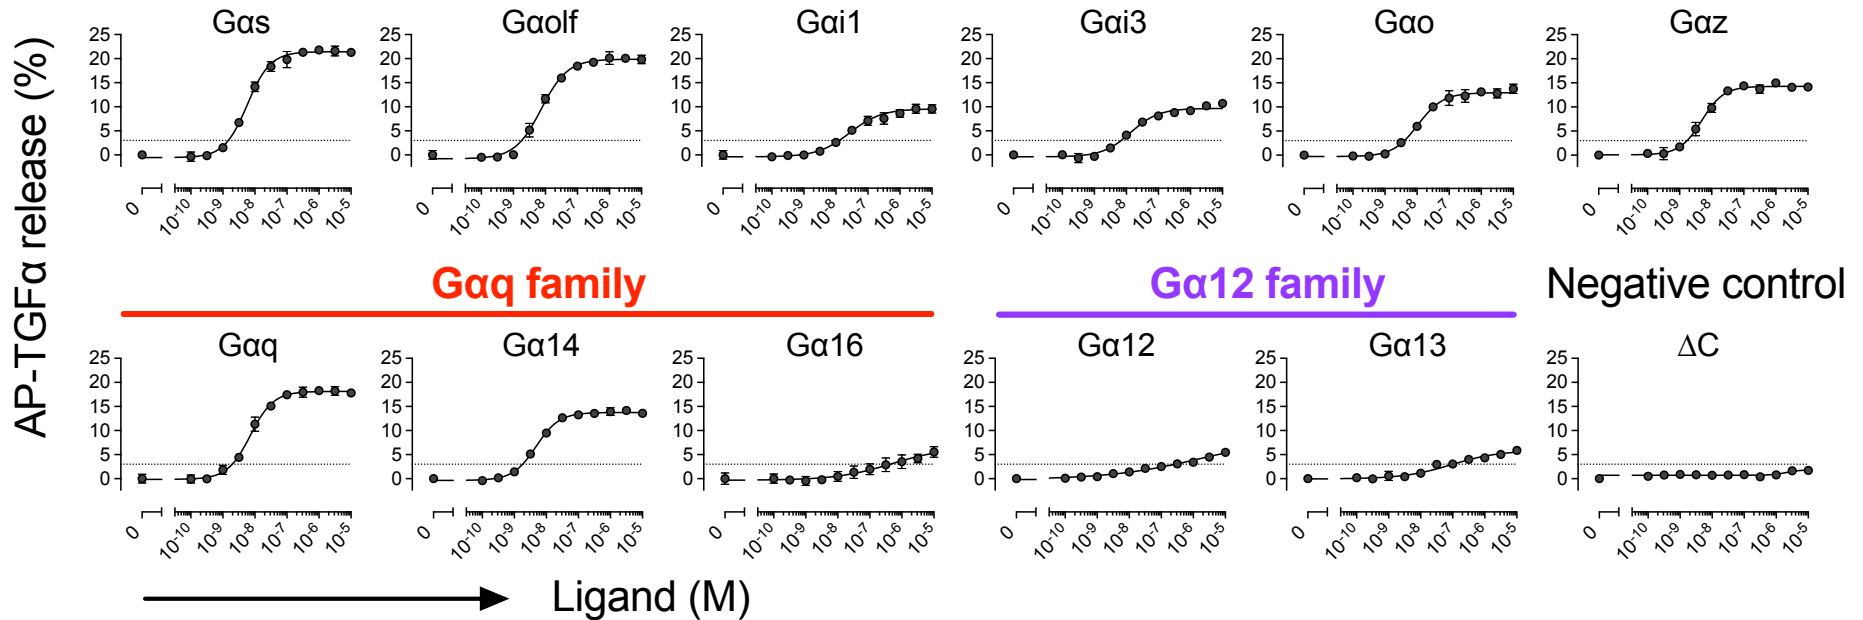

$E_{max}$  (%AP-TGFα release)

• <math><3\%</math>

• <math>3-5\%</math>

• <math>5-10\%</math>

• <math>>10\%</math>

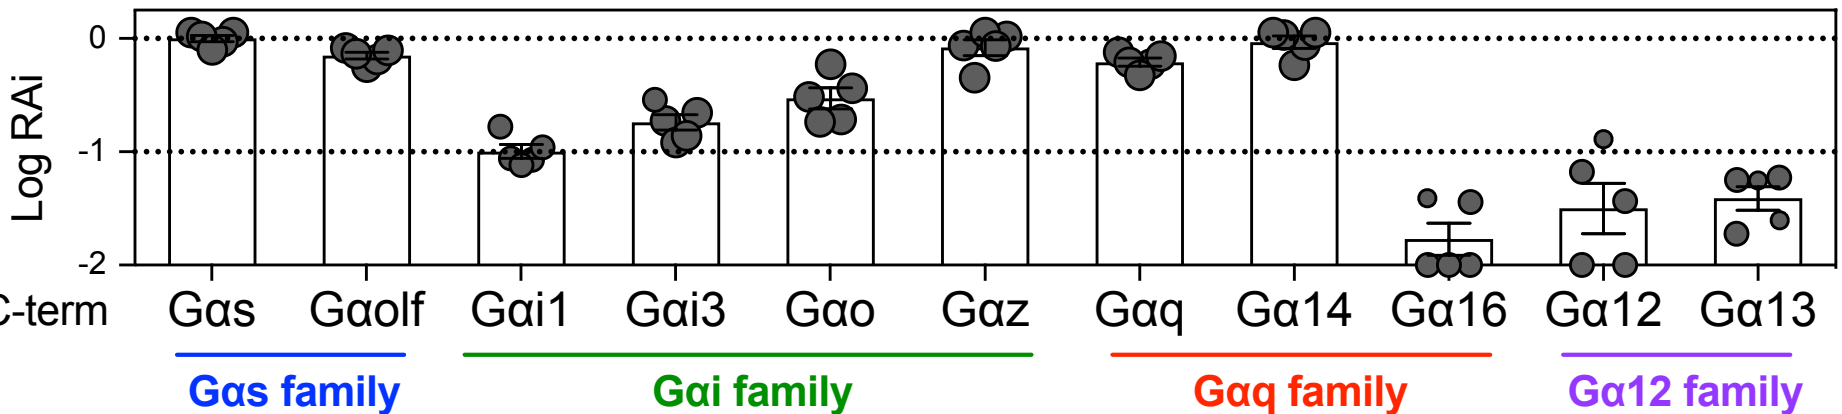



GPCR gene symbol: *GPR132*

GPCR name: G2A

Tested ligand: 9-Hydroxyoctadecadienoic acid

### C-terminal chimera co-expression

#### Gas family

#### Gai family

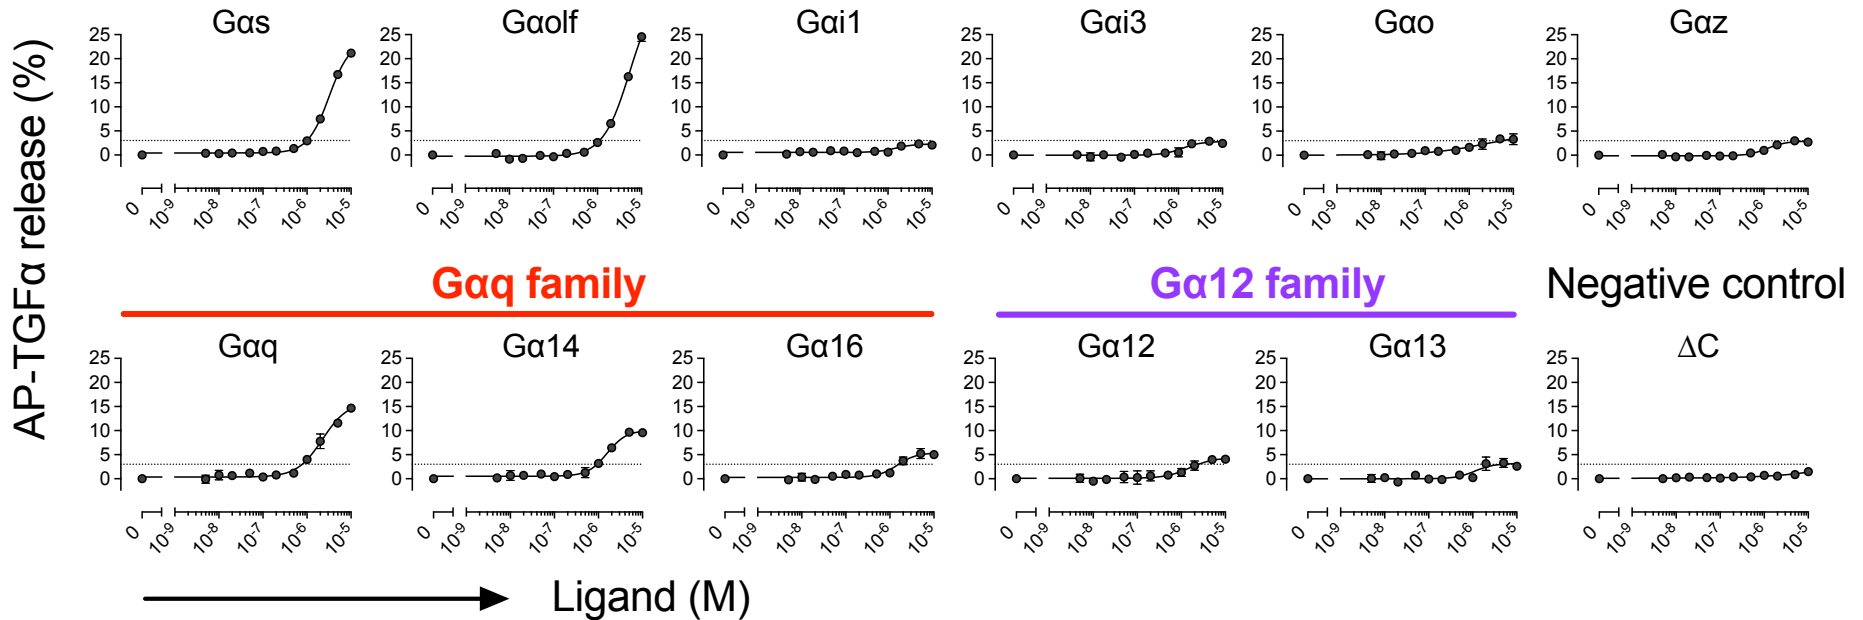

$E_{max}$  (%AP-TGFα release)    ● <3%    ● 3-5%    ● 5-10%    ● >10%

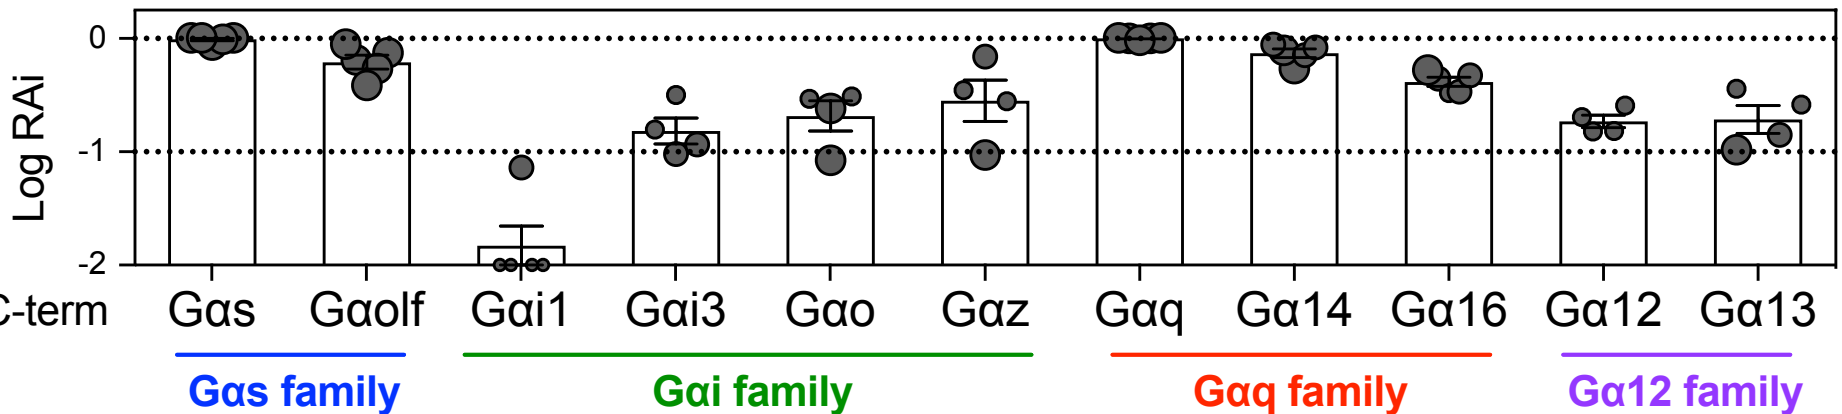

GPCR gene symbol: *GPR17*

GPCR name: GPR17

Tested ligand: MDL29951

### C-terminal chimera co-expression

#### Gas family

#### Gai family

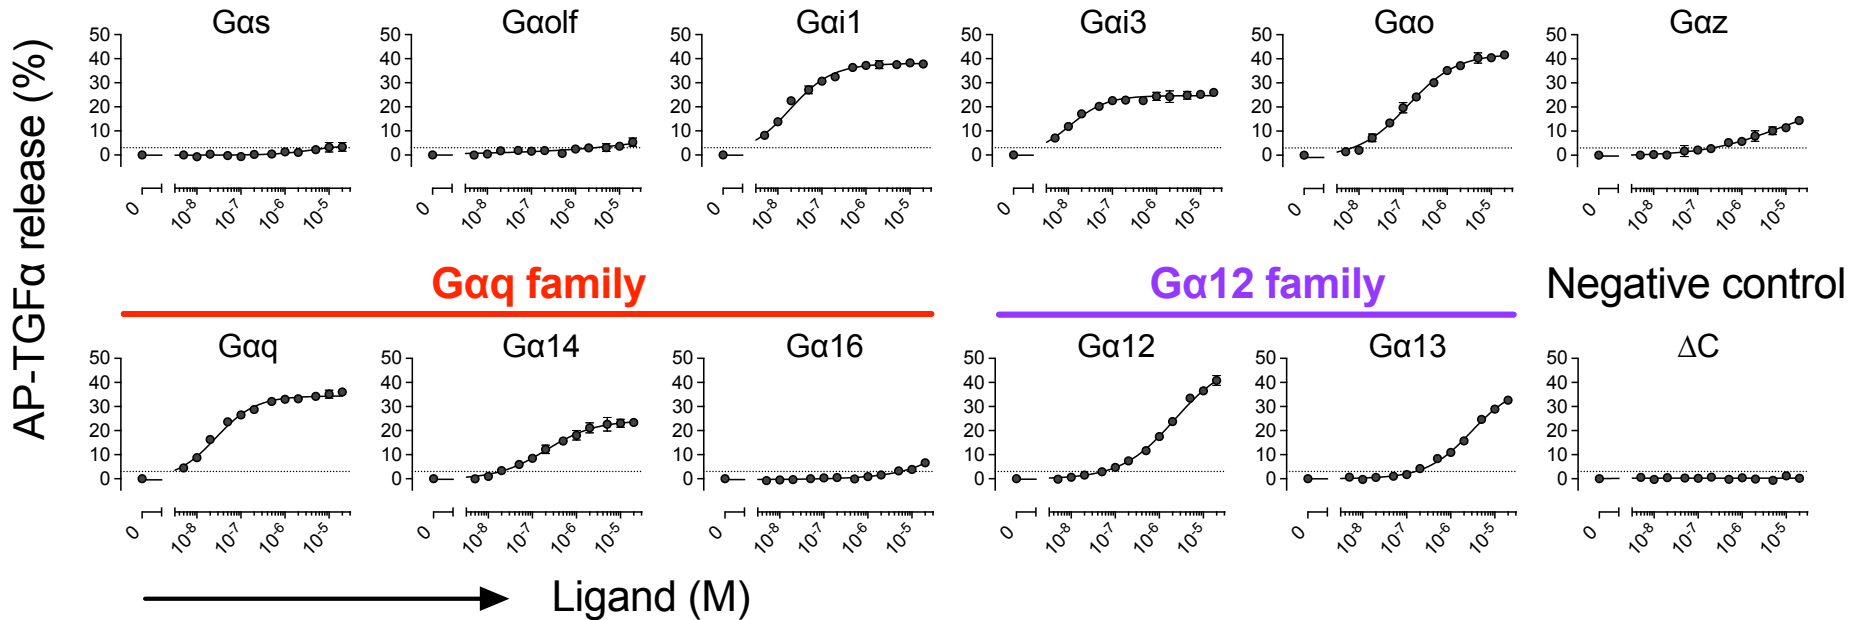

$E_{max}$  (%AP-TGFα release)    ● <3%    ● 3-5%    ● 5-10%    ● >10%

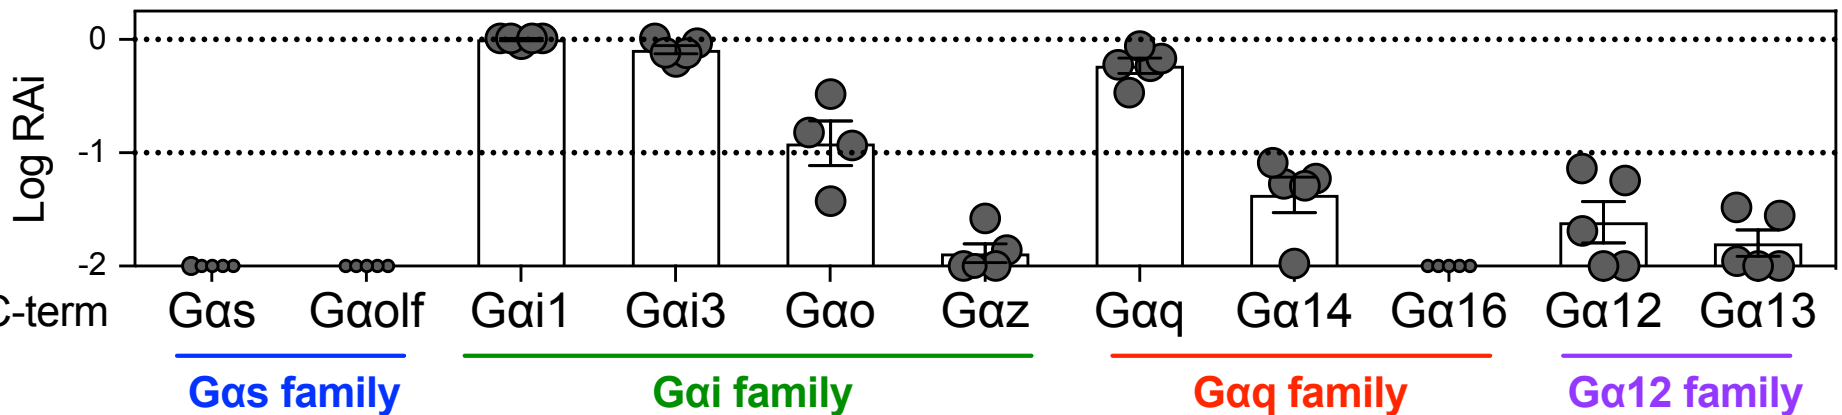

GPCR gene symbol: *GPR174*

GPCR name: GPR174

Tested ligand: Lysophosphatidylserine

### C-terminal chimera co-expression

#### Gas family

#### Gai family

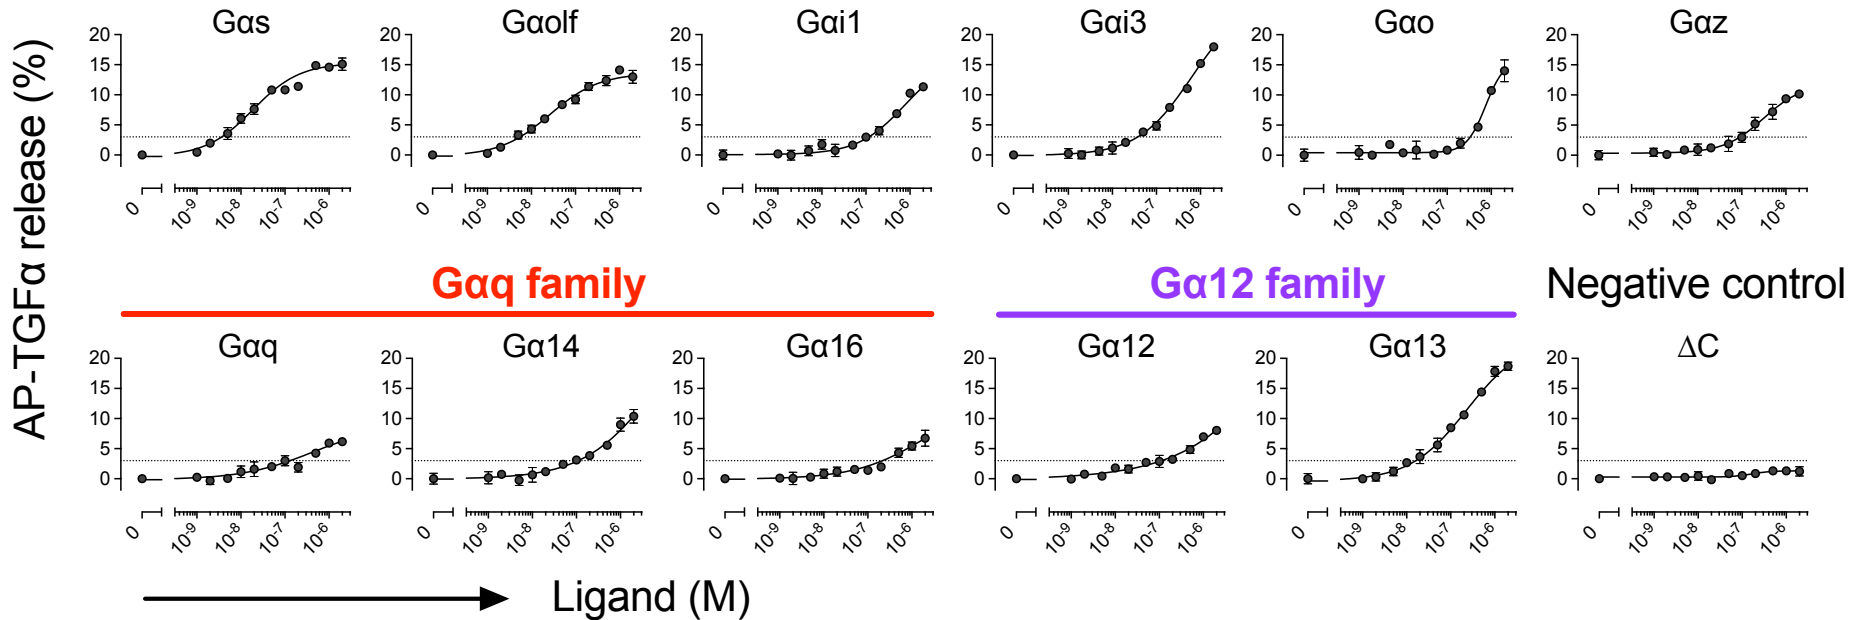

$E_{max}$  (%AP-TGFα release)    ● <3%    ● 3-5%    ● 5-10%    ● >10%

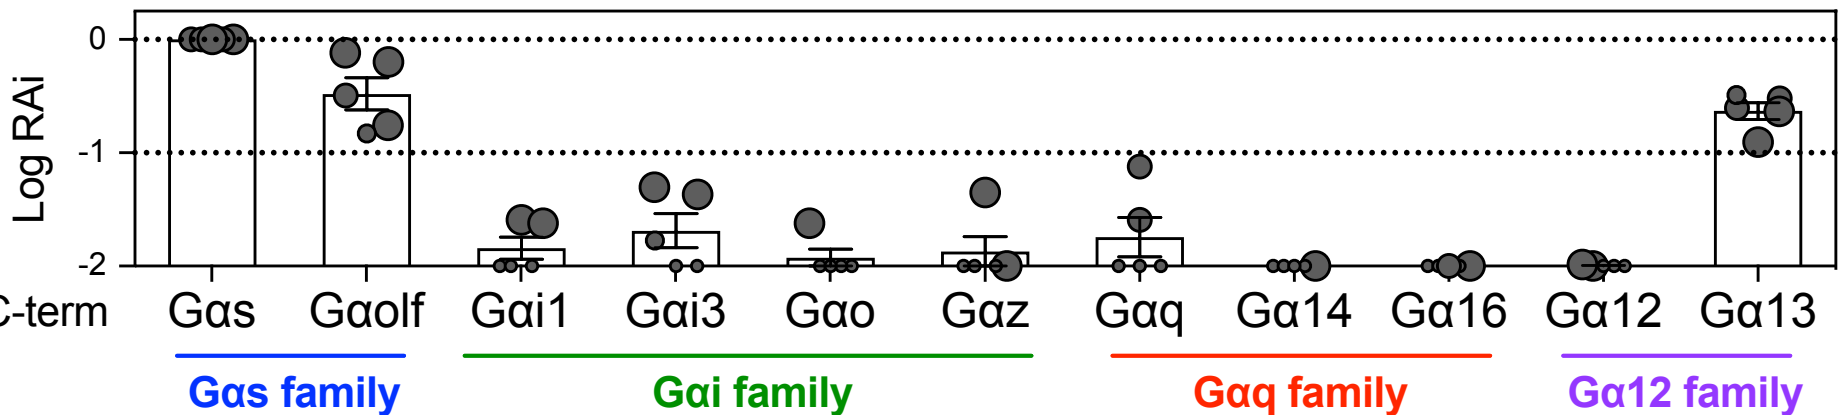

GPCR gene symbol: *GPR183*

GPCR name: EBI2

Tested ligand: 7 $\alpha$ , 25-Dyhydroxycholesterol

### C-terminal chimera co-expression

#### Gas family

#### Gai family

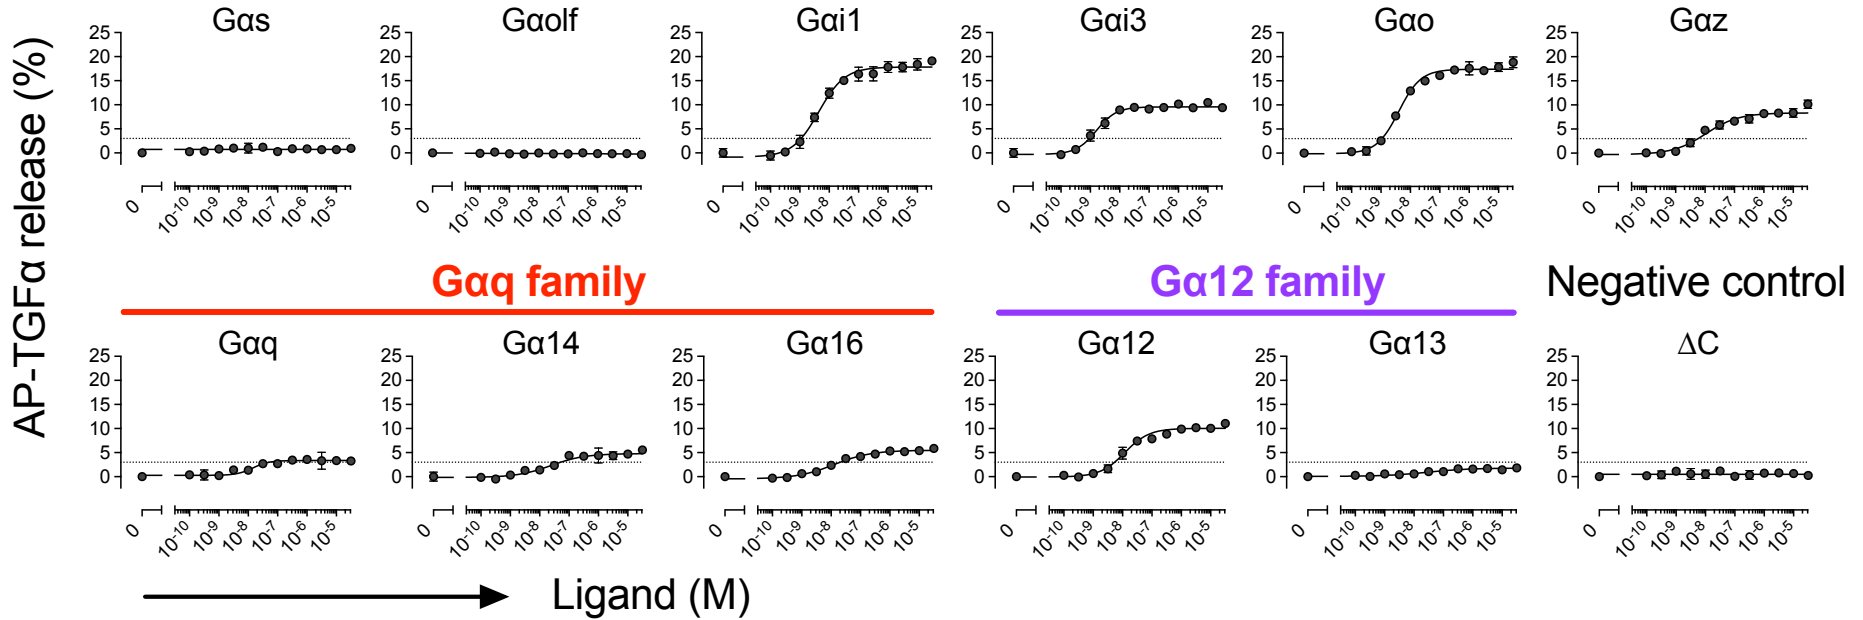

$E_{max}$  (%AP-TGF $\alpha$  release)    ● <3%    ● 3-5%    ● 5-10%    ● >10%

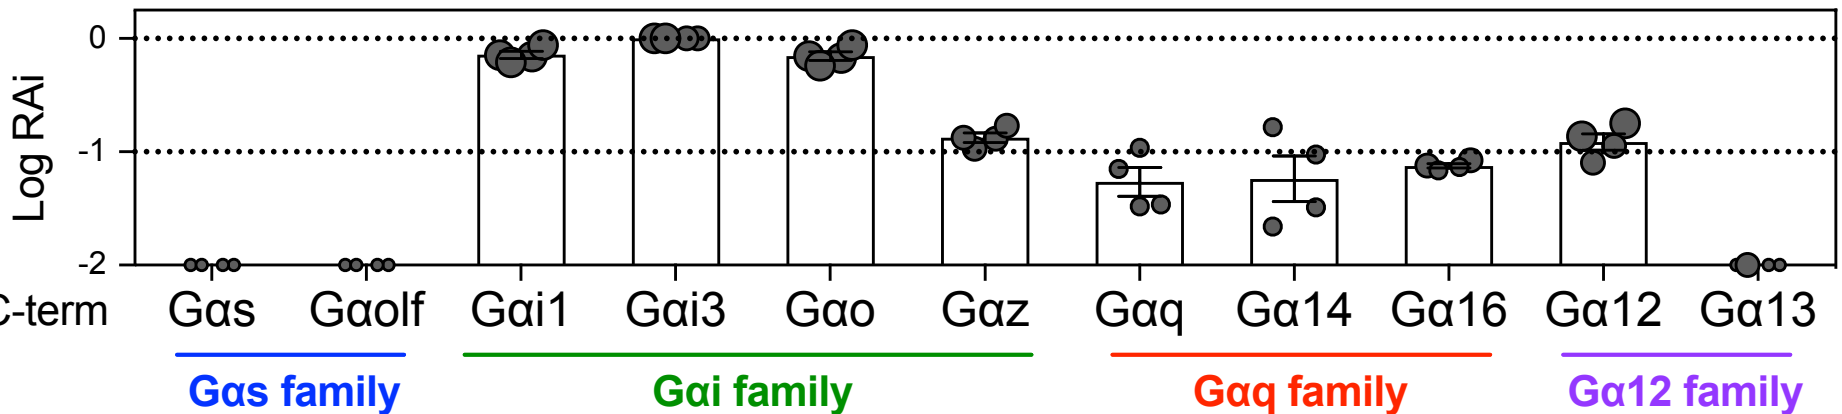

GPCR gene symbol: *GPR34*

GPCR name: GPR34

Tested ligand: Lysophosphatidylserine

### C-terminal chimera co-expression

#### Gas family

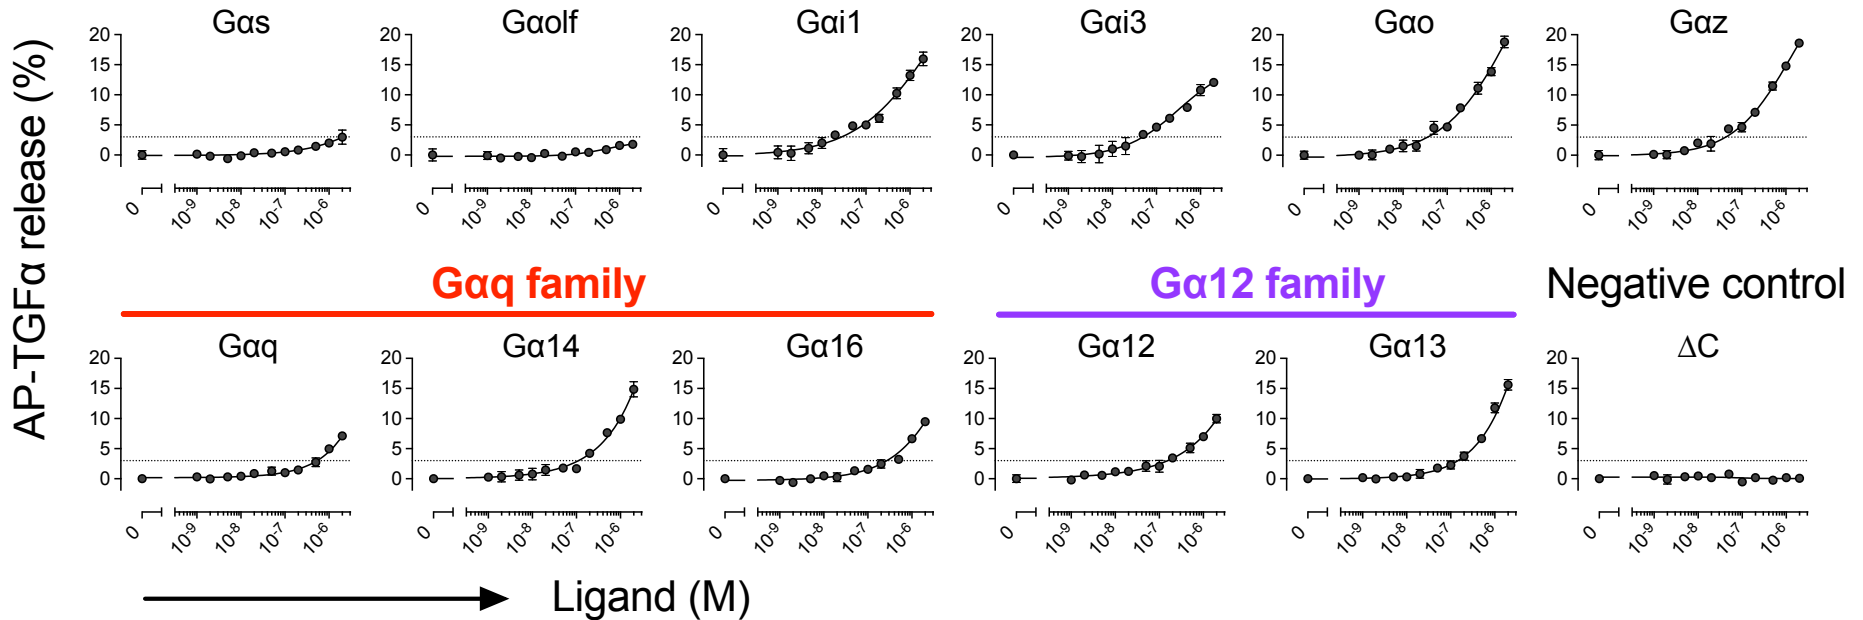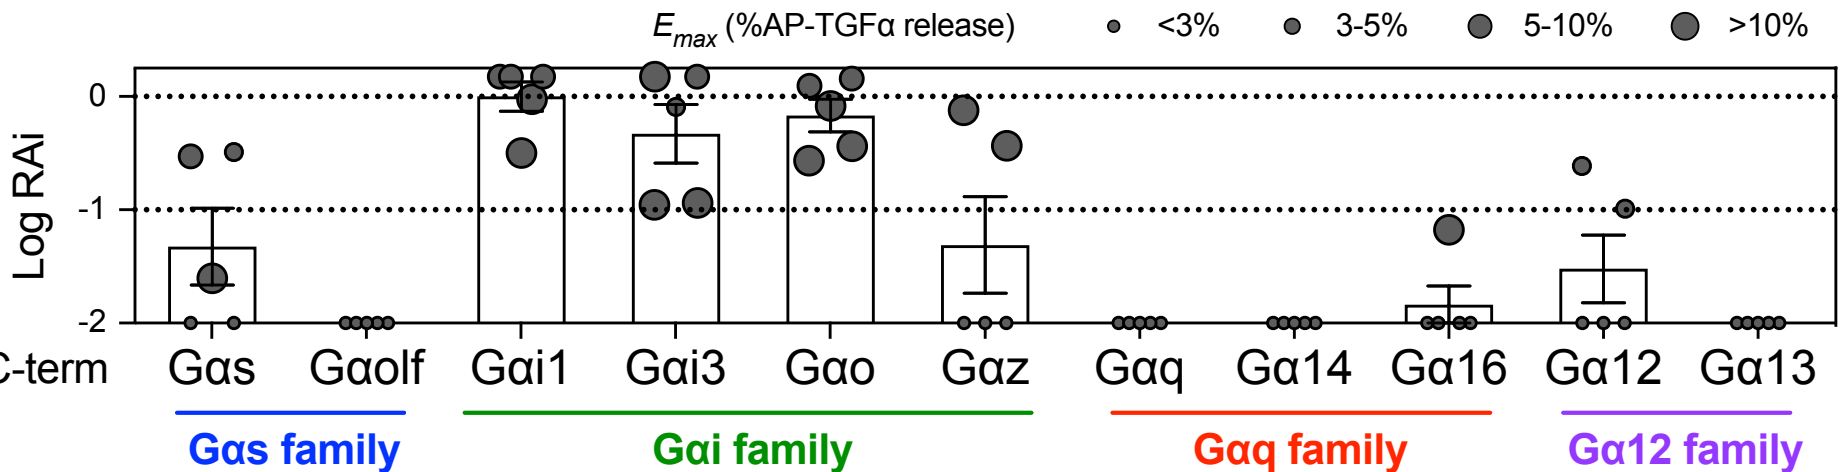

GPCR gene symbol: *GPR35*

GPCR name: GPR35

Tested ligand: Zaprinast

### C-terminal chimera co-expression

#### Gas family

#### Gai family

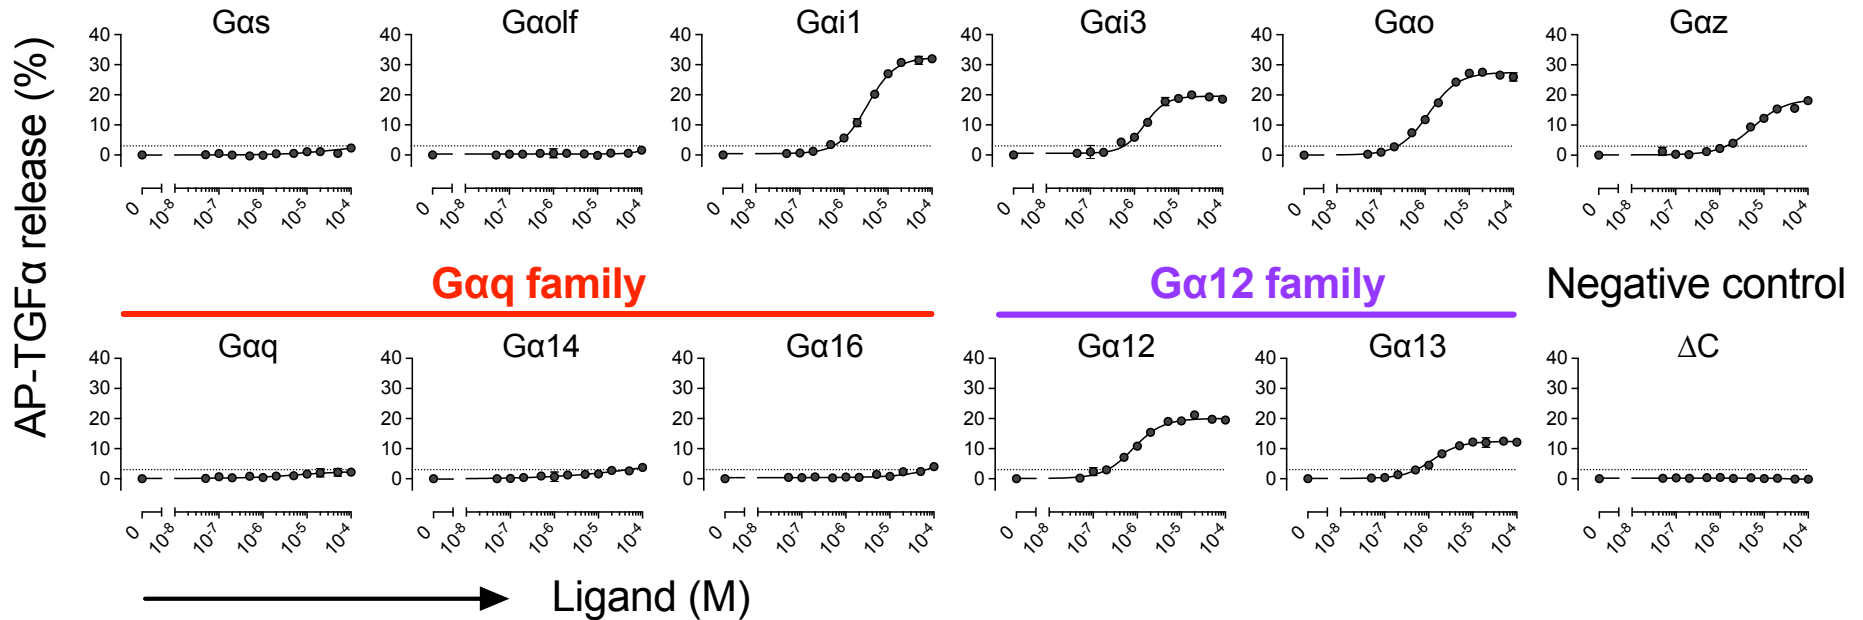

$E_{max}$  (%AP-TGFα release)

● <3%

● 3-5%

● 5-10%

● >10%

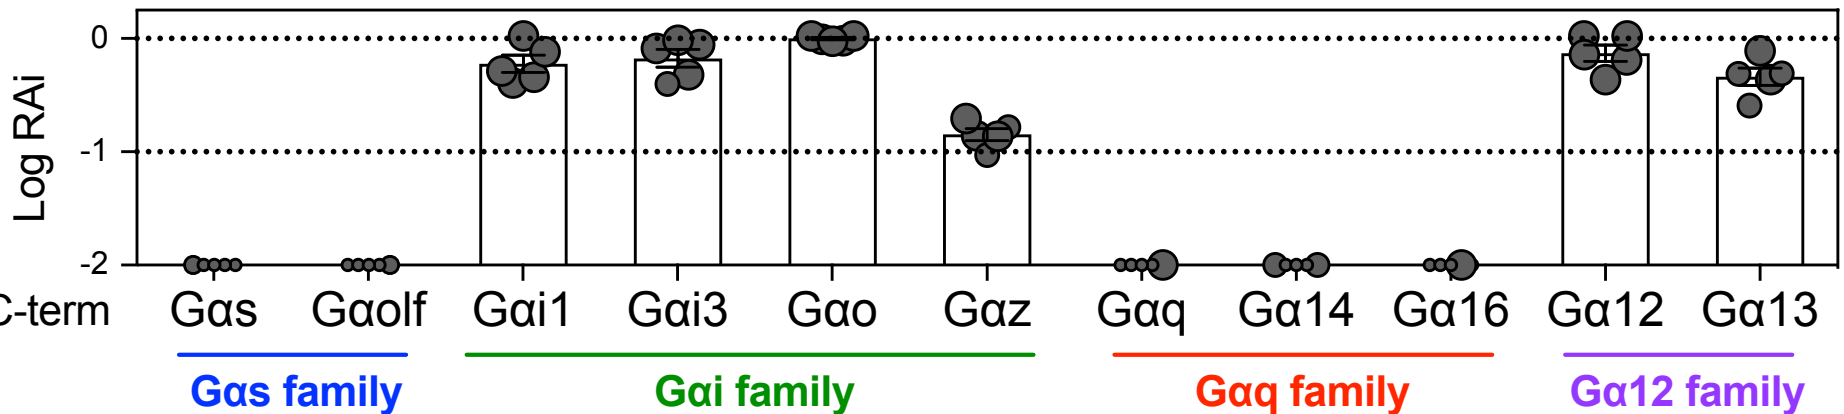

GPCR gene symbol: *GPR55*

GPCR name: GPR55

Tested ligand: Lyso-phosphatidylinositol

### C-terminal chimera co-expression

#### Gas family

#### Gai family

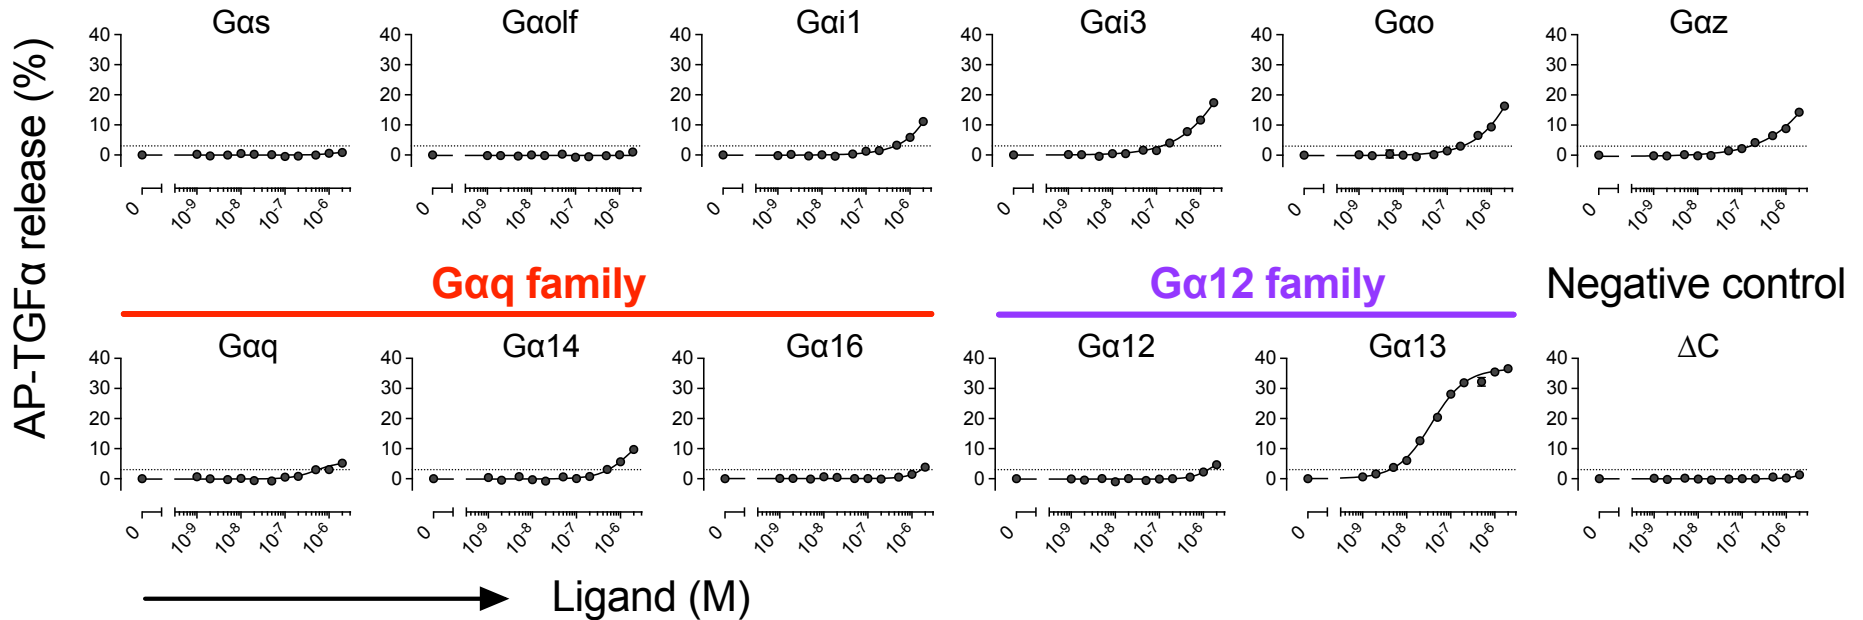

$E_{max}$  (%AP-TGFα release)    ● <3%    ● 3-5%    ● 5-10%    ● >10%

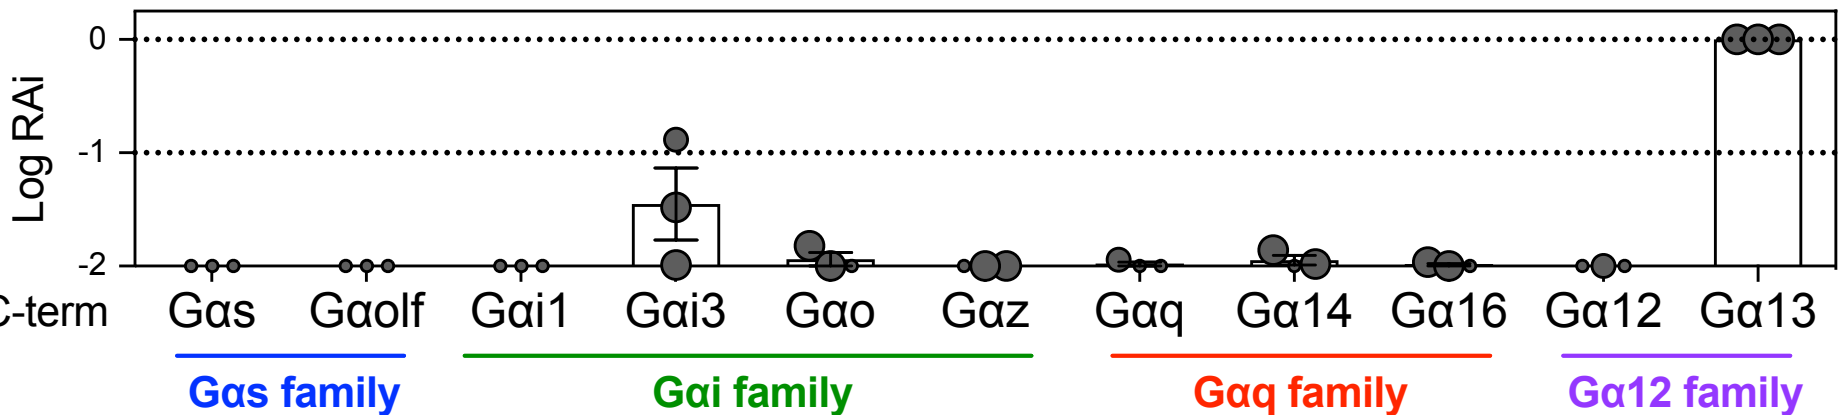

GPCR gene symbol: *GPR84*

GPCR name: GPR84

Tested ligand: Capric acid

### C-terminal chimera co-expression

#### Gas family

#### Gai family

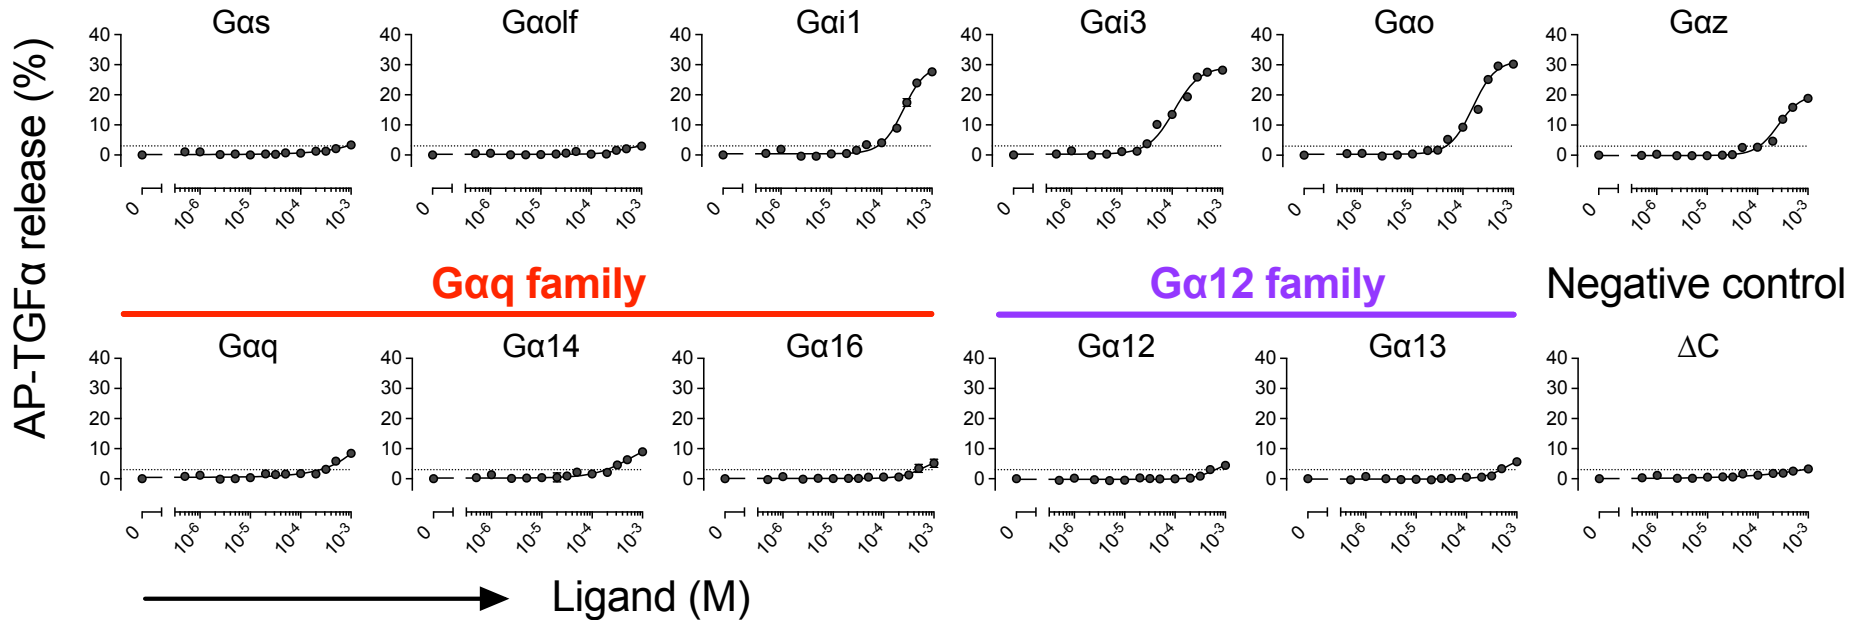

$E_{max}$  (%AP-TGFα release)    ● <3%    ● 3-5%    ● 5-10%    ● >10%

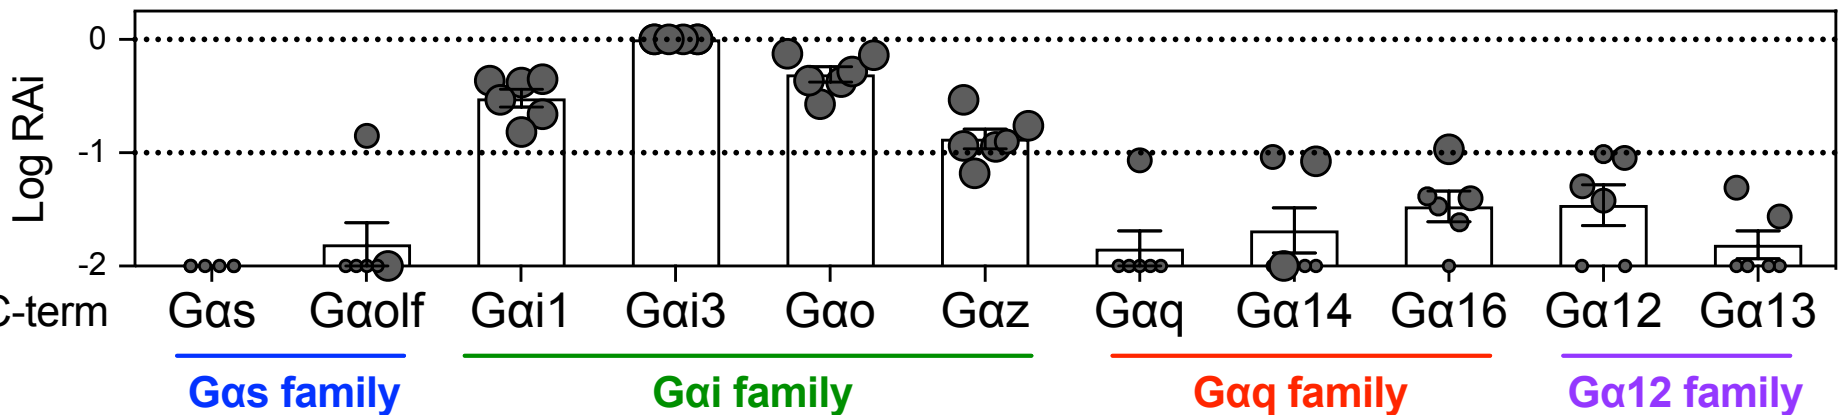



GPCR gene symbol: *GRPR*

GPCR name: BB2

Tested ligand: Bombesin

### C-terminal chimera co-expression

#### Gas family

#### Gai family

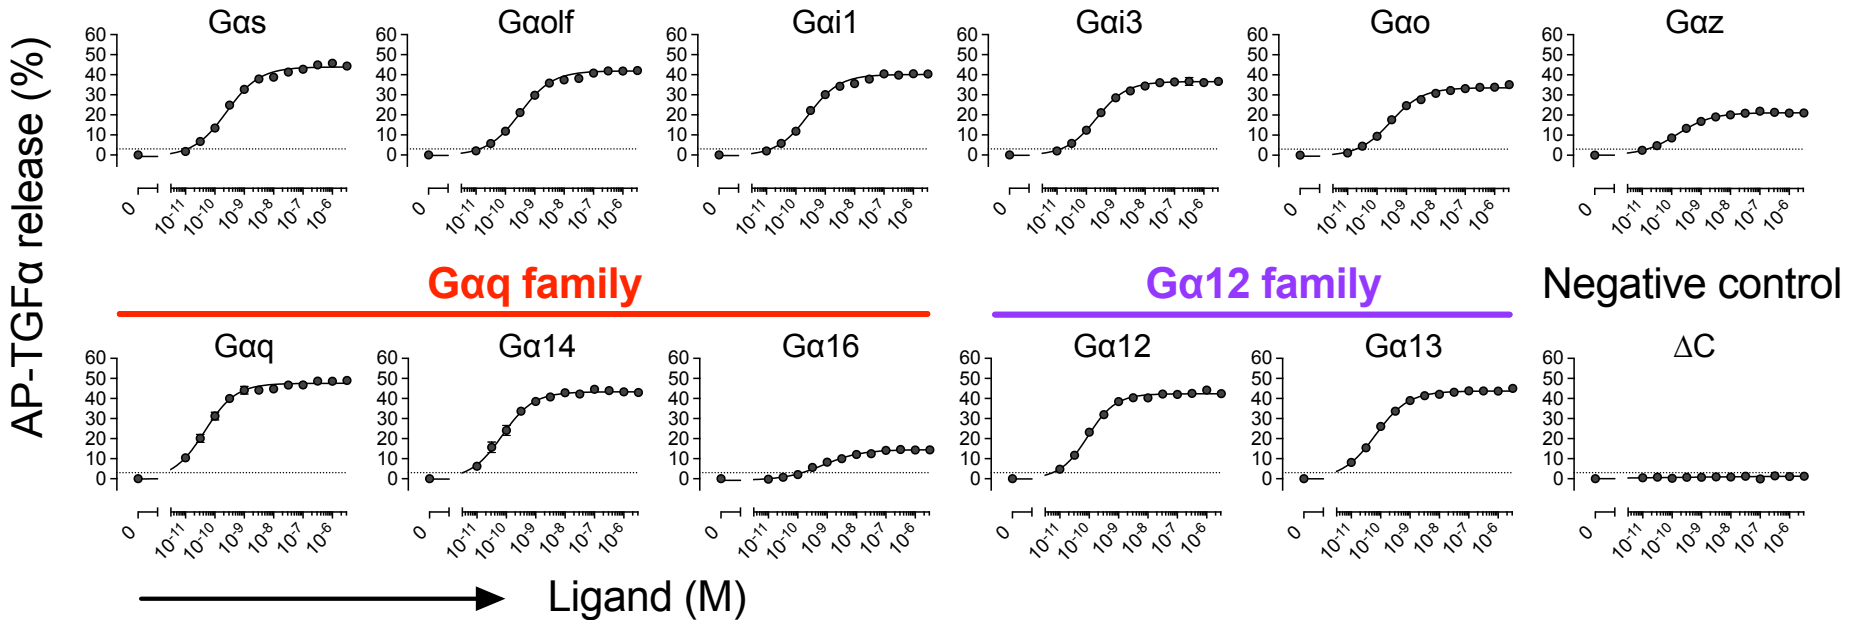

E<sub>max</sub> (%AP-TGFα release)

● <3%   ● 3-5%   ● 5-10%   ● >10%

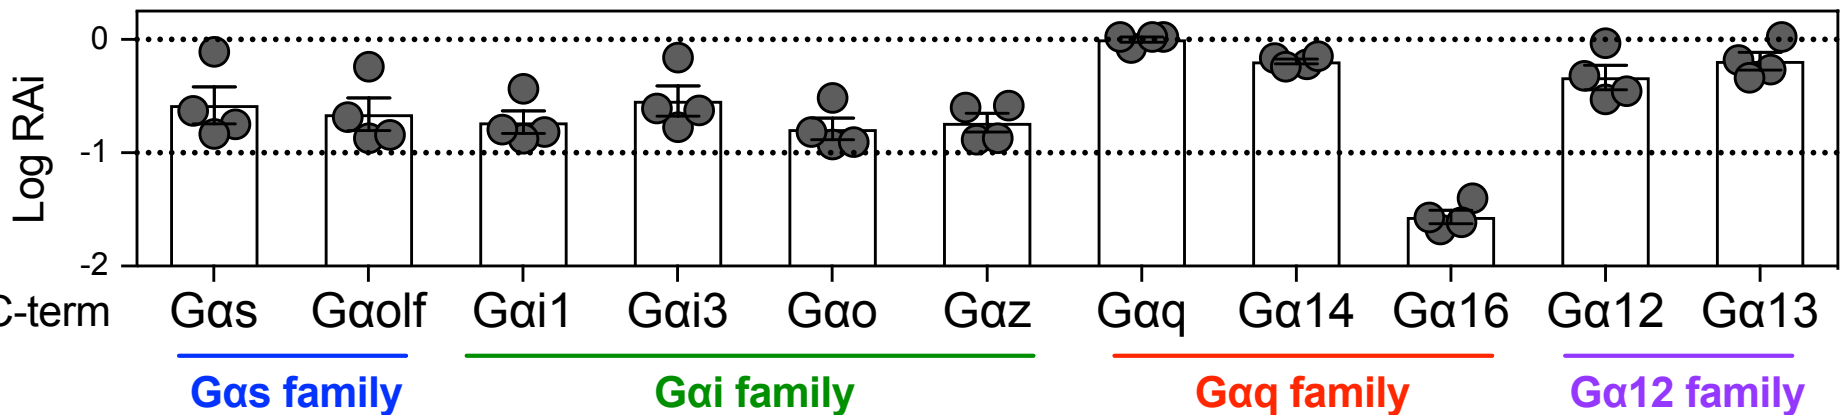

GPCR gene symbol: *HCRTR1*

GPCR name: OX1

Tested ligand: Orexin-A

### C-terminal chimera co-expression

#### Gas family

#### Gai family

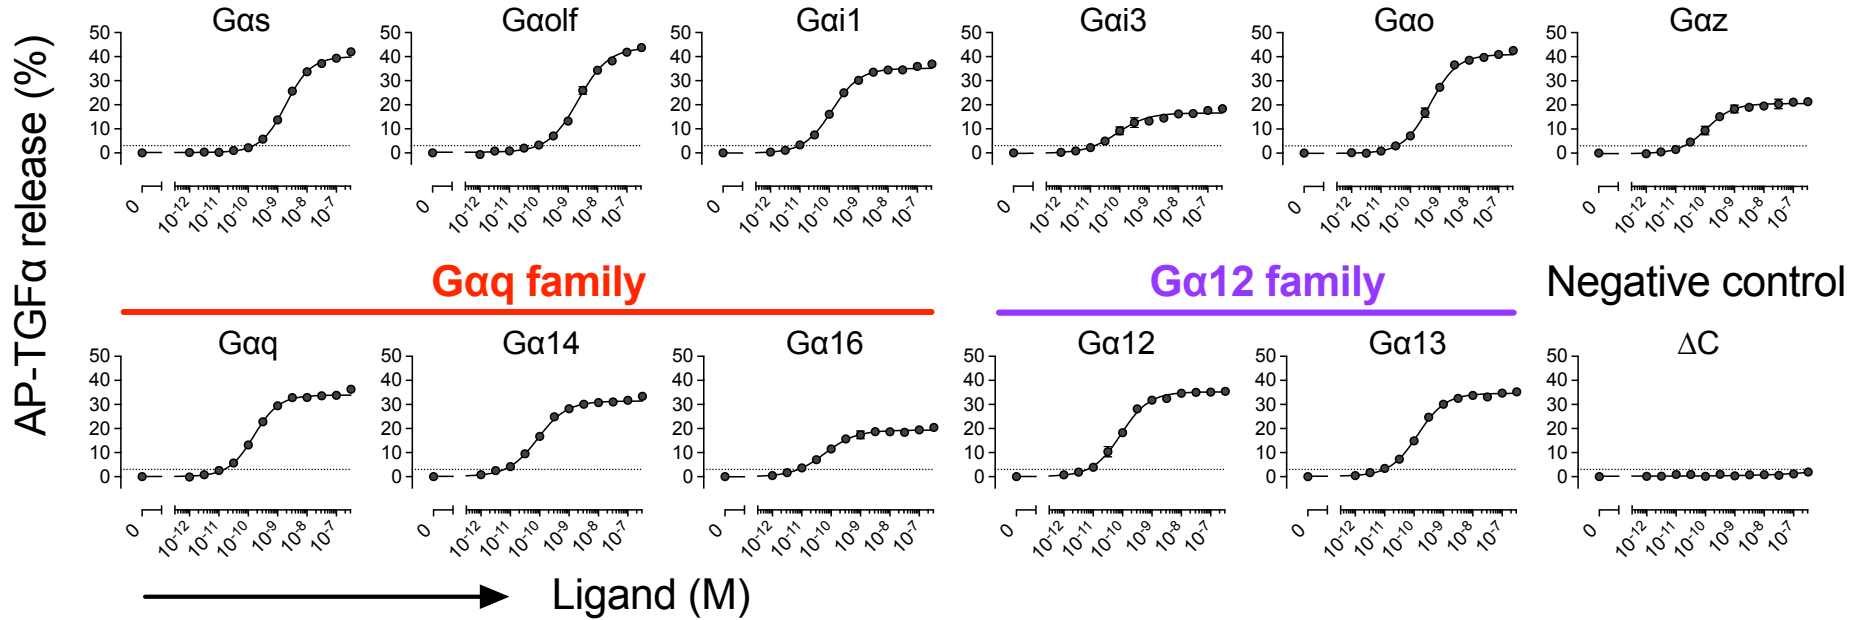

$E_{max}$  (%AP-TGFα release)    ● <3%    ● 3-5%    ● 5-10%    ● >10%

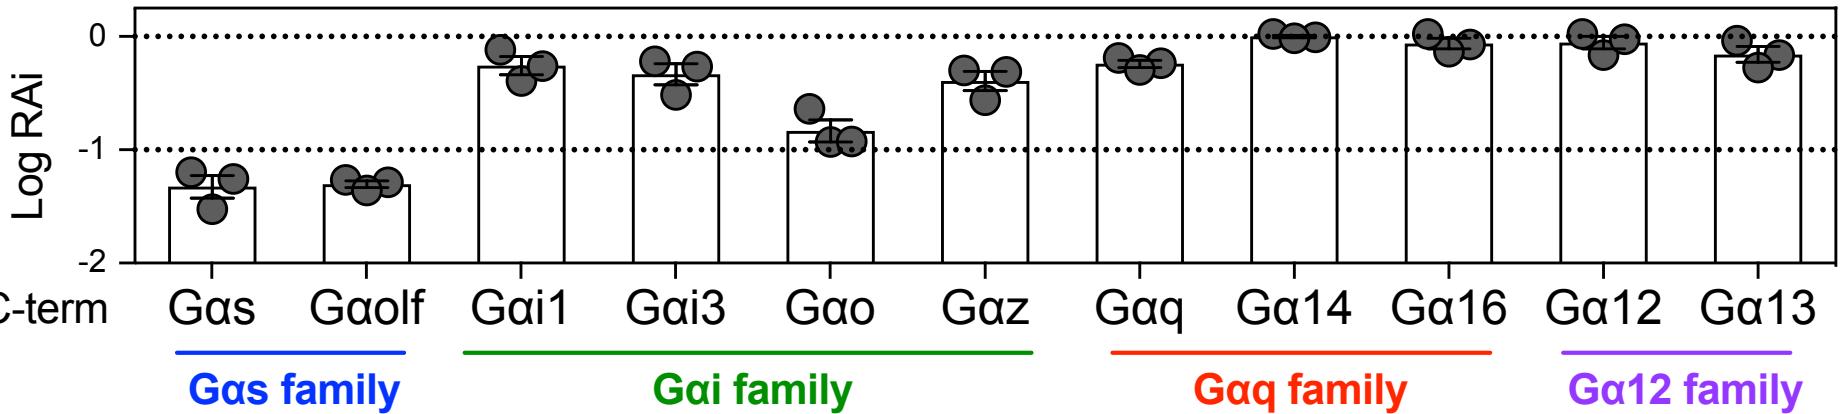

GPCR gene symbol: *HCRTR2*

GPCR name: OX2

Tested ligand: Orexin-A

### C-terminal chimera co-expression

#### Gas family

#### Gai family

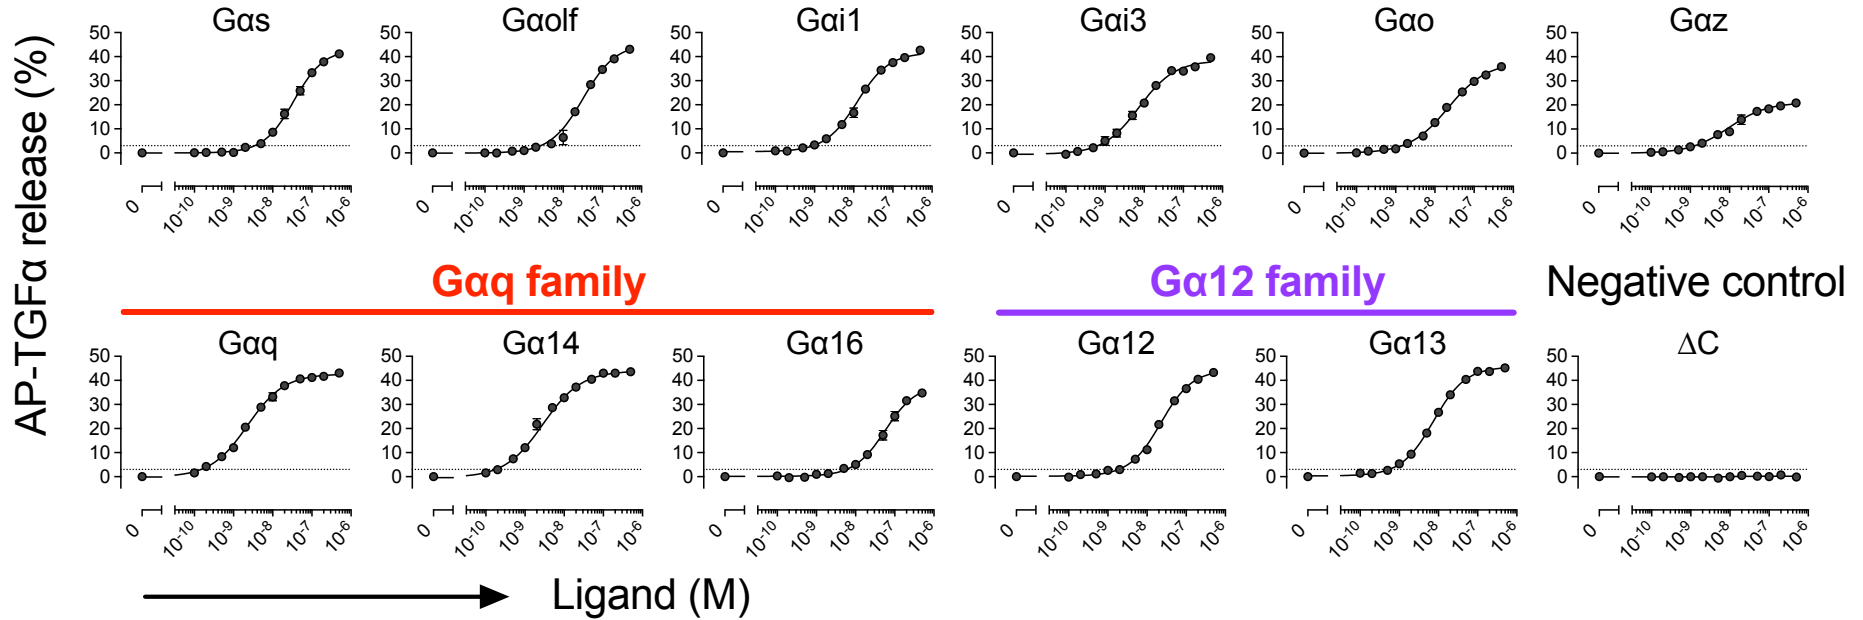

$E_{max}$  (%AP-TGF $\alpha$  release)    ● <3%    ● 3-5%    ● 5-10%    ● >10%

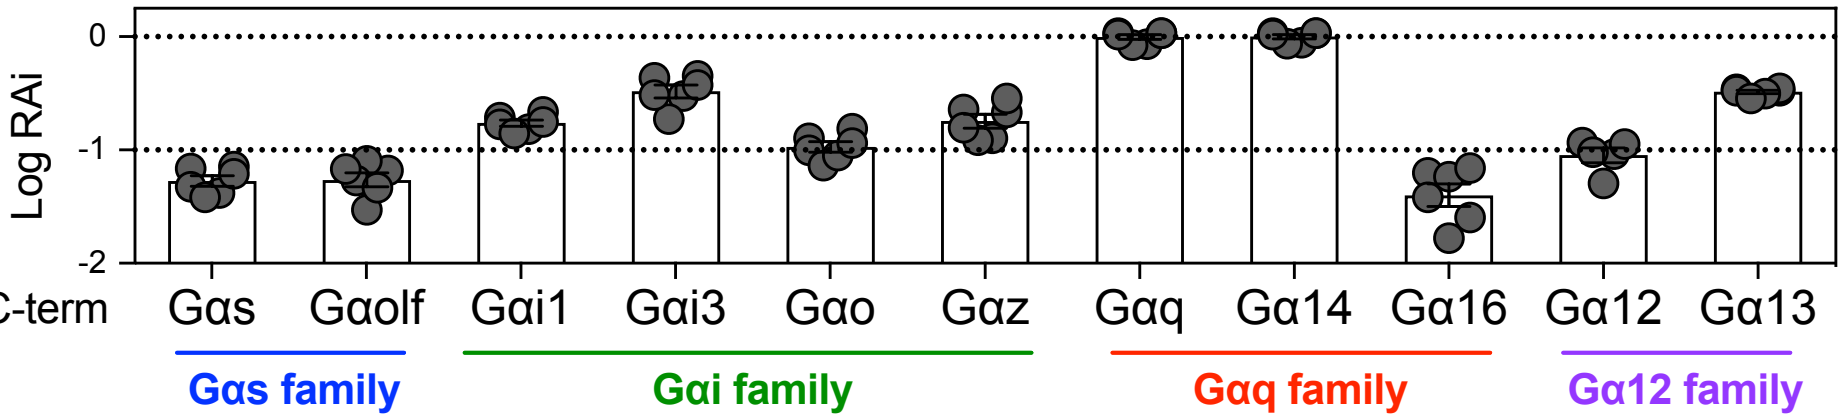

GPCR gene symbol: *HRH1*

GPCR name: H1

Tested ligand: Histamine

### C-terminal chimera co-expression

#### Gas family

#### Gai family

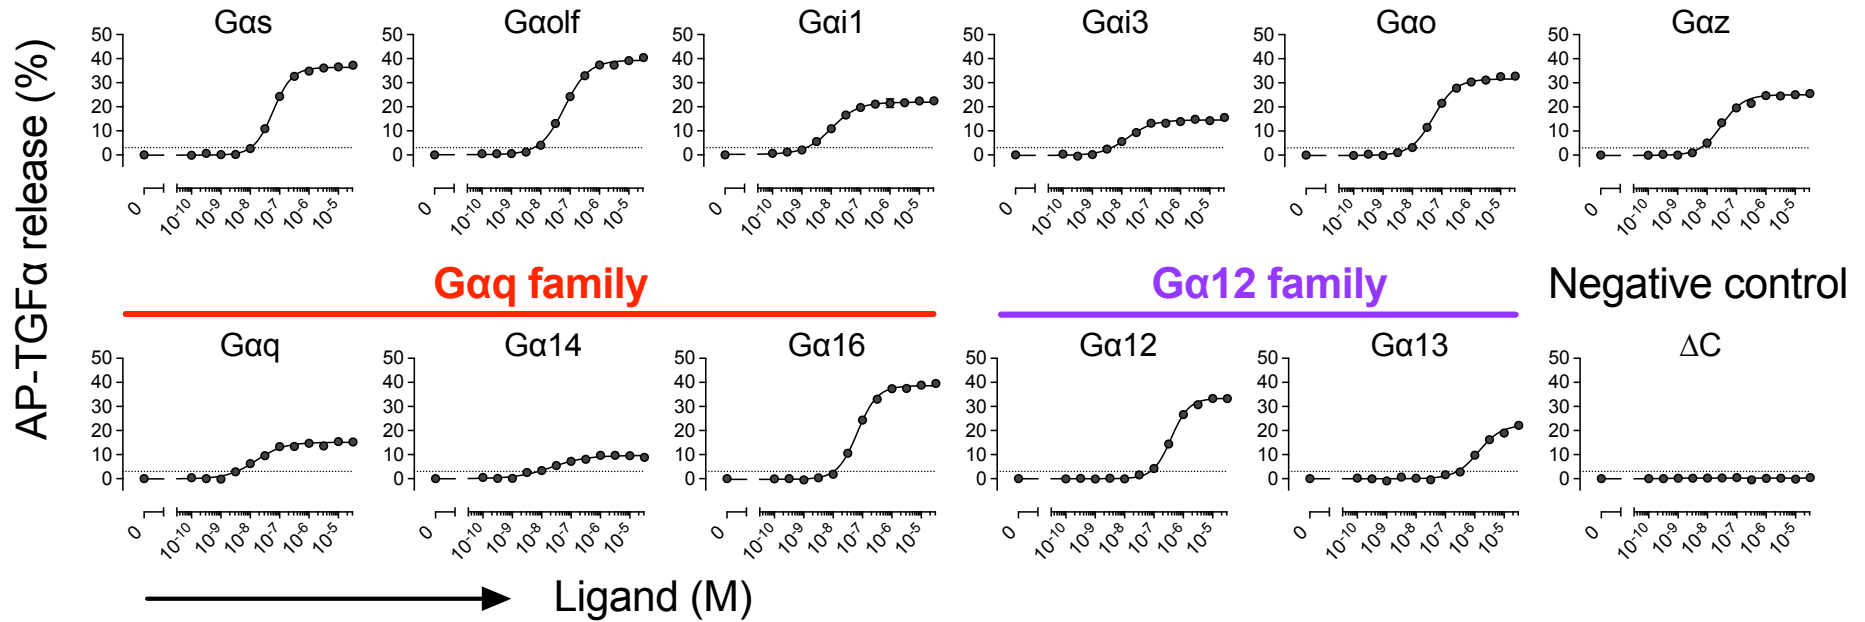

E<sub>max</sub> (%AP-TGFα release)

● <3%   ● 3-5%   ● 5-10%   ● >10%

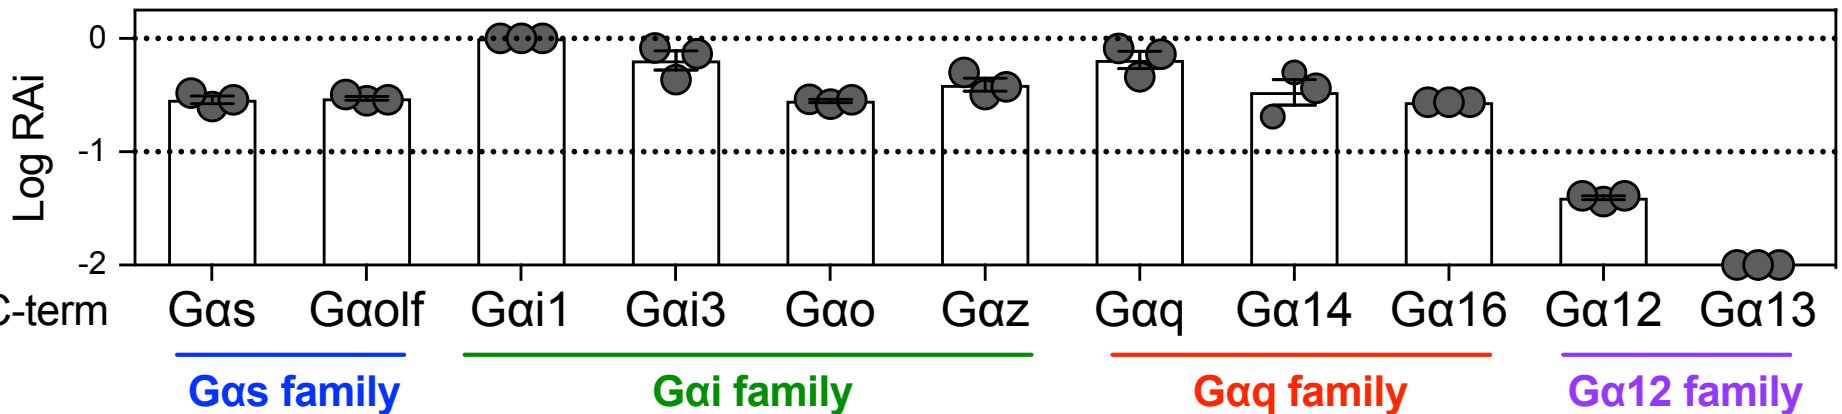

GPCR gene symbol: *HRH2*

GPCR name: H2

Tested ligand: Histamine

### C-terminal chimera co-expression

#### Gas family

#### Gai family

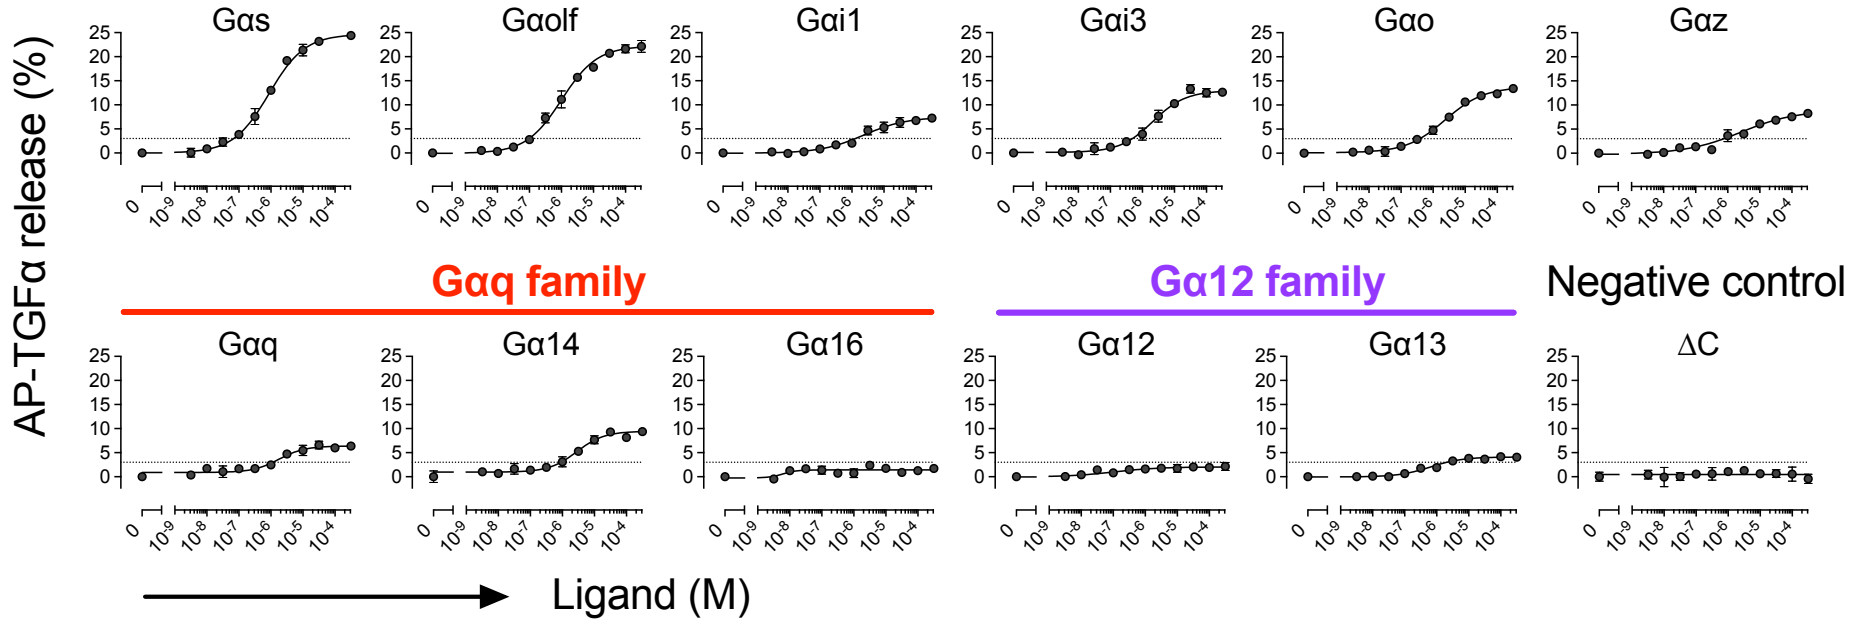

$E_{max}$  (%AP-TGFα release)    ● <3%    ● 3-5%    ● 5-10%    ● >10%

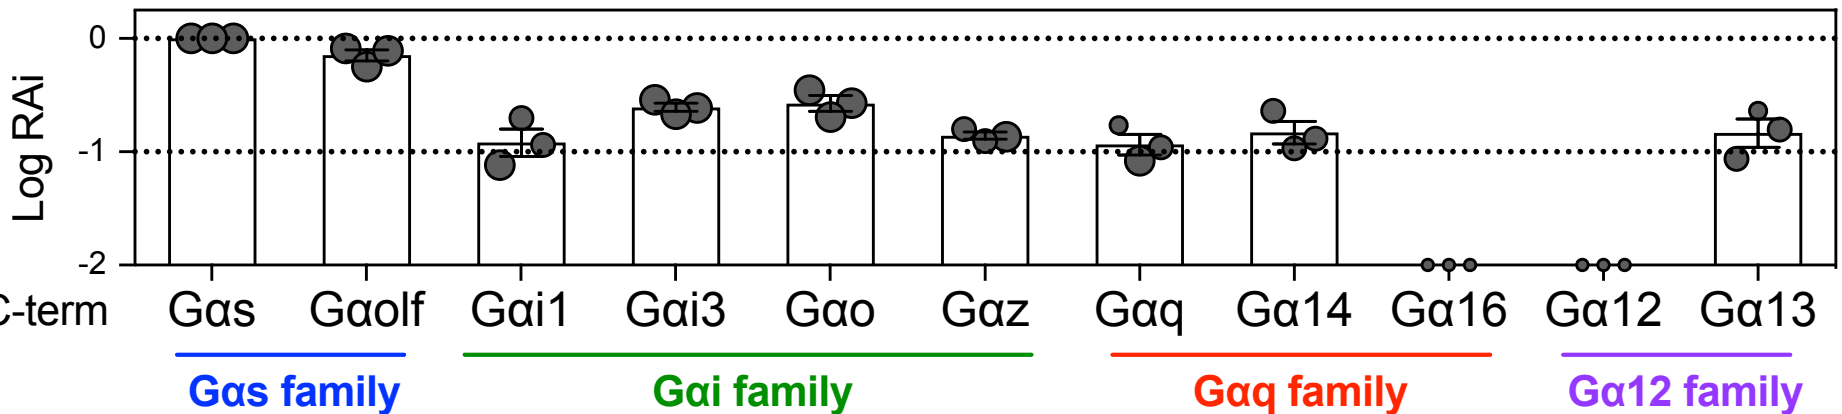

GPCR gene symbol: *HRH3*

GPCR name: H3

Tested ligand: Histamine

### C-terminal chimera co-expression

#### Gas family

#### Gai family

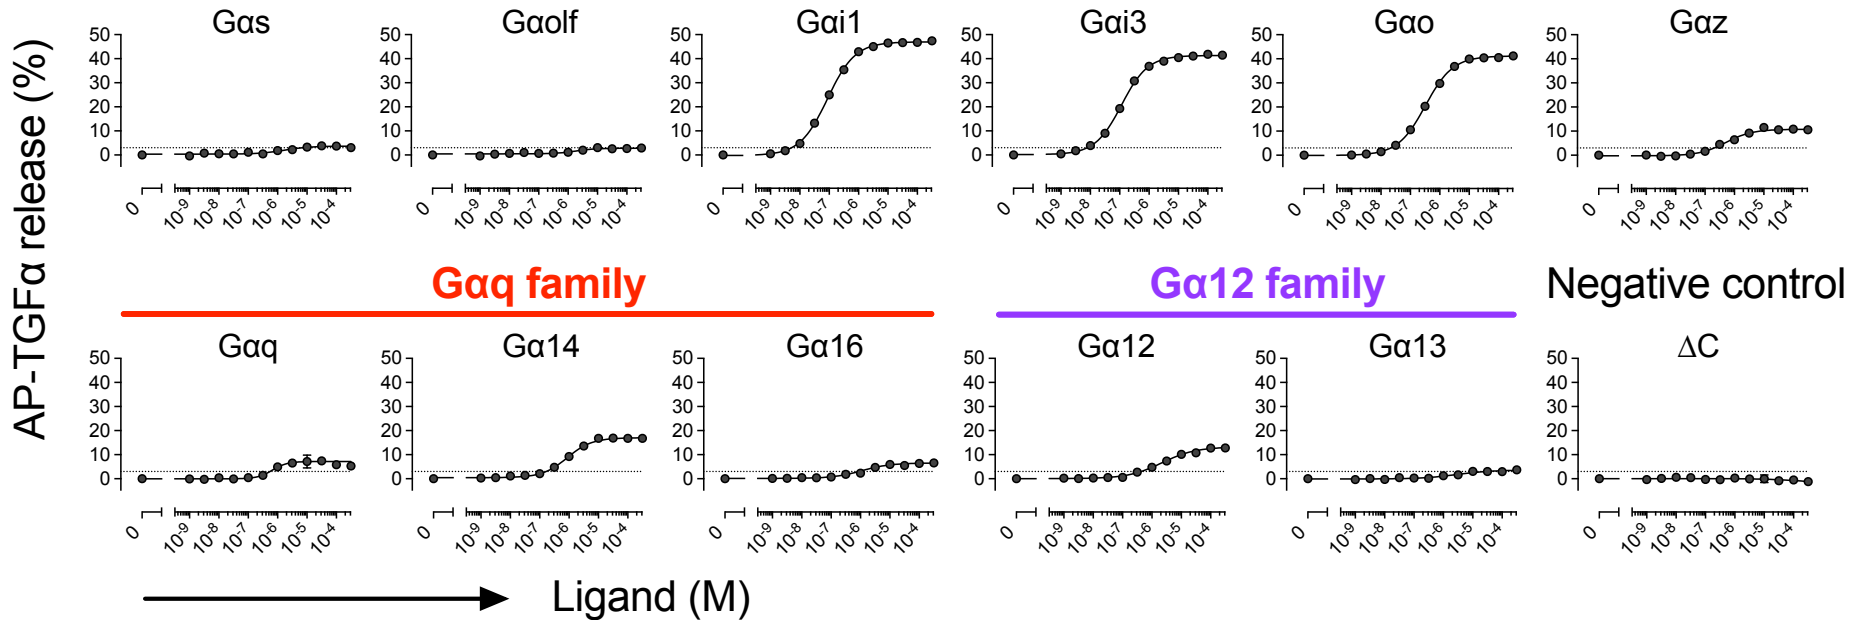

$E_{max}$  (%AP-TGFα release)    ● <3%    ● 3-5%    ● 5-10%    ● >10%

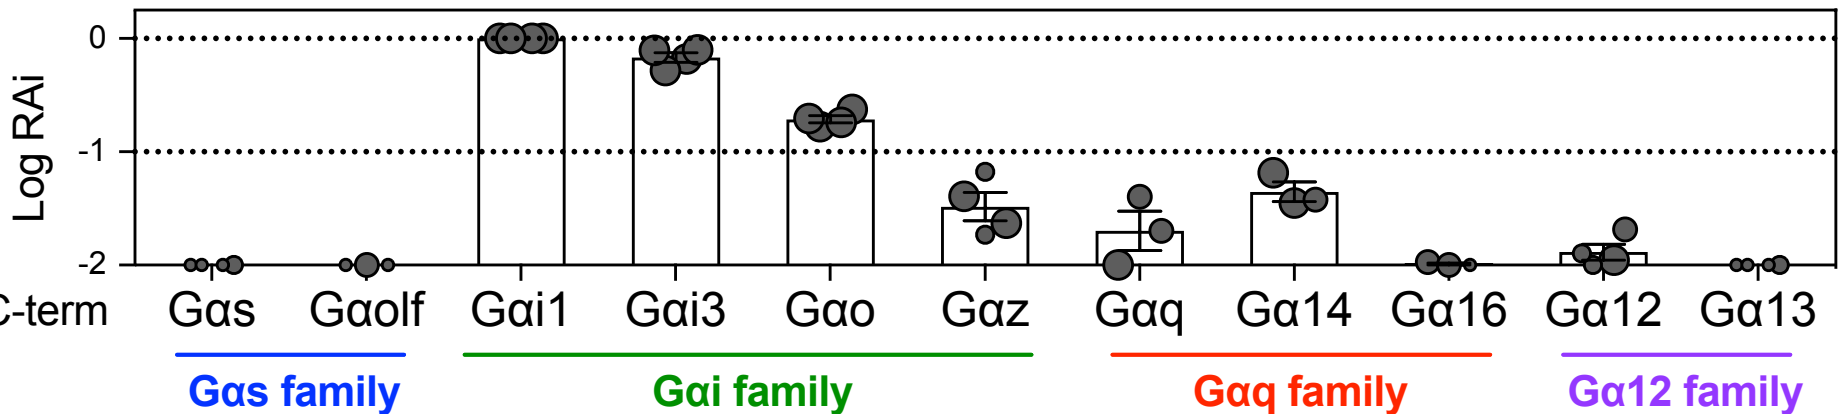

GPCR gene symbol: *HRH4*

GPCR name: H4

Tested ligand: Histamine

### C-terminal chimera co-expression

#### Gas family

#### Gai family

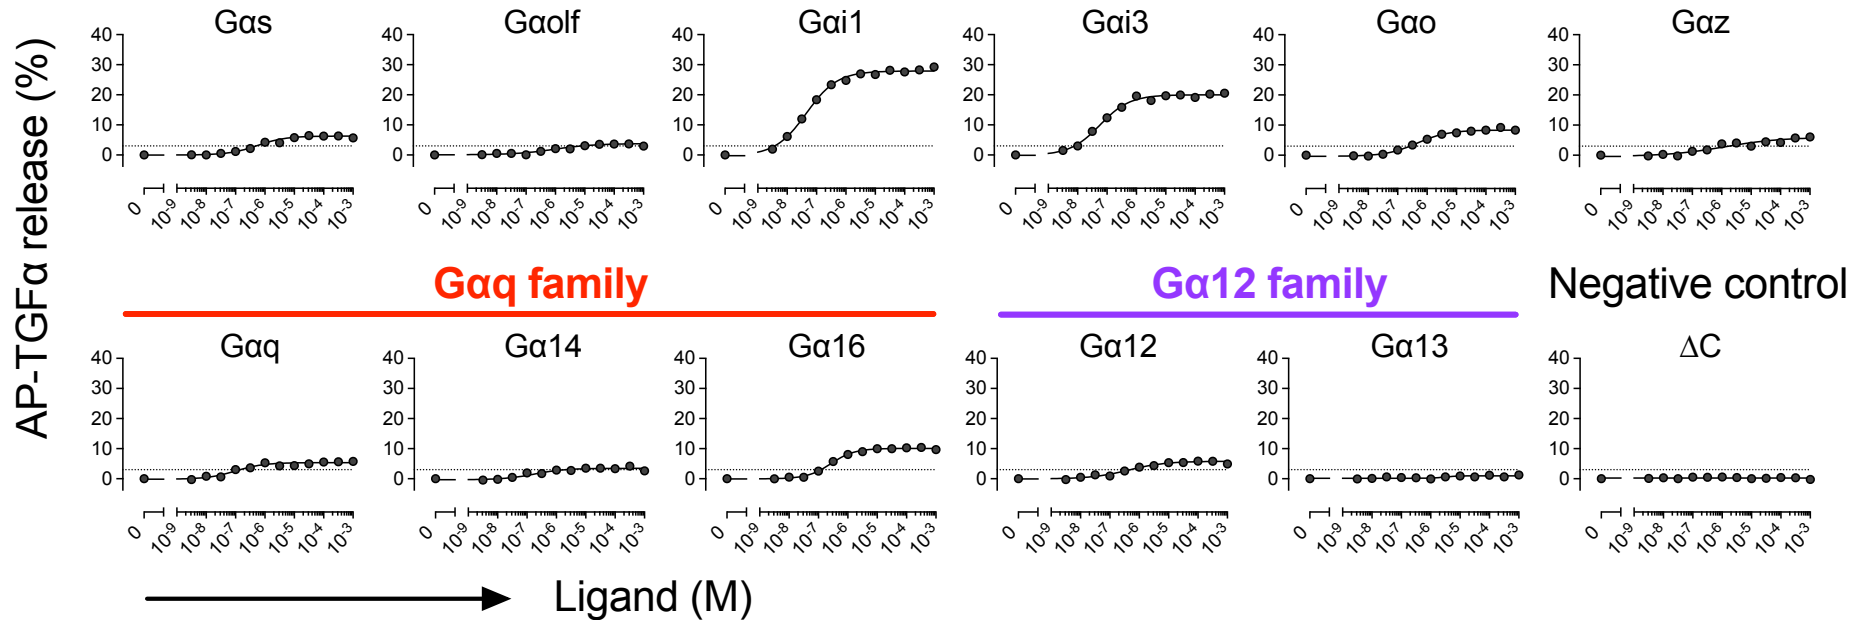

$E_{max}$  (%AP-TGFα release)

● <3%   ● 3-5%   ● 5-10%   ● >10%

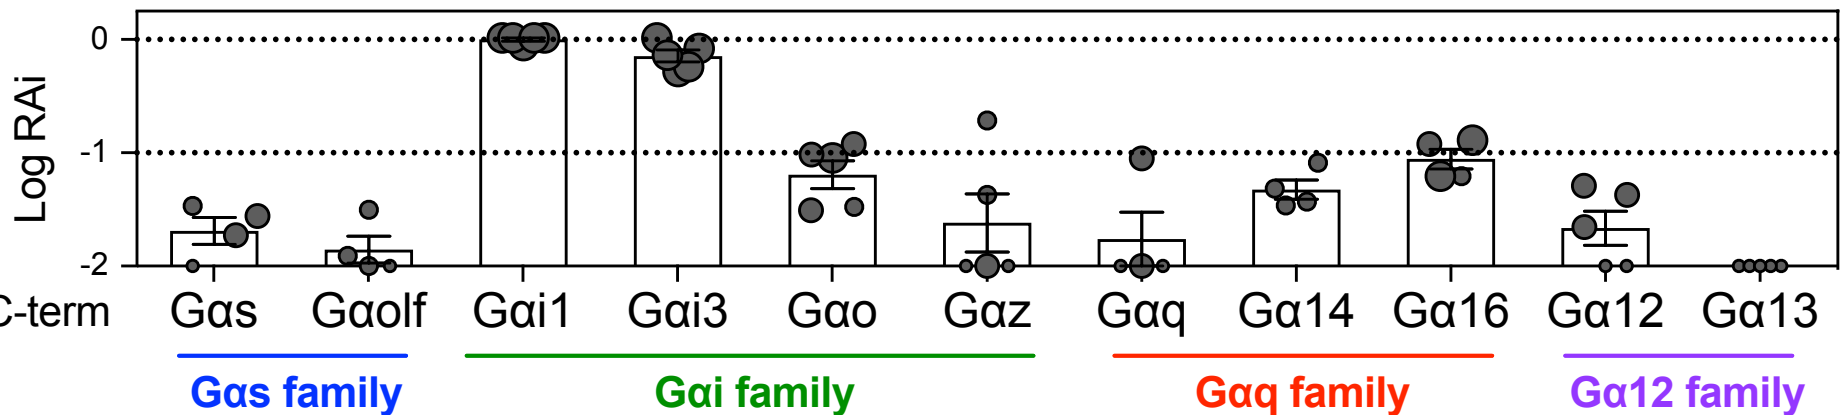

GPCR gene symbol: *HTR1A*

GPCR name: 5-HT1A

Tested ligand: Serotonin

### C-terminal chimera co-expression

#### Gas family

#### Gai family

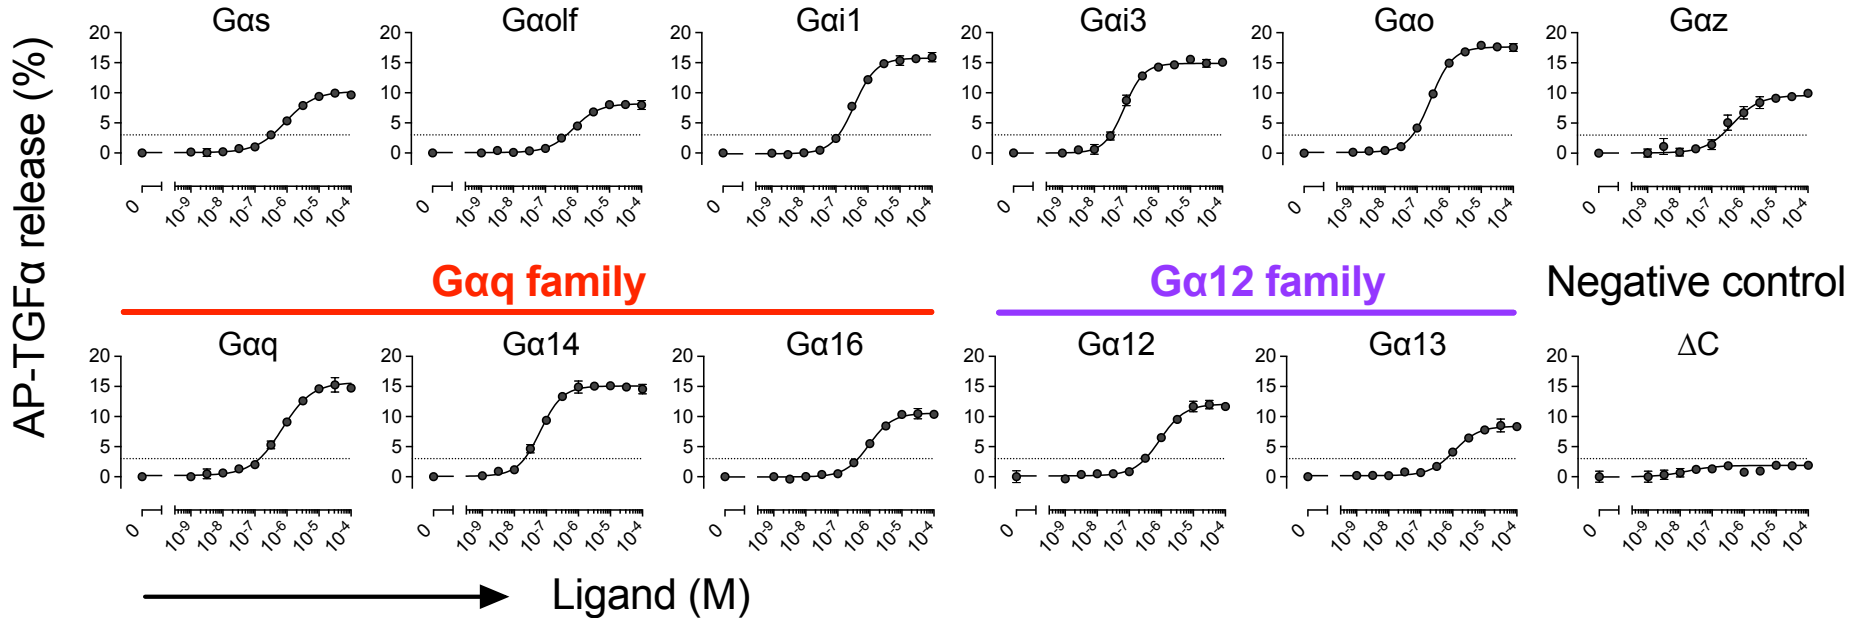

$E_{max}$  (%AP-TGFα release)

● <3%   ● 3-5%   ● 5-10%   ● >10%

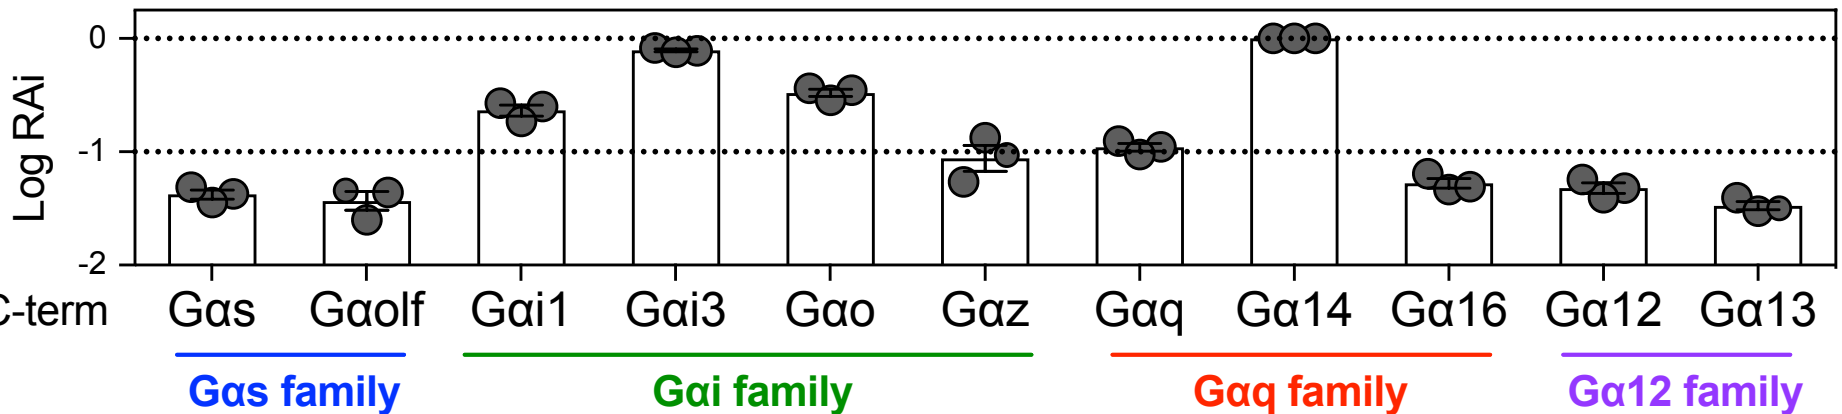



GPCR gene symbol: *HTR1B*

GPCR name: 5-HT1B

Tested ligand: Serotonin

### C-terminal chimera co-expression

#### Gas family

#### Gai family

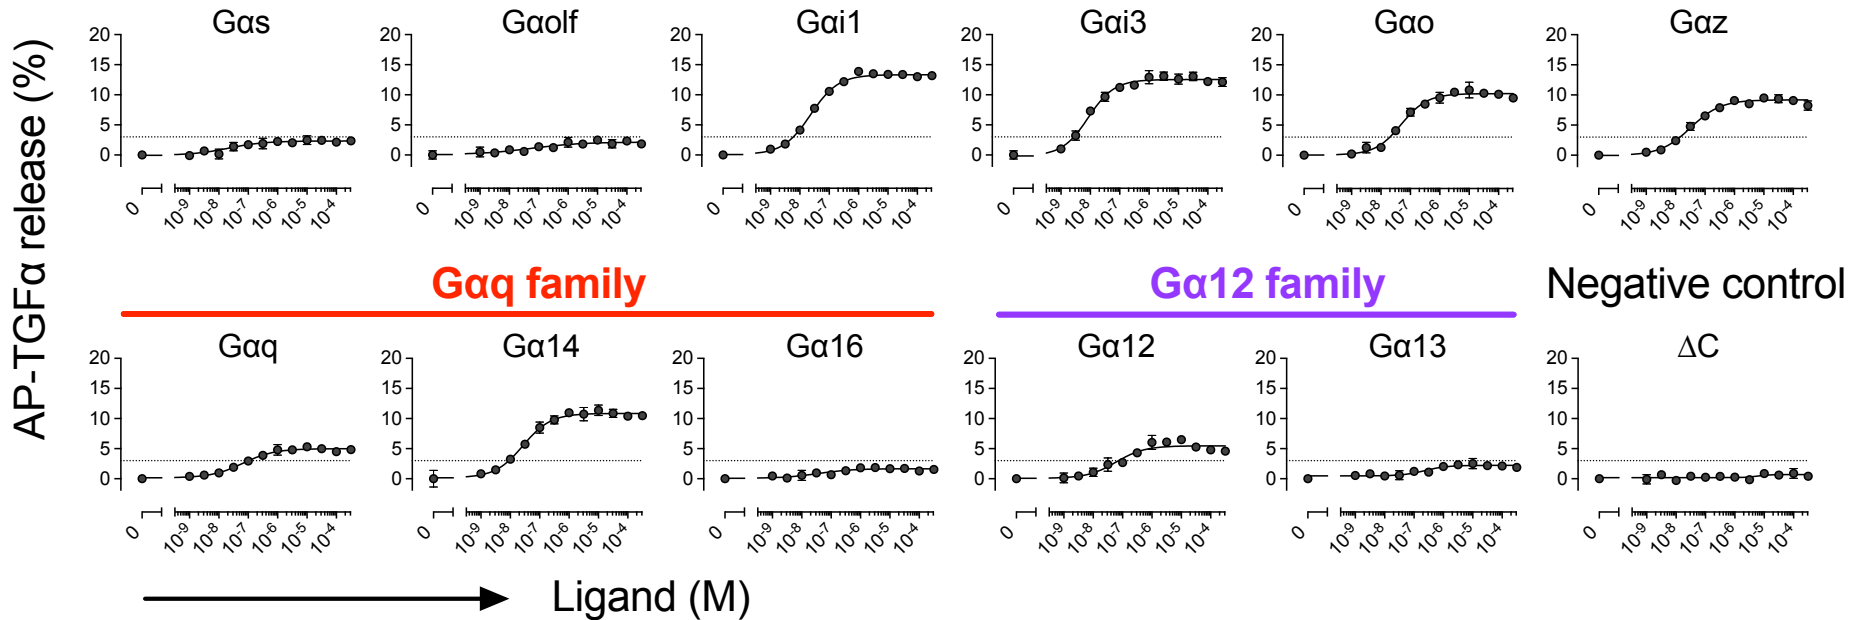

$E_{max}$  (%AP-TGFα release)

● <3%   ● 3-5%   ● 5-10%   ● >10%

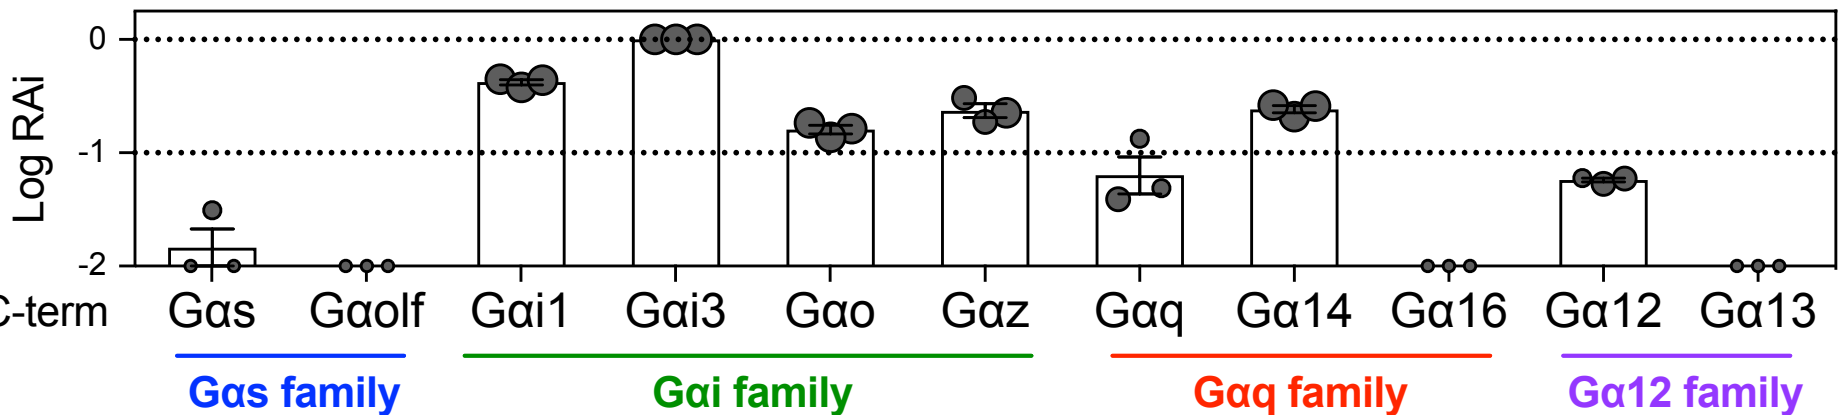

GPCR gene symbol: *HTR1D*

GPCR name: 5-HT1D

Tested ligand: Serotonin

### C-terminal chimera co-expression

#### Gas family

#### Gai family

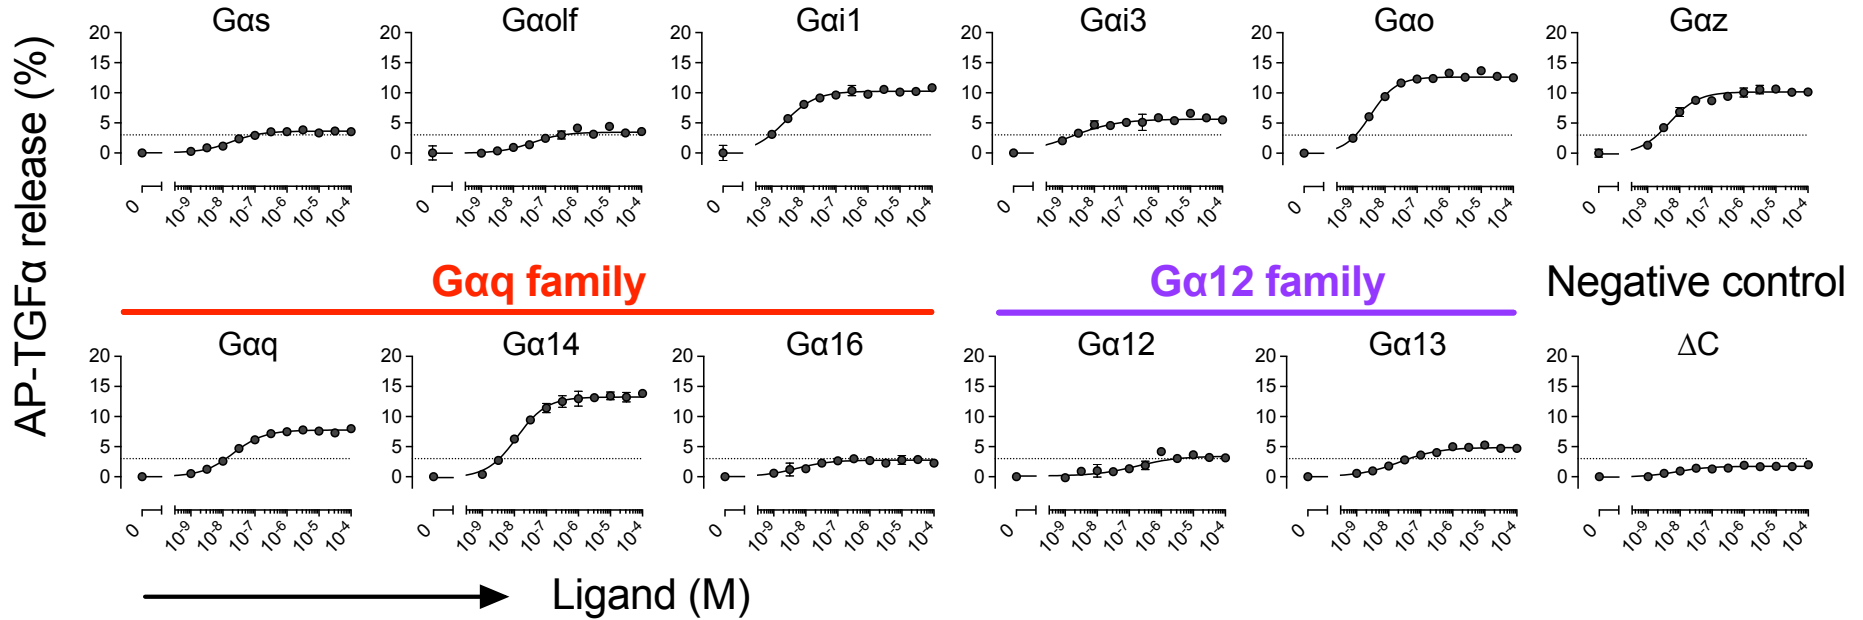

$E_{max}$  (%AP-TGFα release)

● <3%   ● 3-5%   ● 5-10%   ● >10%

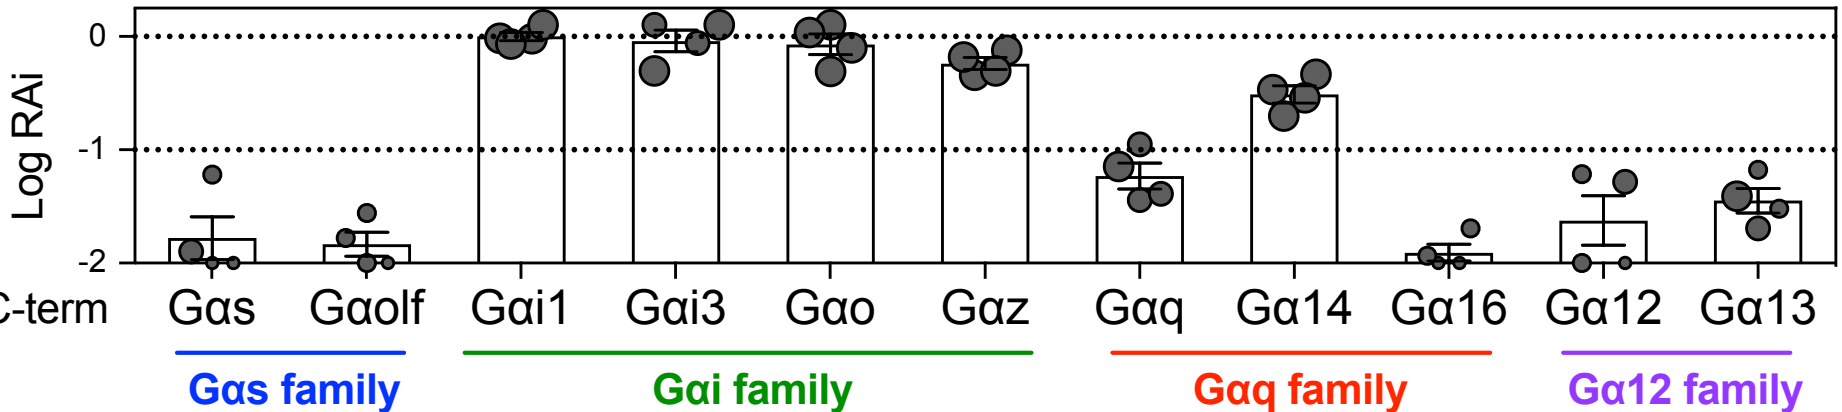

GPCR gene symbol: *HTR1E*

GPCR name: 5-HT1E

Tested ligand: Serotonin

### C-terminal chimera co-expression

#### Gas family

#### Gai family

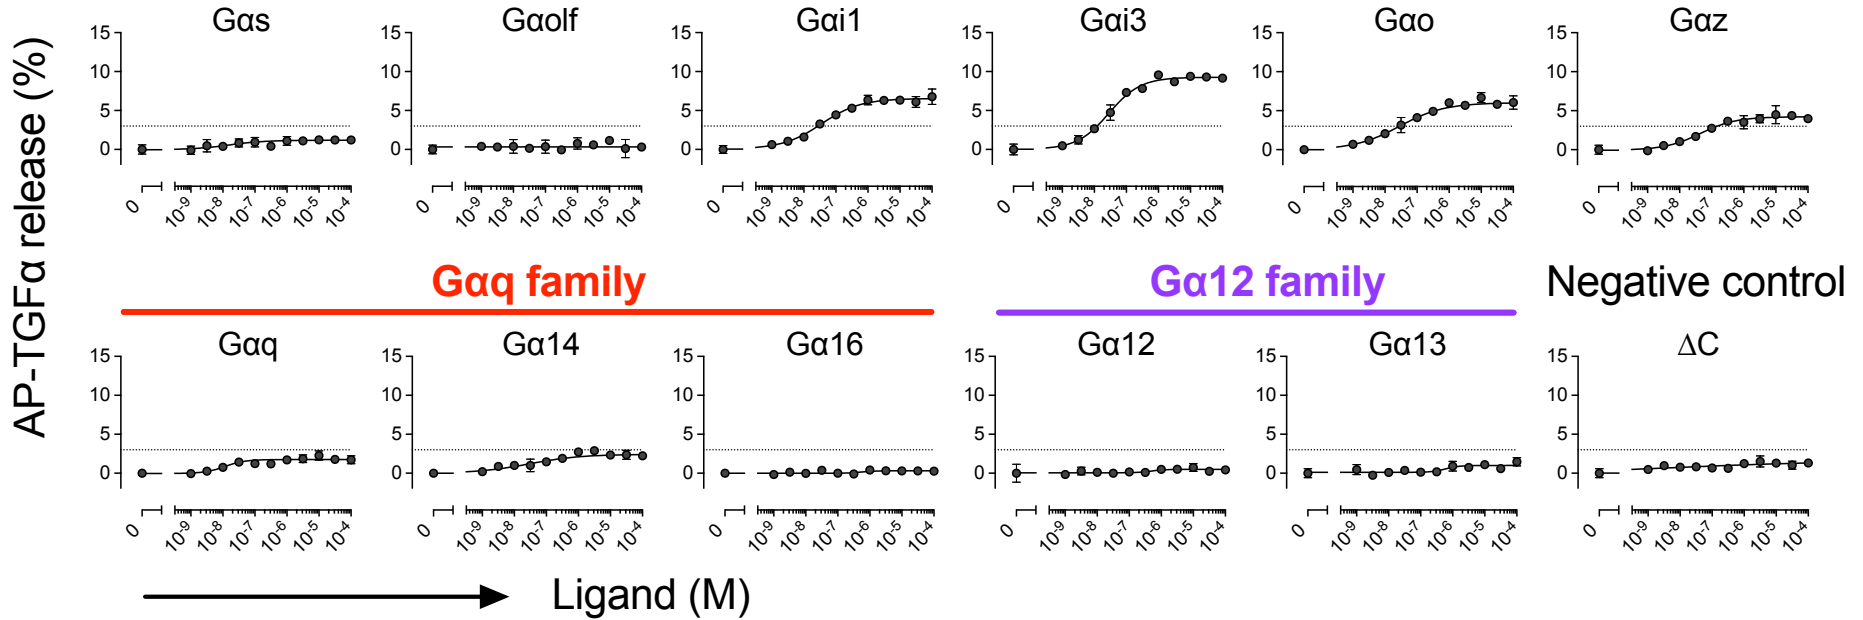

$E_{max}$  (%AP-TGFα release)    ● <3%    ● 3-5%    ● 5-10%    ● >10%

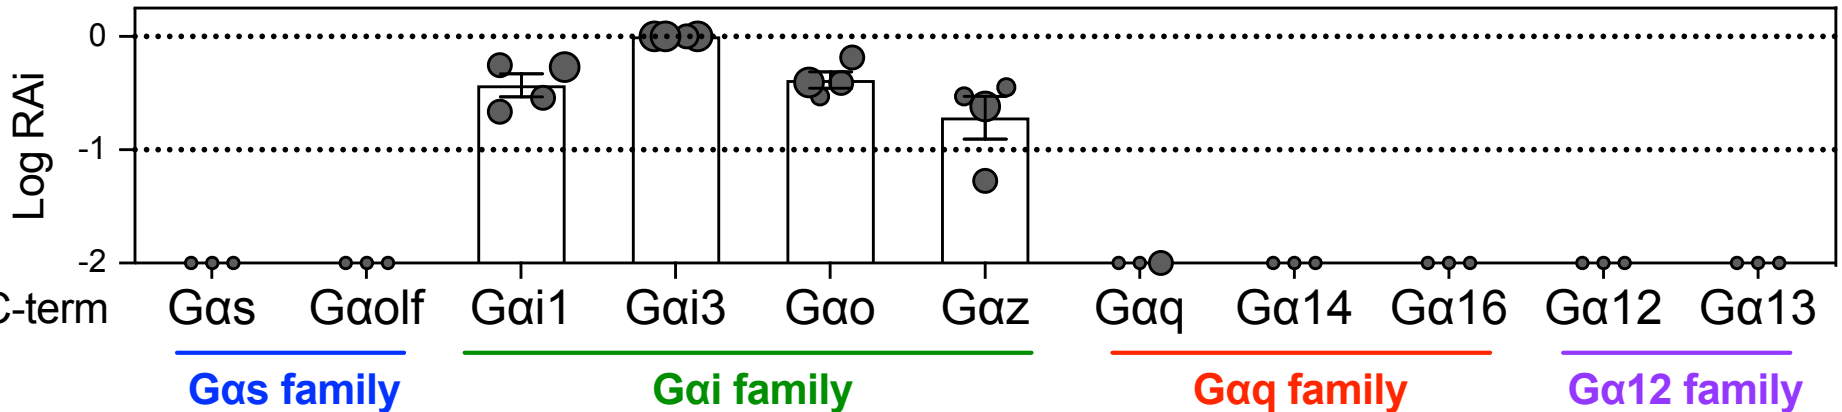

GPCR gene symbol: *HTR1F*

GPCR name: 5-HT1F

Tested ligand: Serotonin

### C-terminal chimera co-expression

#### Gas family

#### Gai family

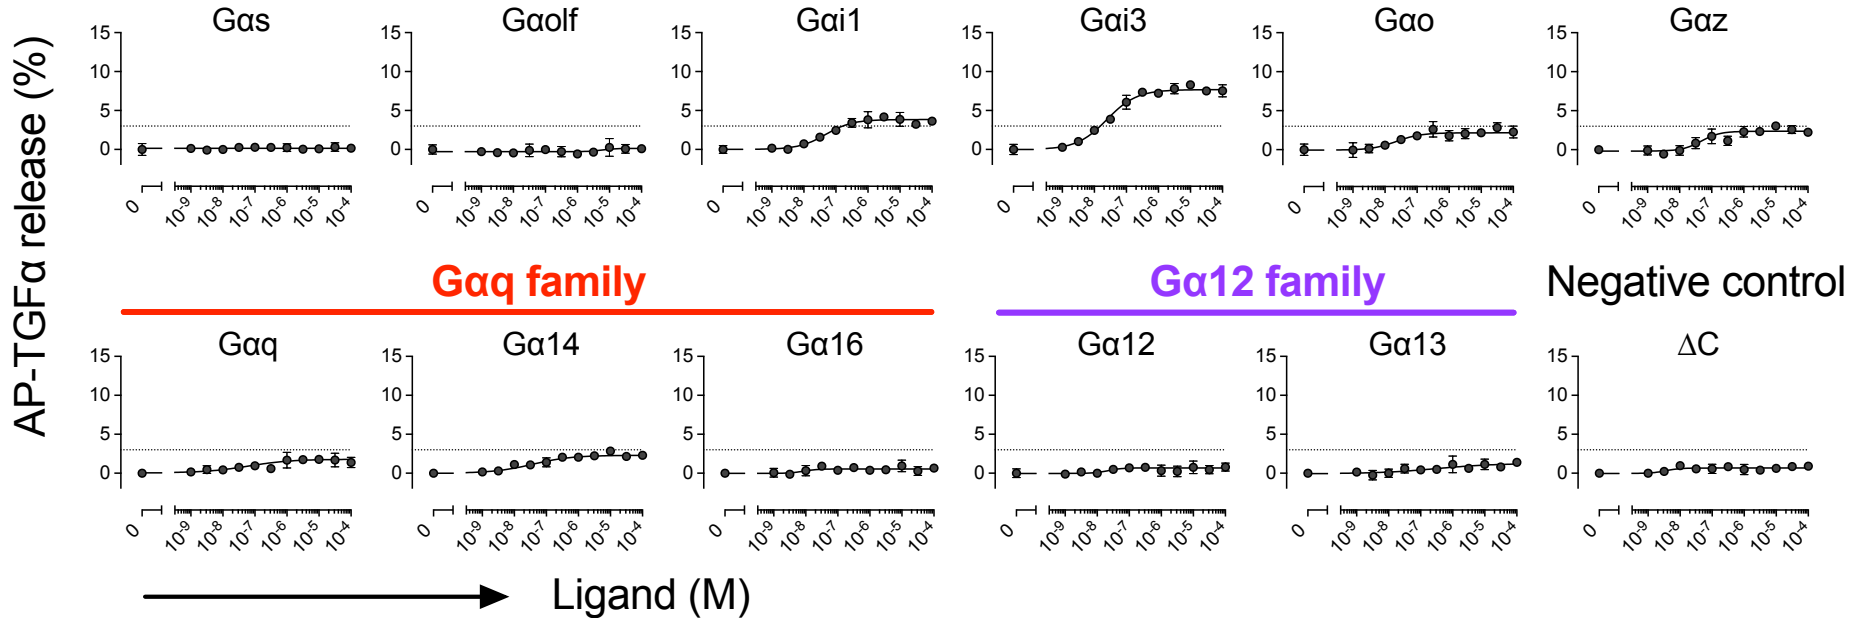

$E_{max}$  (%AP-TGFα release)    ● <3%    ● 3-5%    ● 5-10%    ● >10%

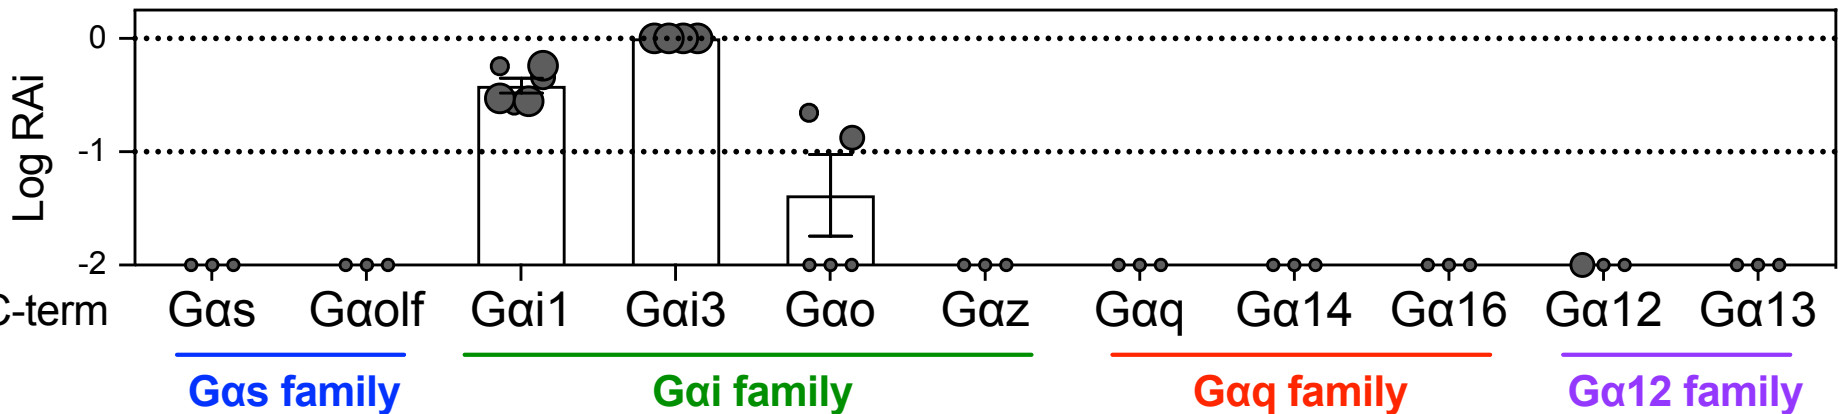

GPCR gene symbol: *HTR2A*

GPCR name: 5-HT2A

Tested ligand: Serotonin

### C-terminal chimera co-expression

#### Gas family

#### Gai family

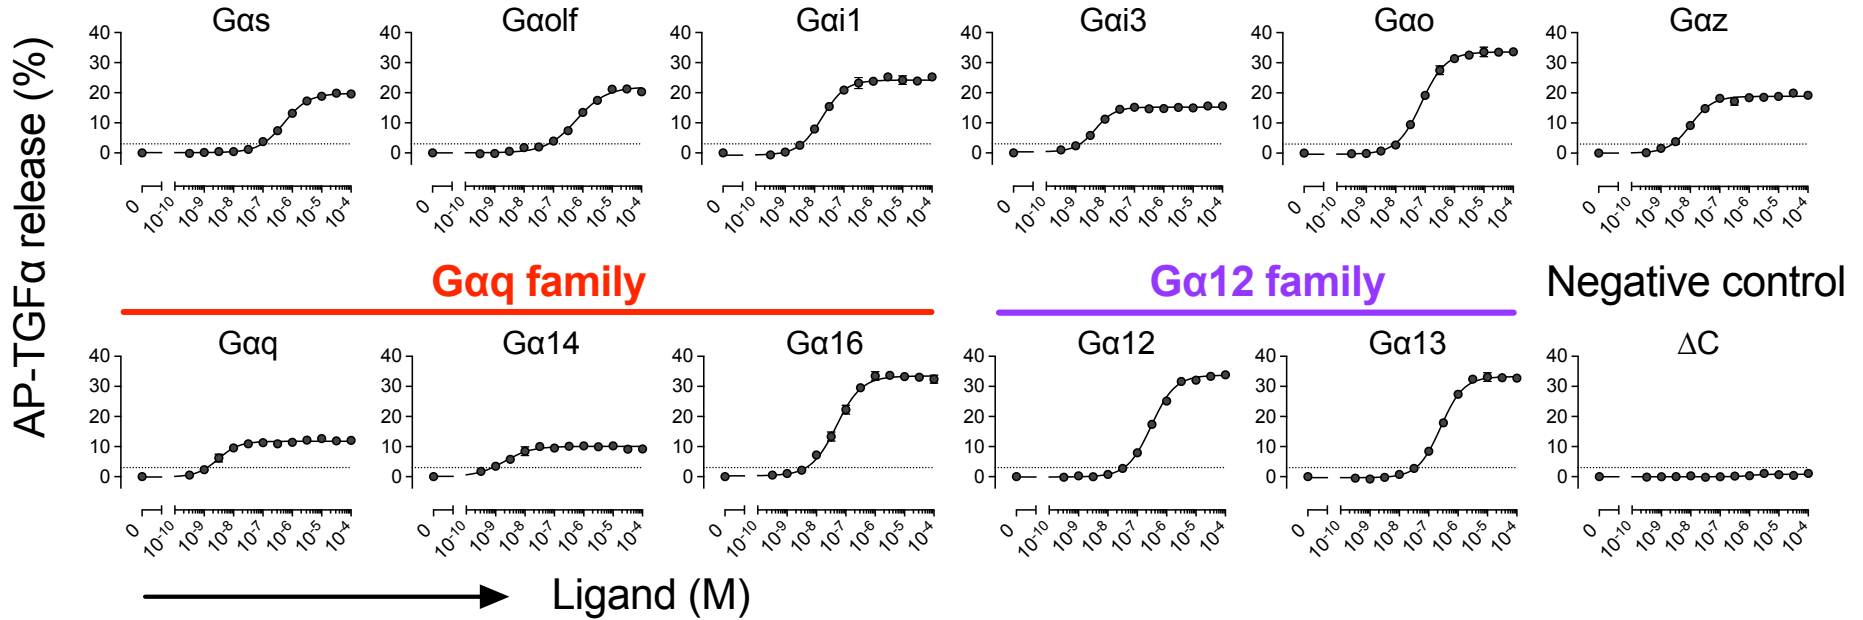

$E_{max}$  (%AP-TGFα release)

● <3%   ● 3-5%   ● 5-10%   ● >10%

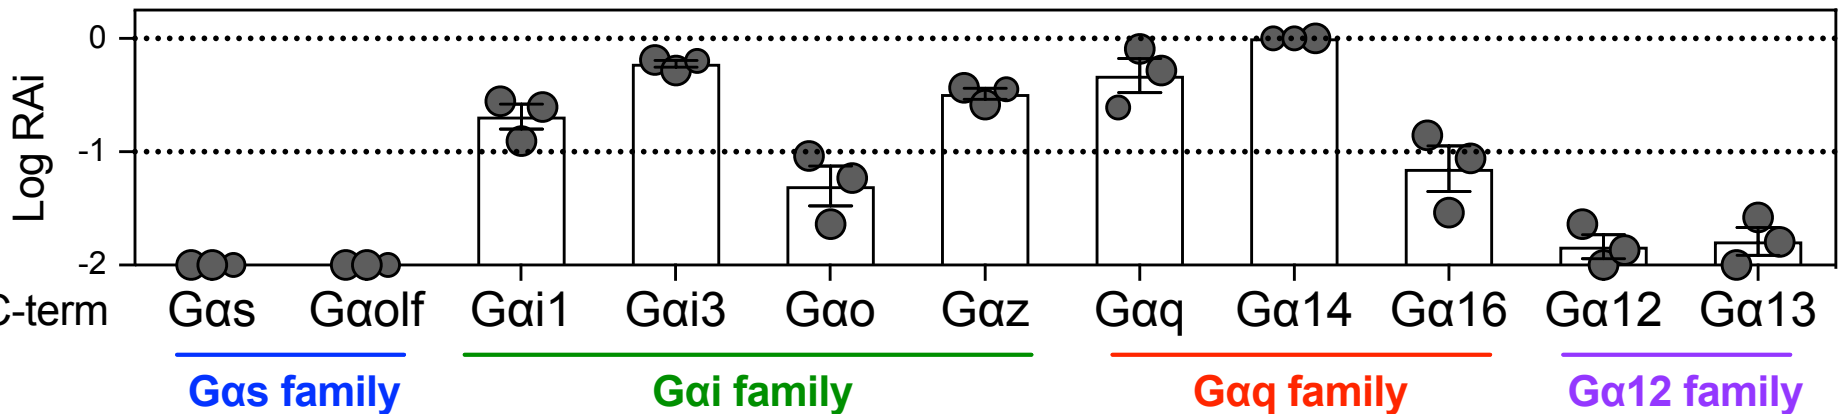

GPCR gene symbol: *HTR2B*

GPCR name: 5-HT2B

Tested ligand: Serotonin

### C-terminal chimera co-expression

#### Gas family

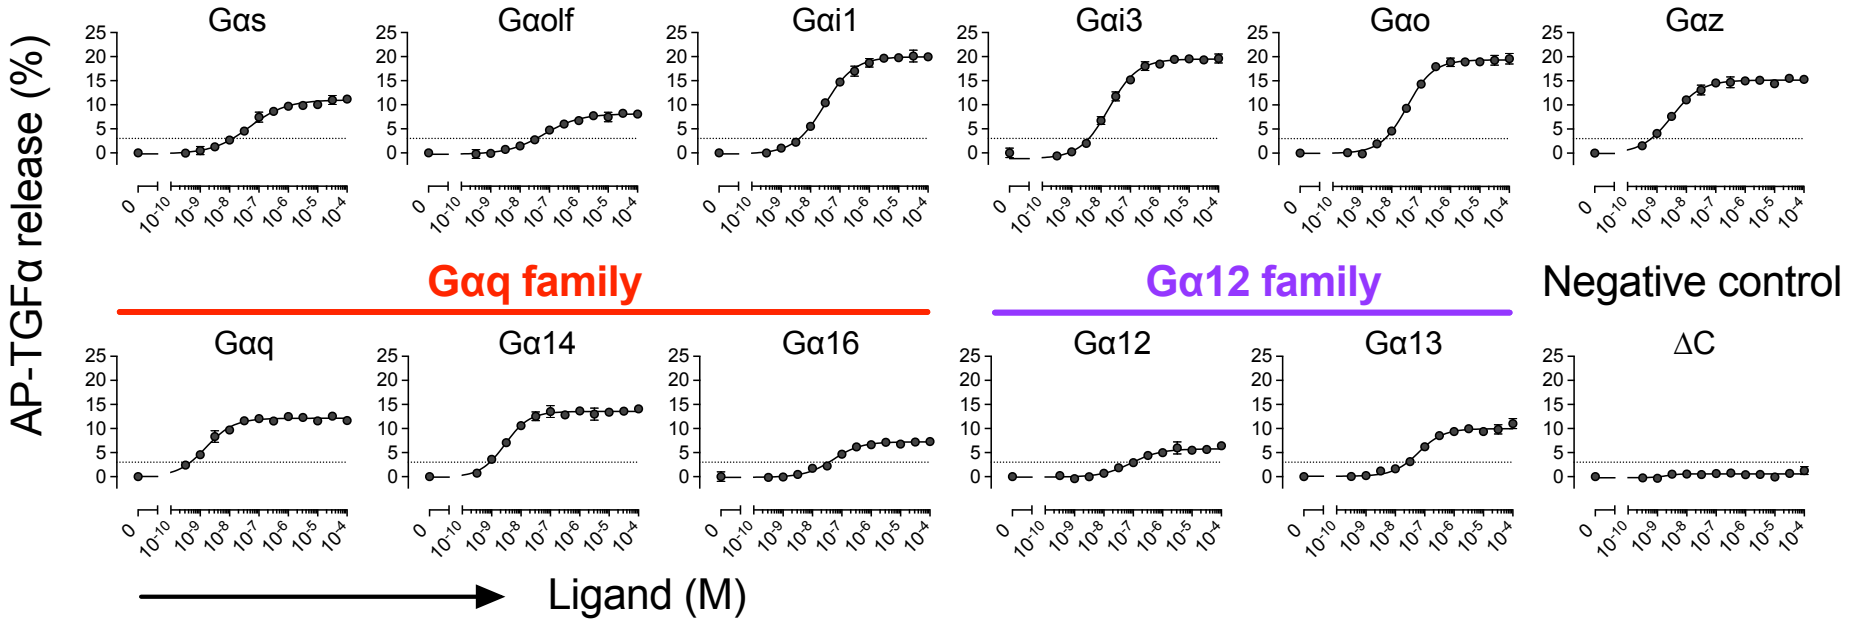

$E_{max}$  (%AP-TGF $\alpha$  release)    ● <3%    ● 3-5%    ● 5-10%    ● >10%

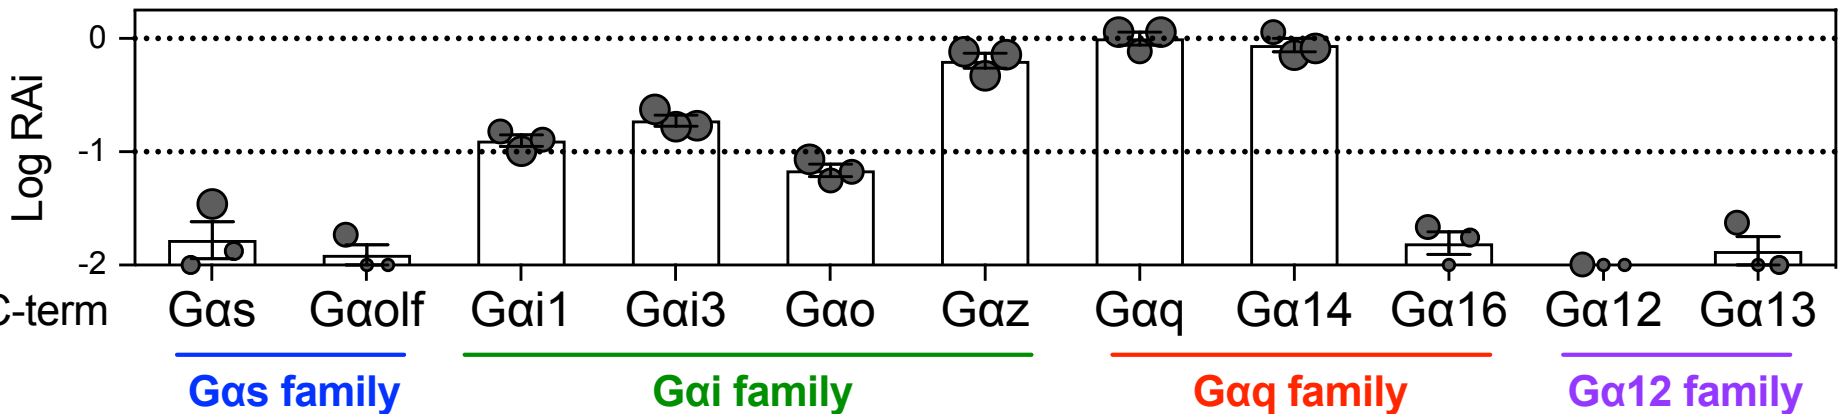

GPCR gene symbol: *HTR2C*

GPCR name: 5-HT<sub>2C</sub>

Tested ligand: Serotonin

### C-terminal chimera co-expression

#### Gas family

#### Gai family

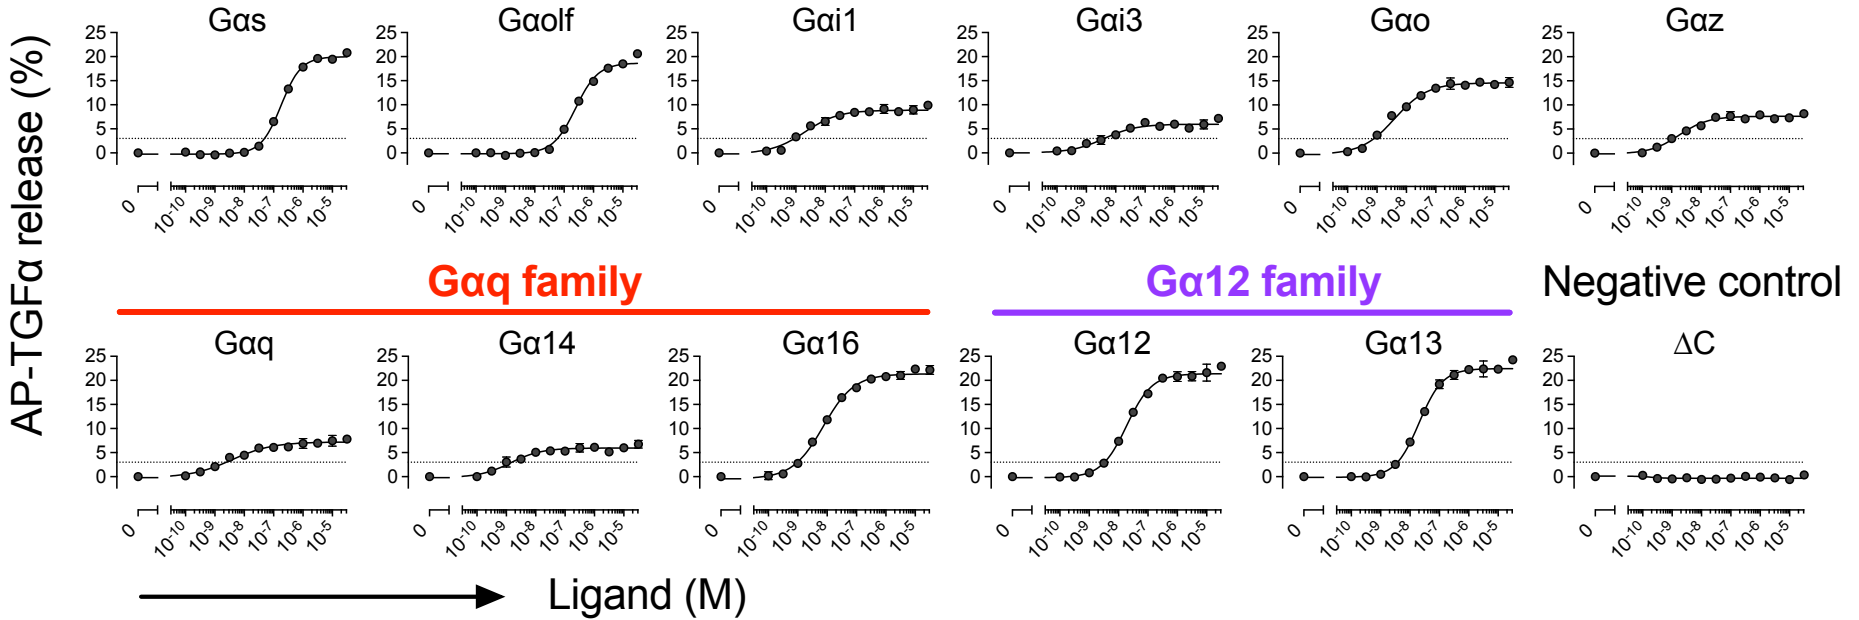

$E_{max}$  (%AP-TGF $\alpha$  release)    ● <3%    ● 3-5%    ● 5-10%    ● >10%

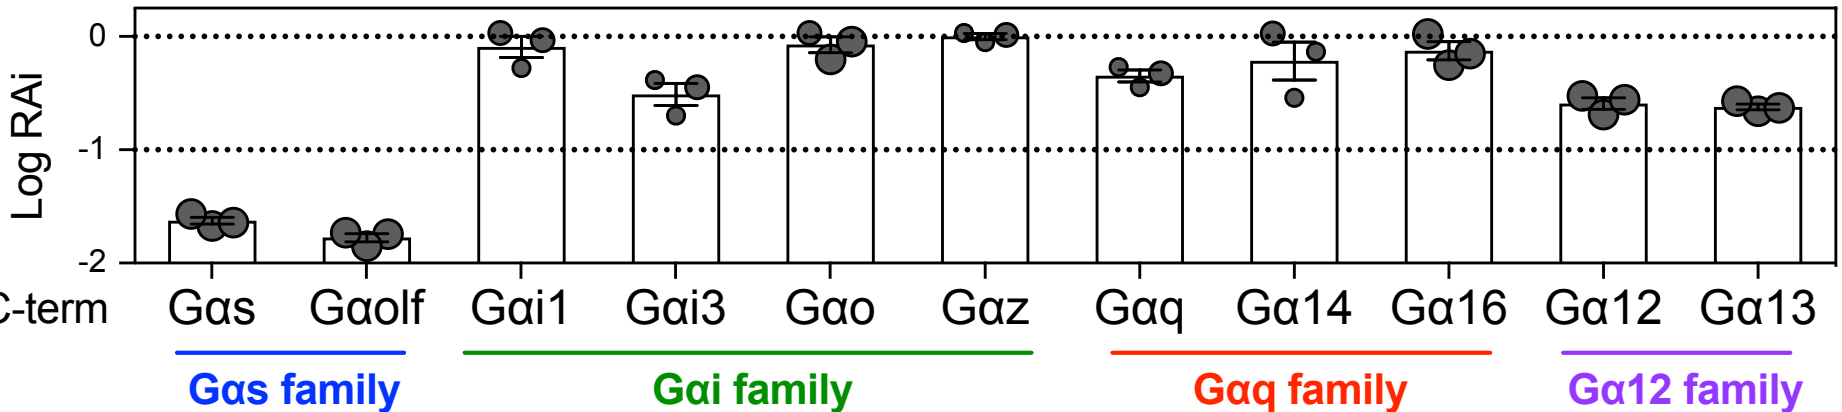

GPCR gene symbol: *HTR4*

GPCR name: 5-HT<sub>4</sub>

Tested ligand: Serotonin

### C-terminal chimera co-expression

#### Gas family

#### Gai family

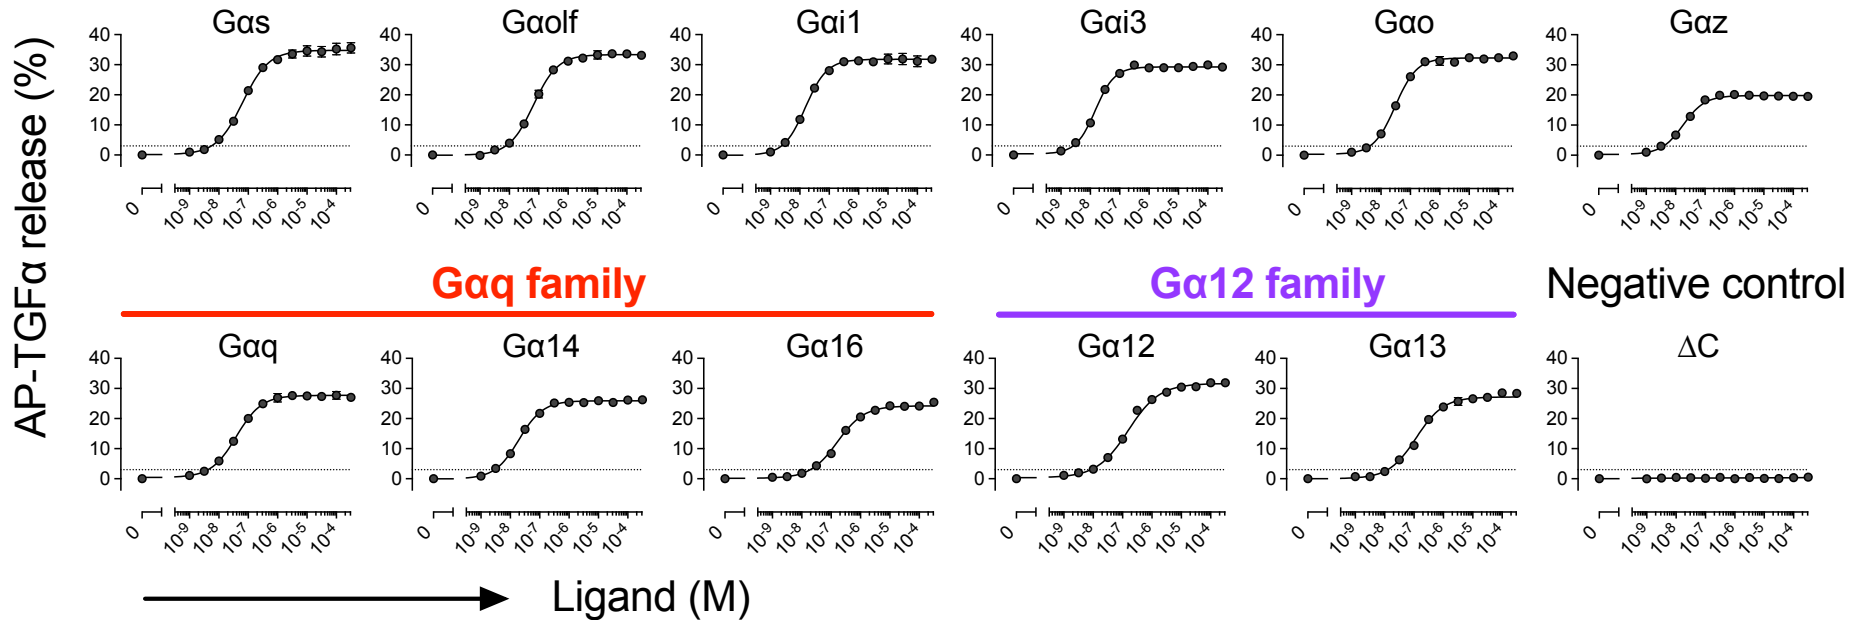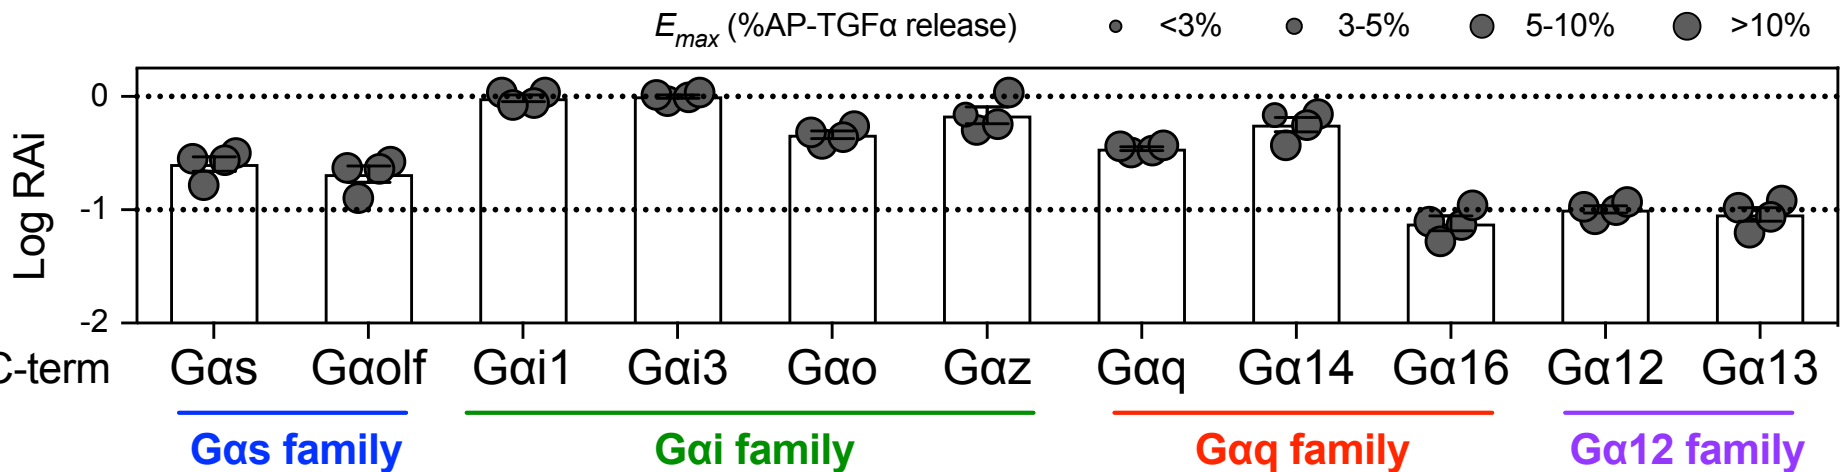



GPCR gene symbol: *HTR6*

GPCR name: 5-HT<sub>6</sub>

Tested ligand: Serotonin

### C-terminal chimera co-expression

#### Gas family

#### Gai family

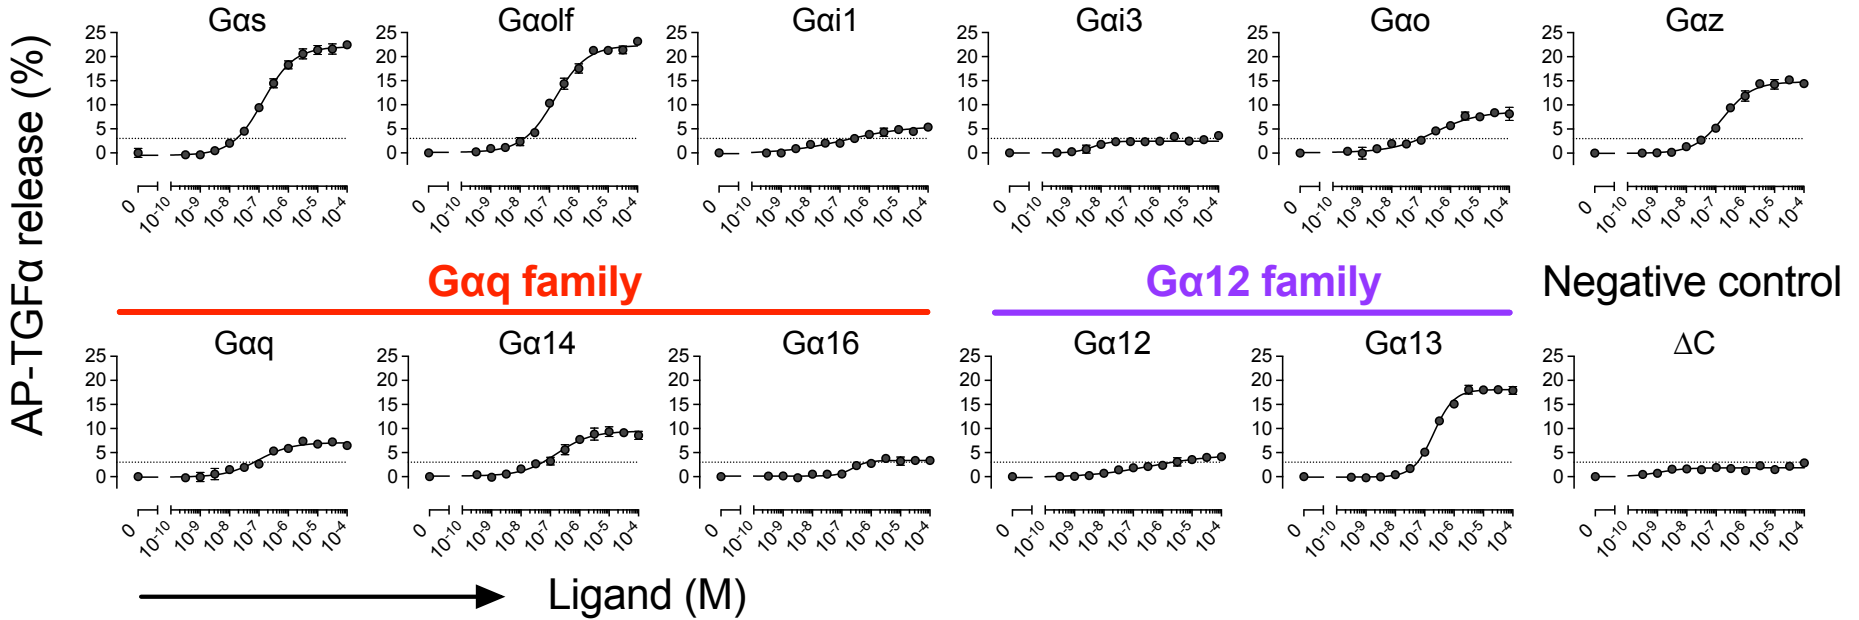

$E_{max}$  (%AP-TGF $\alpha$  release)    ● <3%    ● 3-5%    ● 5-10%    ● >10%

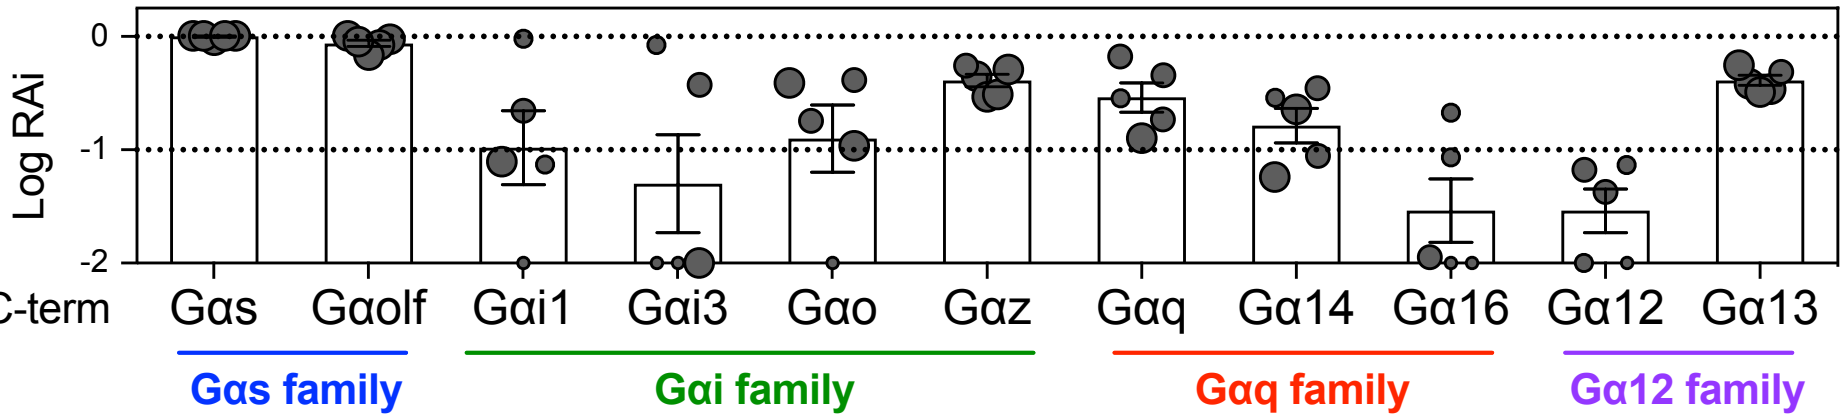

GPCR gene symbol: *HTR7*

GPCR name: 5-HT7

Tested ligand: Serotonin

### C-terminal chimera co-expression

#### Gas family

#### Gai family

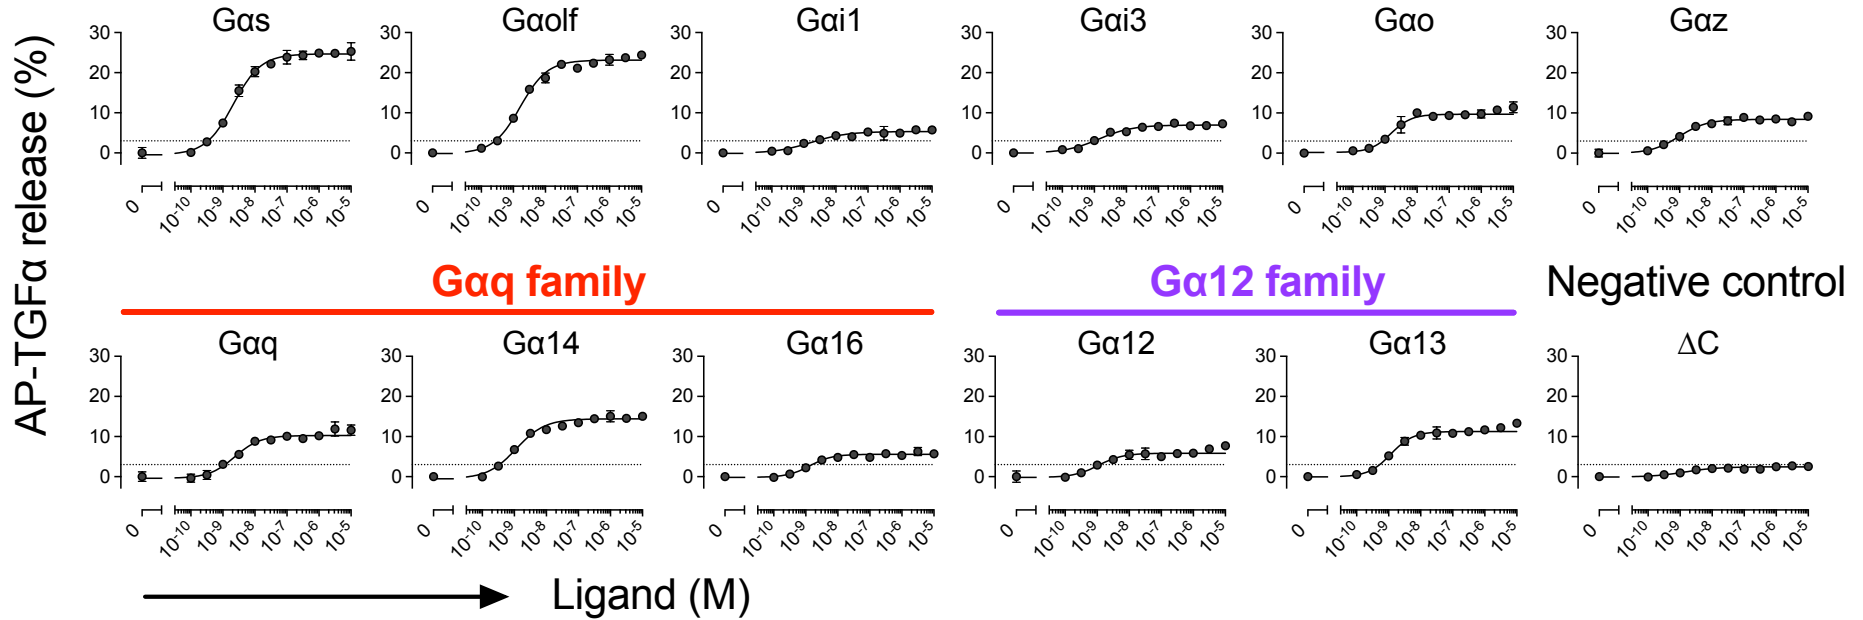

$E_{max}$  (%AP-TGFα release)    ● <3%    ● 3-5%    ● 5-10%    ● >10%

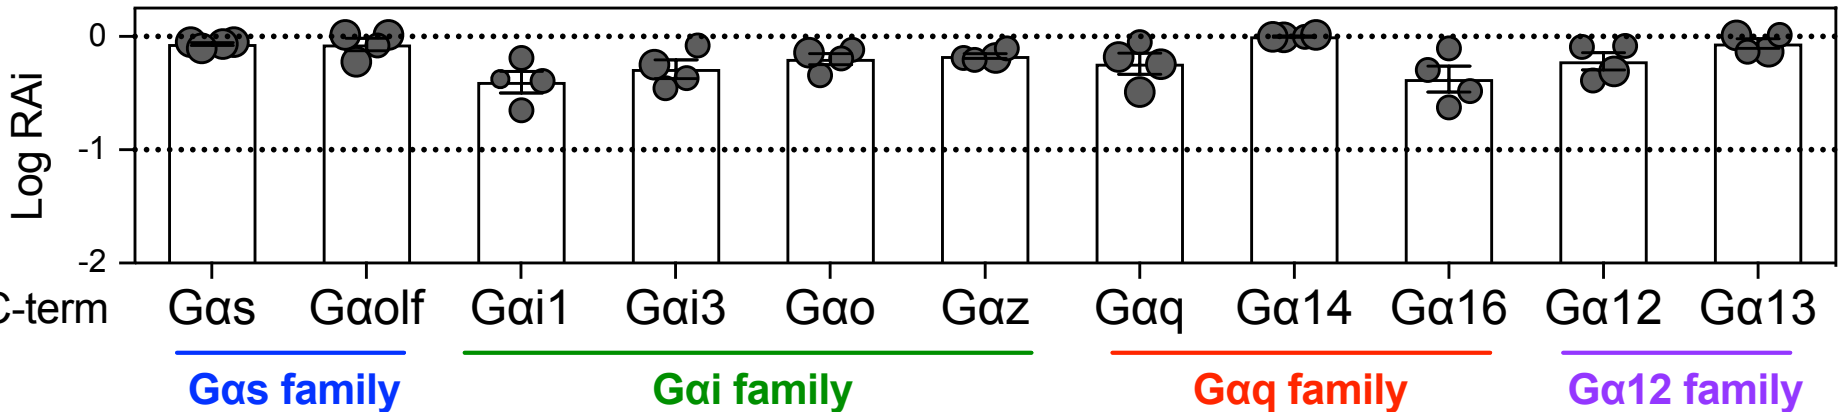

GPCR gene symbol: *KISS1R*

GPCR name: KISS1

Tested ligand: Kisspeptide-10

### C-terminal chimera co-expression

#### Gas family

#### Gai family

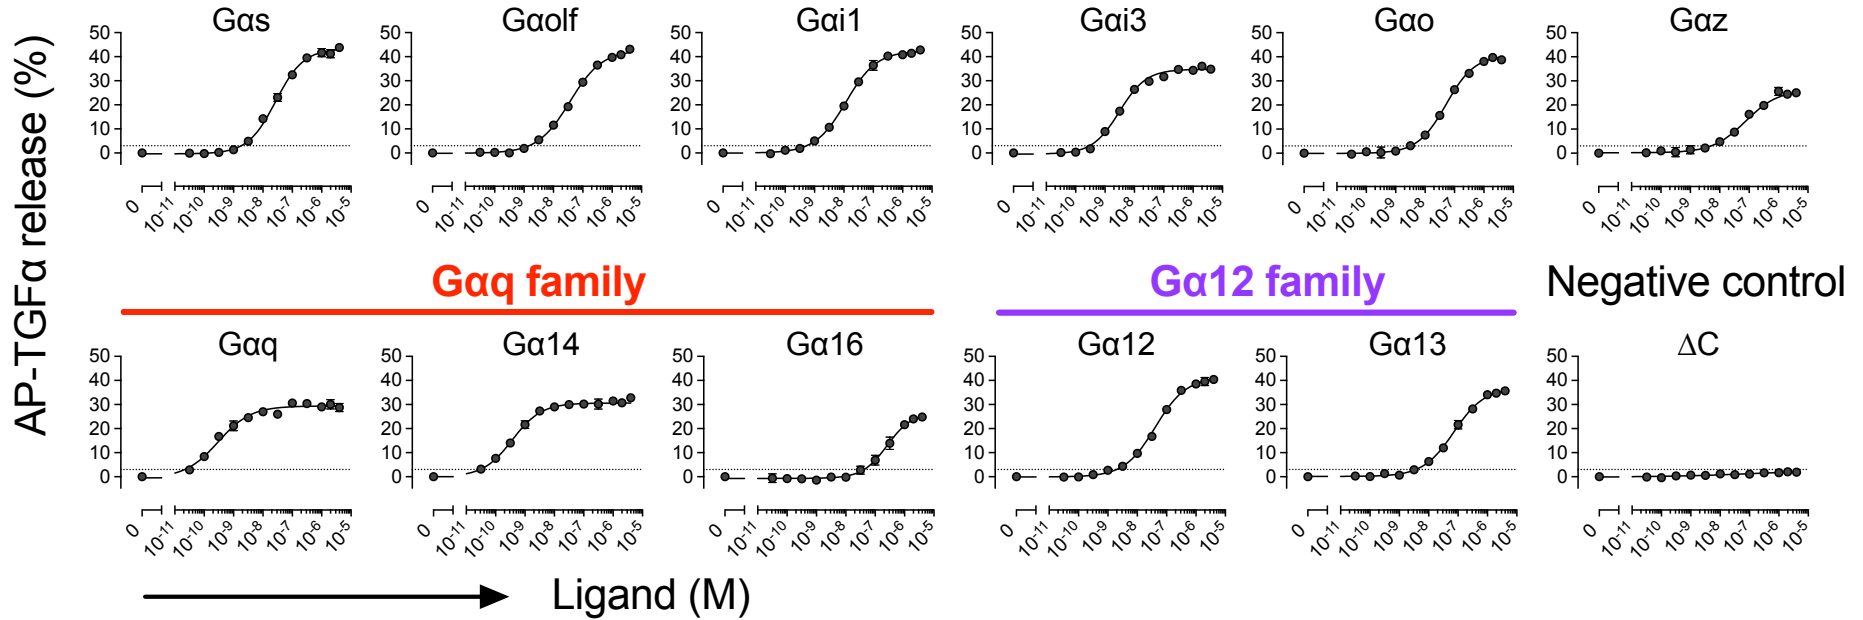

$E_{max}$  (%AP-TGFα release)    ● <3%    ● 3-5%    ● 5-10%    ● >10%

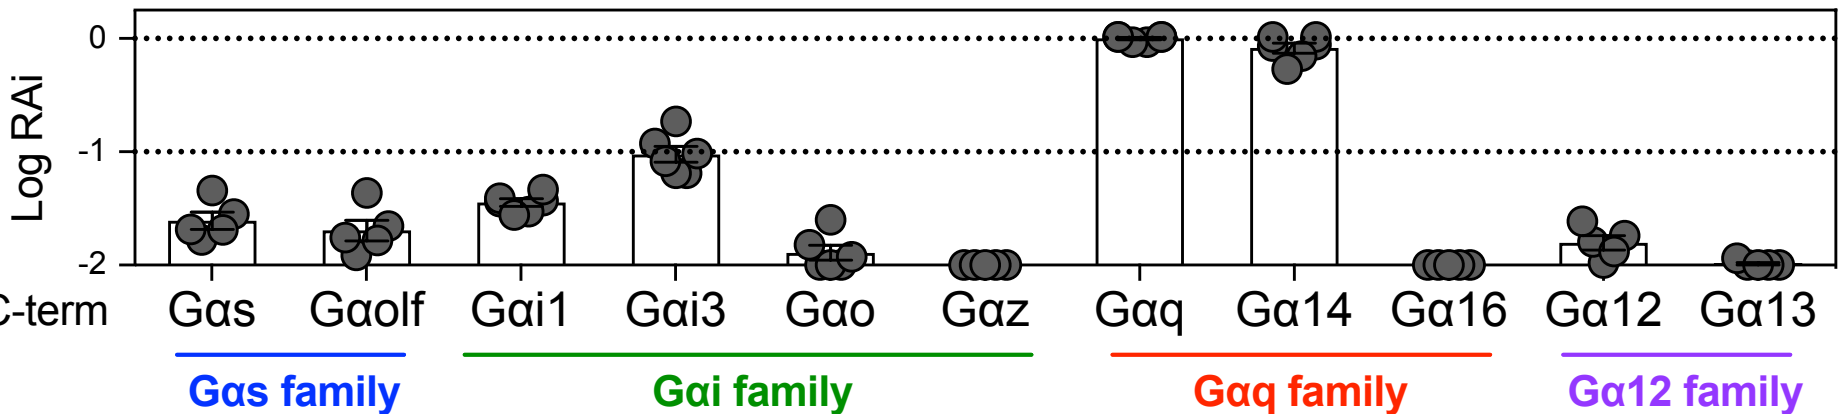

GPCR gene symbol: *LPAR1*

GPCR name: LPA1

Tested ligand: Lysophosphatidic acid

### C-terminal chimera co-expression

#### Gas family

#### Gai family

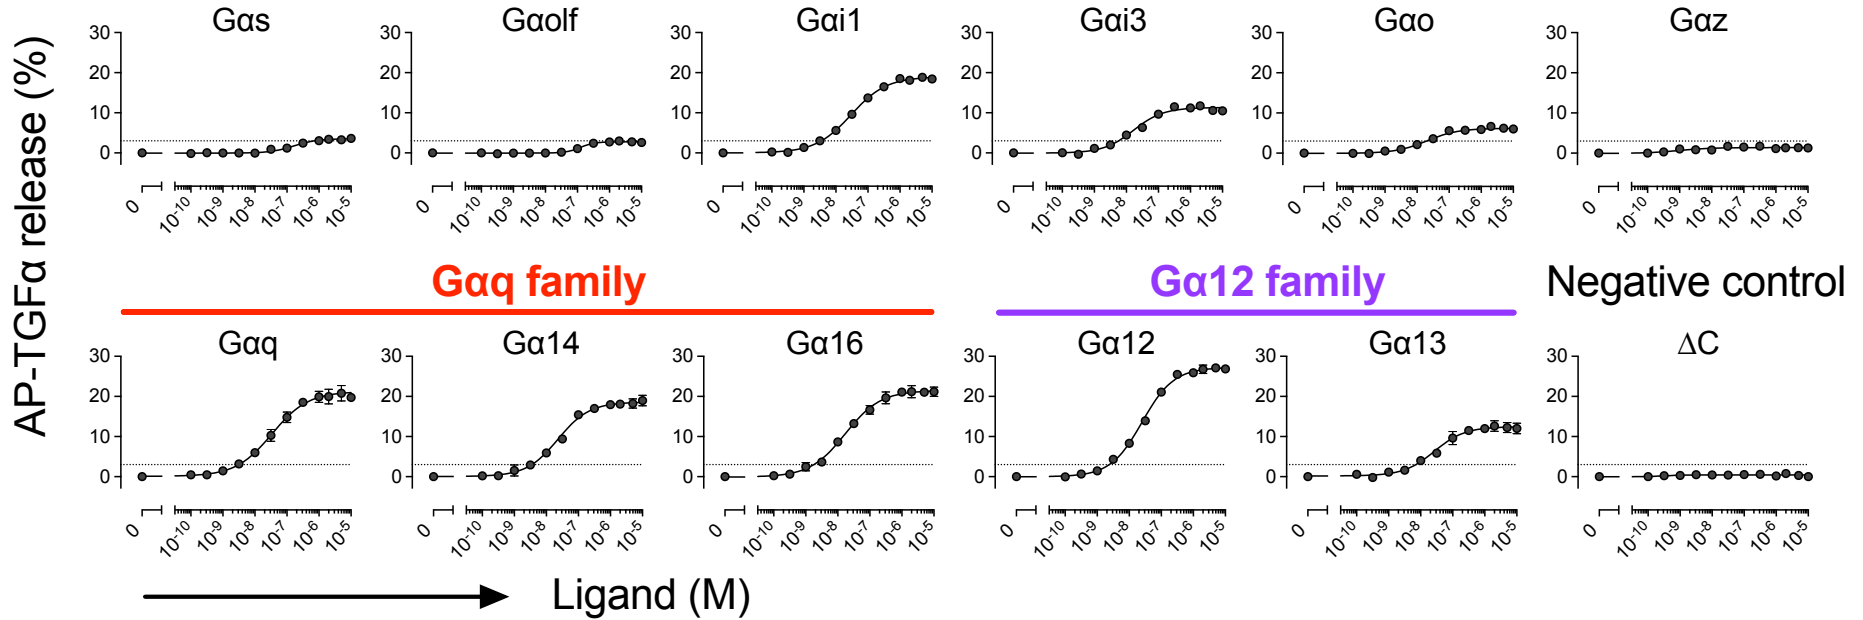

$E_{max}$  (%AP-TGFα release)

● <3%   ● 3-5%   ● 5-10%   ● >10%

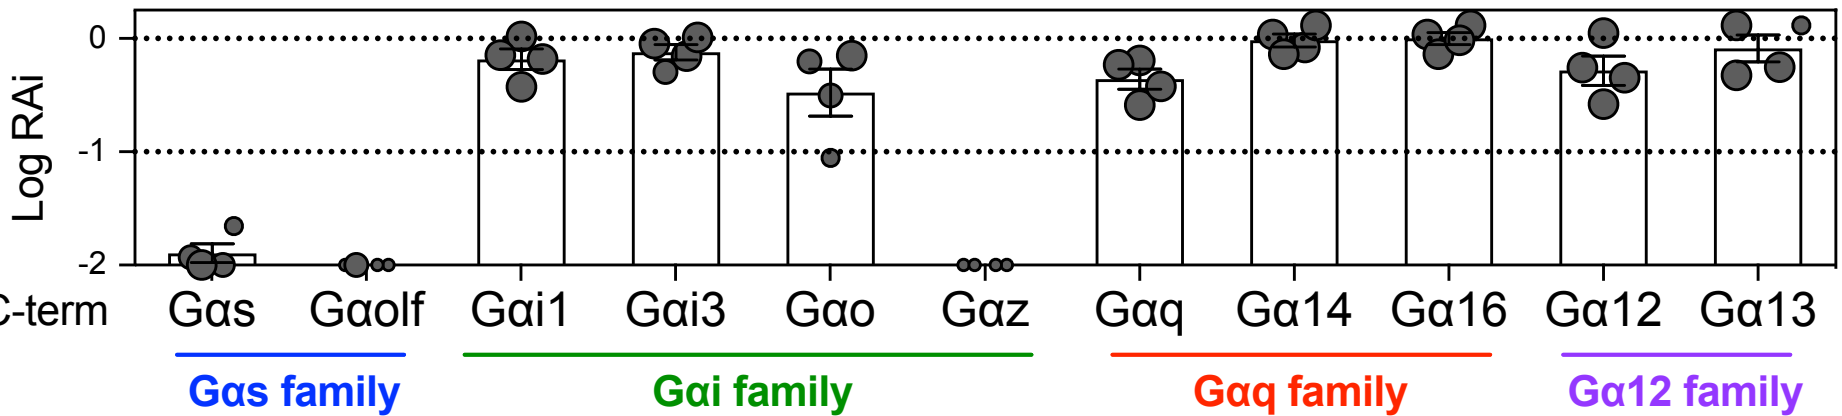

GPCR gene symbol: *LPAR2*

GPCR name: LPA2

Tested ligand: Lysophosphatidic acid

### C-terminal chimera co-expression

#### Gas family

#### Gai family

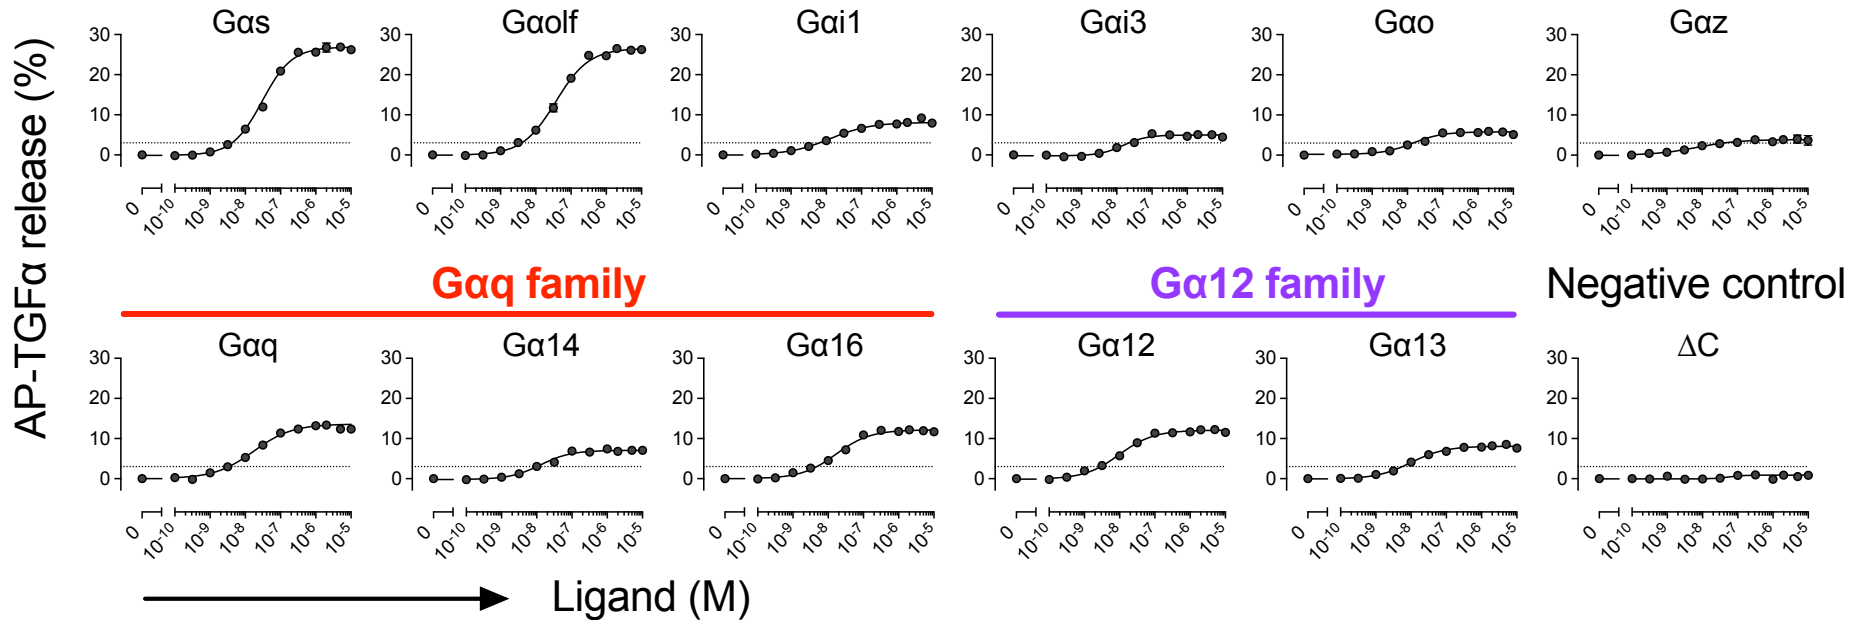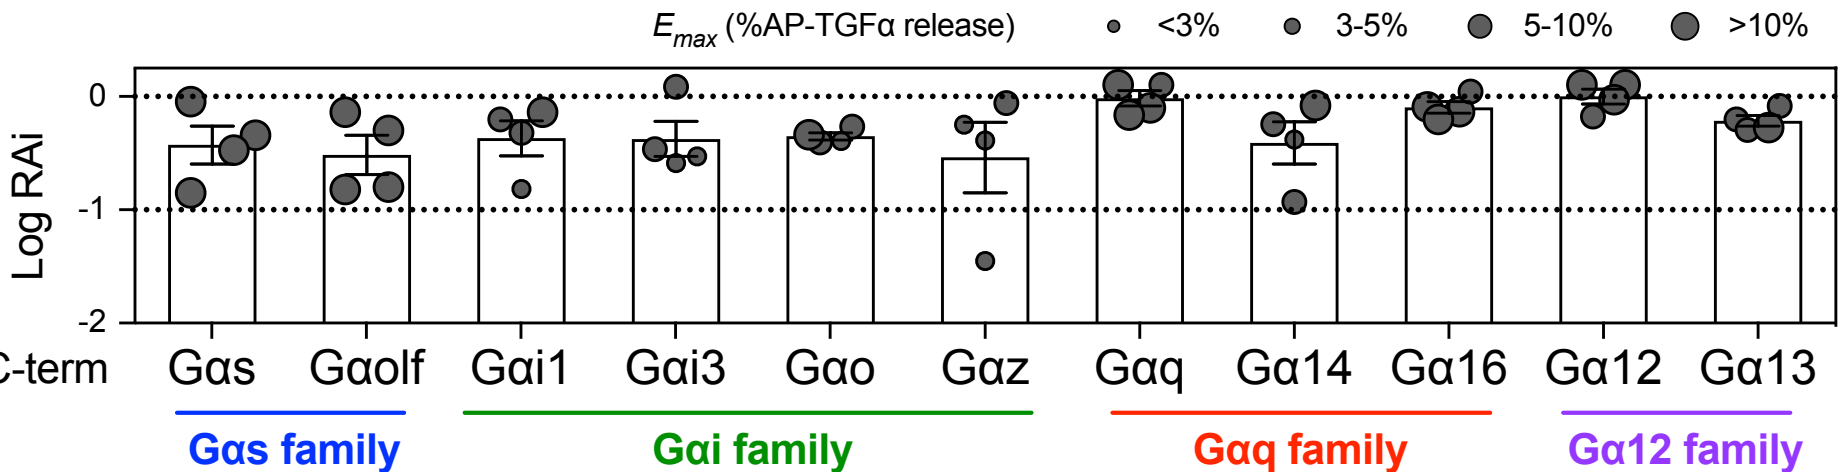

GPCR gene symbol: *LPAR3*

GPCR name: LPA3

Tested ligand: Lysophosphatidic acid

### C-terminal chimera co-expression

#### Gas family

#### Gai family

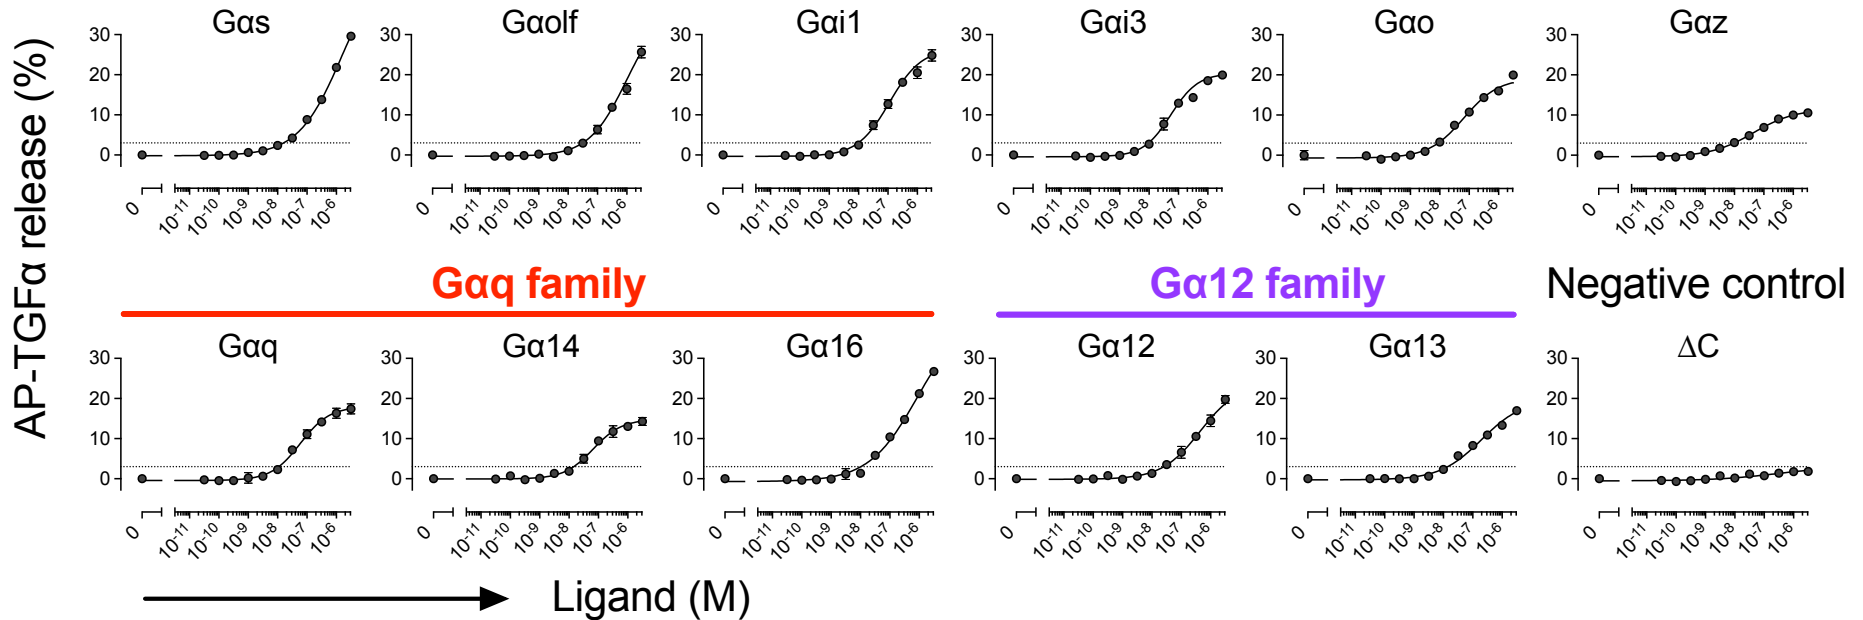

$E_{max}$  (%AP-TGFα release)

● <3%   ● 3-5%   ● 5-10%   ● >10%

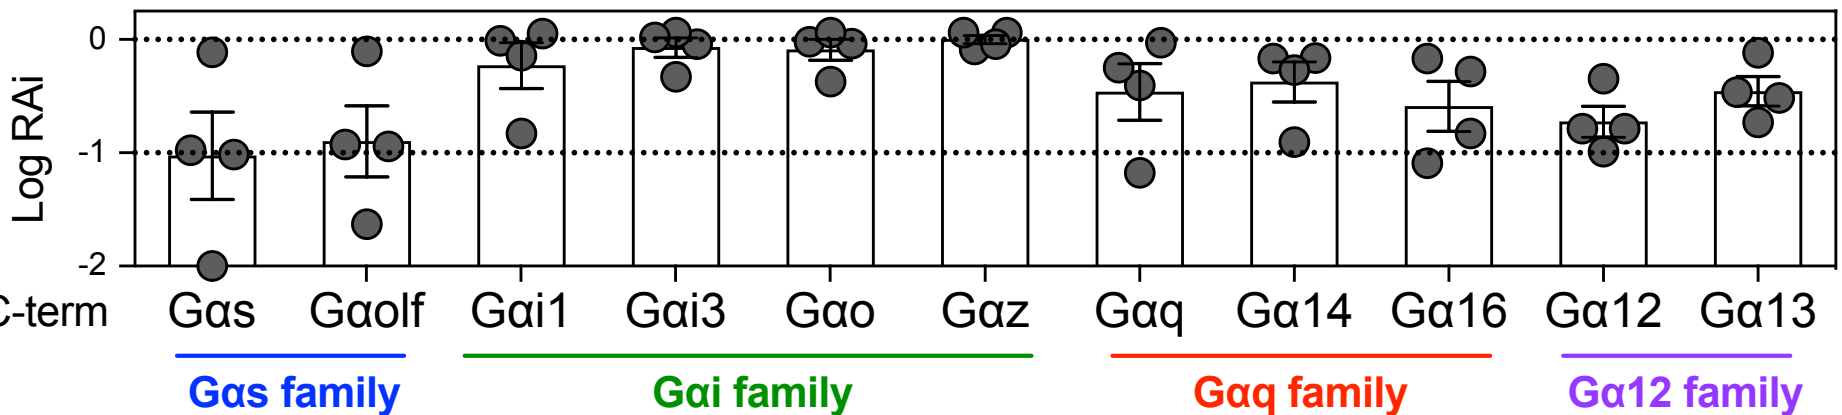

GPCR gene symbol: *LPAR4*

GPCR name: LPA4

Tested ligand: Lysophosphatidic acid (+10  $\mu$ M Ki16425)

### C-terminal chimera co-expression

#### Gas family

#### Gai family

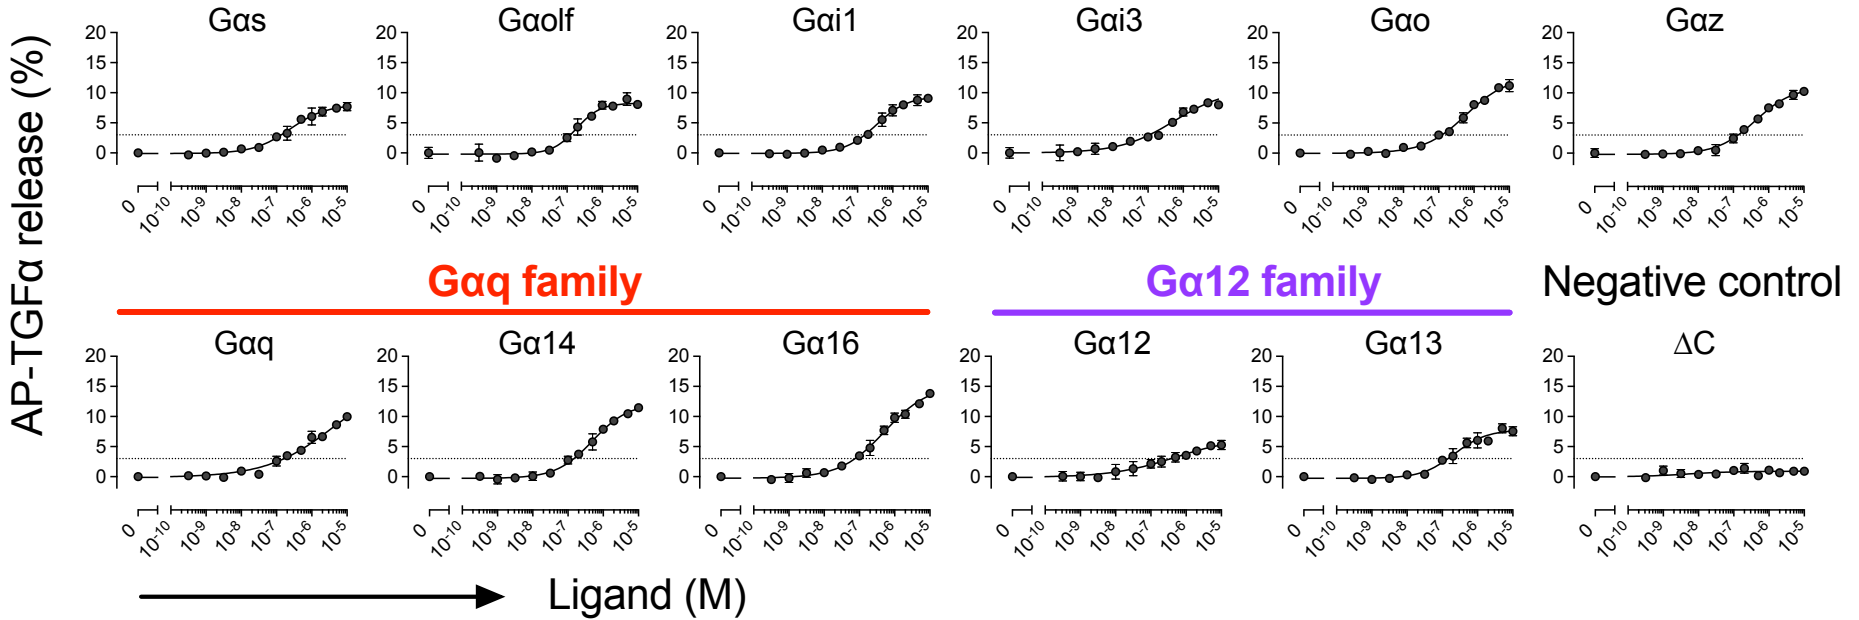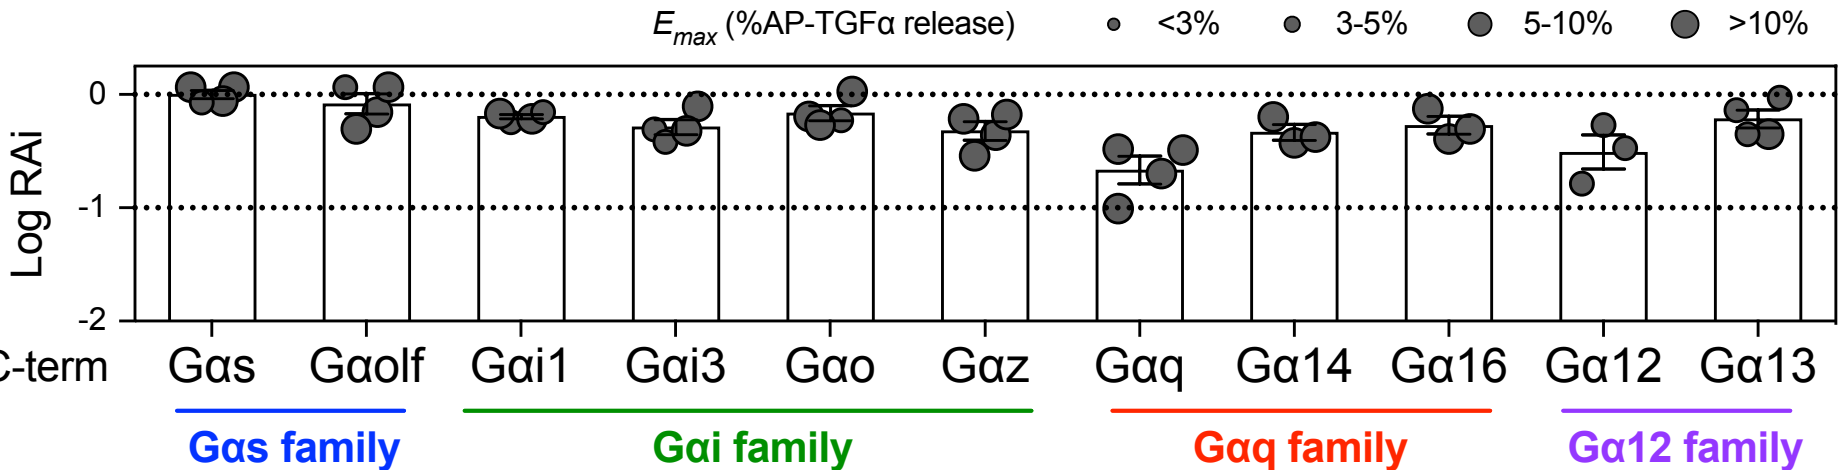

GPCR gene symbol: *LPAR5*

GPCR name: LPA5

Tested ligand: Lysophosphatidic acid (+10  $\mu$ M Ki16425)

### C-terminal chimera co-expression

#### Gas family

#### Gai family

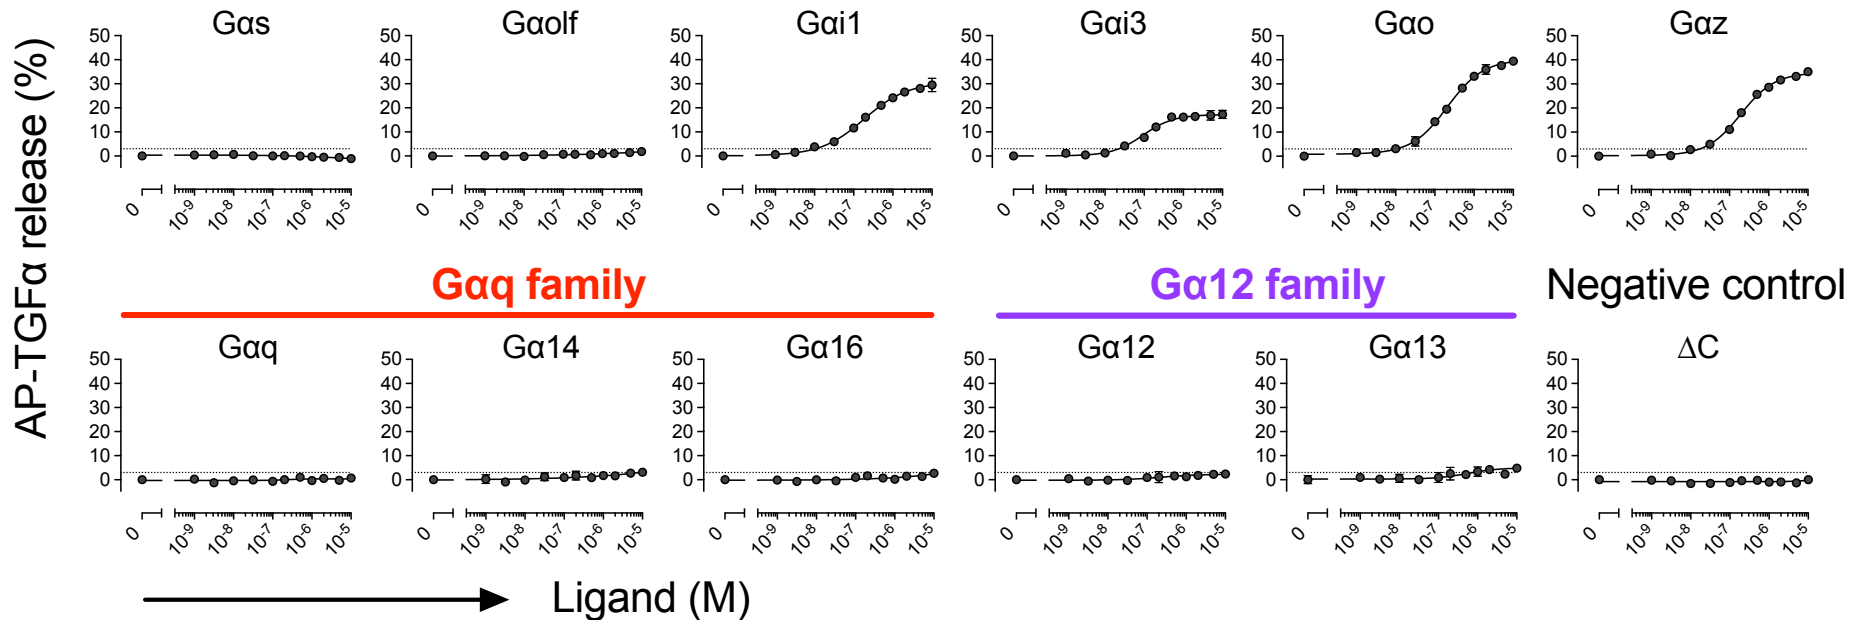

$E_{max}$  (%AP-TGF $\alpha$  release)

● <3%   ● 3-5%   ● 5-10%   ● >10%

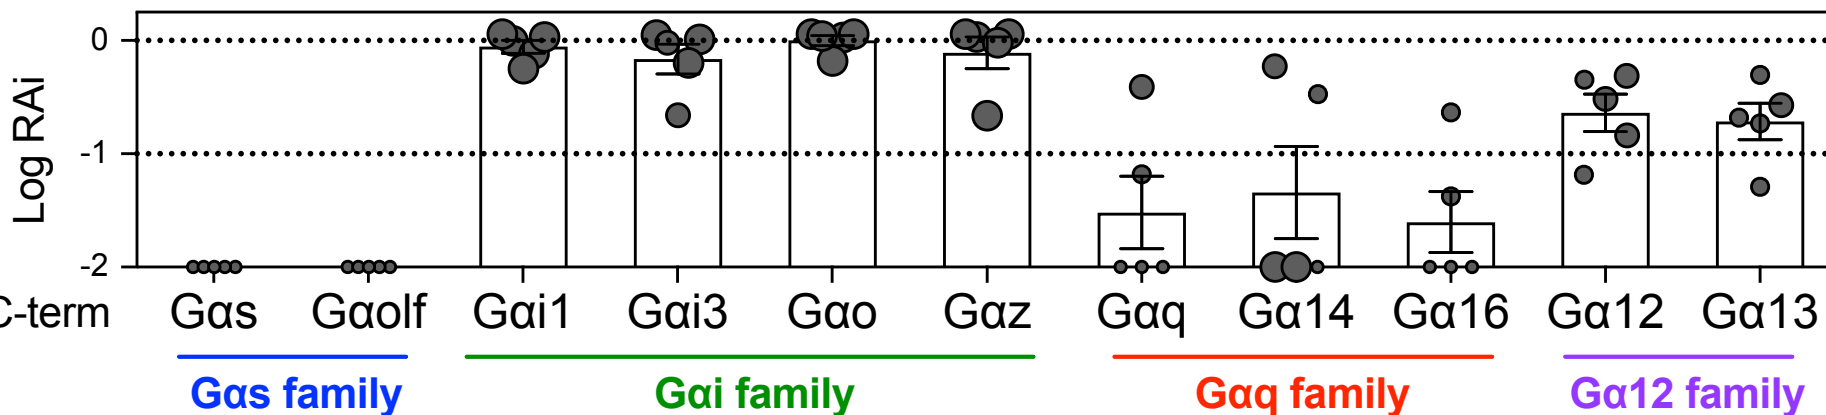



GPCR gene symbol: *LPAR6*

GPCR name: LPA6

Tested ligand: Lysophosphatidic acid (+10  $\mu$ M Ki16425)

### C-terminal chimera co-expression

#### Gas family

#### Gai family

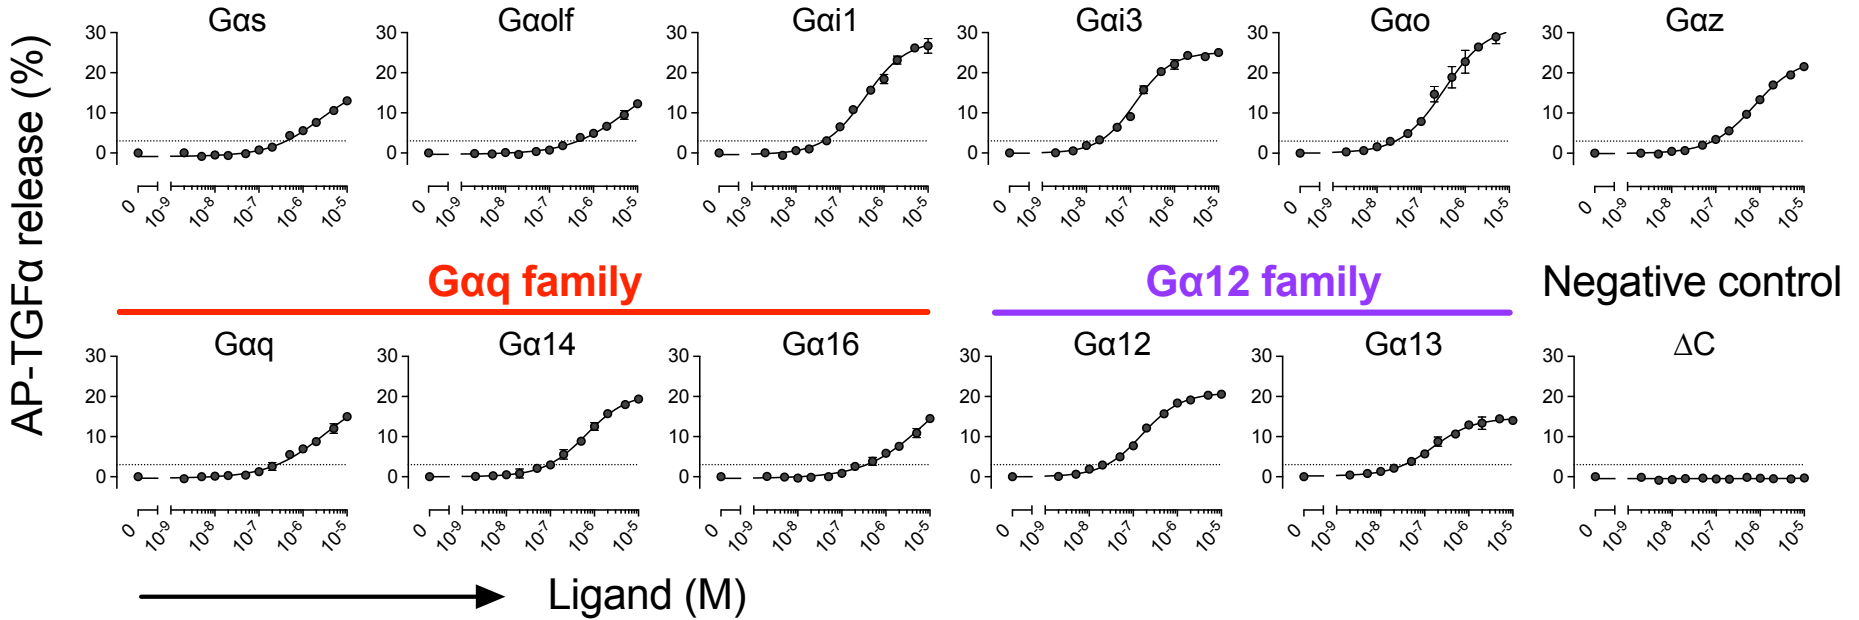

$E_{max}$  (%AP-TGF $\alpha$  release)

● <3%   ● 3-5%   ● 5-10%   ● >10%

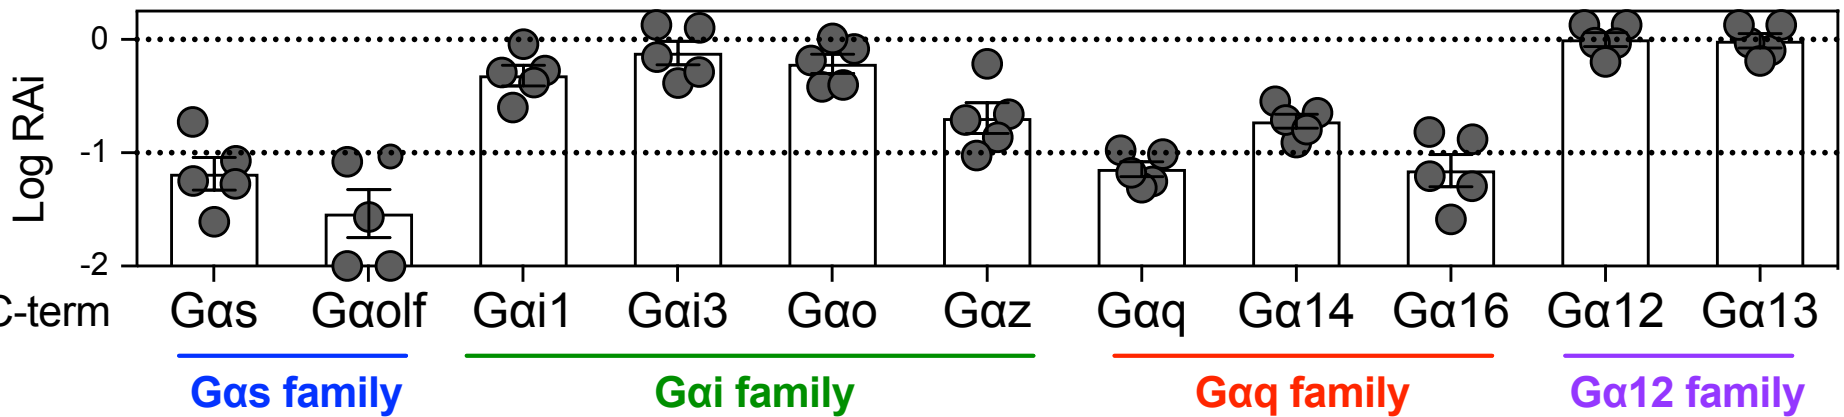

GPCR gene symbol: *LTB4R*

GPCR name: BLT1

Tested ligand: Leukotriene B4

### C-terminal chimera co-expression

#### Gas family

#### Gai family

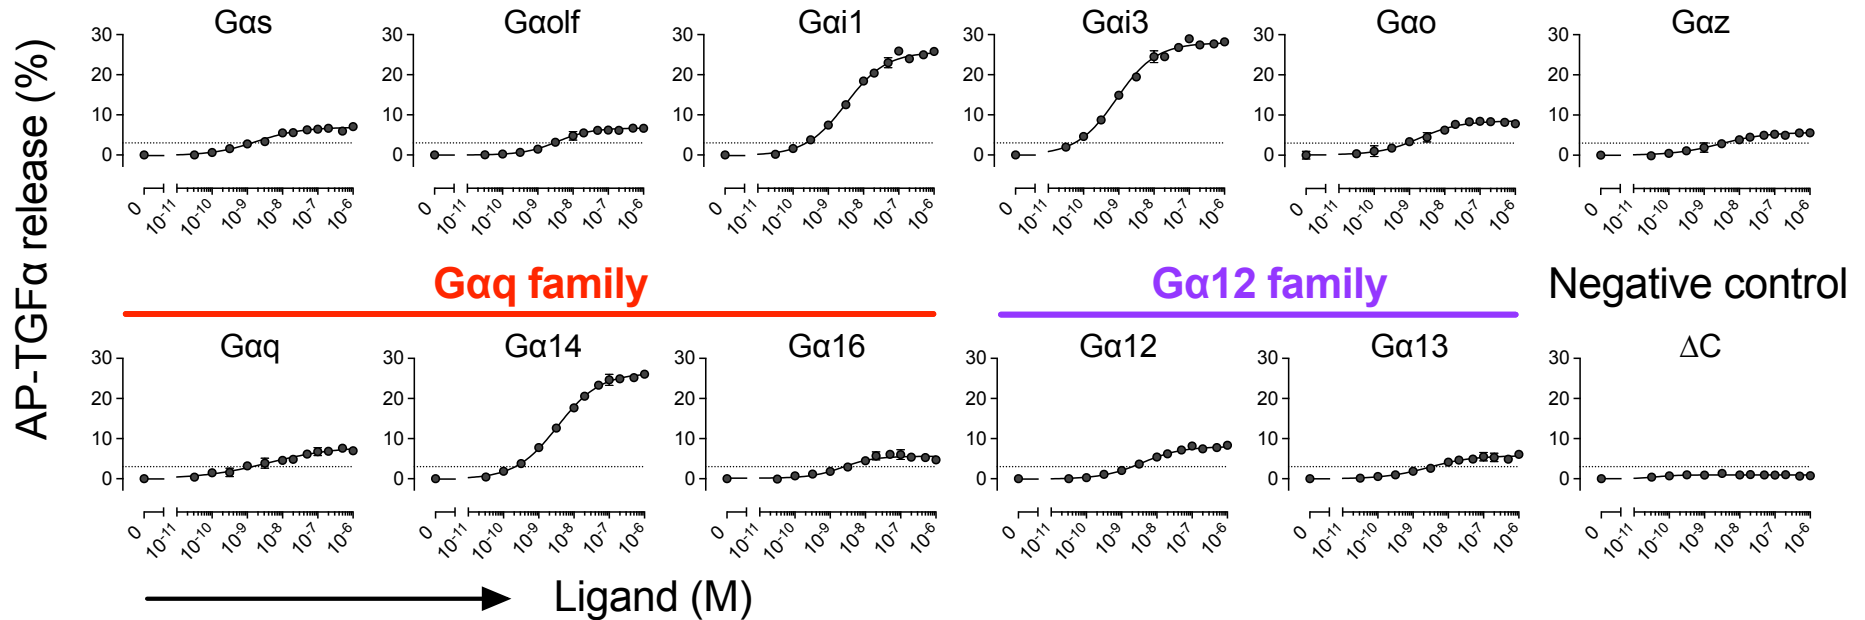

$E_{max}$  (%AP-TGFα release)

● <3%   ● 3-5%   ● 5-10%   ● >10%

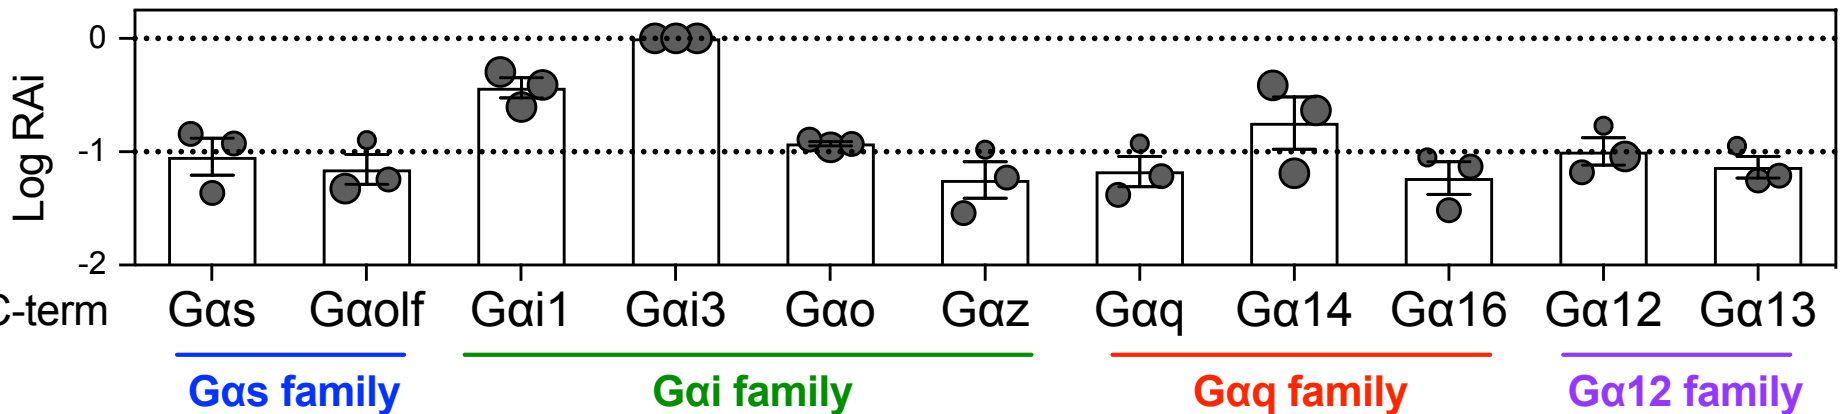

GPCR gene symbol: *LTB4R2*

GPCR name: BLT2

Tested ligand: CAY10583

### C-terminal chimera co-expression

#### Gas family

#### Gai family

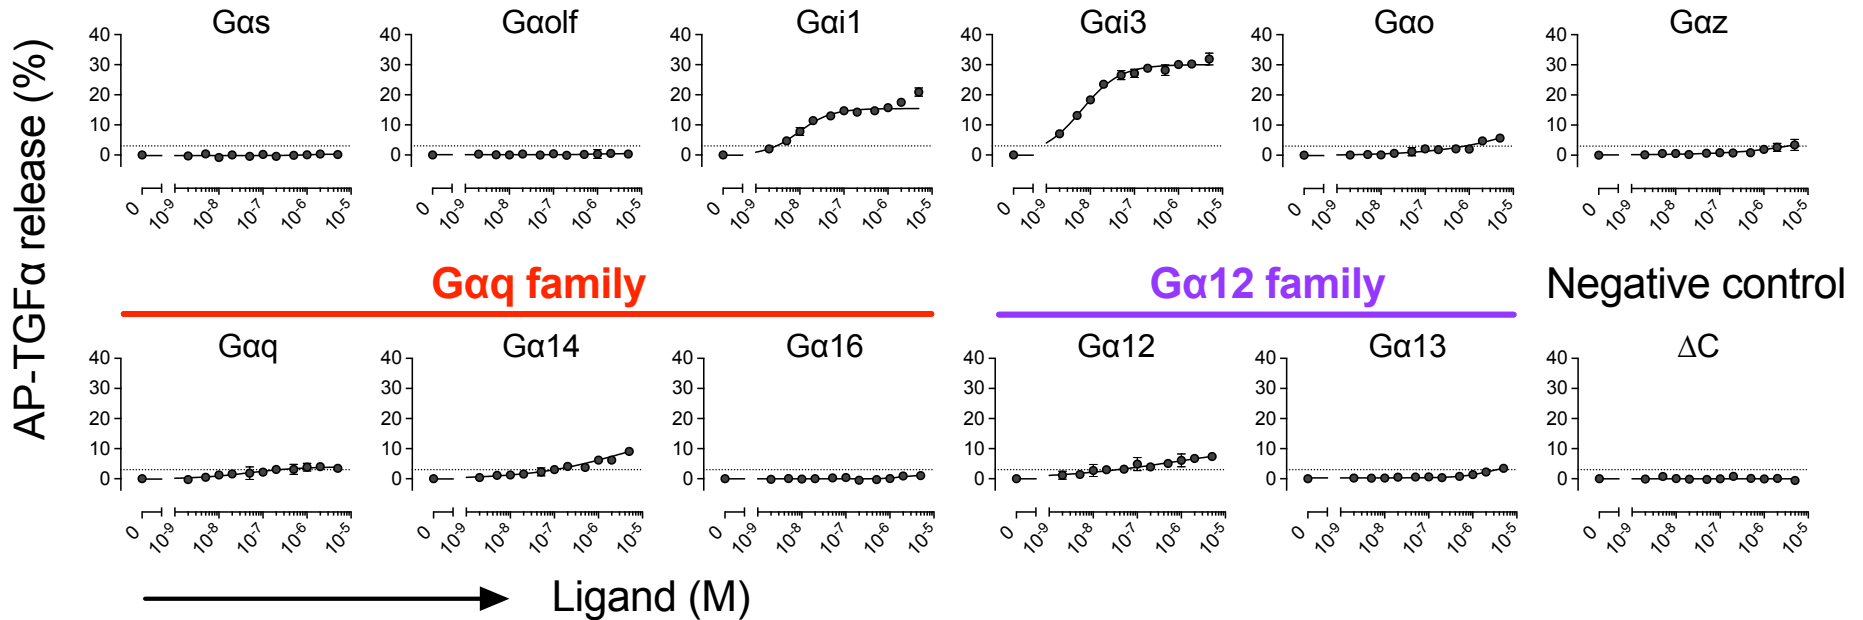

$E_{max}$  (%AP-TGFα release)    ● <3%    ● 3-5%    ● 5-10%    ● >10%

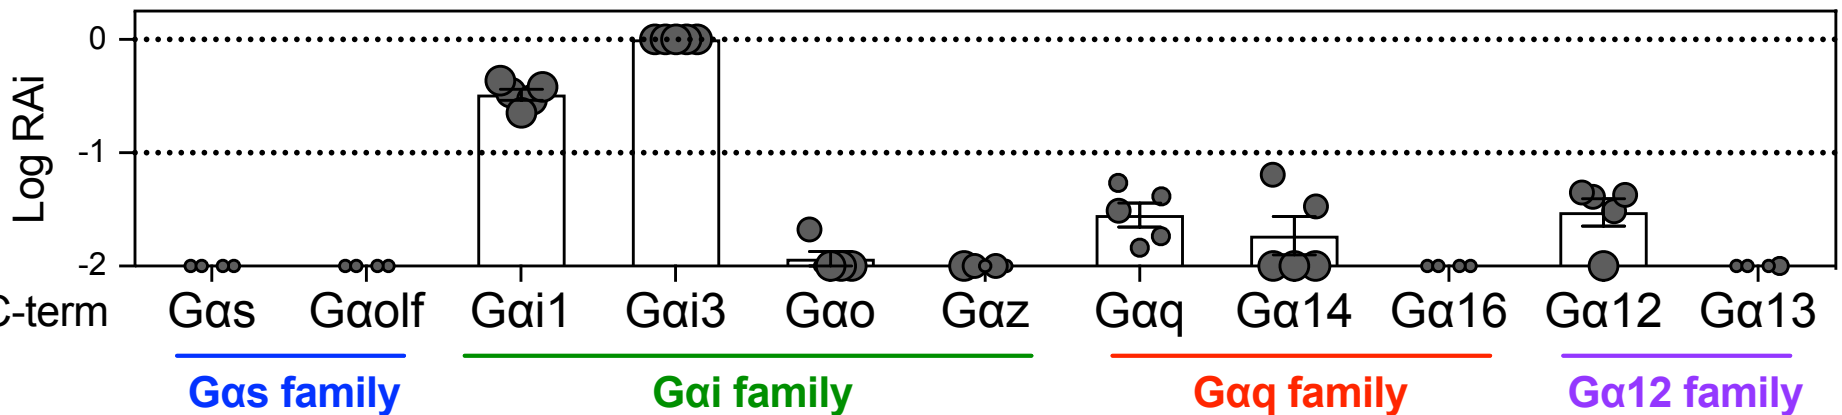

GPCR gene symbol: *MC1R*

GPCR name: MC1

Tested ligand:  $\alpha$ -melanocyte-stimulating hormone ( $\alpha$ -MSH)

### C-terminal chimera co-expression

#### Gas family

#### Gai family

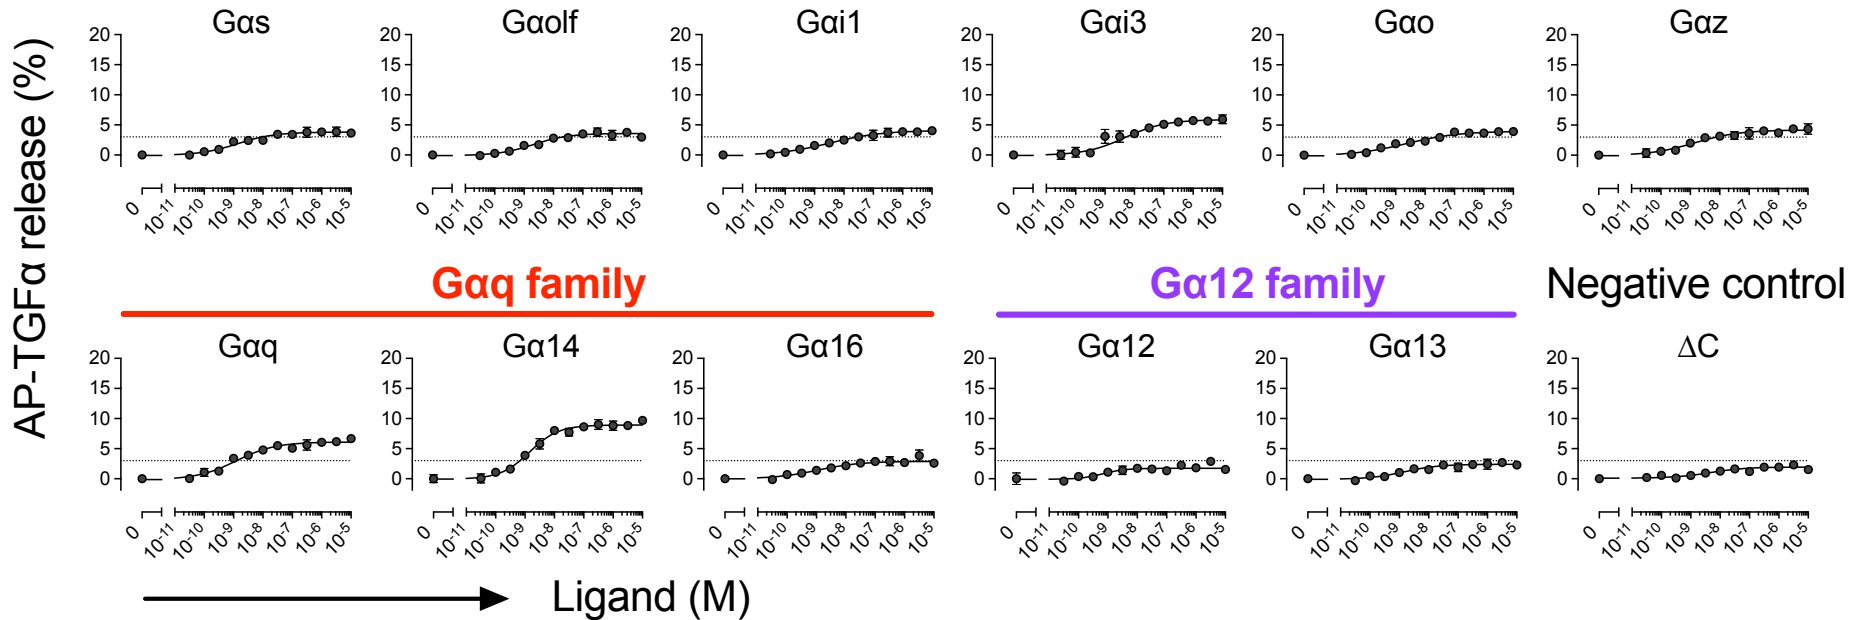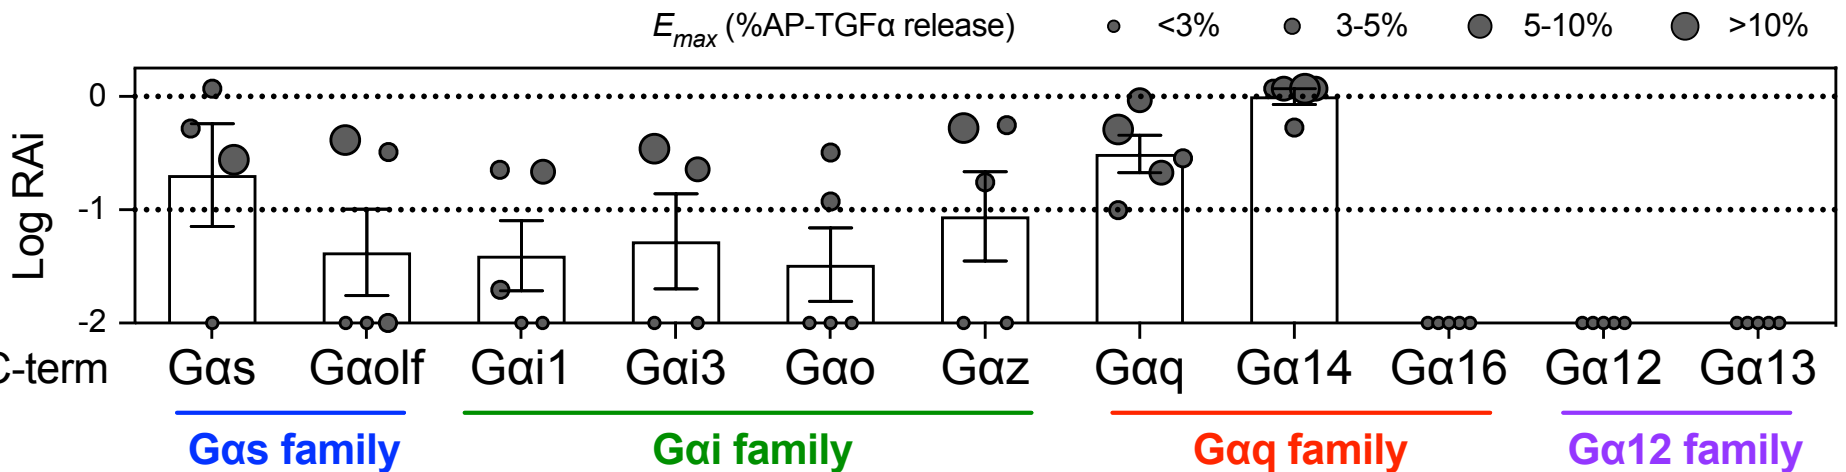

GPCR gene symbol: *MC3R*

GPCR name: MC3

Tested ligand:  $\alpha$ -melanocyte-stimulating hormone ( $\alpha$ -MSH)

### C-terminal chimera co-expression

#### Gas family

#### Gai family

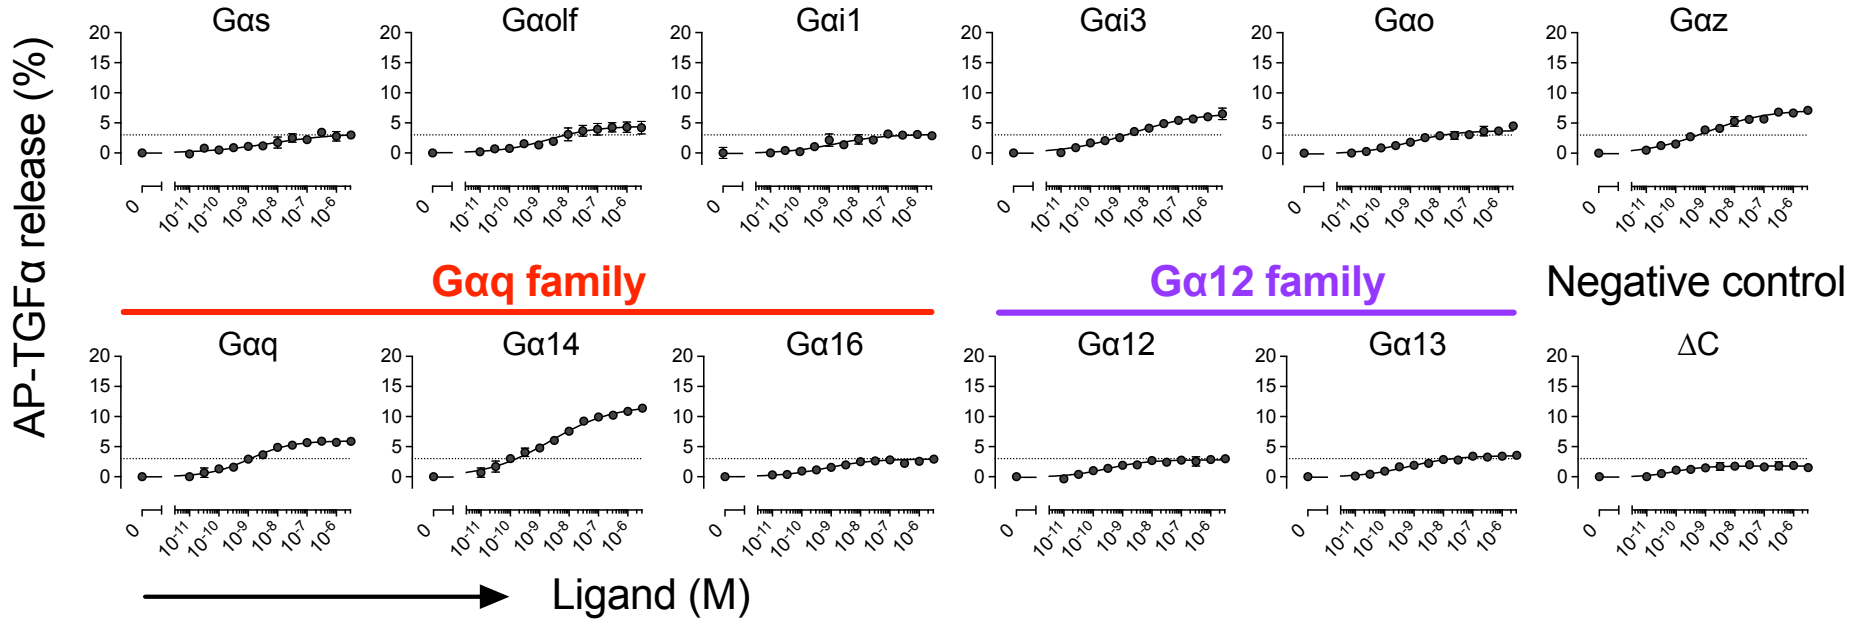

$E_{max}$  (%AP-TGF $\alpha$  release)

● <3%   ● 3-5%   ● 5-10%   ● >10%

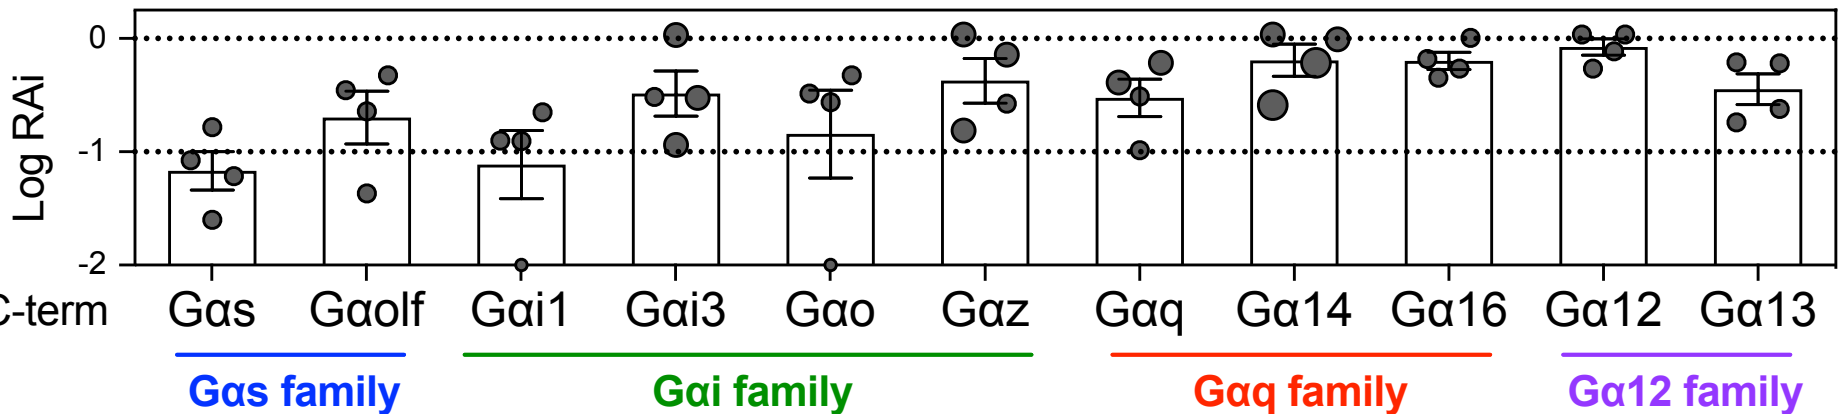

GPCR gene symbol: *MC4R*

GPCR name: MC4

Tested ligand:  $\alpha$ -melanocyte-stimulating hormone ( $\alpha$ -MSH)

### C-terminal chimera co-expression

#### Gas family

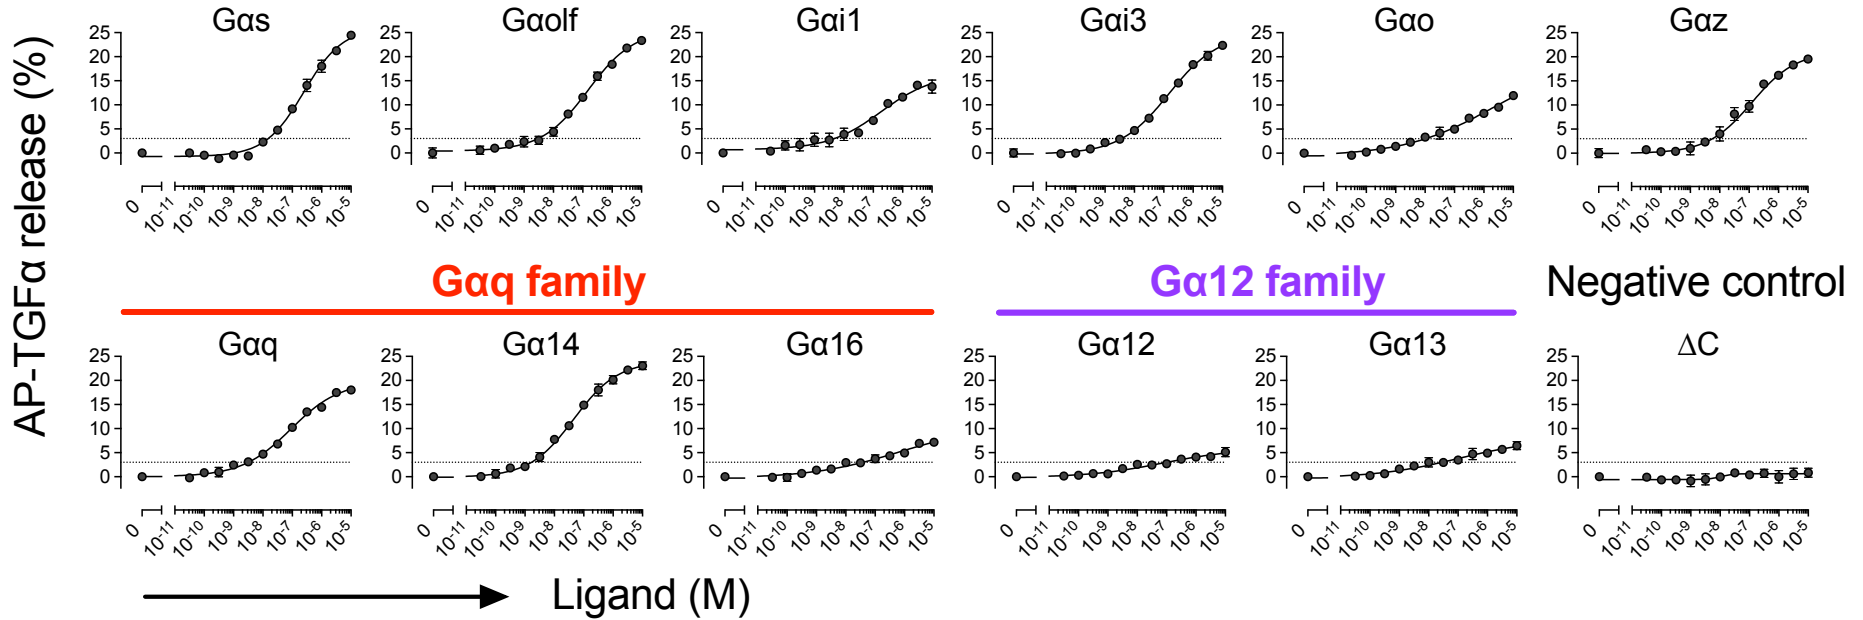

$E_{max}$  (%AP-TGF $\alpha$  release)

● <3%   ● 3-5%   ● 5-10%   ● >10%

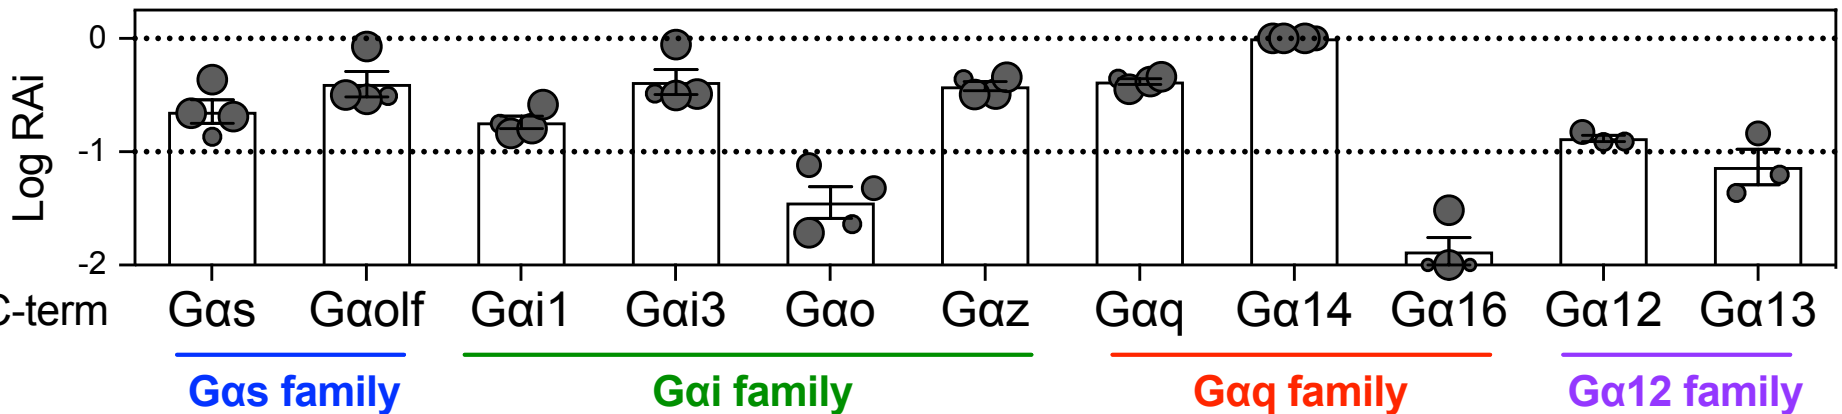

GPCR gene symbol: *MC5R*

GPCR name: MC5

Tested ligand:  $\alpha$ -melanocyte-stimulating hormone ( $\alpha$ -MSH)

### C-terminal chimera co-expression

#### Gas family

#### Gai family

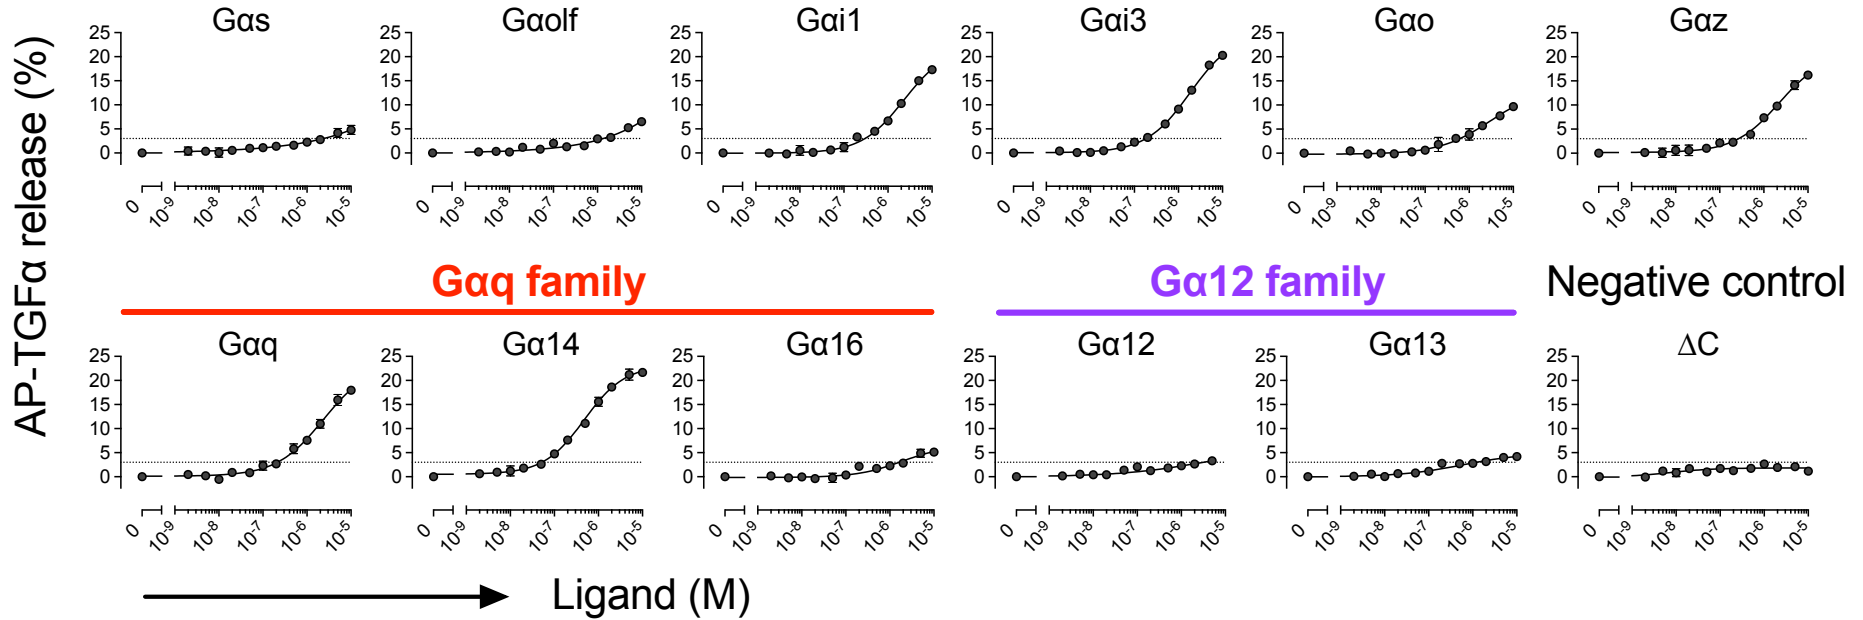

$E_{max}$  (%AP-TGF $\alpha$  release)    ● <3%    ● 3-5%    ● 5-10%    ● >10%

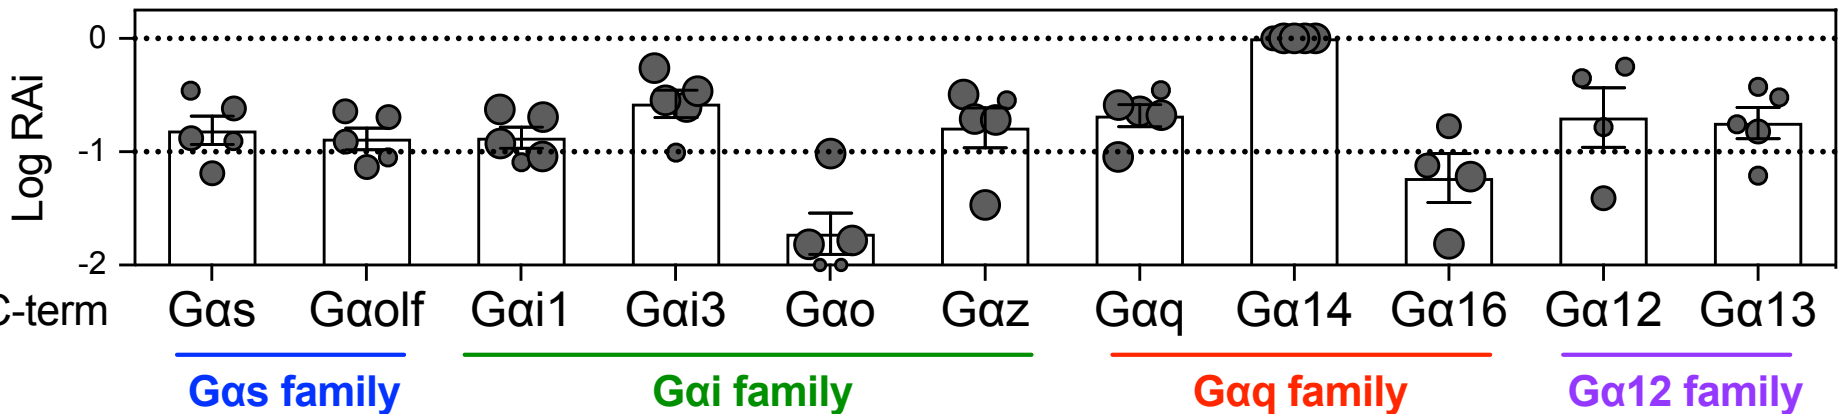

GPCR gene symbol: *MCHR1*

GPCR name: MCH1

Tested ligand: Melanin-concentrating hormone (MCH)

### C-terminal chimera co-expression

#### Gas family

#### Gai family

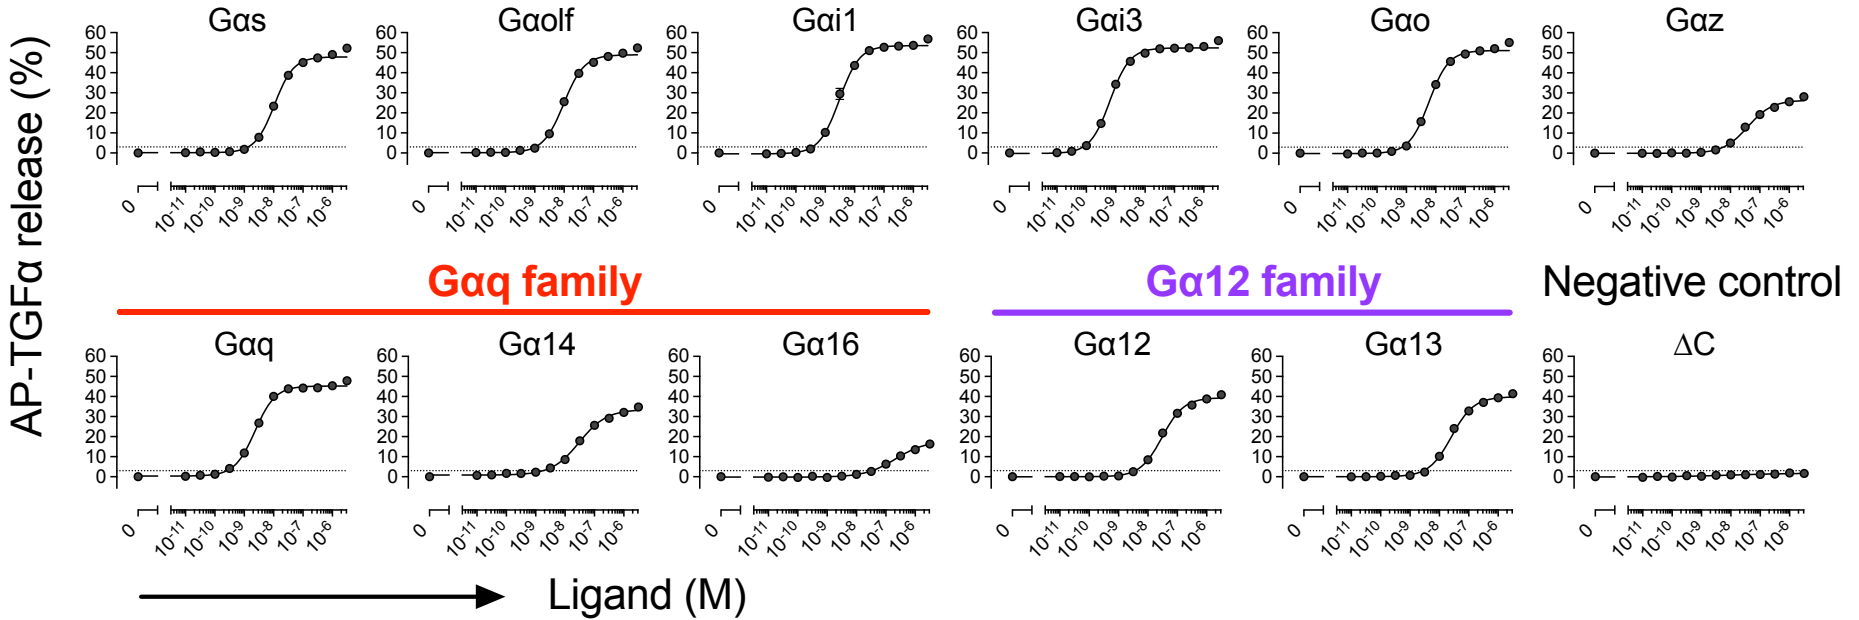

$E_{max}$  (%AP-TGFα release)

● <3%   ● 3-5%   ● 5-10%   ● >10%

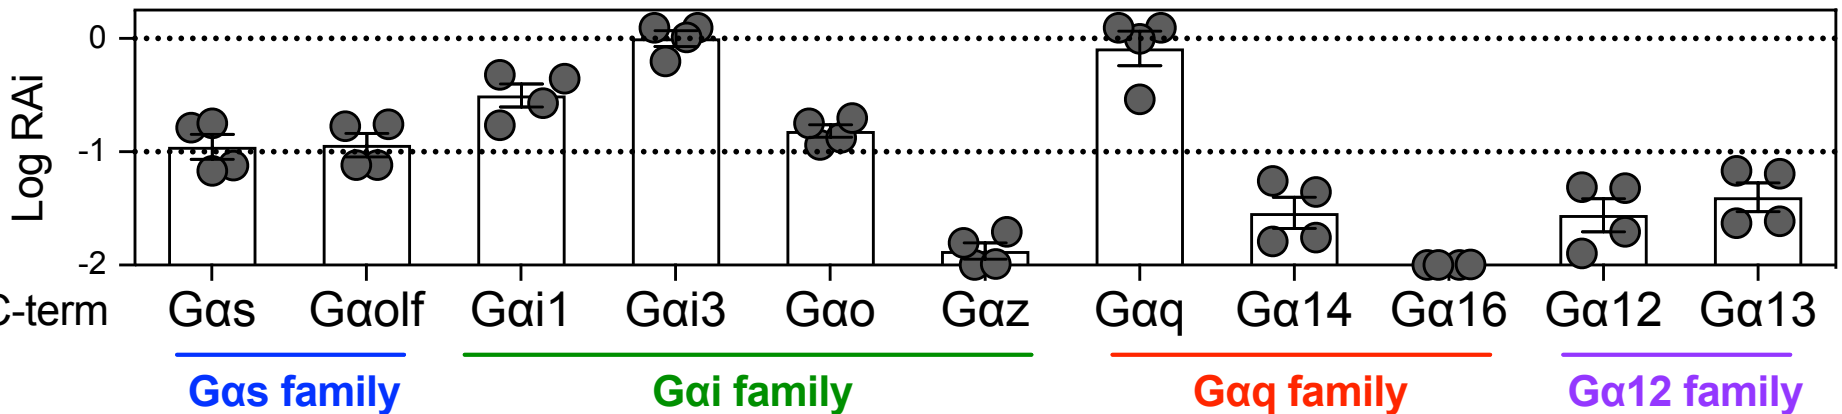



GPCR gene symbol: *MCHR2*

GPCR name: MCH2

Tested ligand: Melanin-concentrating hormone (MCH)

### C-terminal chimera co-expression

#### Gas family

#### Gai family

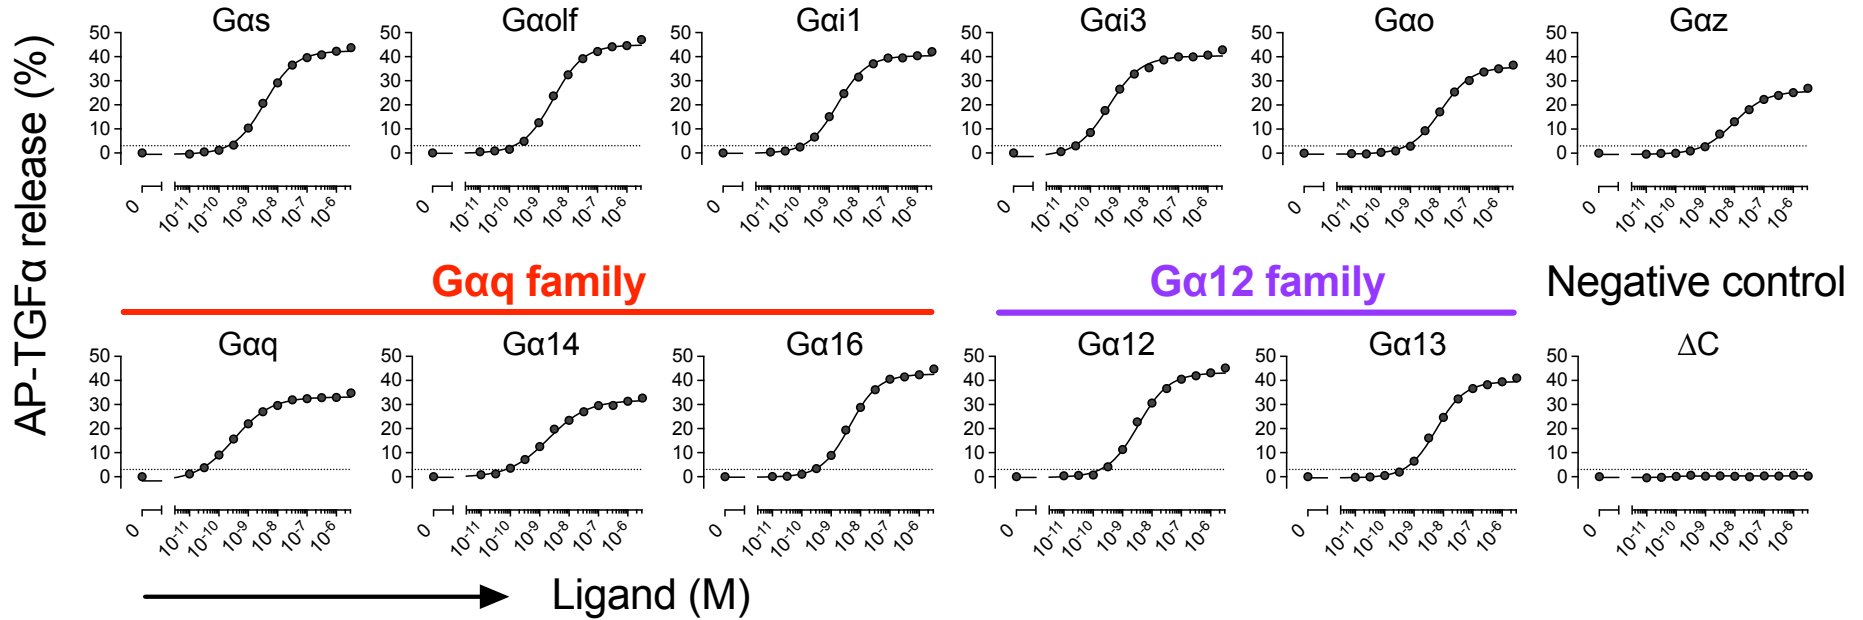

$E_{max}$  (%AP-TGFα release)

● <3%   ● 3-5%   ● 5-10%   ● >10%

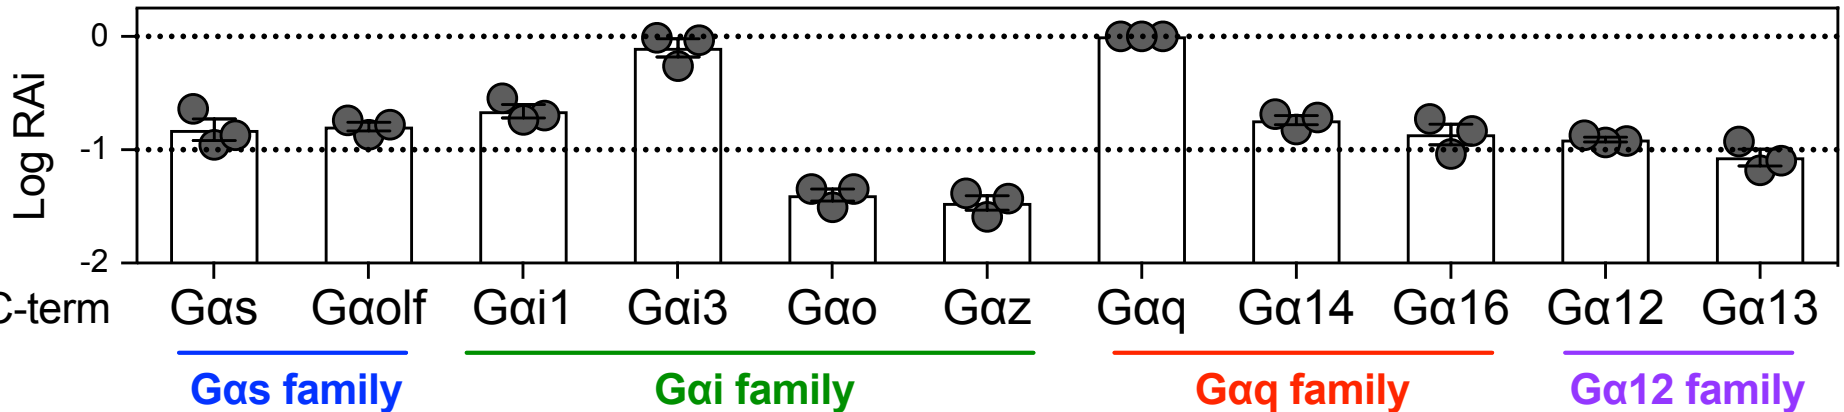

GPCR gene symbol: *MLNR*

GPCR name: MLNR

Tested ligand: Motilin

### C-terminal chimera co-expression

#### Gas family

#### Gai family

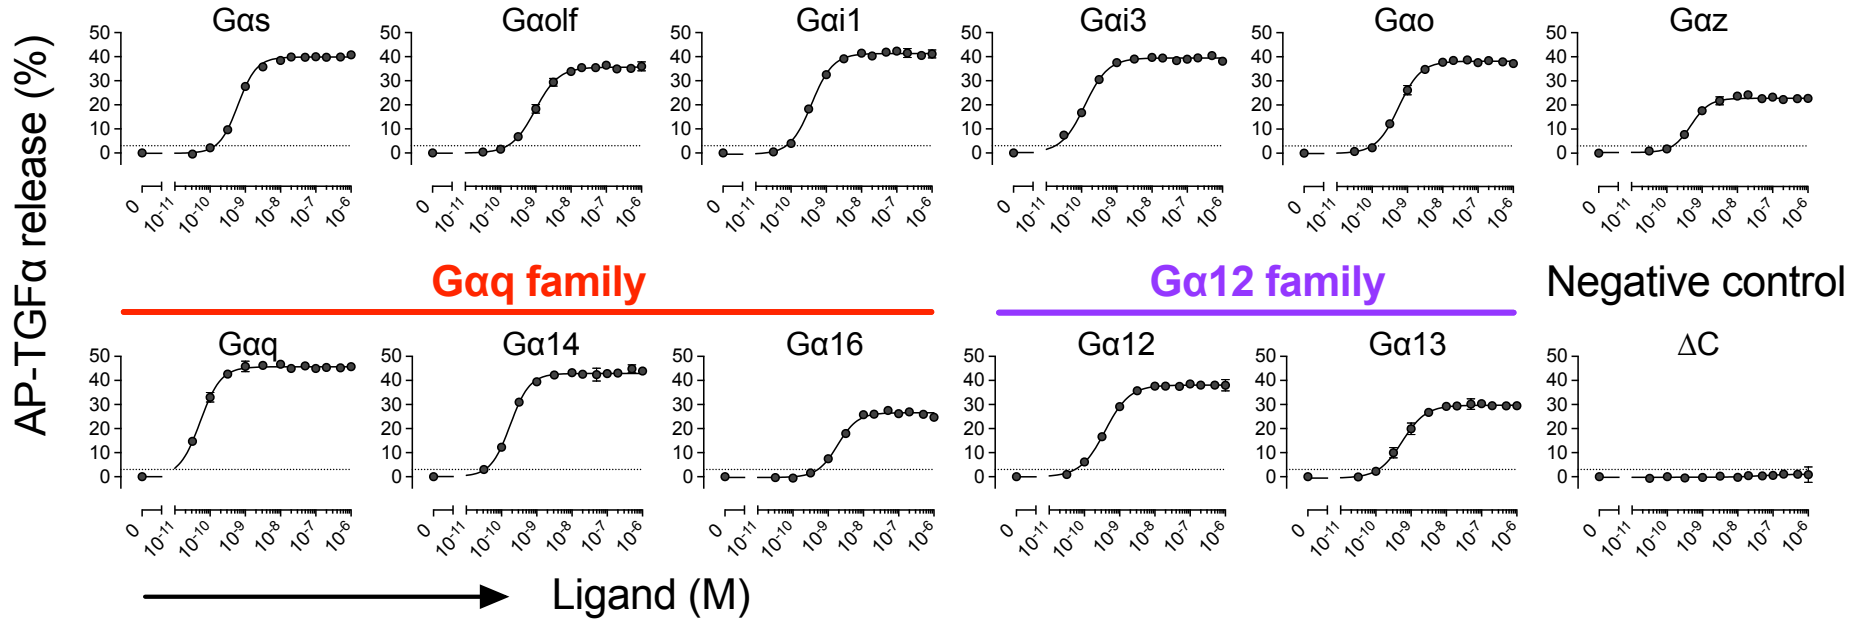

$E_{max}$  (%AP-TGF $\alpha$  release)    ● <3%    ● 3-5%    ● 5-10%    ● >10%

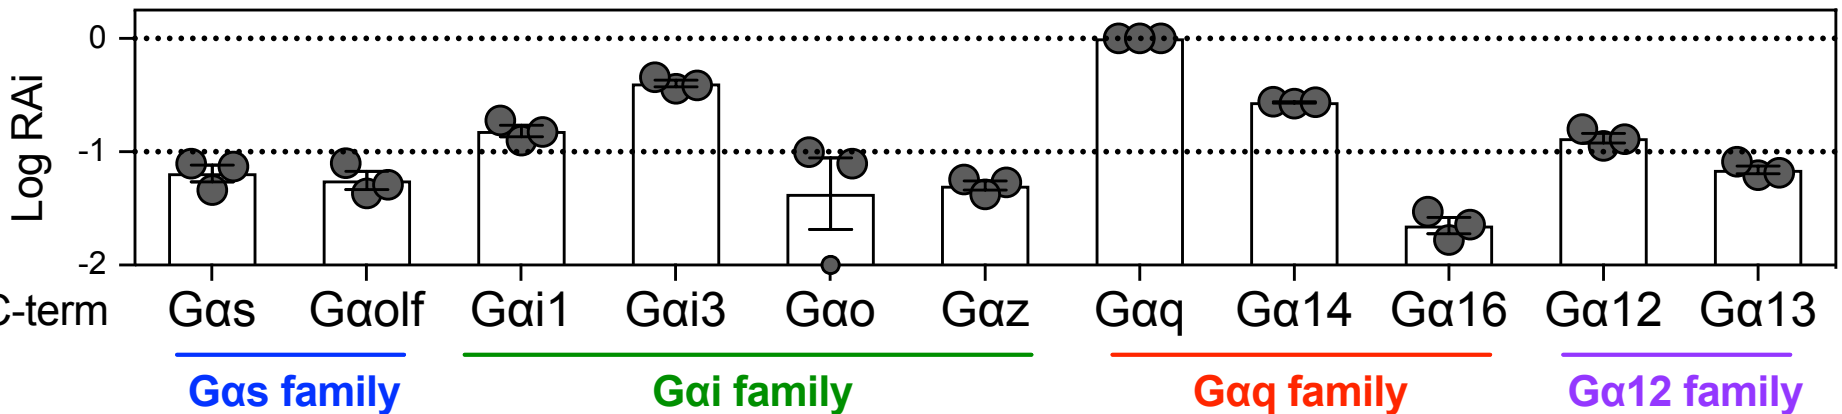

GPCR gene symbol: *MRGPRX1*

GPCR name: MRGX1

Tested ligand: BAM-22P

### C-terminal chimera co-expression

#### Gas family

#### Gai family

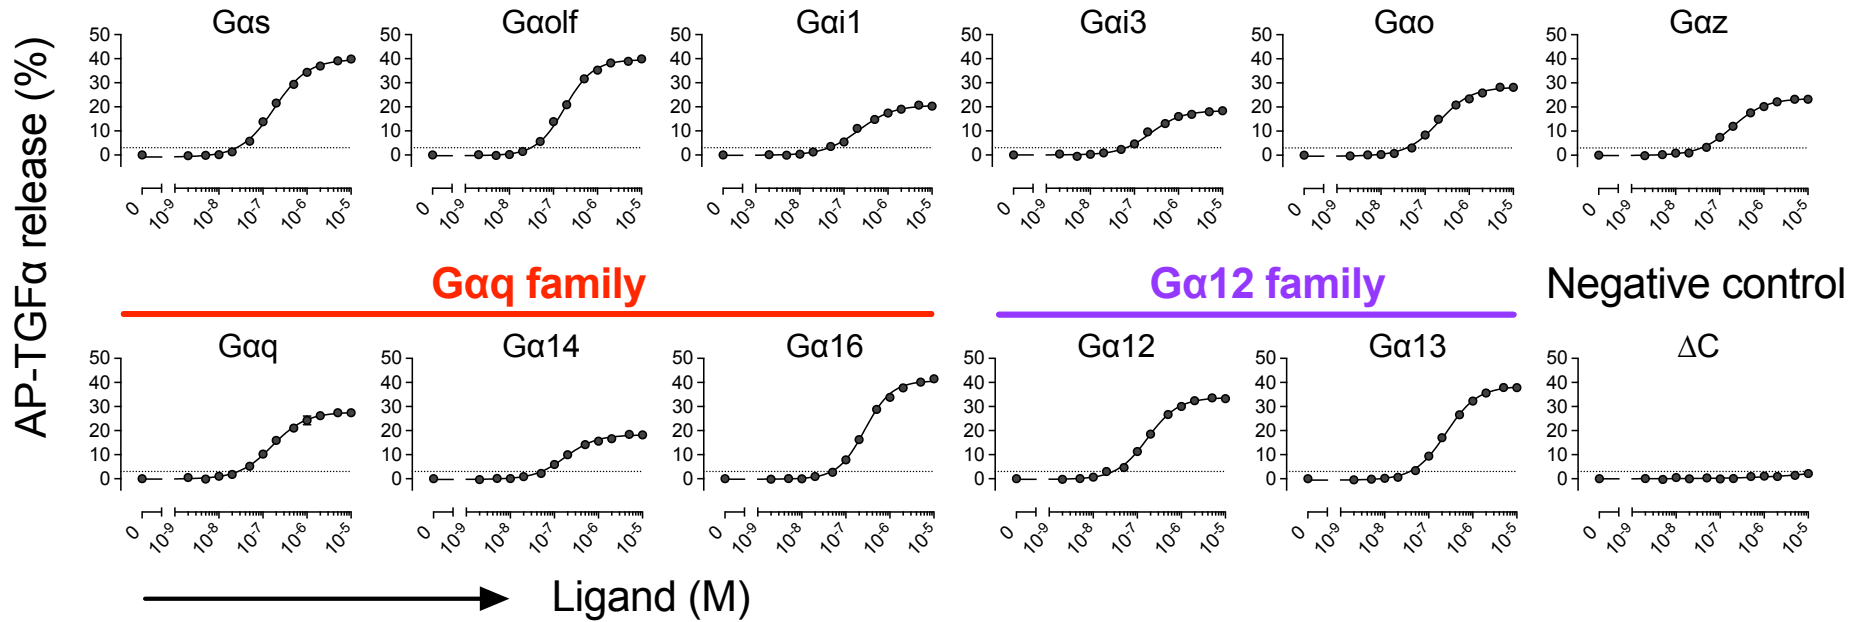

$E_{max}$  (%AP-TGFα release)    ● <3%    ● 3-5%    ● 5-10%    ● >10%

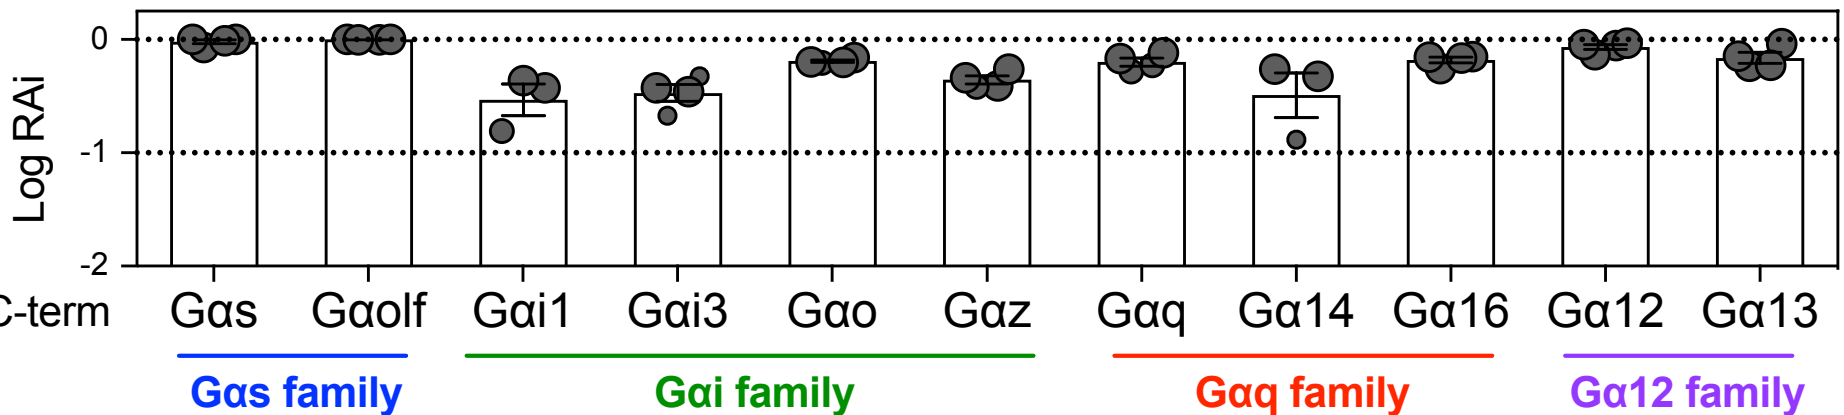

GPCR gene symbol: *MRGPRX2*

GPCR name: MRGX2

Tested ligand: Cortistatin-14

### C-terminal chimera co-expression

#### Gas family

#### Gai family

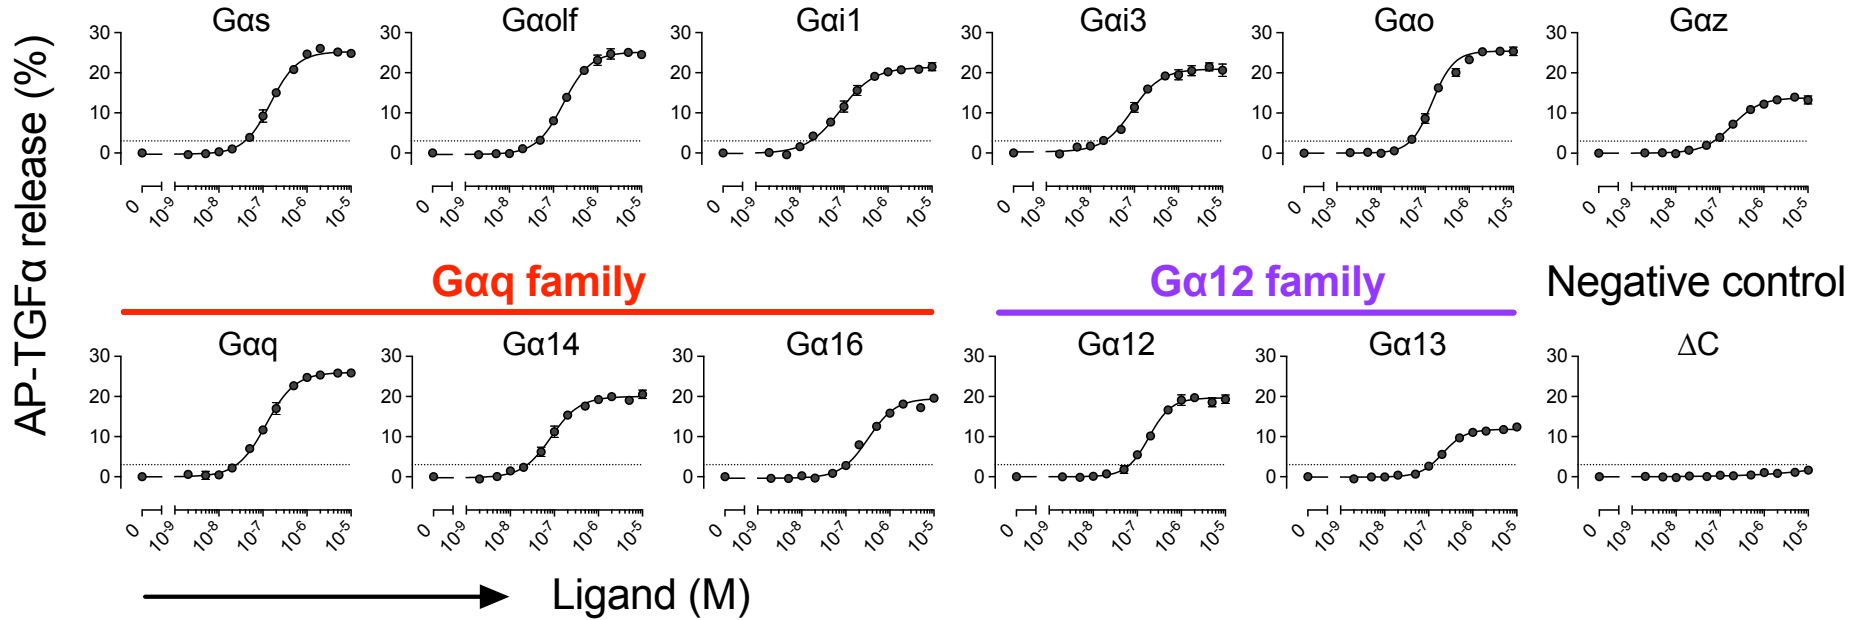

$E_{max}$  (%AP-TGFα release)    ● <3%    ● 3-5%    ● 5-10%    ● >10%

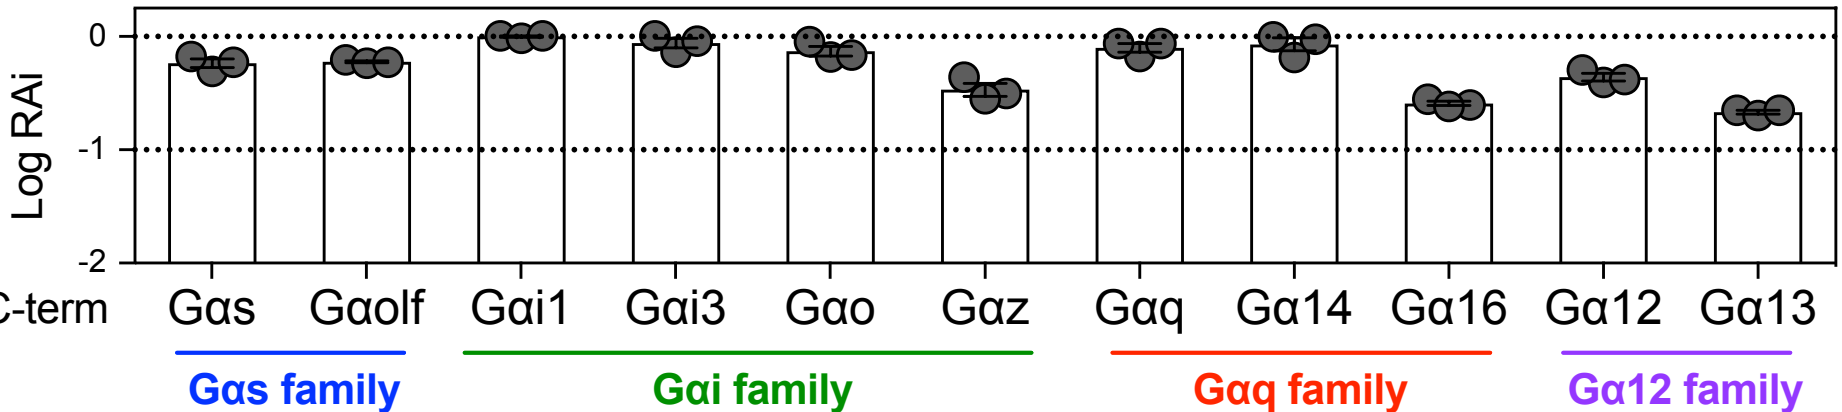

GPCR gene symbol: *MTNR1A*

GPCR name: MT1

Tested ligand: Melatonin

### C-terminal chimera co-expression

#### Gas family

#### Gai family

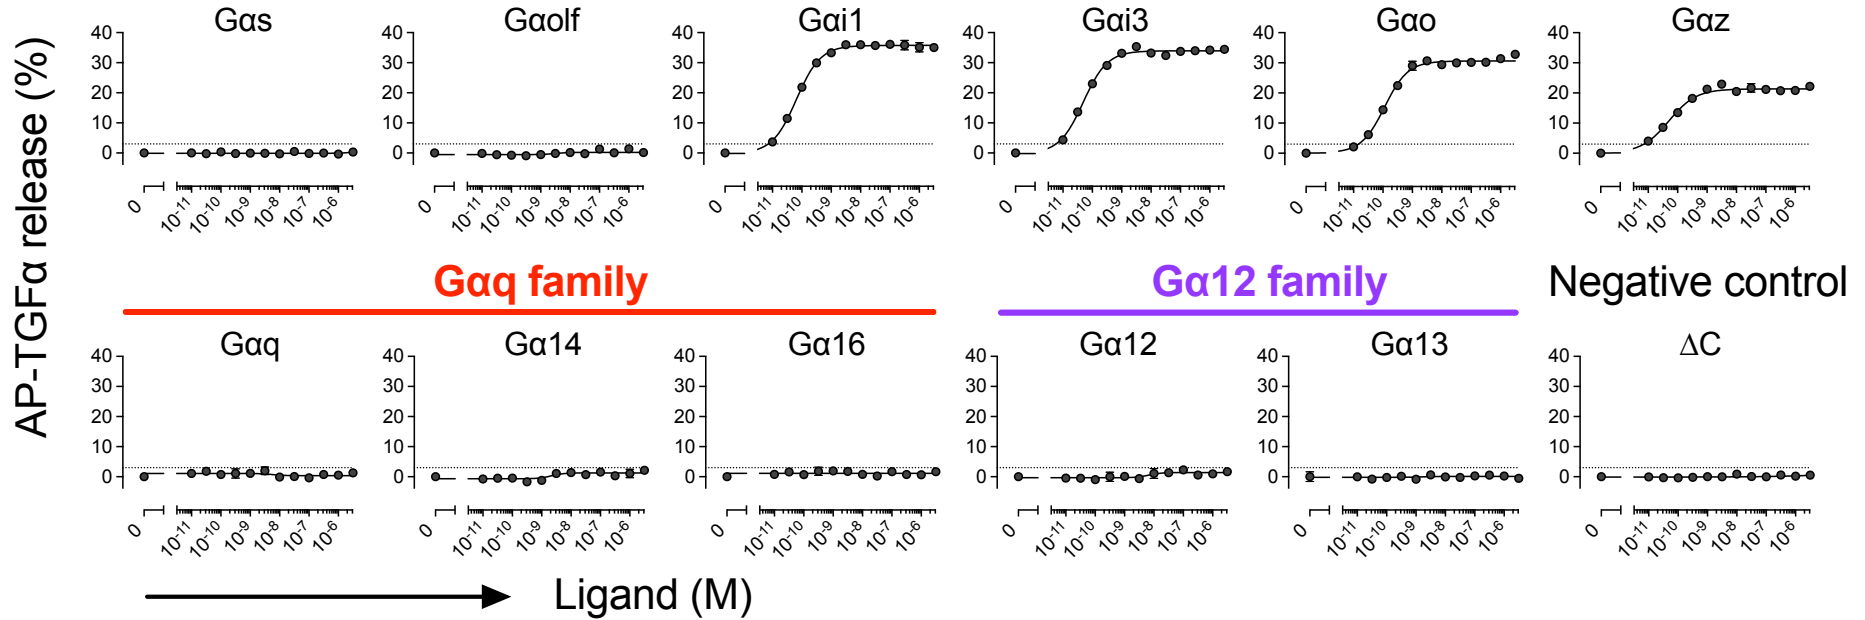

$E_{max}$  (%AP-TGF $\alpha$  release)

● <3%   ● 3-5%   ● 5-10%   ● >10%

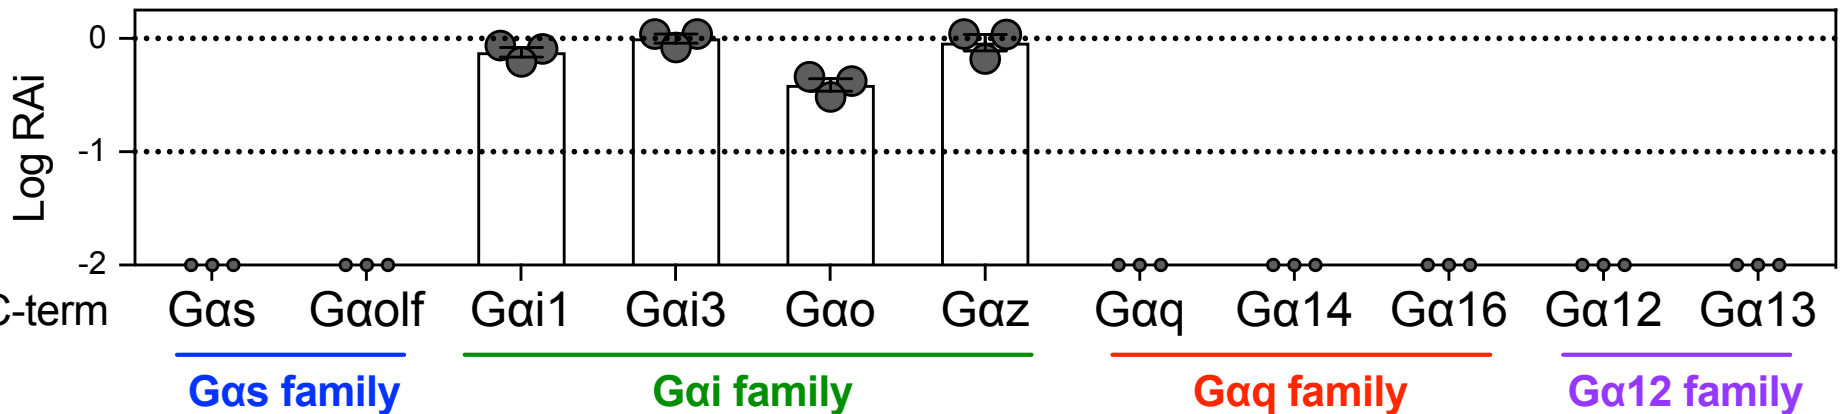

GPCR gene symbol: *MTNR1B*

GPCR name: MT2

Tested ligand: Melatonin

### C-terminal chimera co-expression

#### Gas family

#### Gai family

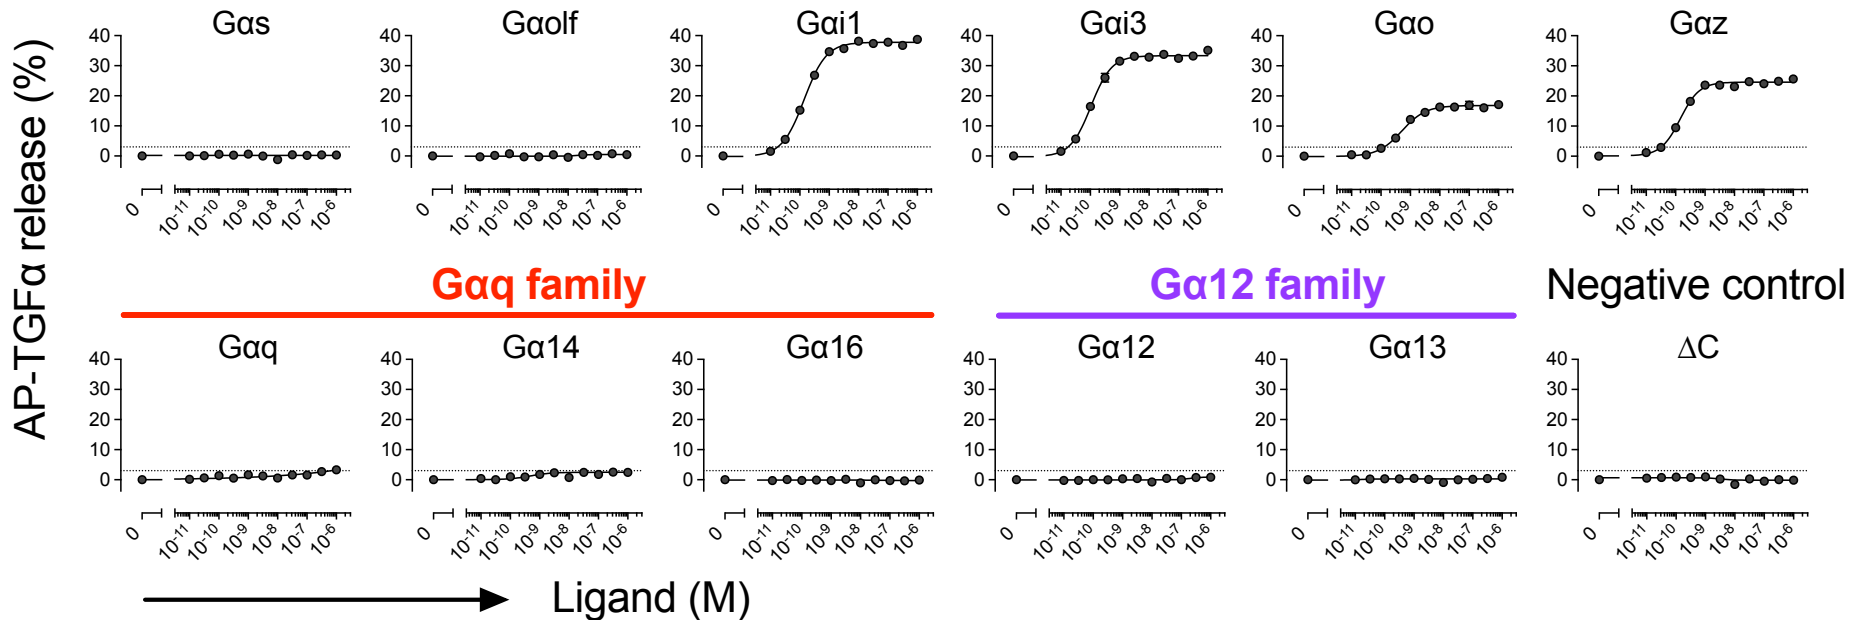

$E_{max}$  (%AP-TGFα release)

● <3%   ● 3-5%   ● 5-10%   ● >10%

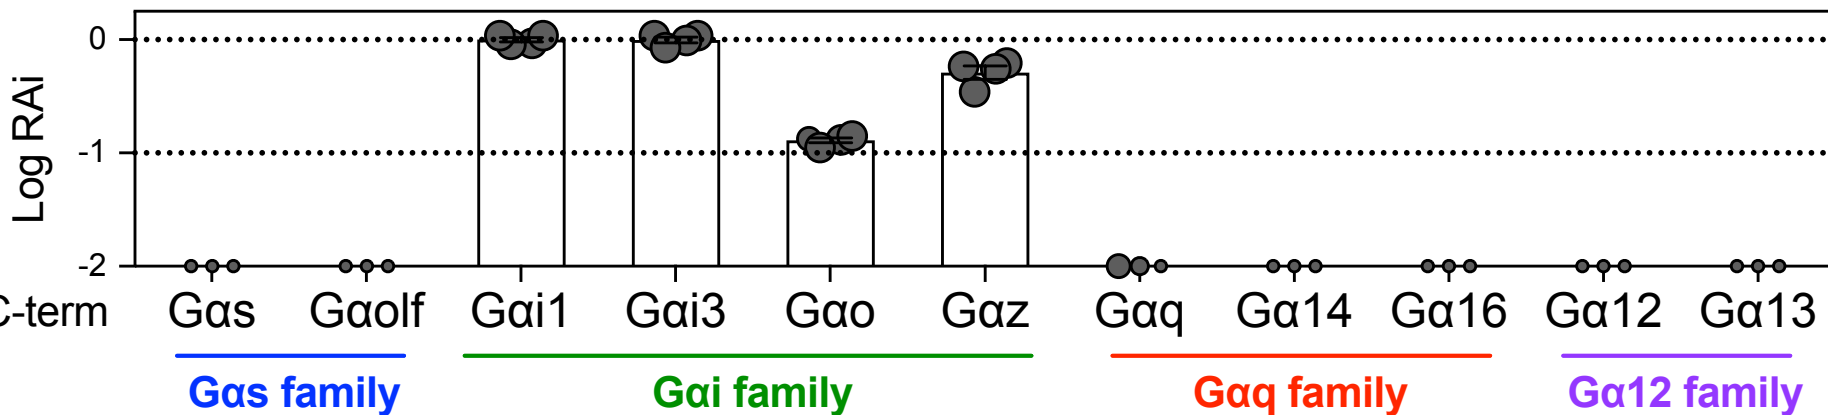

GPCR gene symbol: *NMBR*

GPCR name: BB1

Tested ligand: Neuromedin B

### C-terminal chimera co-expression

#### Gas family

#### Gai family

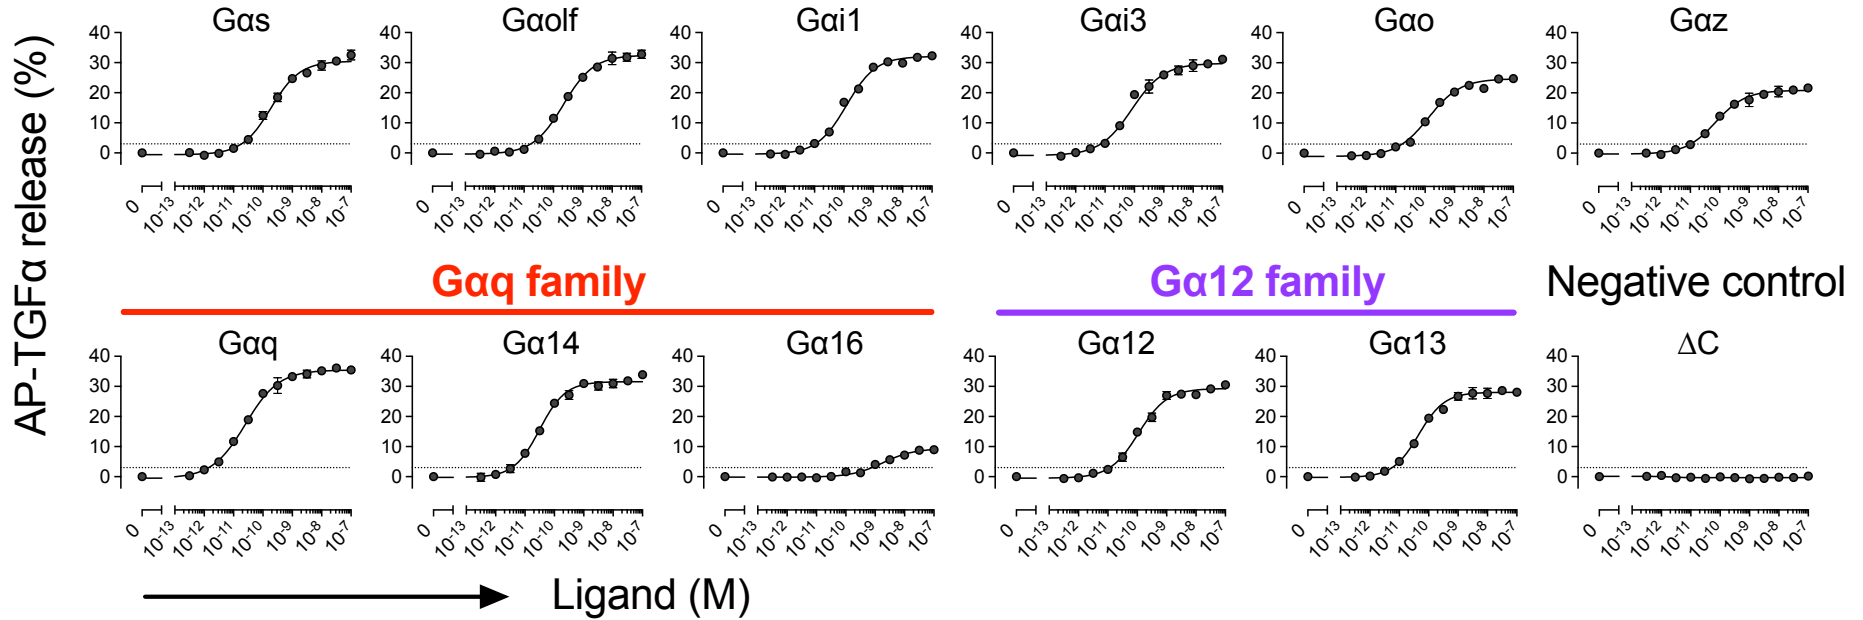

$E_{max}$  (%AP-TGFα release)    ● <math><3\%</math>    ● <math>3-5\%</math>    ● <math>5-10\%</math>    ● <math>>10\%</math>

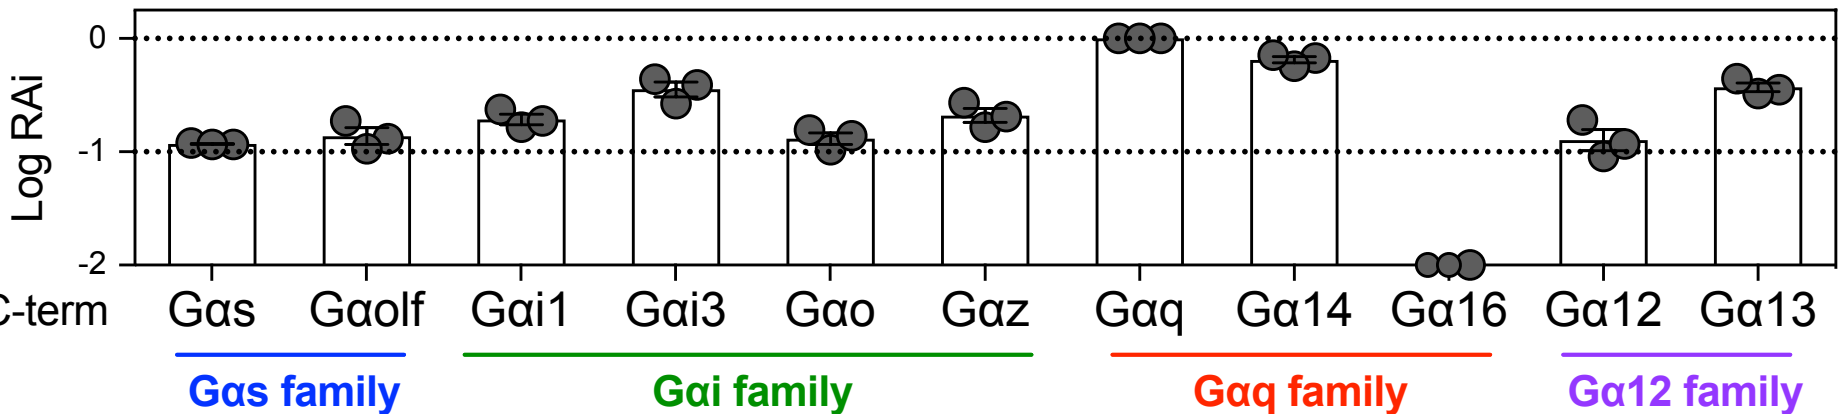

GPCR gene symbol: *NMUR1*  
 GPCR name: NMU1  
 Tested ligand: Neuromedin U-25

### C-terminal chimera co-expression

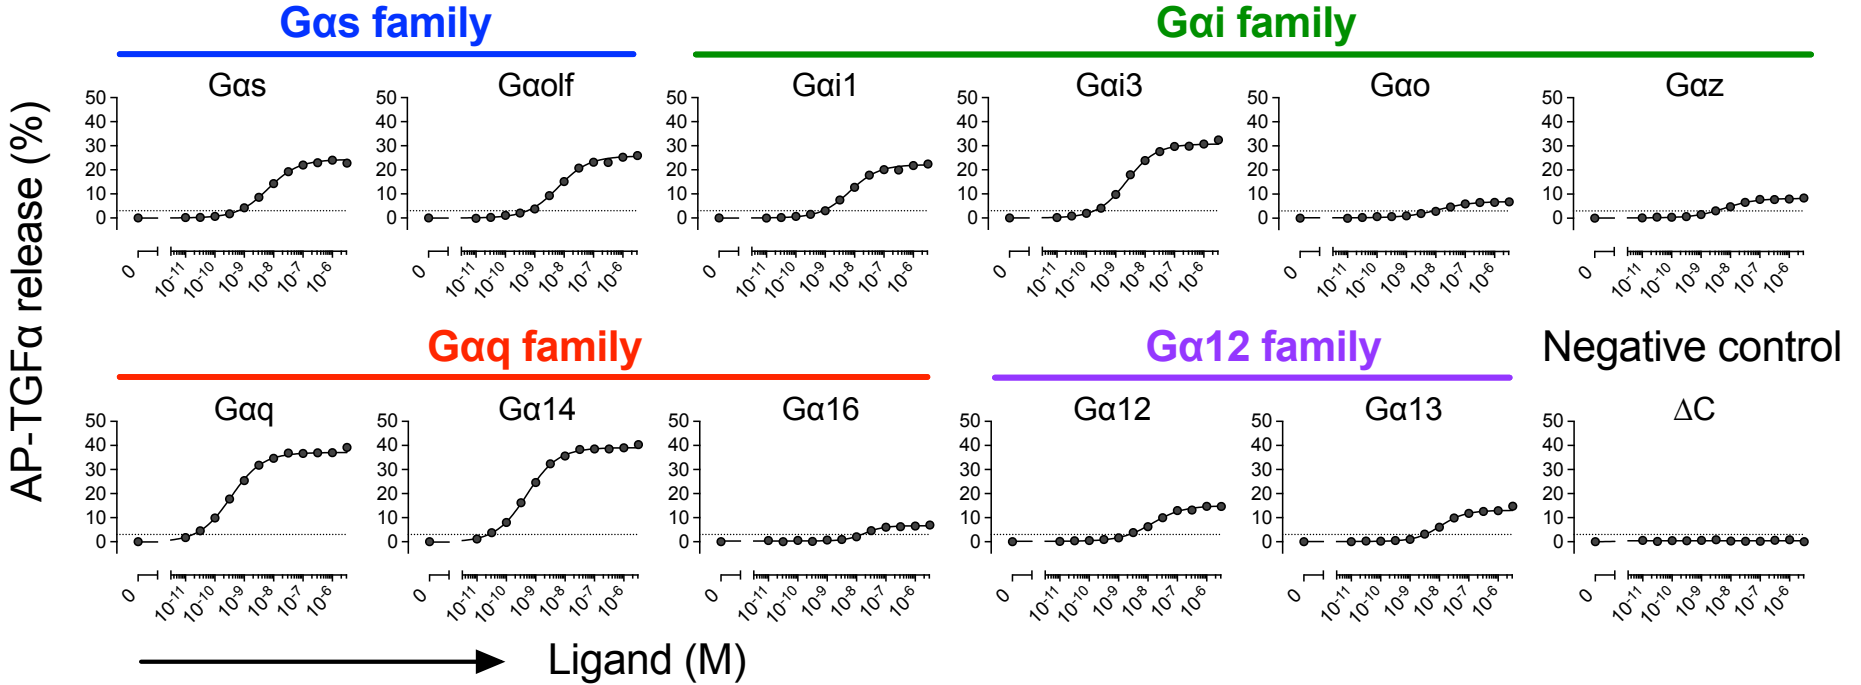

$E_{max}$  (%AP-TGFα release)    ● <3%    ● 3-5%    ● 5-10%    ● >10%

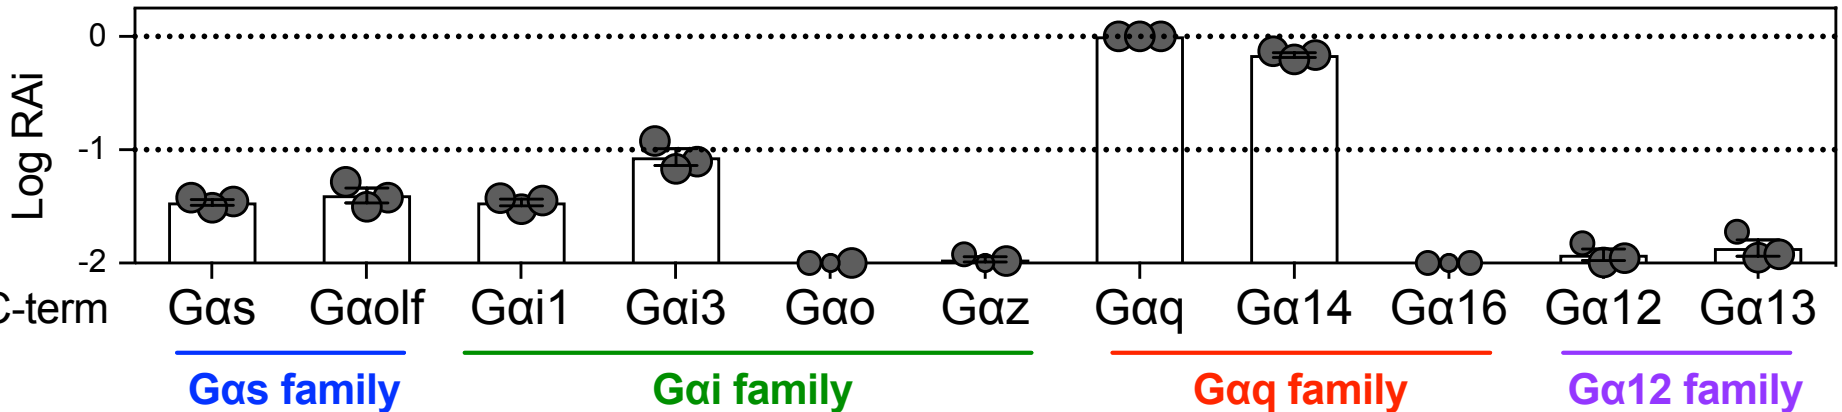



GPCR gene symbol: *NMUR2*  
 GPCR name: NMU2  
 Tested ligand: Neuromedin U-25

### C-terminal chimera co-expression

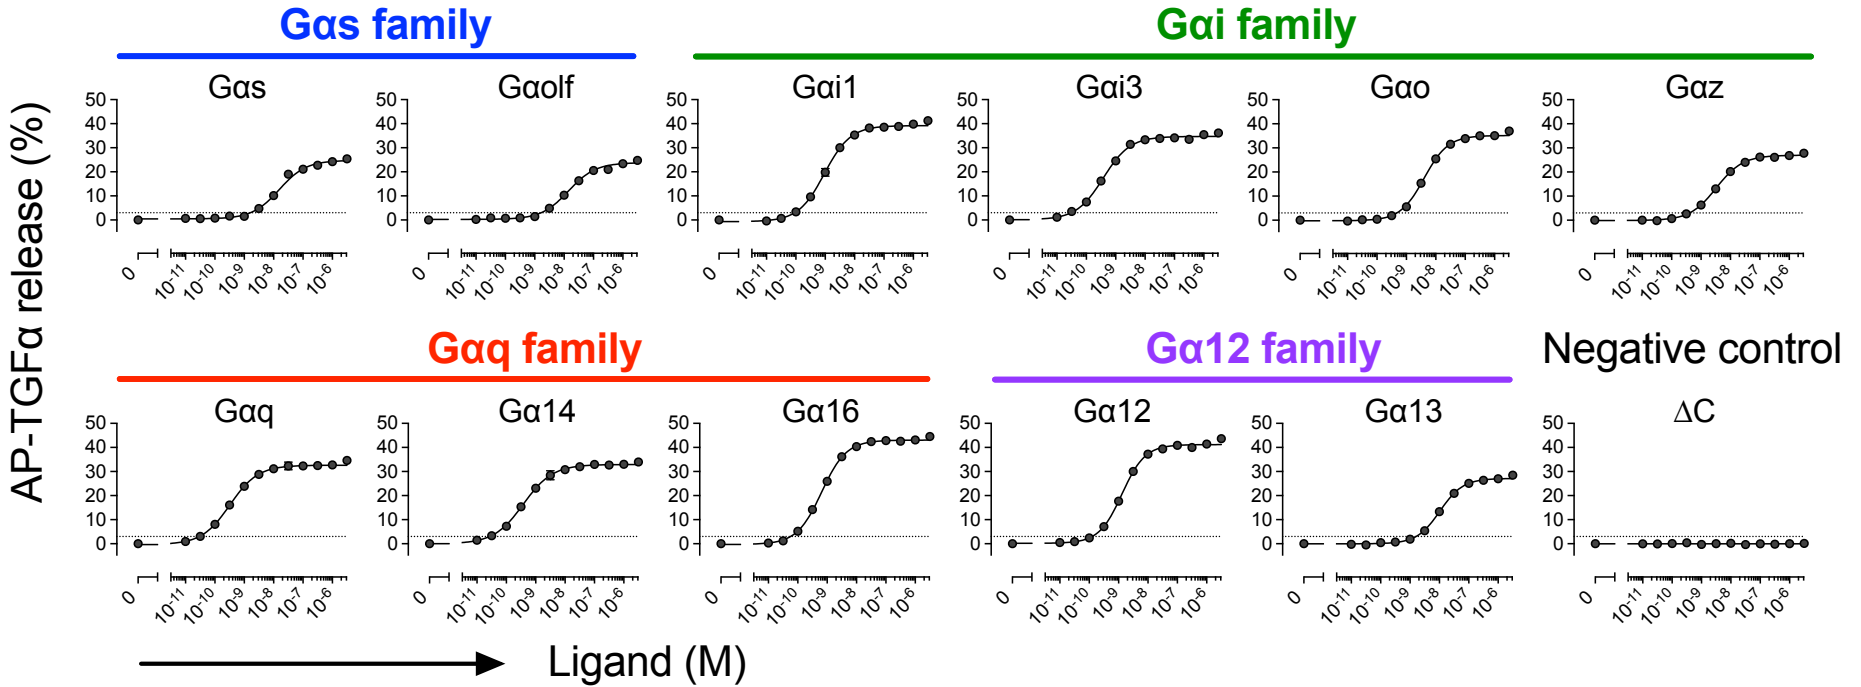

$E_{max}$  (%AP-TGFα release)    ● <3%    ● 3-5%    ● 5-10%    ● >10%

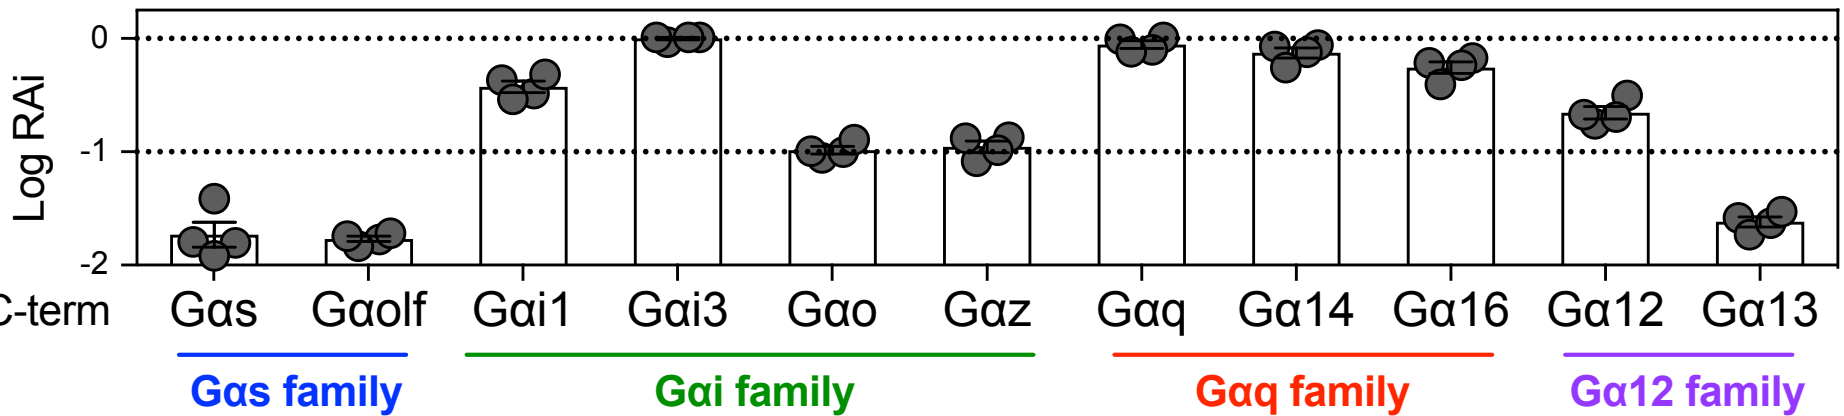

GPCR gene symbol: *NPBWR1*

GPCR name: NPBW1

Tested ligand: Neuropeptide W-30

### C-terminal chimera co-expression

#### Gas family

#### Gai family

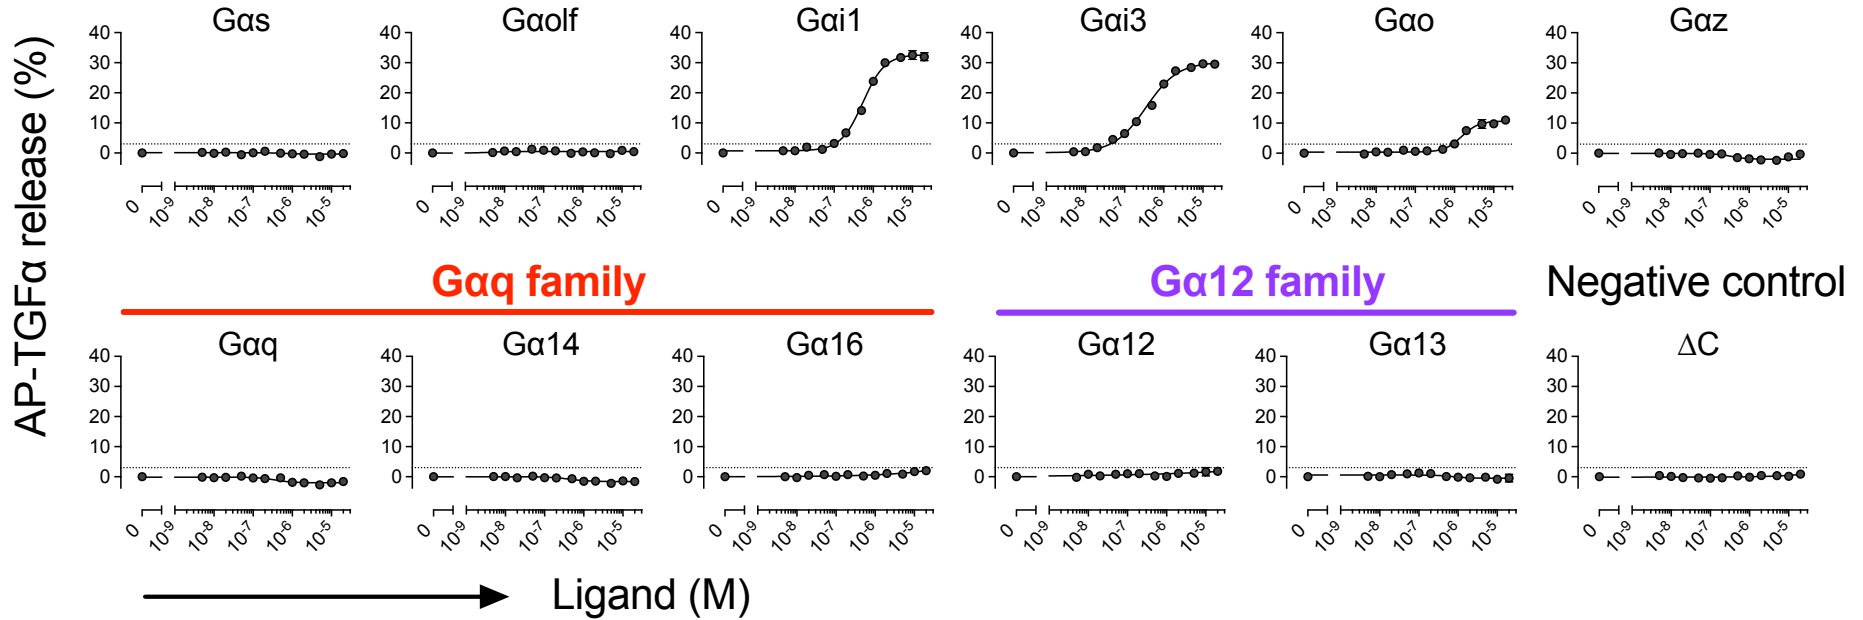

$E_{max}$  (%AP-TGFα release)    ● <3%    ● 3-5%    ● 5-10%    ● >10%

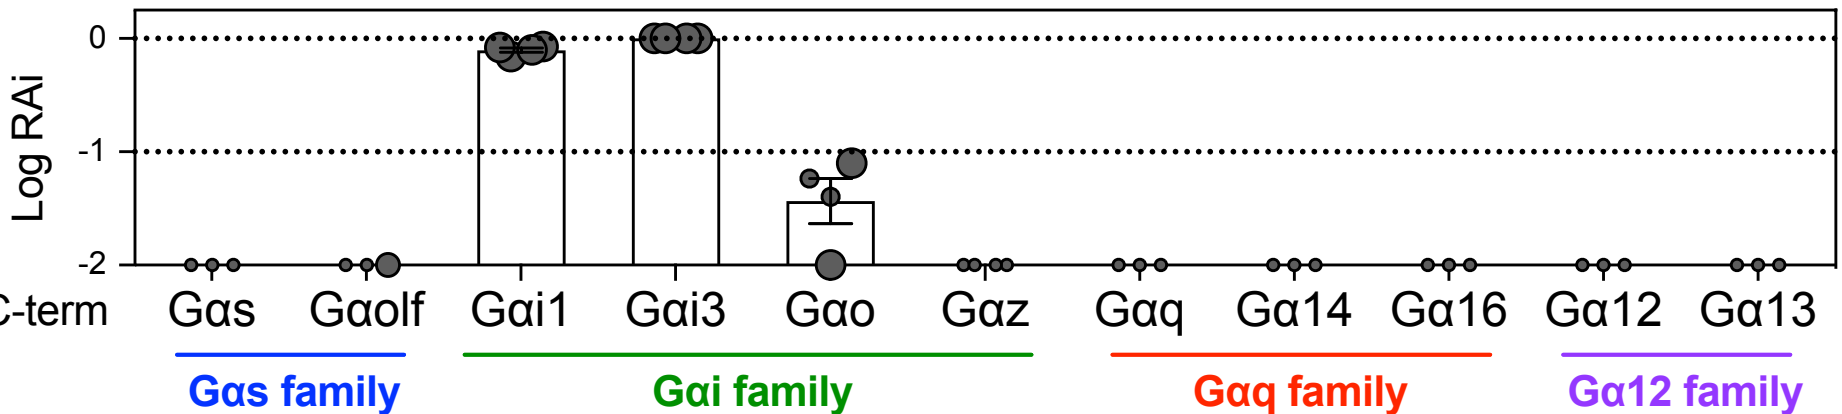

GPCR gene symbol: *NPFFR1*

GPCR name: NPFF1

Tested ligand: Neuropeptide FF

### C-terminal chimera co-expression

#### Gas family

#### Gai family

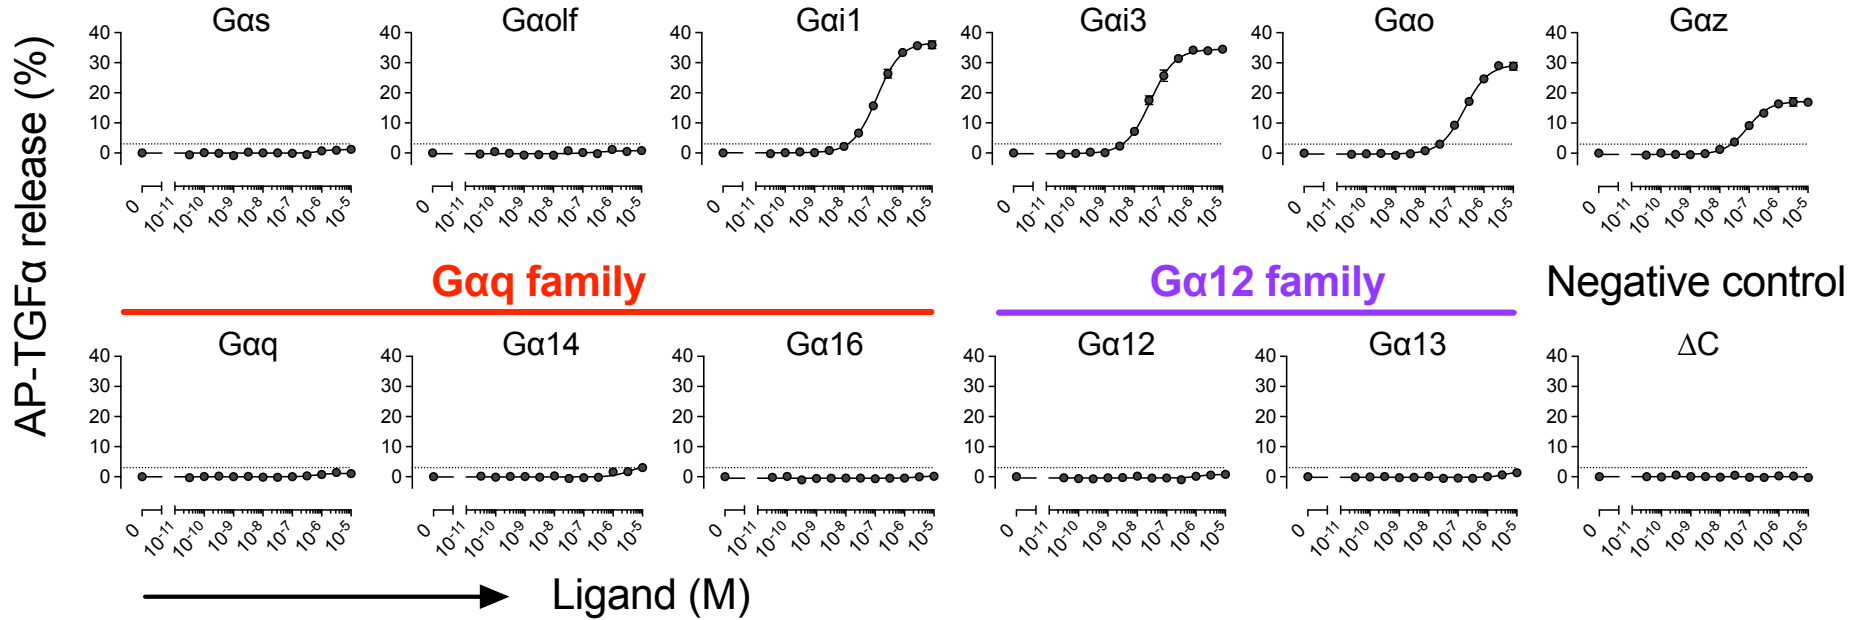

$E_{max}$  (%AP-TGFα release)    ● <3%    ● 3-5%    ● 5-10%    ● >10%

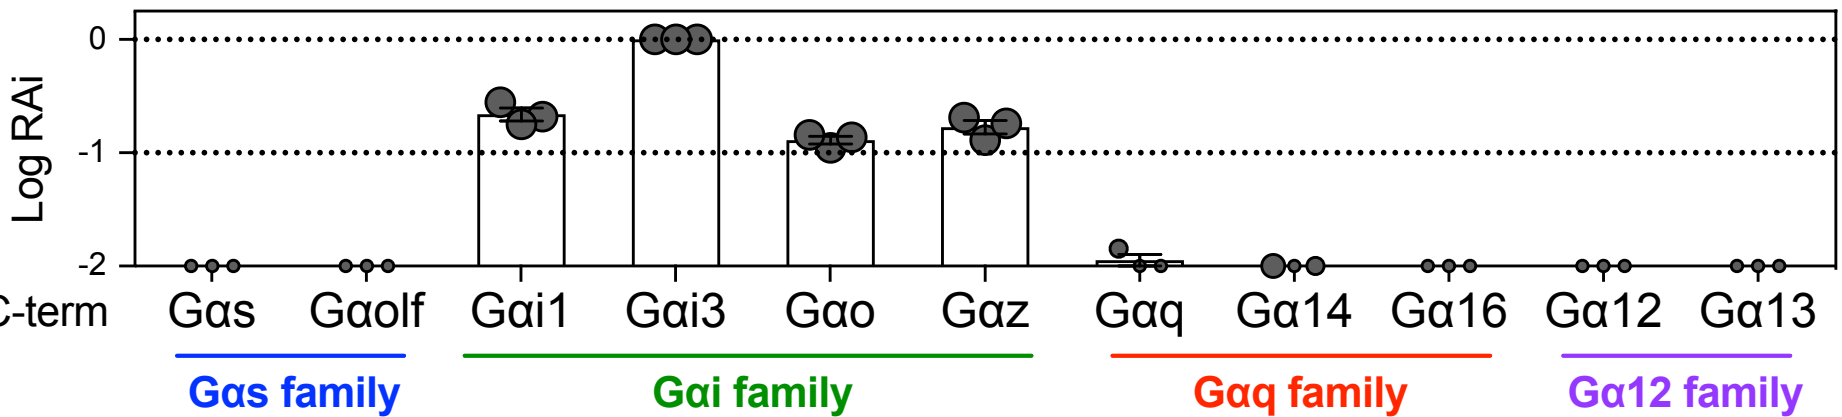

GPCR gene symbol: *NPFFR2*  
 GPCR name: NPFF2  
 Tested ligand: Neuropeptide FF

### C-terminal chimera co-expression

#### Gas family

#### Gai family

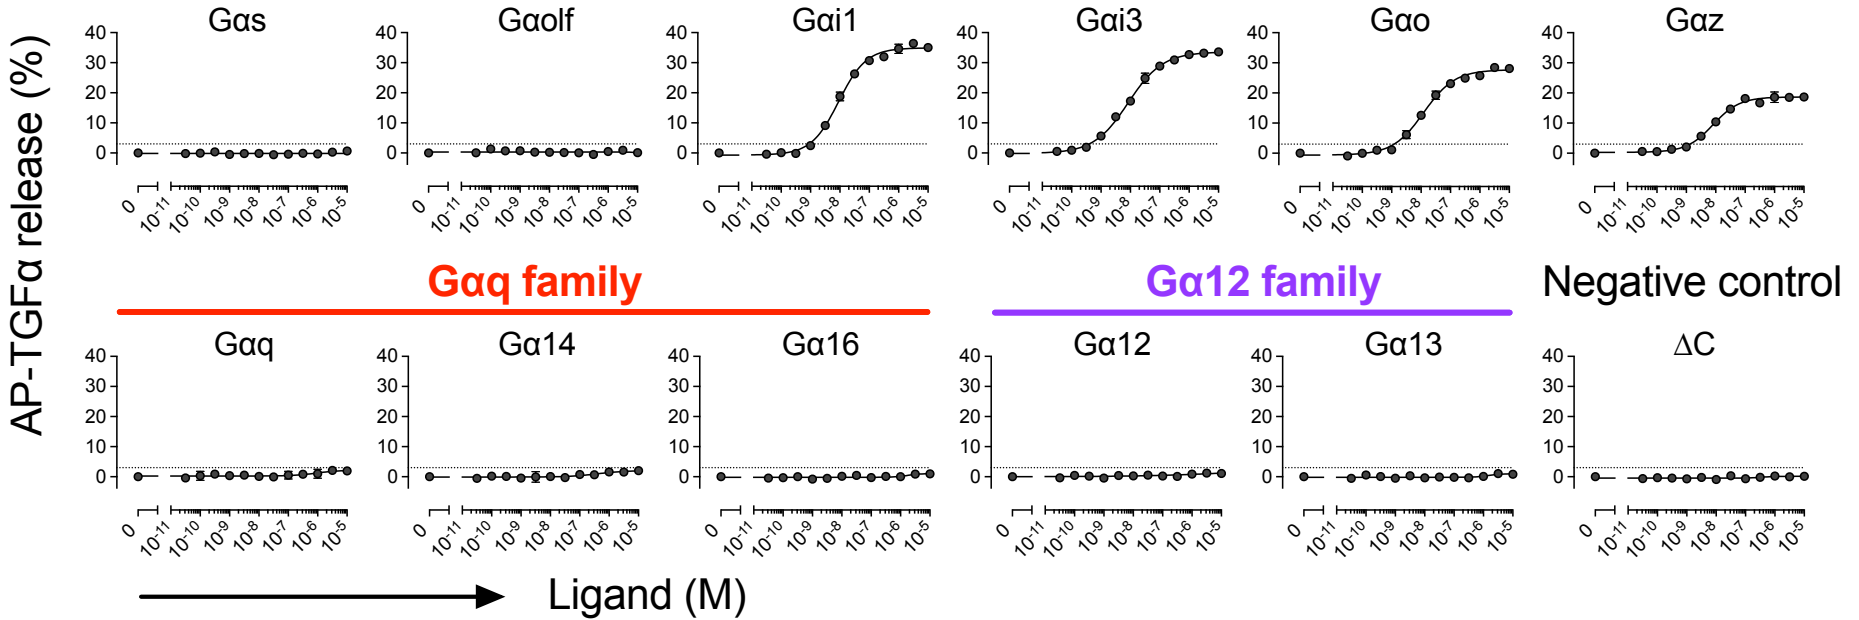

$E_{max}$  (%AP-TGFα release)    ● <3%    ● 3-5%    ● 5-10%    ● >10%

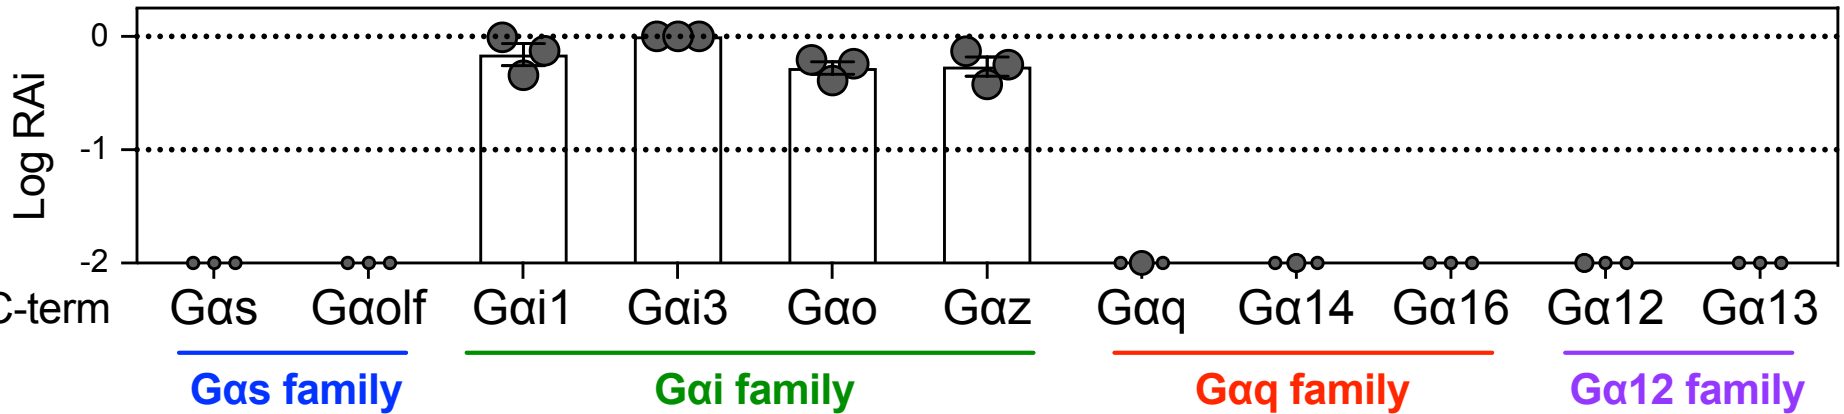

GPCR gene symbol: *OPRD1*

GPCR name:  $\delta$

Tested ligand: Methionine-Enkephalin

### C-terminal chimera co-expression

#### Gas family

#### Gai family

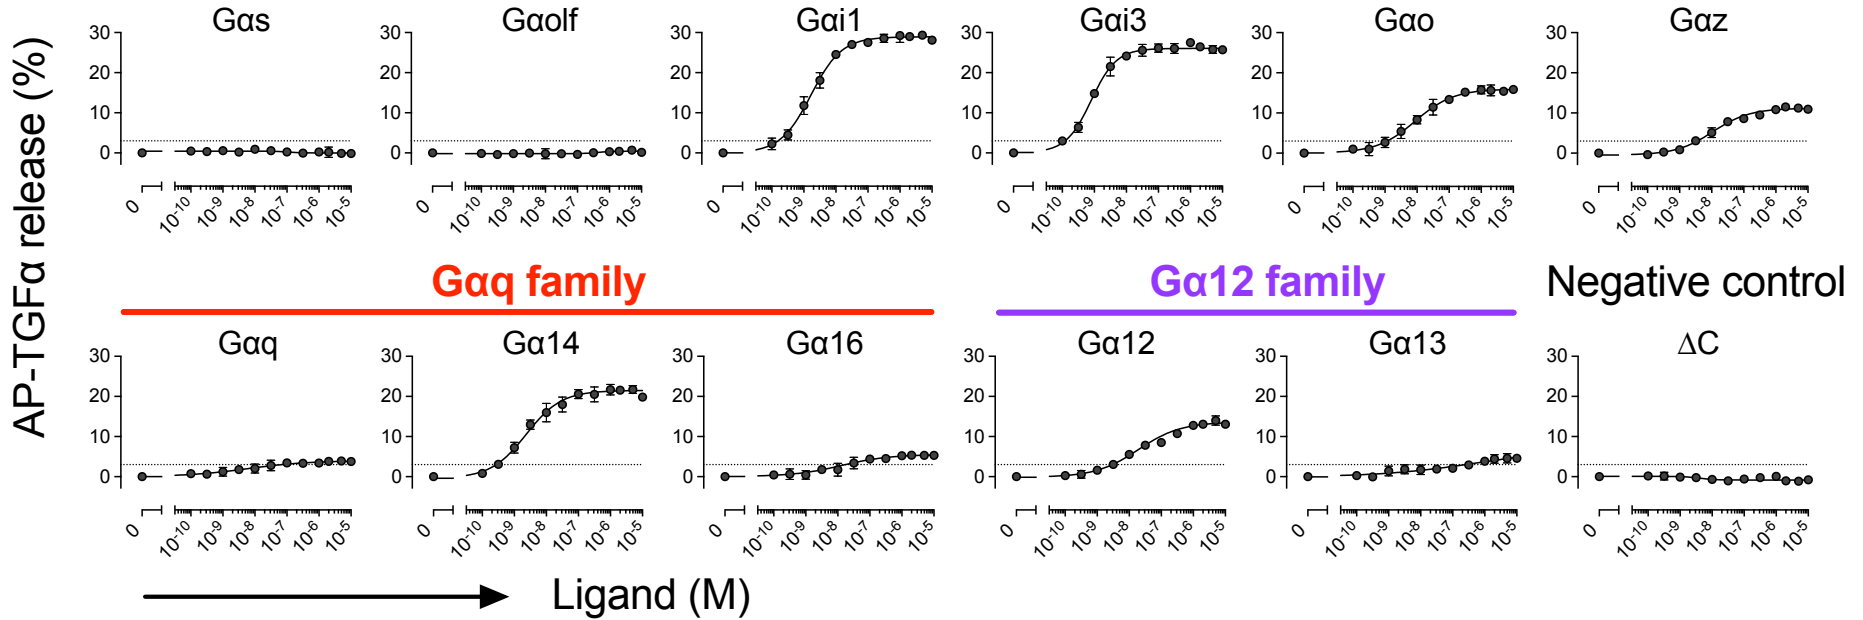

$E_{max}$  (%AP-TGF $\alpha$  release)    ● <3%    ● 3-5%    ● 5-10%    ● >10%

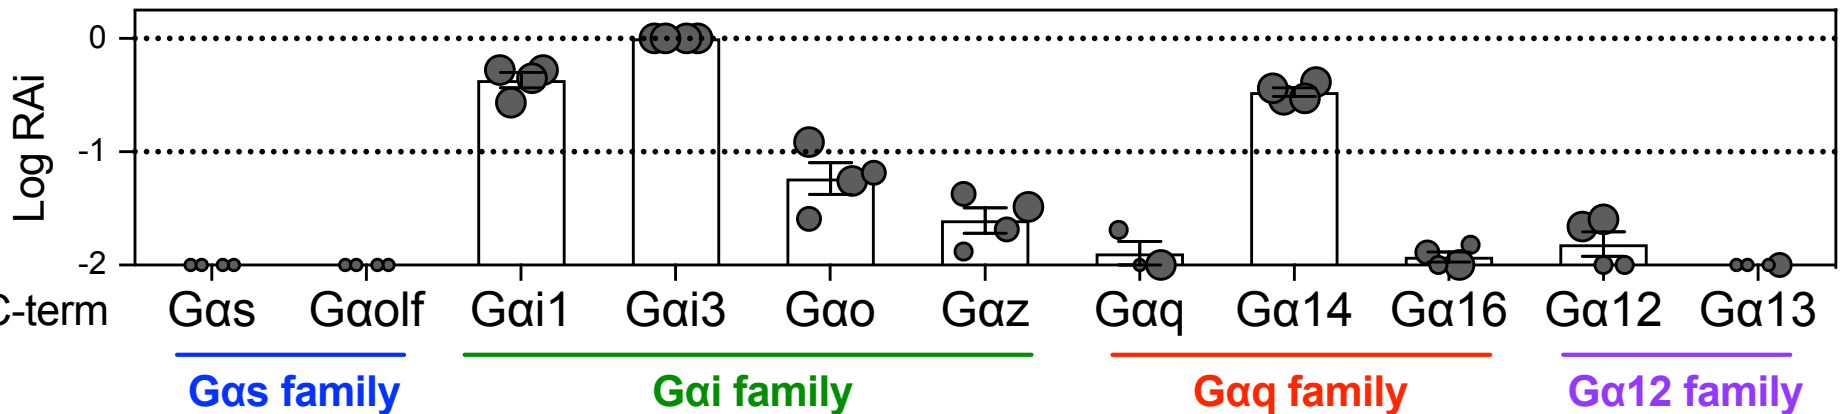

GPCR gene symbol: *OPRK1*

GPCR name:  $\kappa$

Tested ligand: Dynorphin-A

### C-terminal chimera co-expression

#### Gas family

#### Gai family

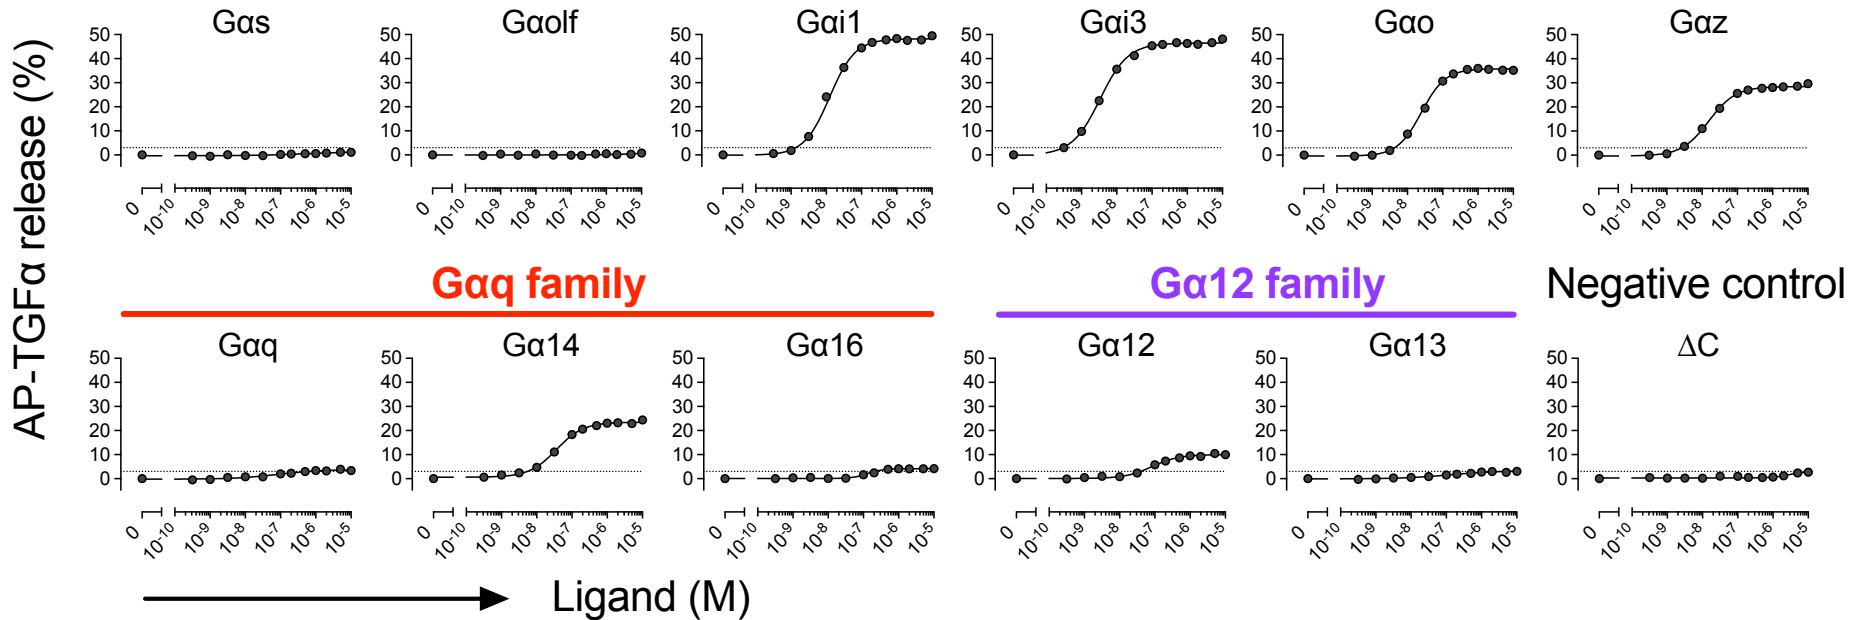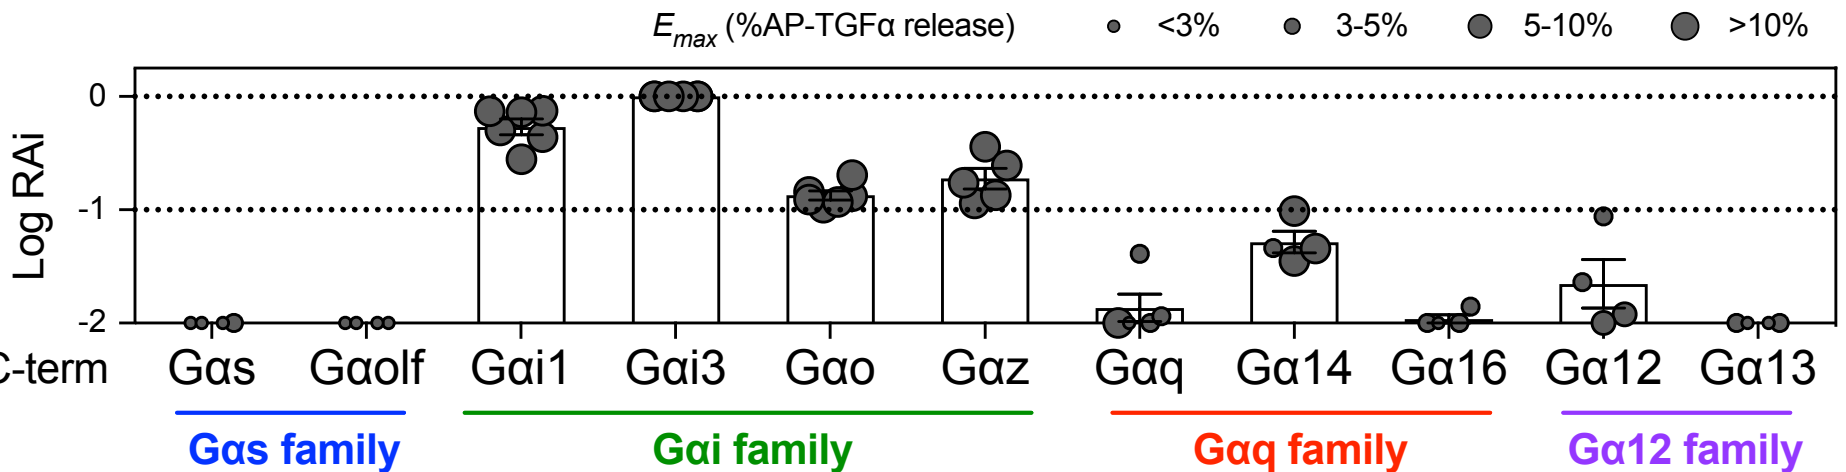

GPCR gene symbol: *OPRL1*

GPCR name: NOP

Tested ligand: Nociceptin

### C-terminal chimera co-expression

#### Gas family

#### Gai family

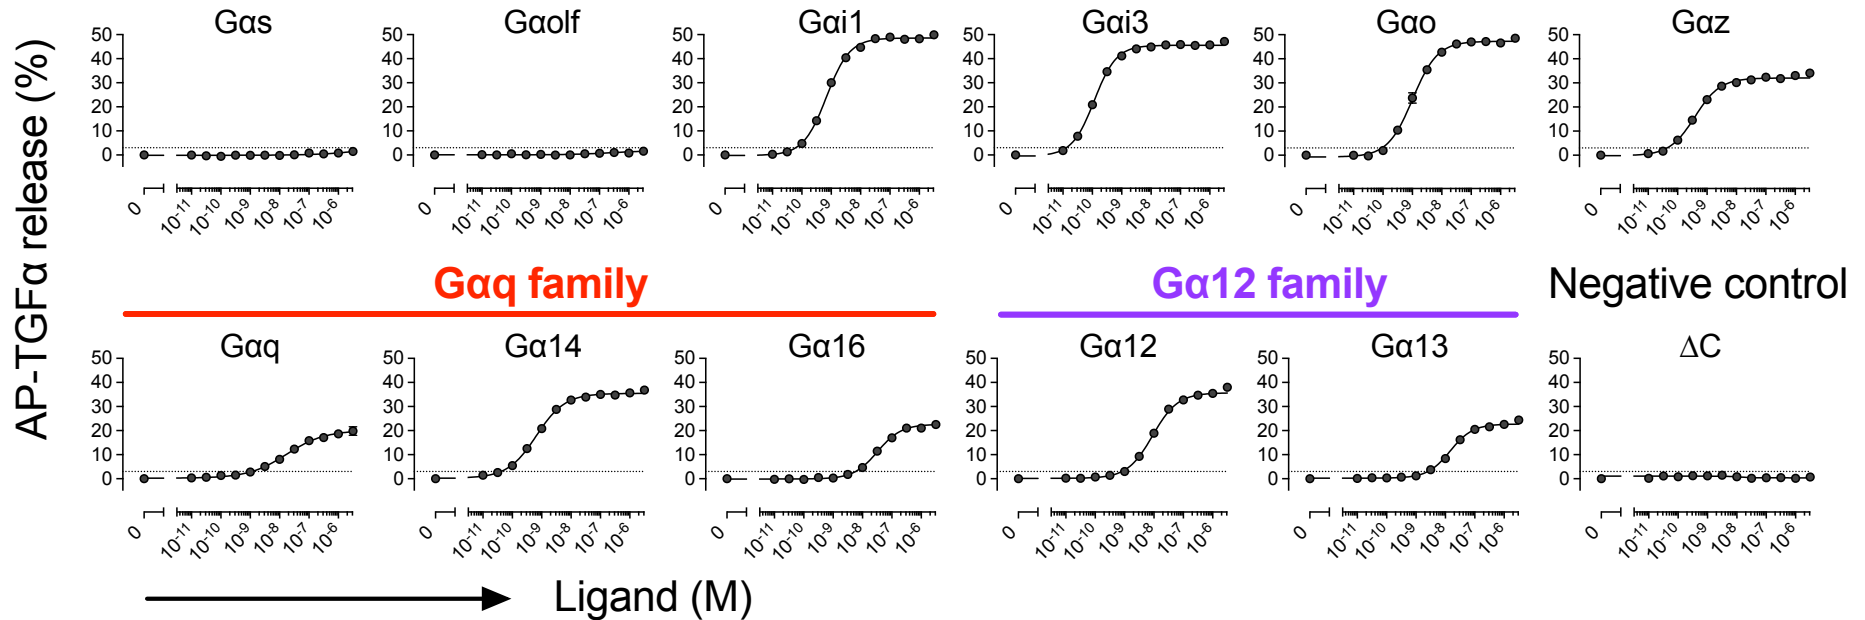

$E_{max}$  (%AP-TGFα release)

● <3%   ● 3-5%   ● 5-10%   ● >10%

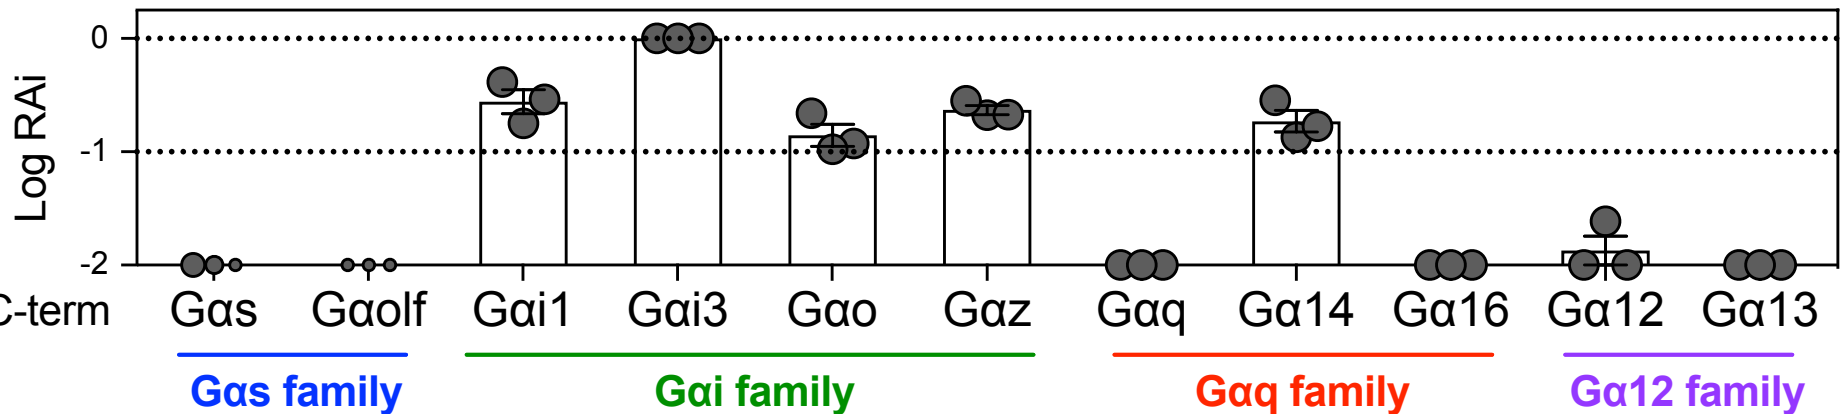

GPCR gene symbol: *OPRM1*  
 GPCR name:  $\mu$   
 Tested ligand: Methionine-Enkephalin

### C-terminal chimera co-expression

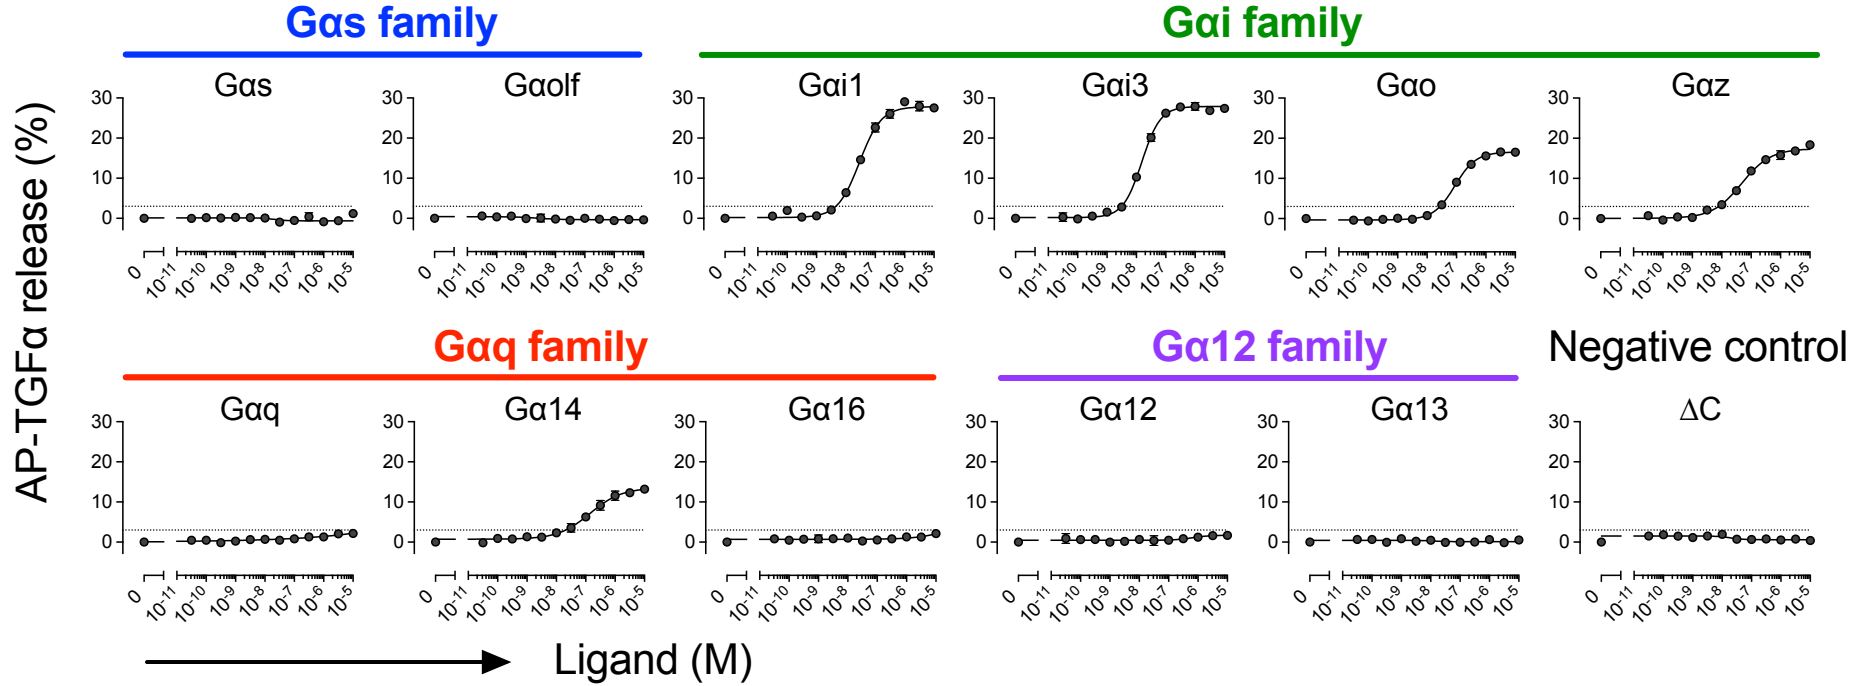

$E_{max}$  (%AP-TGF $\alpha$  release)    ● <3%    ● 3-5%    ● 5-10%    ● >10%

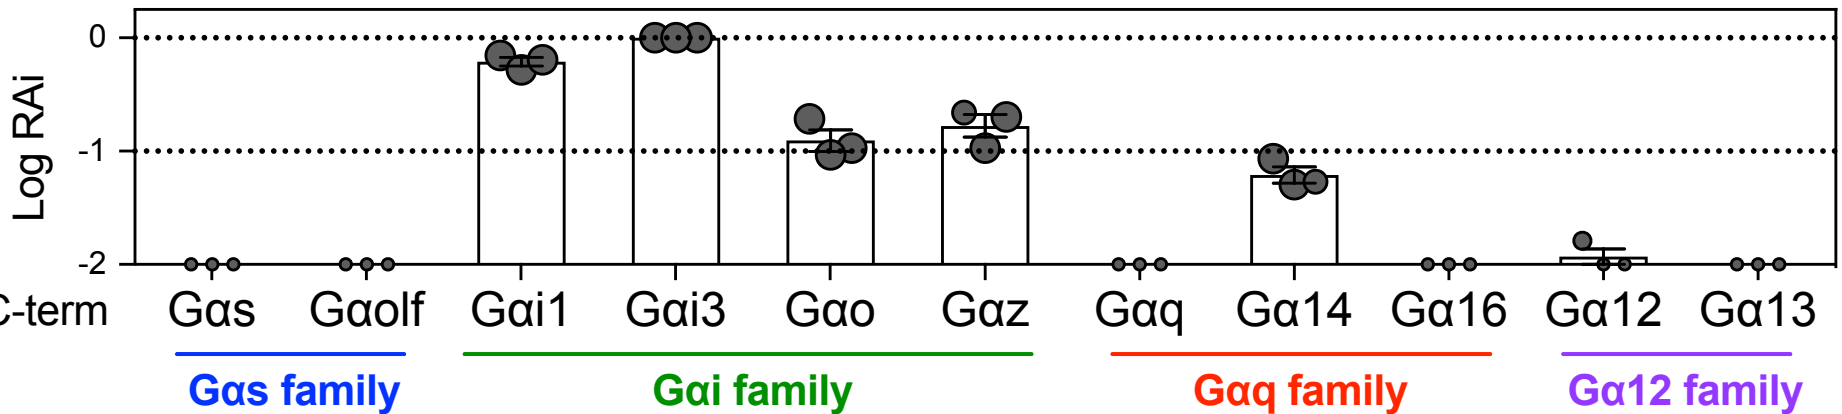



GPCR gene symbol: *OXGR1*

GPCR name: OXGR1

Tested ligand: 2-oxo-glutaric acid

### C-terminal chimera co-expression

#### Gas family

#### Gai family

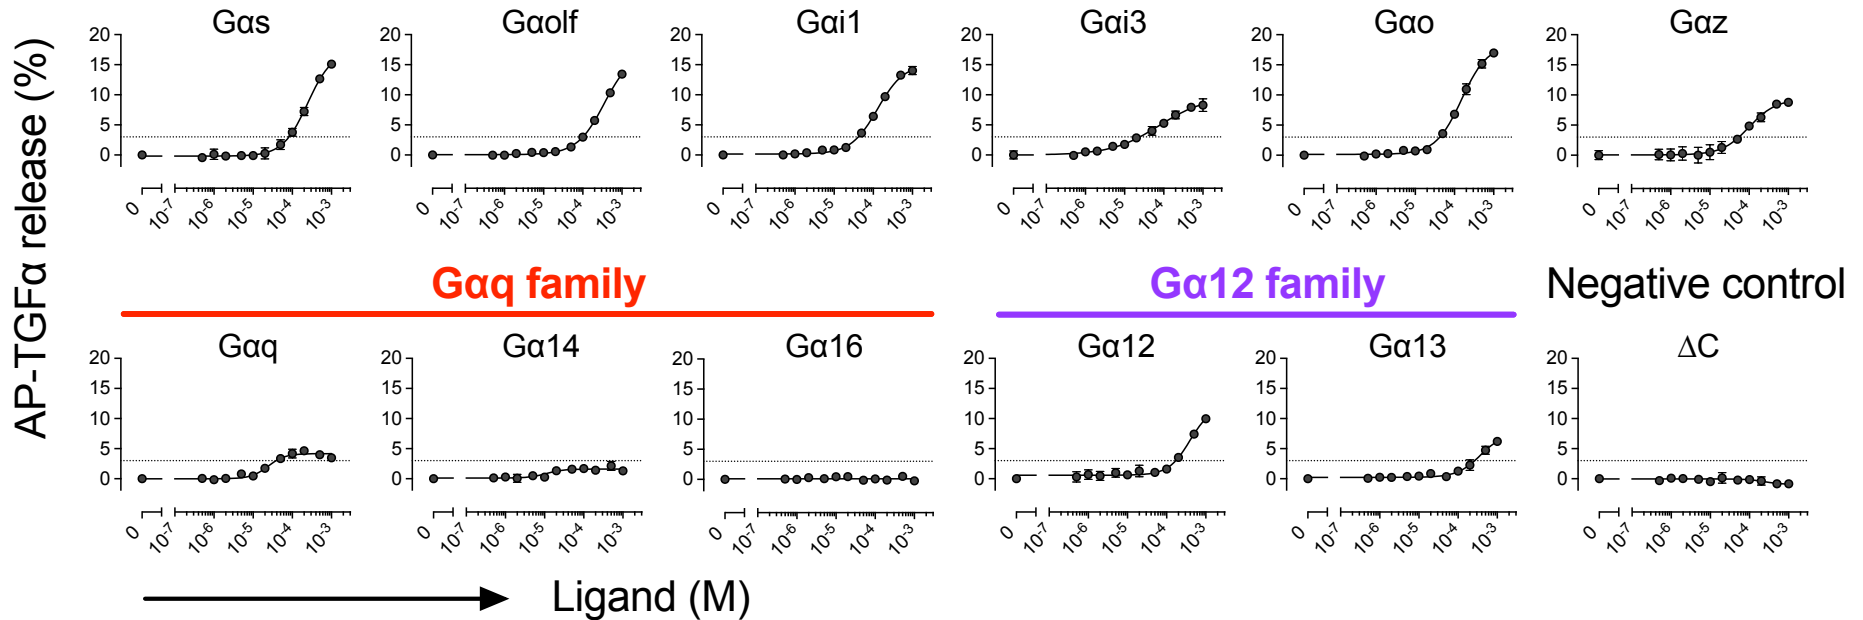

$E_{max}$  (%AP-TGFα release)

● <3%   ● 3-5%   ● 5-10%   ● >10%

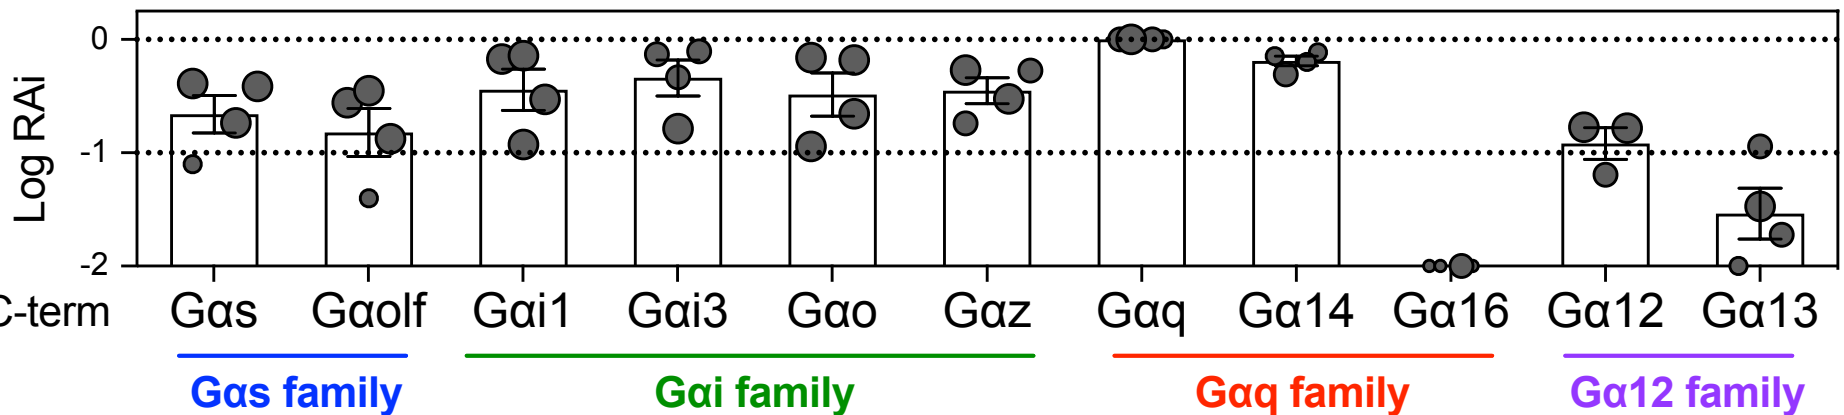

GPCR gene symbol: *OXTR*

GPCR name: OT

Tested ligand: Oxytocin

### C-terminal chimera co-expression

#### Gas family

#### Gai family

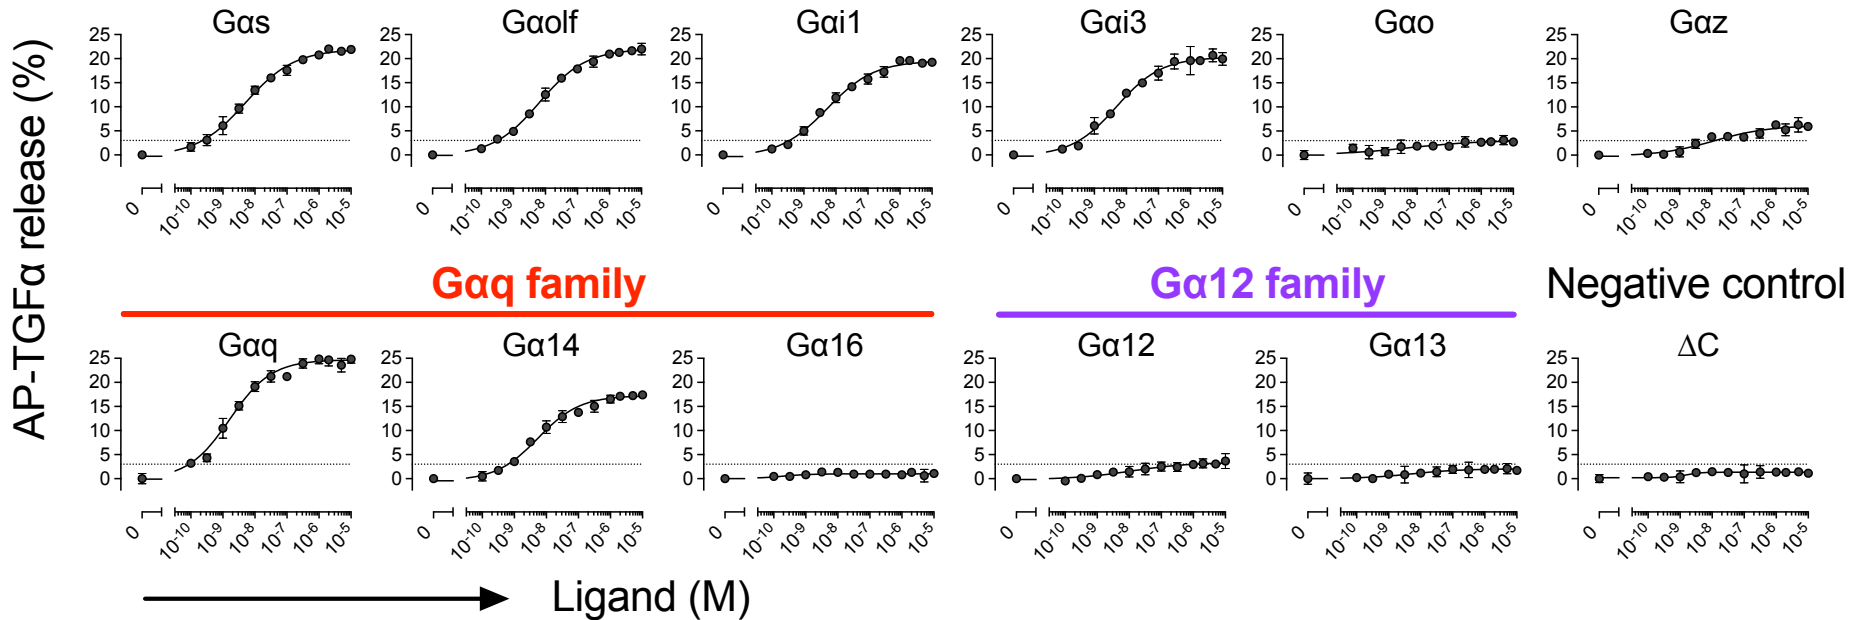

$E_{max}$  (%AP-TGFα release)    ● <3%    ● 3-5%    ● 5-10%    ● >10%

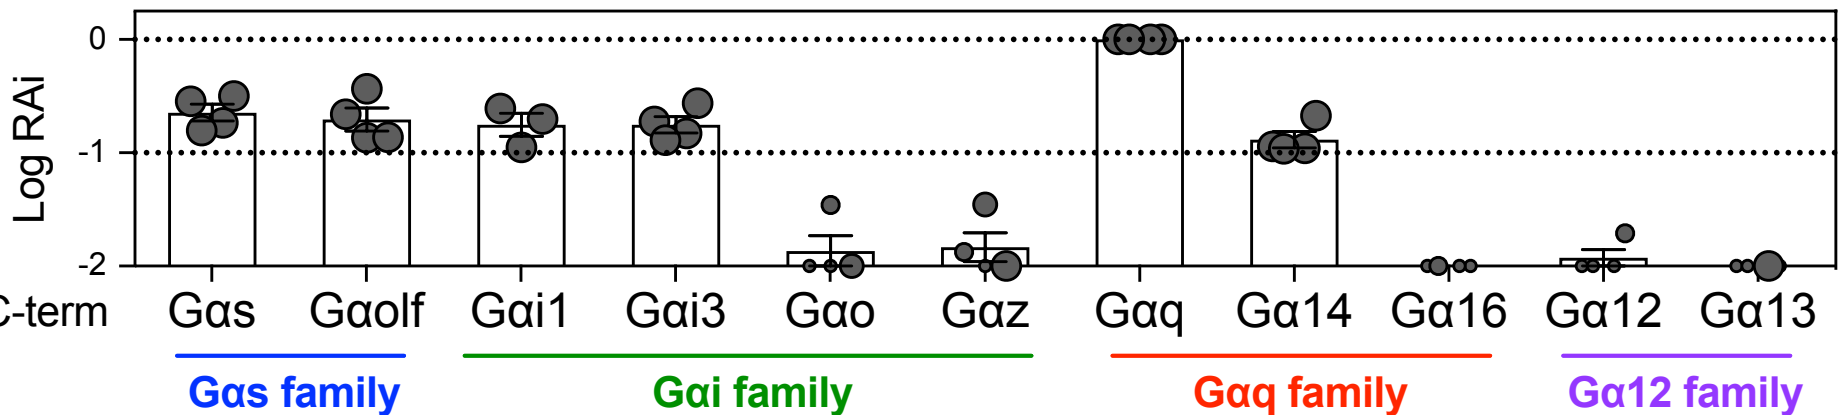

GPCR gene symbol: *P2RY1*

GPCR name: P2Y1

Tested ligand: ADP

### C-terminal chimera co-expression

#### Gas family

#### Gai family

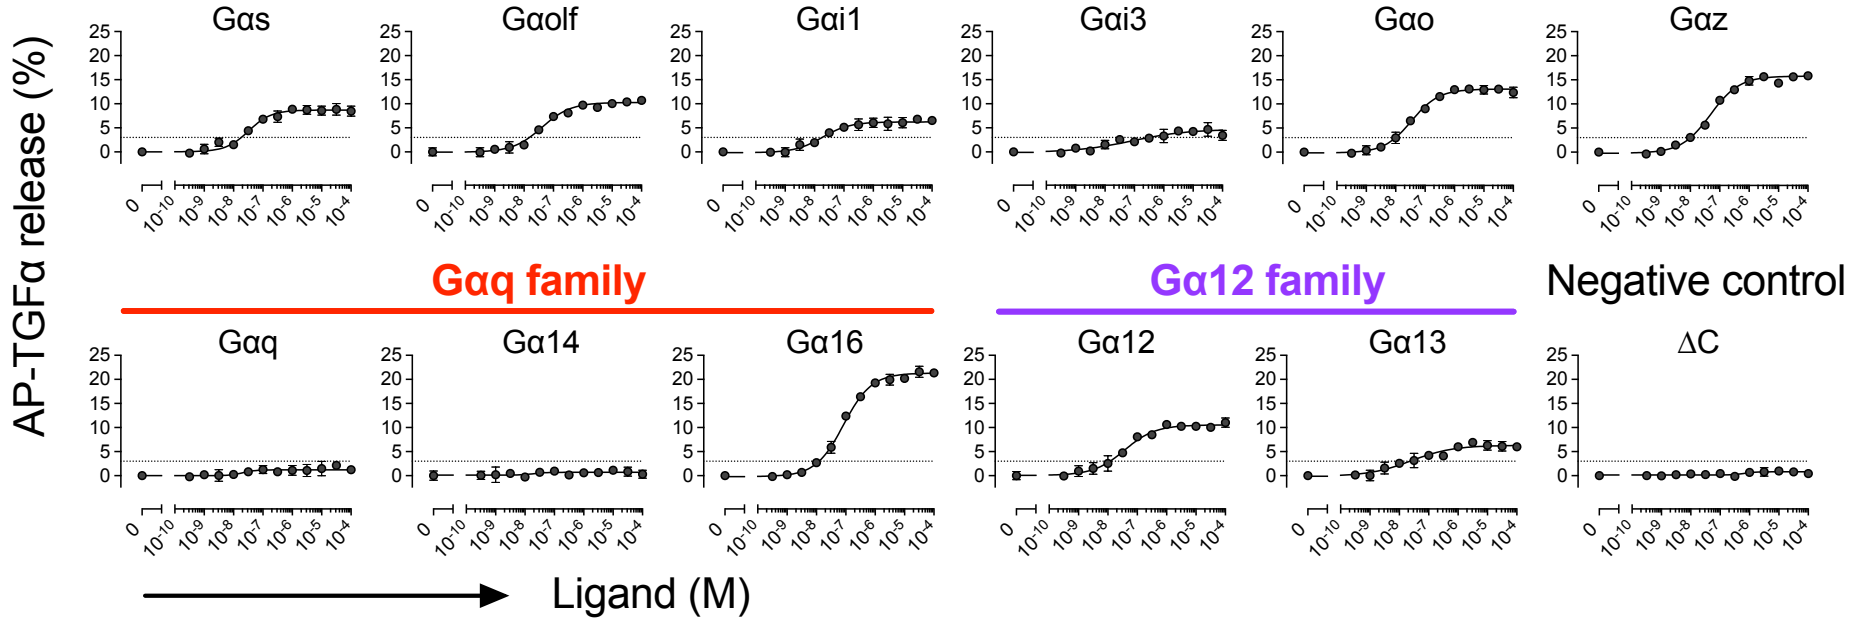

$E_{max}$  (%AP-TGFα release)

● <3%   ● 3-5%   ● 5-10%   ● >10%

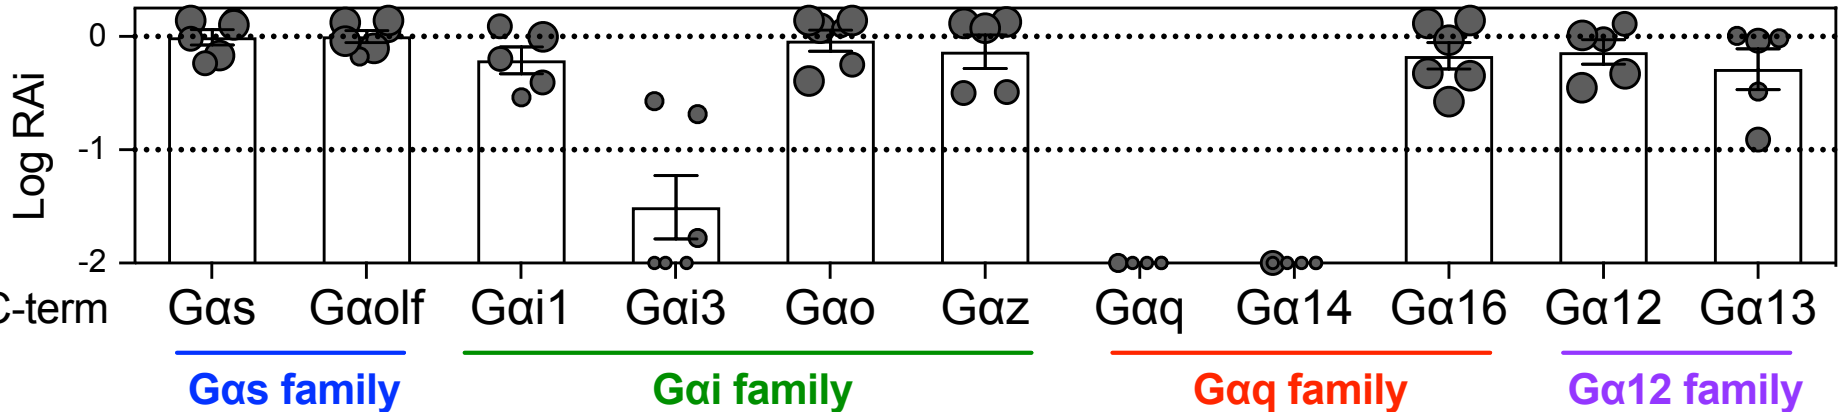

GPCR gene symbol: *P2RY10*

GPCR name: P2RY10

Tested ligand: Lysophosphatidylserine

### C-terminal chimera co-expression

#### Gas family

#### Gai family

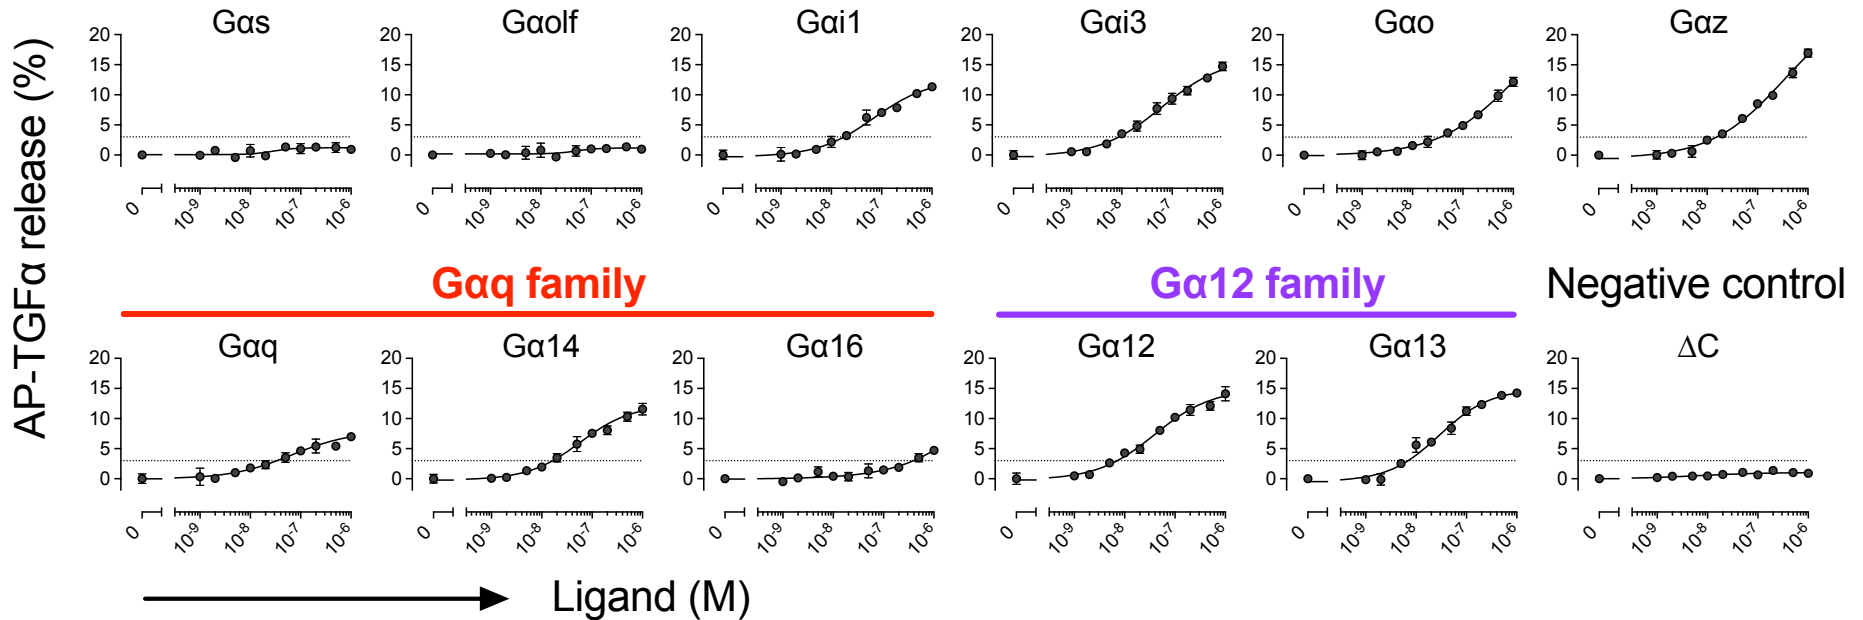

$E_{max}$  (%AP-TGFα release)

● <3%   ● 3-5%   ● 5-10%   ● >10%

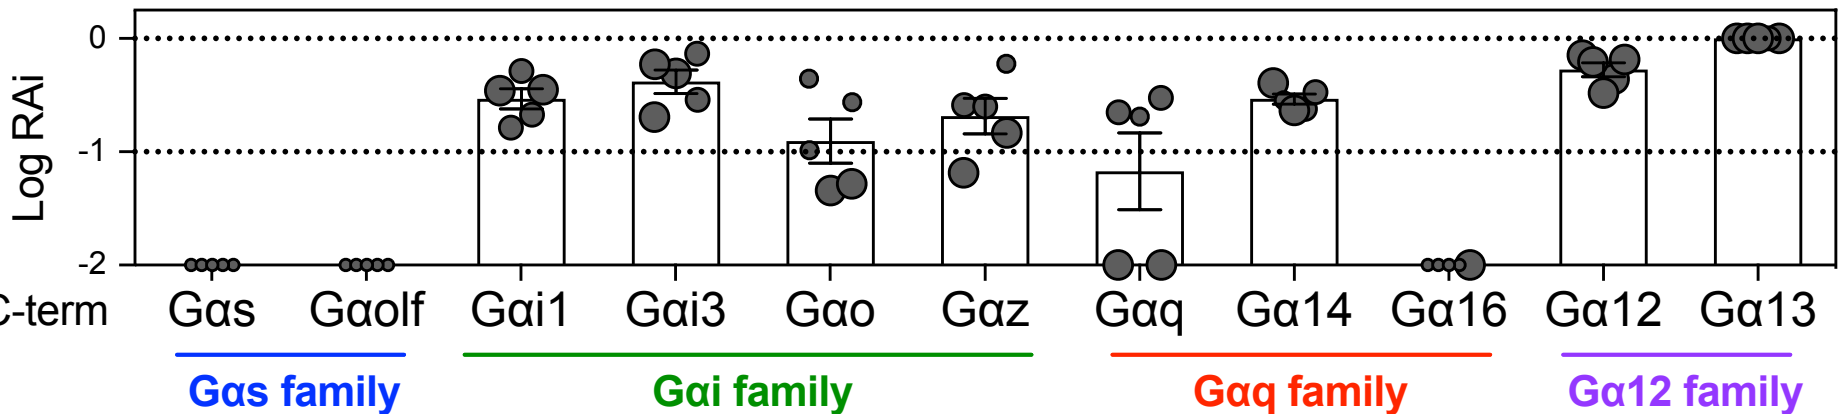

GPCR gene symbol: *P2RY11*

GPCR name: P2Y11

Tested ligand: ATP

### C-terminal chimera co-expression

#### Gas family

#### Gai family

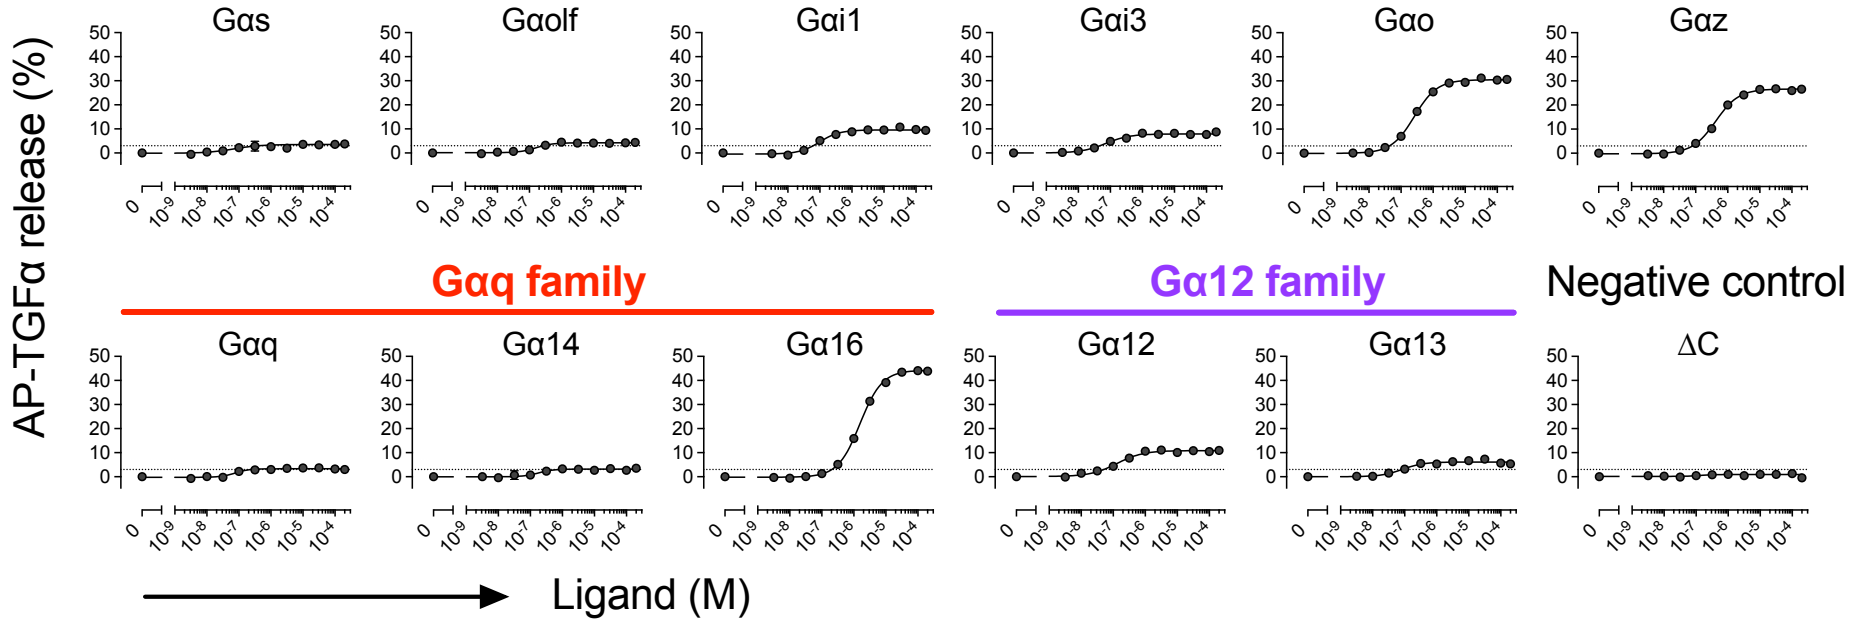

$E_{max}$  (%AP-TGFα release)

● <3%   ● 3-5%   ● 5-10%   ● >10%

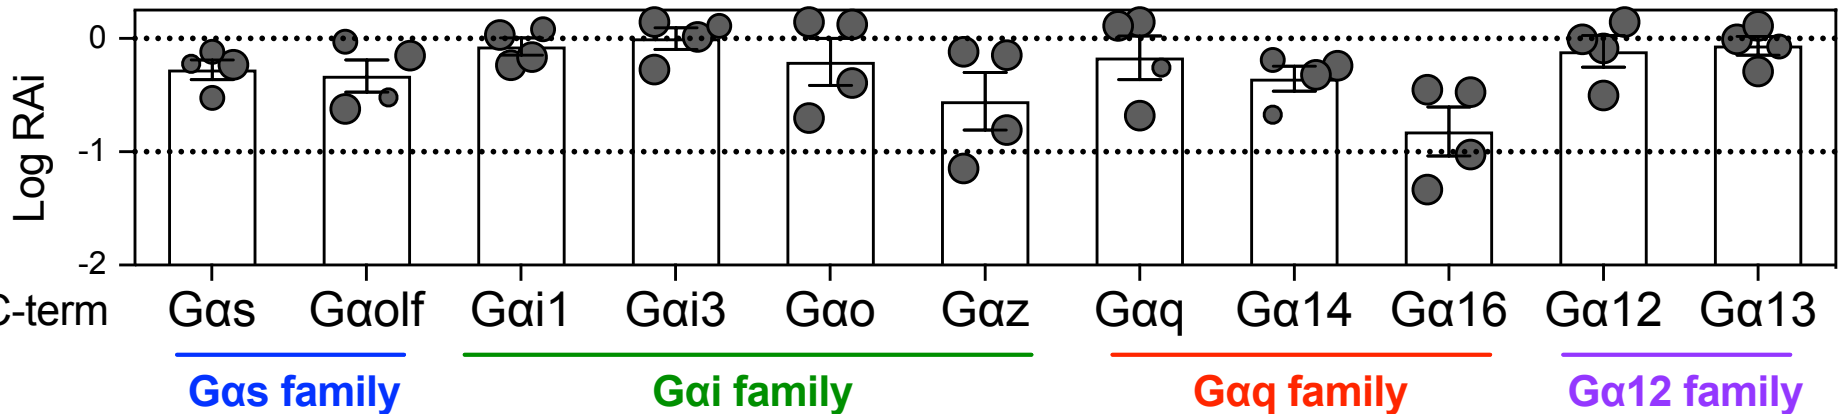

GPCR gene symbol: *P2RY12*

GPCR name: P2Y12

Tested ligand: ADP

### C-terminal chimera co-expression

#### Gas family

#### Gai family

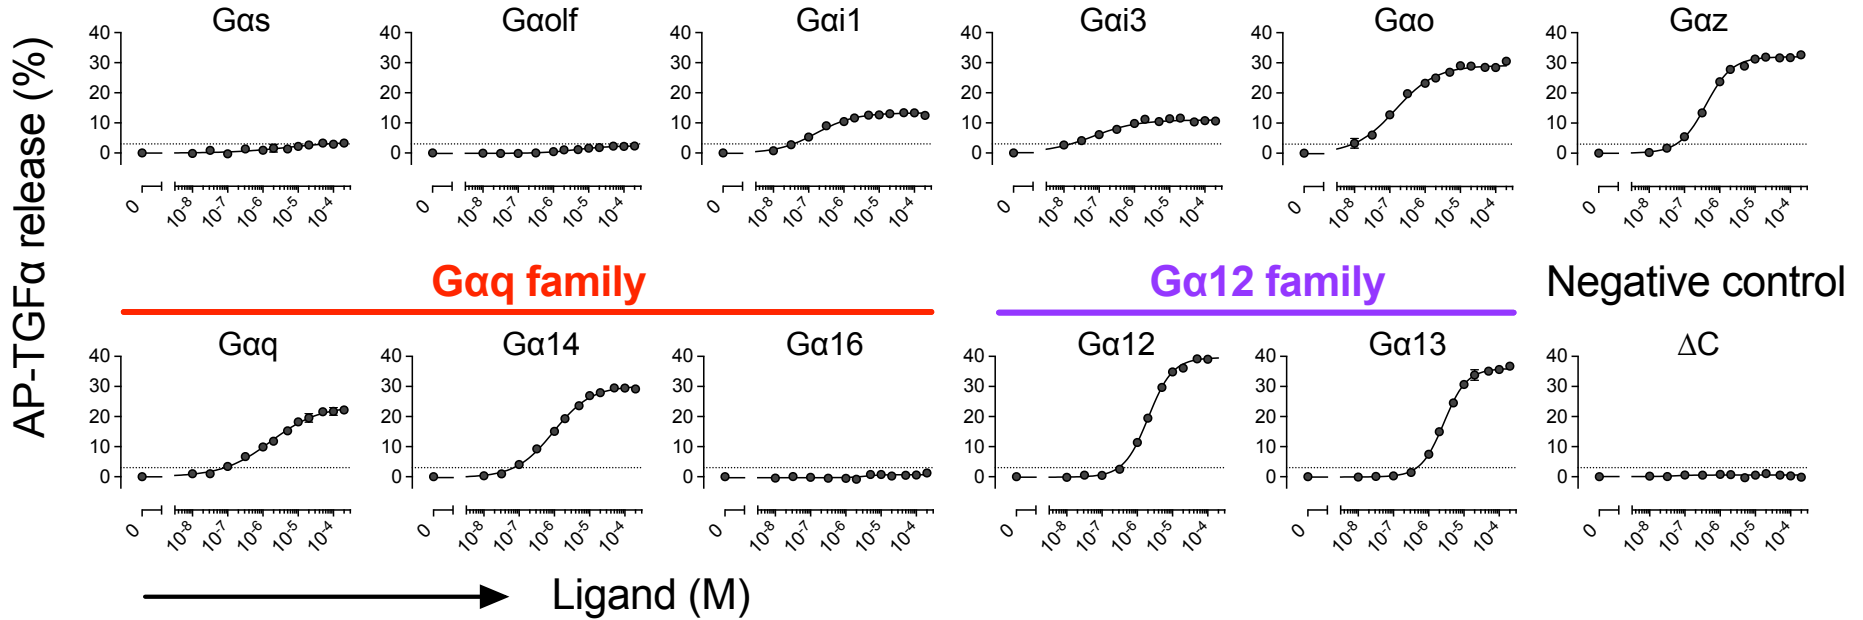

$E_{max}$  (%AP-TGFα release)

● <3%   ● 3-5%   ● 5-10%   ● >10%

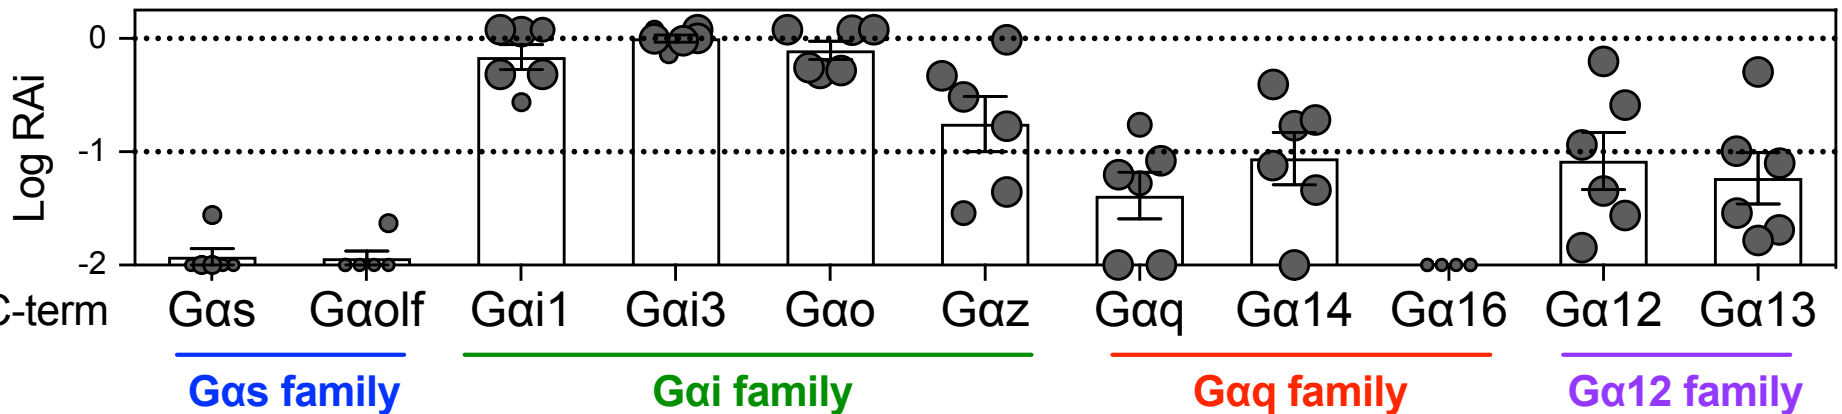

GPCR gene symbol: *P2RY13*

GPCR name: P2Y13

Tested ligand: ADP

### C-terminal chimera co-expression

#### Gas family

#### Gai family

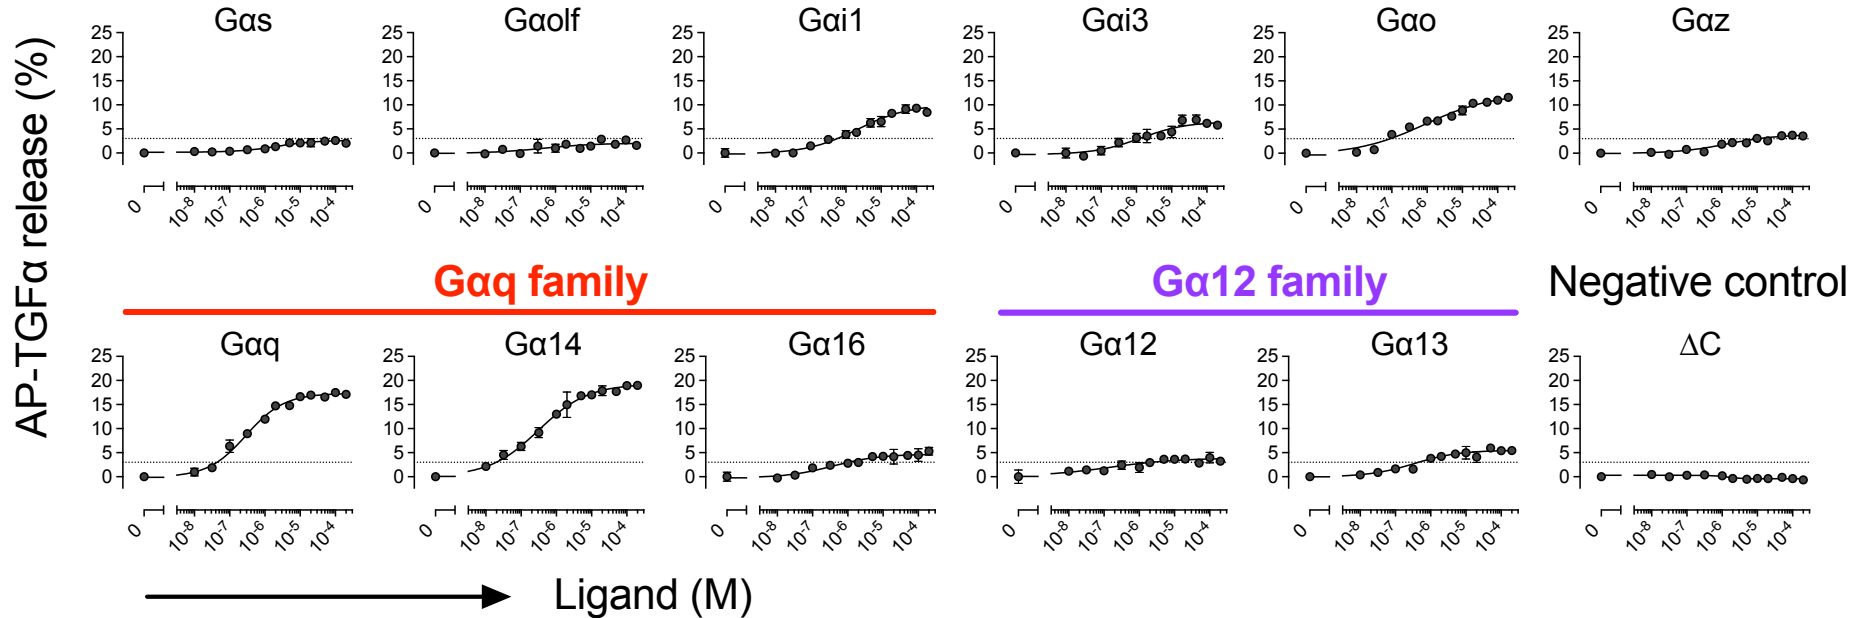

$E_{max}$  (%AP-TGF $\alpha$  release)    ● <3%    ● 3-5%    ● 5-10%    ● >10%

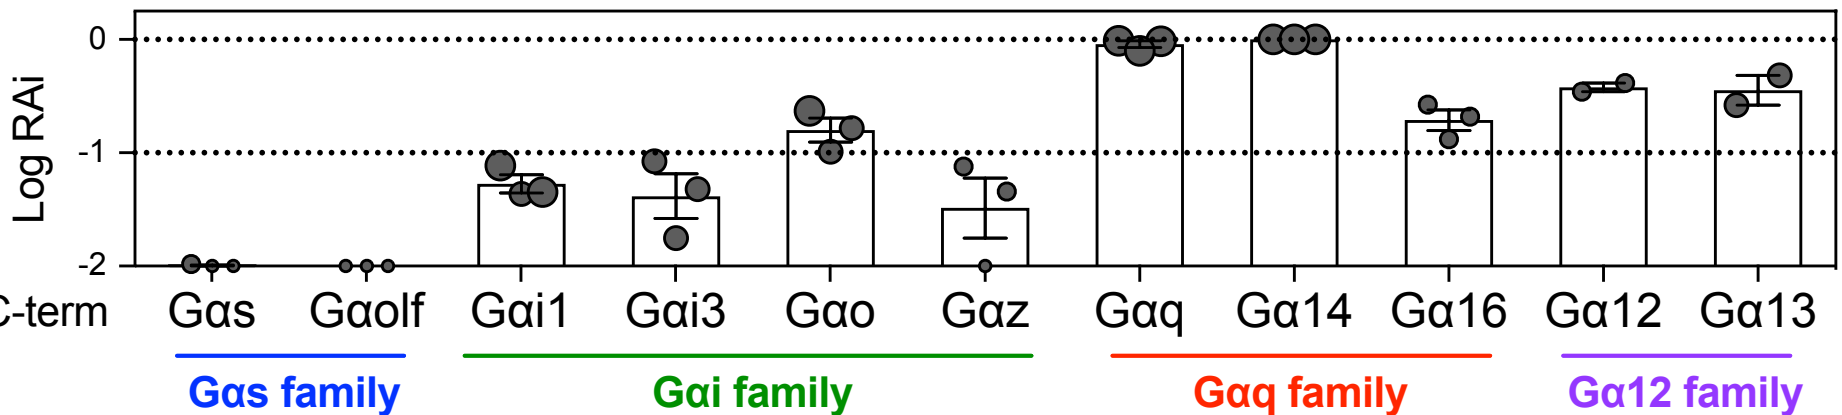

GPCR gene symbol: *P2RY14*

GPCR name: P2Y14

Tested ligand: UDP-Glucose

### C-terminal chimera co-expression

#### Gas family

#### Gai family

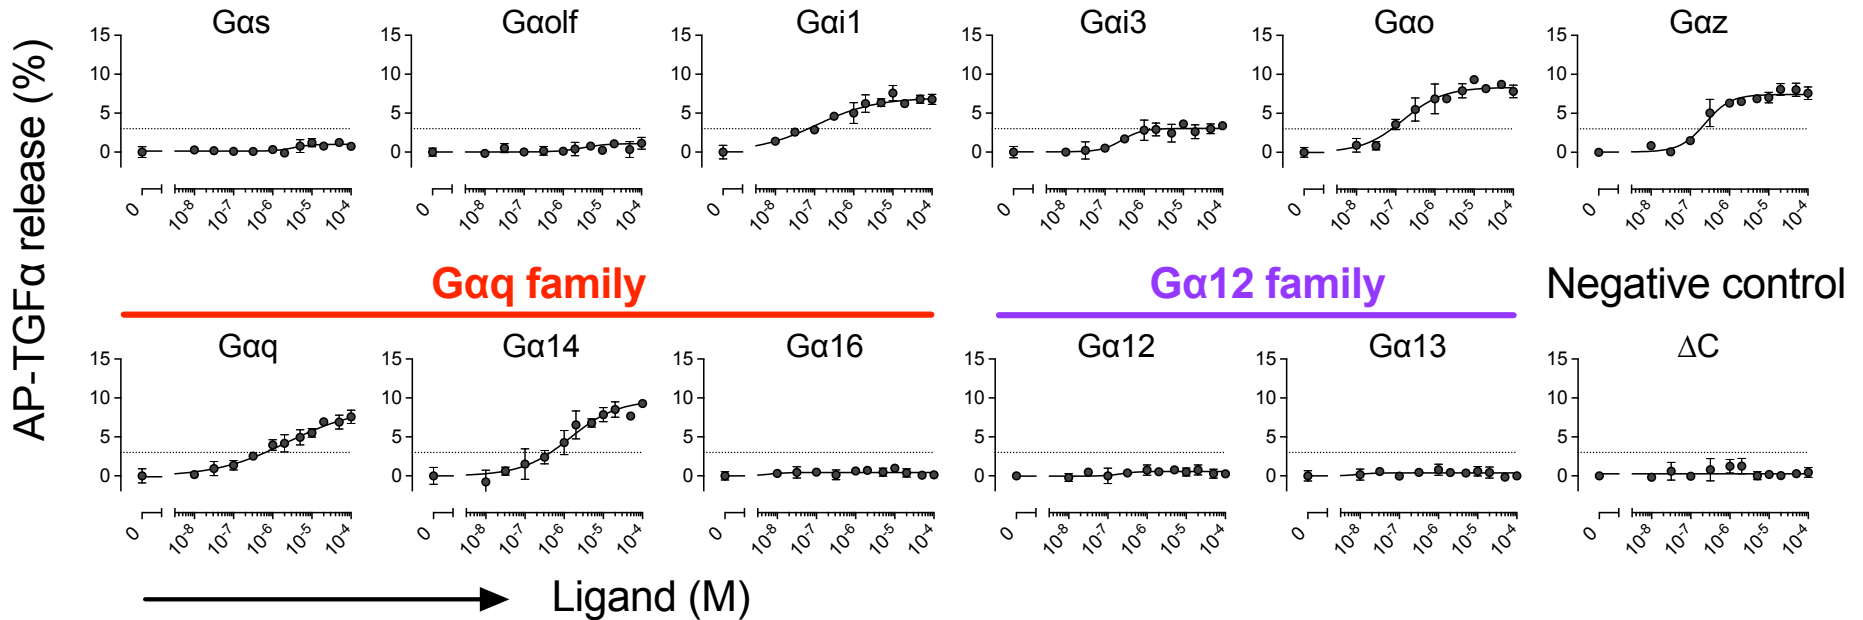

Ligand (M)

$E_{max}$  (%AP-TGFα release)

● <3%   ● 3-5%   ● 5-10%   ● >10%

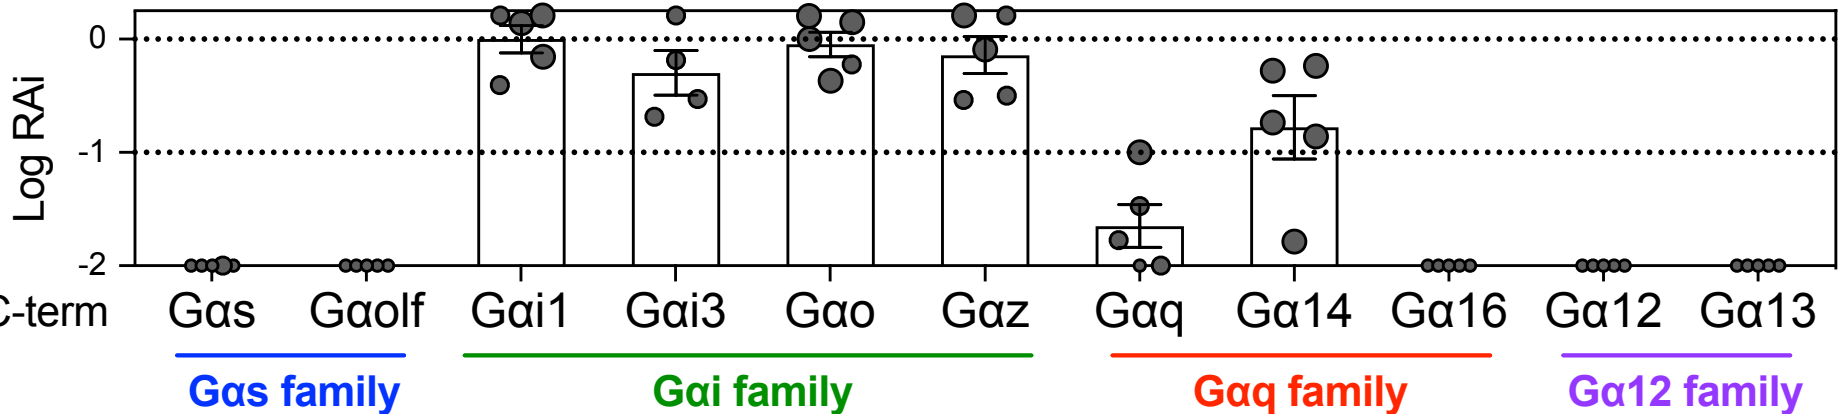



GPCR gene symbol: *P2RY2*

GPCR name: P2Y2

Tested ligand: ATP

### C-terminal chimera co-expression

#### Gas family

#### Gai family

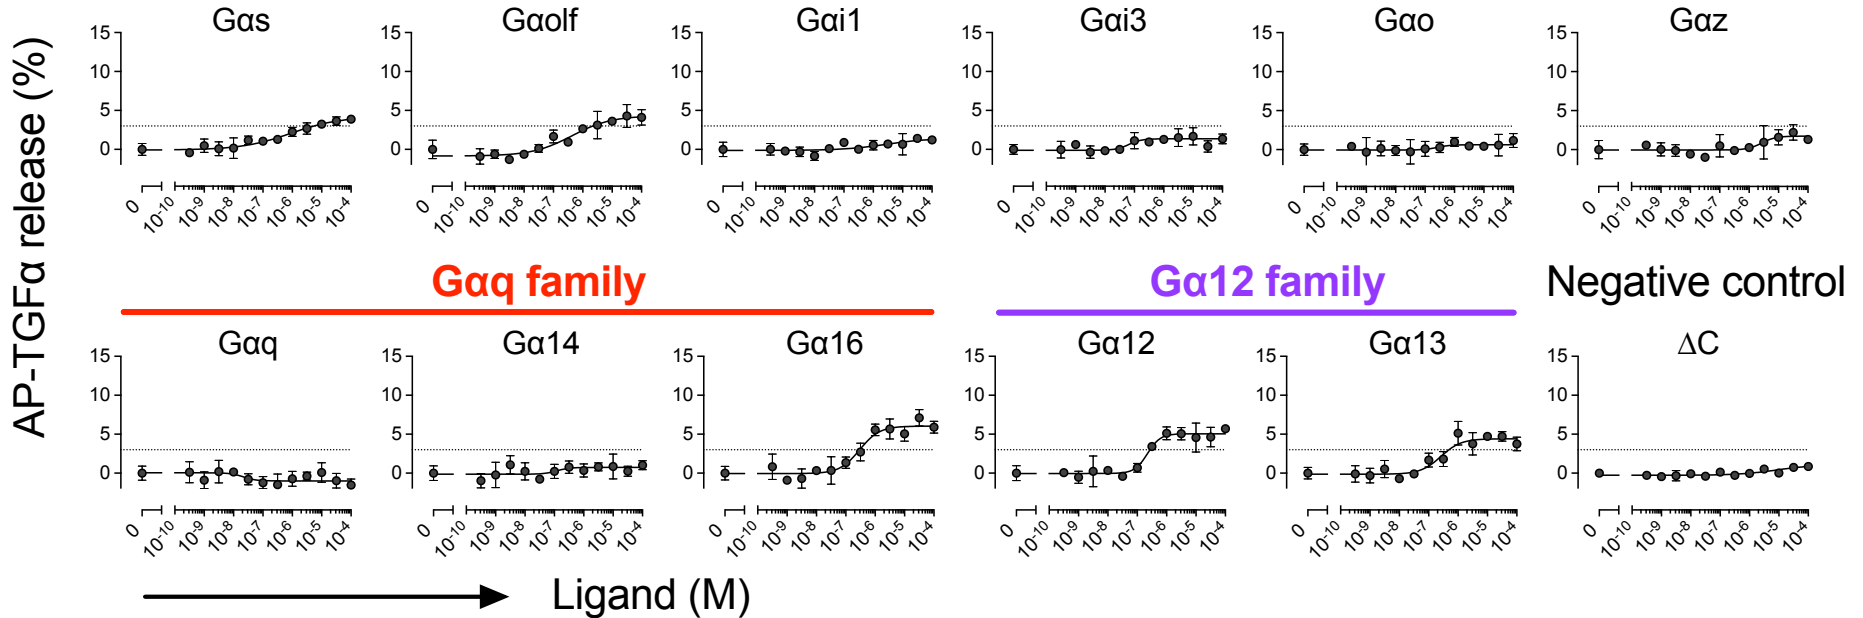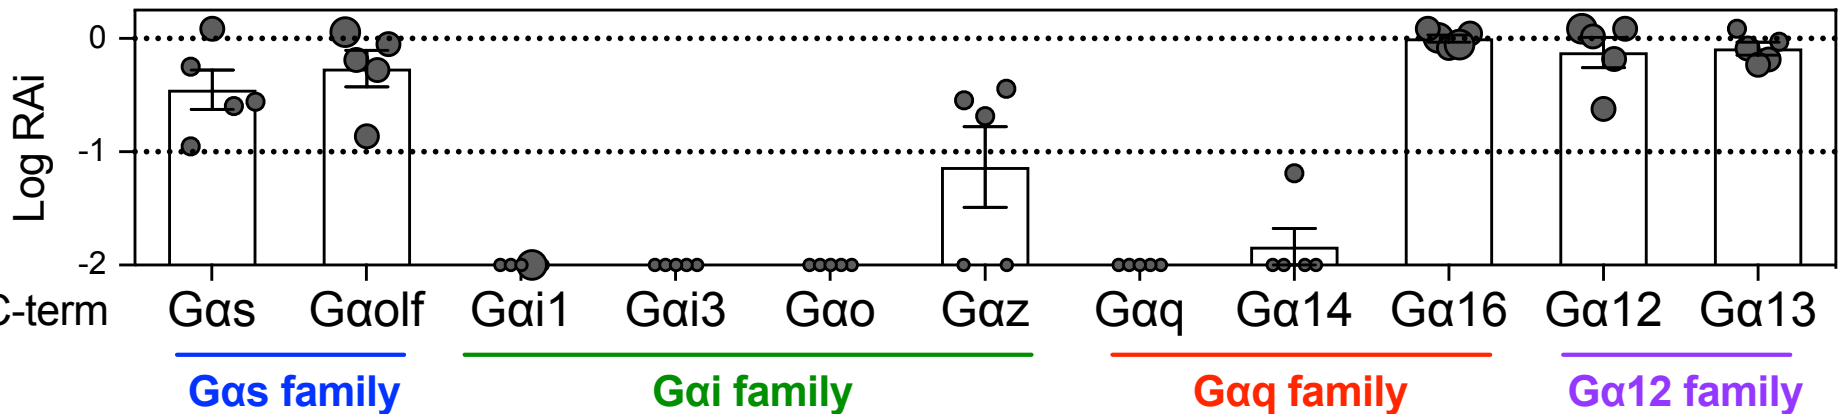

GPCR gene symbol: *P2RY4*

GPCR name: P2Y4

Tested ligand: UTP

### C-terminal chimera co-expression

#### Gas family

#### Gai family

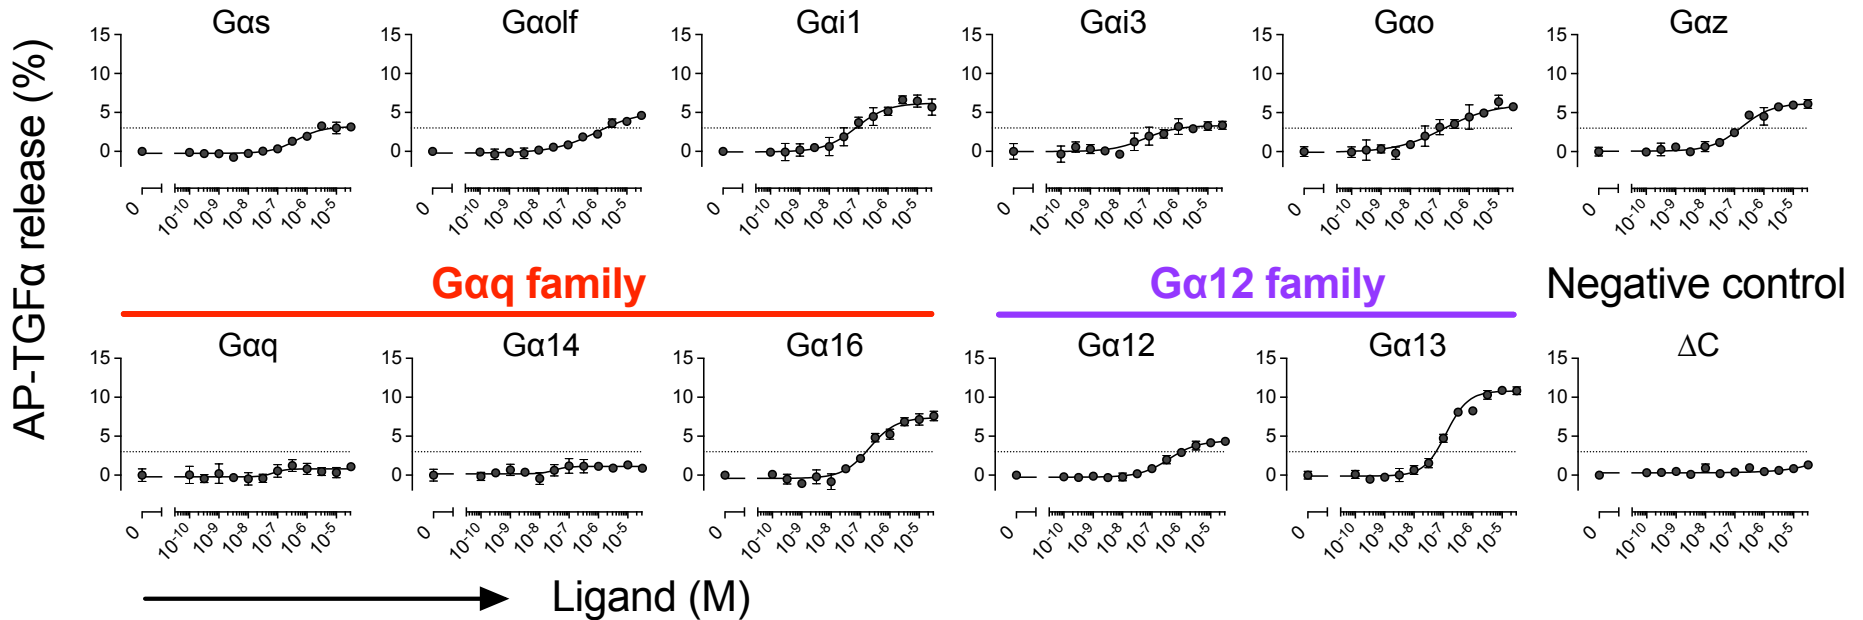

$E_{max}$  (%AP-TGFα release)    ● <3%    ● 3-5%    ● 5-10%    ● >10%

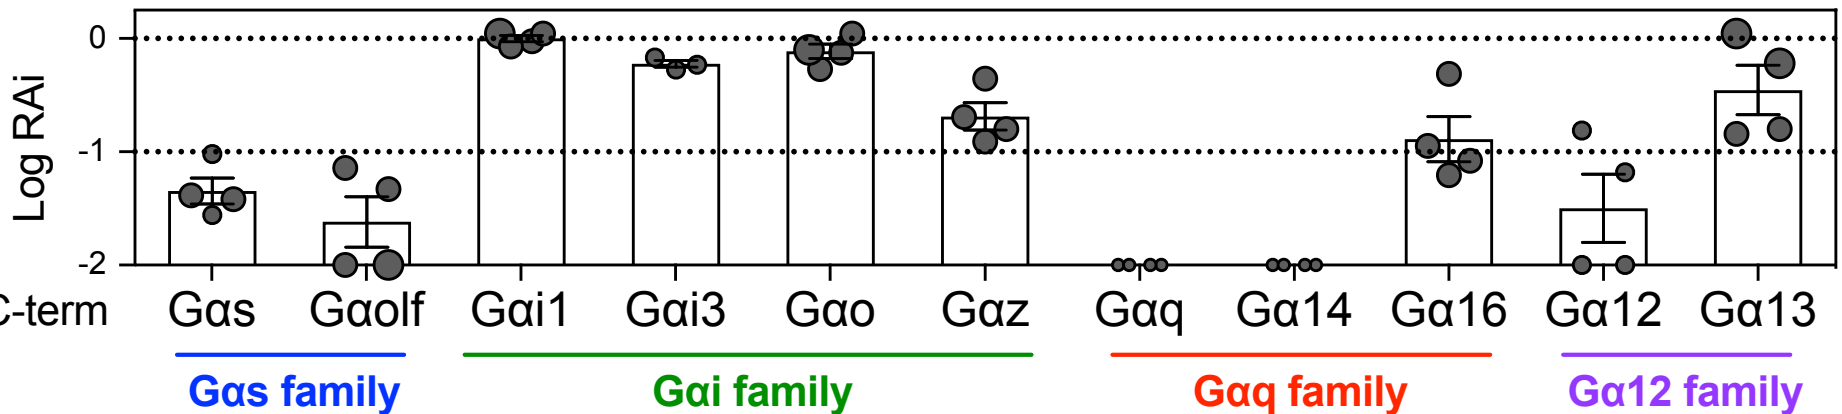

GPCR gene symbol: *P2RY6*

GPCR name: P2Y6

Tested ligand: UDP

### C-terminal chimera co-expression

#### Gas family

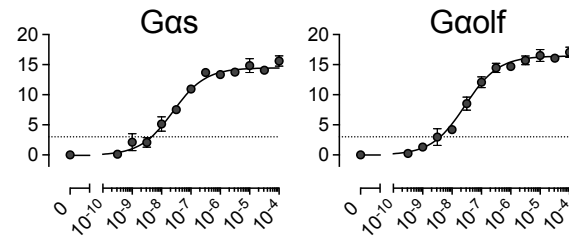

#### Gai family

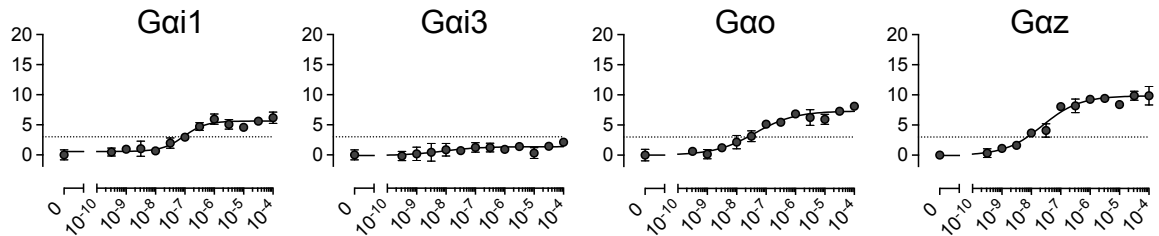

#### Gaq family

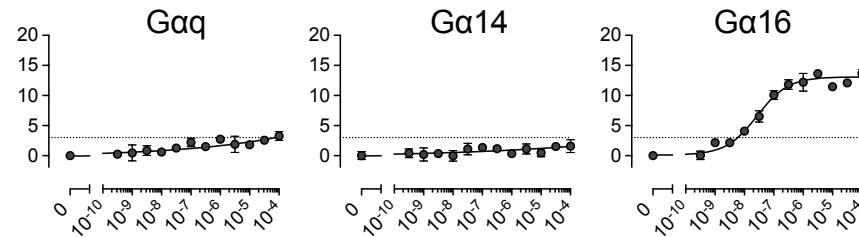

#### G $\alpha$ 12 family

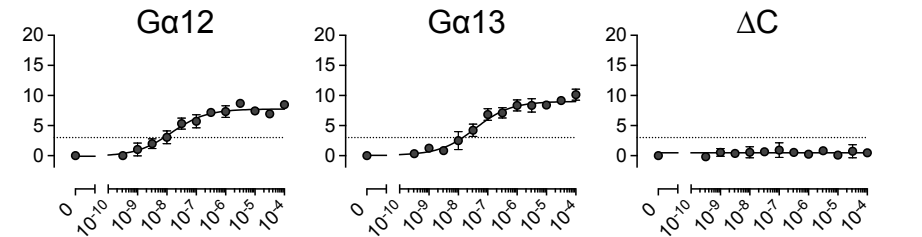

AP-TGF $\alpha$  release (%)

Ligand (M)

$E_{max}$  (%AP-TGF $\alpha$  release)

● <3%   ● 3-5%   ● 5-10%   ● >10%

Log RAI

C-term   Gas   Gaolf   Gai1   Gai3   Gao   Gaz   Gaq   G $\alpha$ 14   G $\alpha$ 16   G $\alpha$ 12   G $\alpha$ 13

Gas family

Gai family

Gaq family

G $\alpha$ 12 family

GPCR gene symbol: *PRLHR*

GPCR name: PRLHR

Tested ligand: Prolactin-releasing peptide-20 ( PrRP-20)

### C-terminal chimera co-expression

#### Gas family

#### Gai family

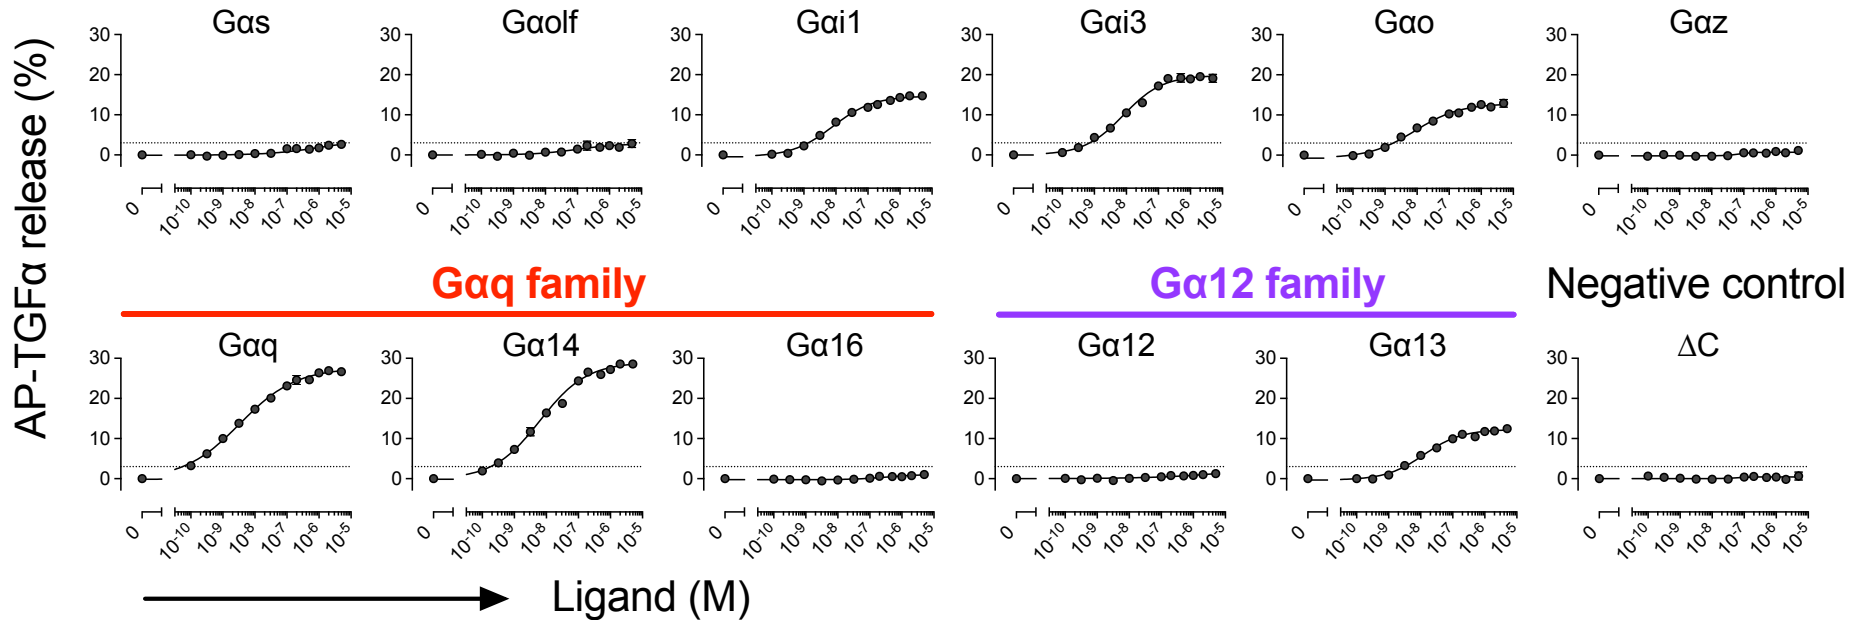

$E_{max}$  (%AP-TGFα release)    ● <3%    ● 3-5%    ● 5-10%    ● >10%

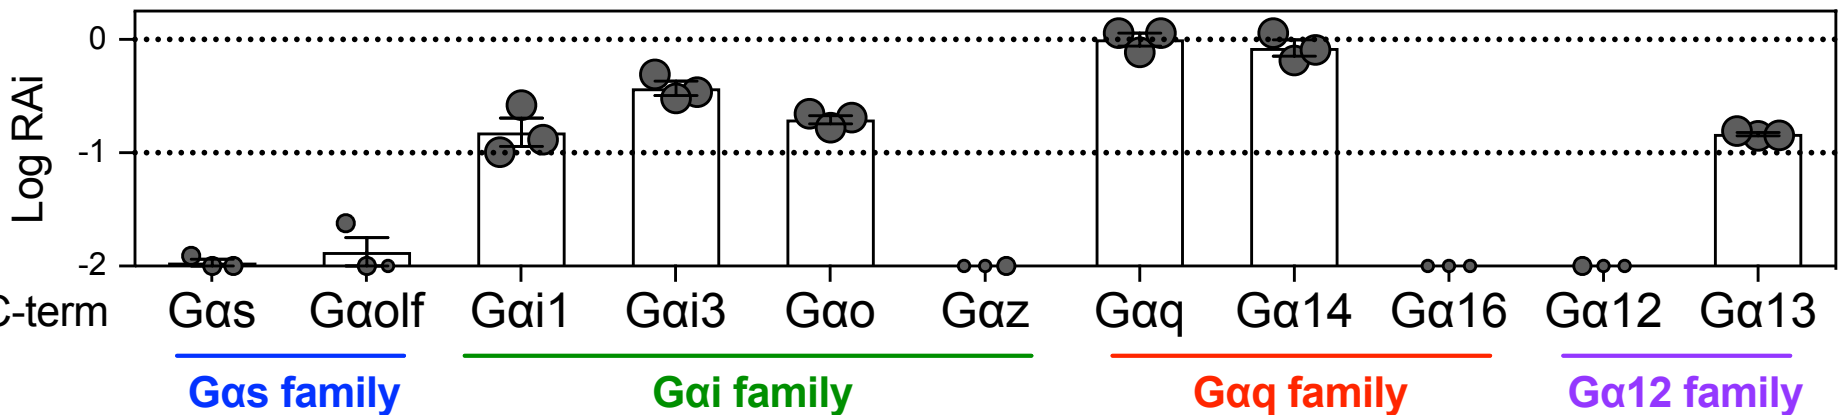

GPCR gene symbol: *PTAFR*

GPCR name: PAFR

Tested ligand: Platelet-activating factor (PAF)

### C-terminal chimera co-expression

#### Gas family

#### Gai family

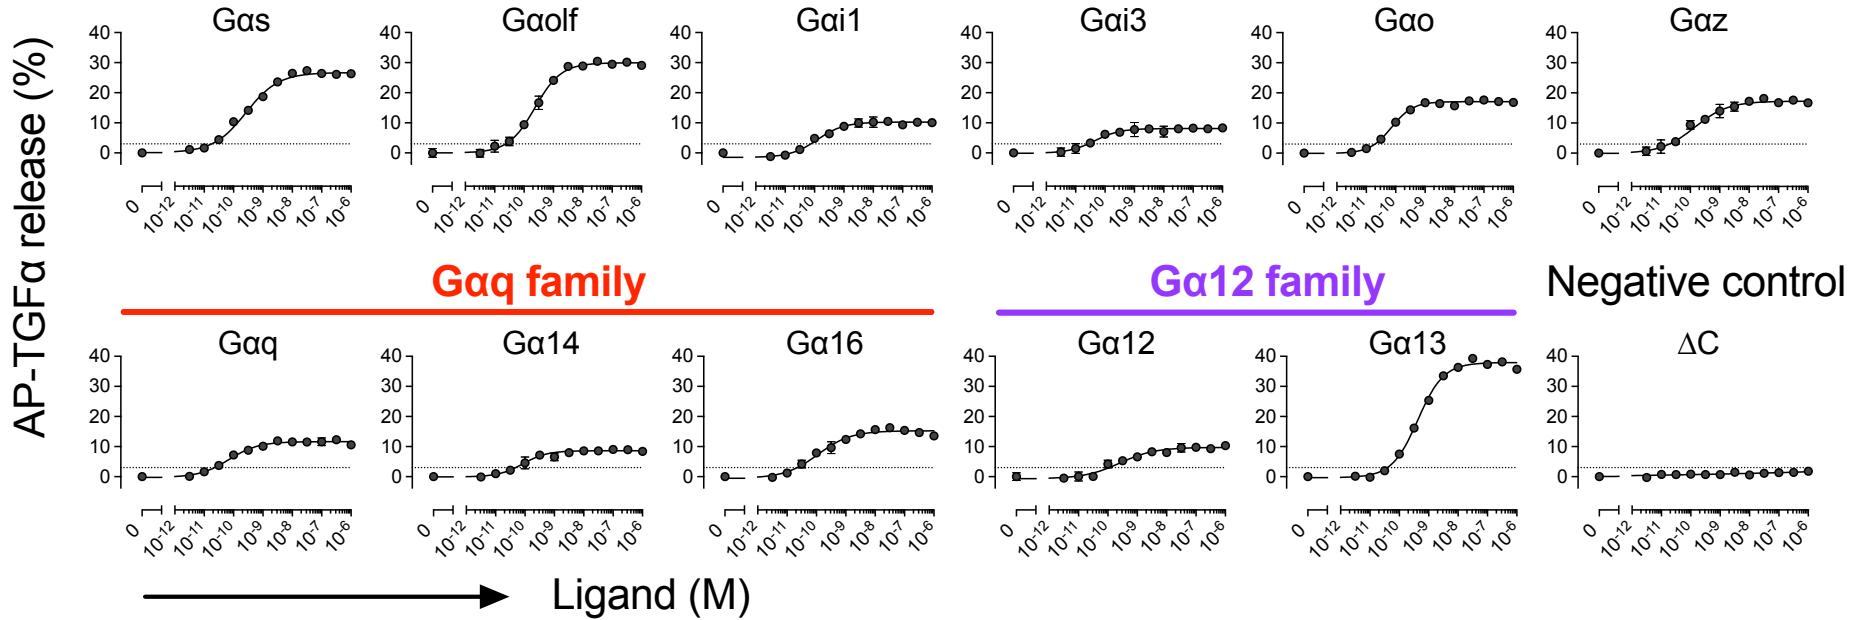

$E_{max}$  (%AP-TGFα release)

● <3%   ● 3-5%   ● 5-10%   ● >10%

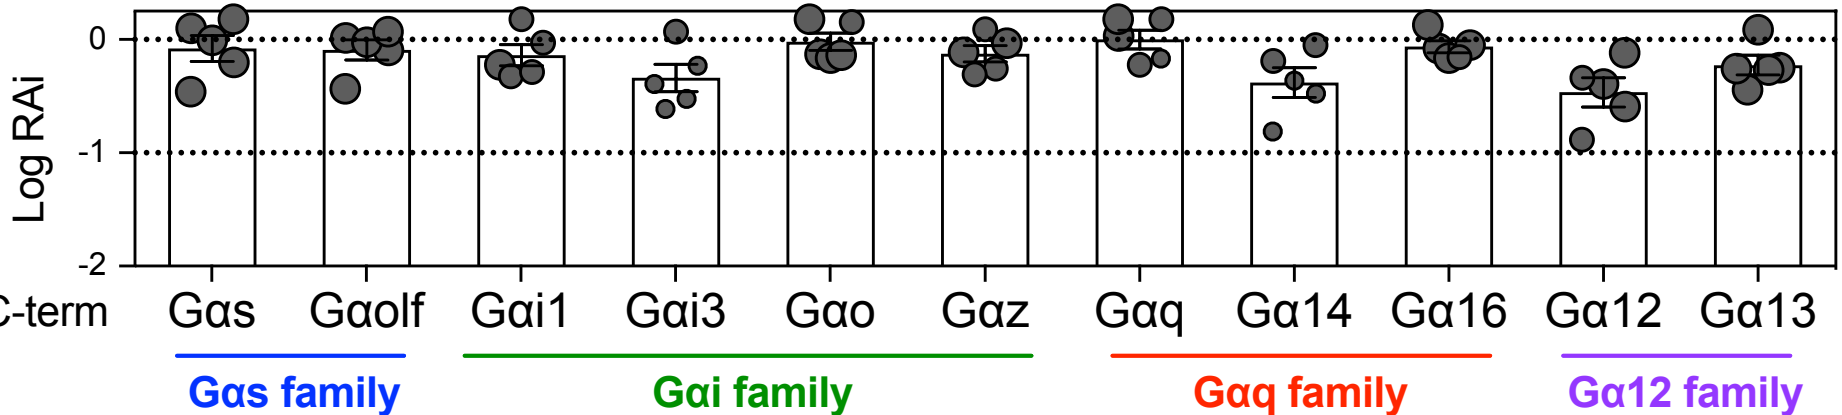

GPCR gene symbol: *PTGDR*  
 GPCR name: DP  
 Tested ligand: Prostaglandin D2

### C-terminal chimera co-expression

#### Gas family

#### Gai family

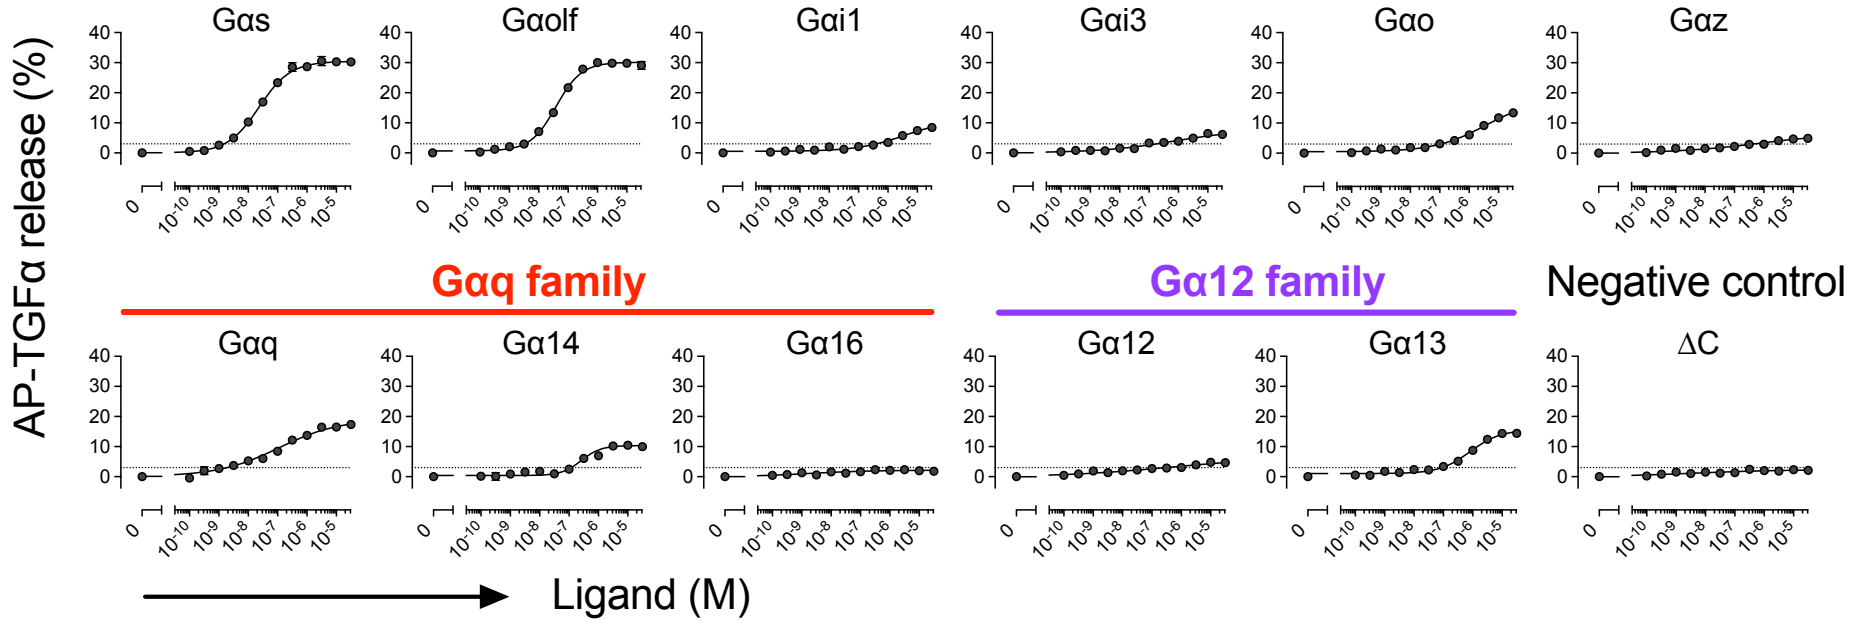

$E_{max}$  (%AP-TGF $\alpha$  release)    ● <3%    ● 3-5%    ● 5-10%    ● >10%

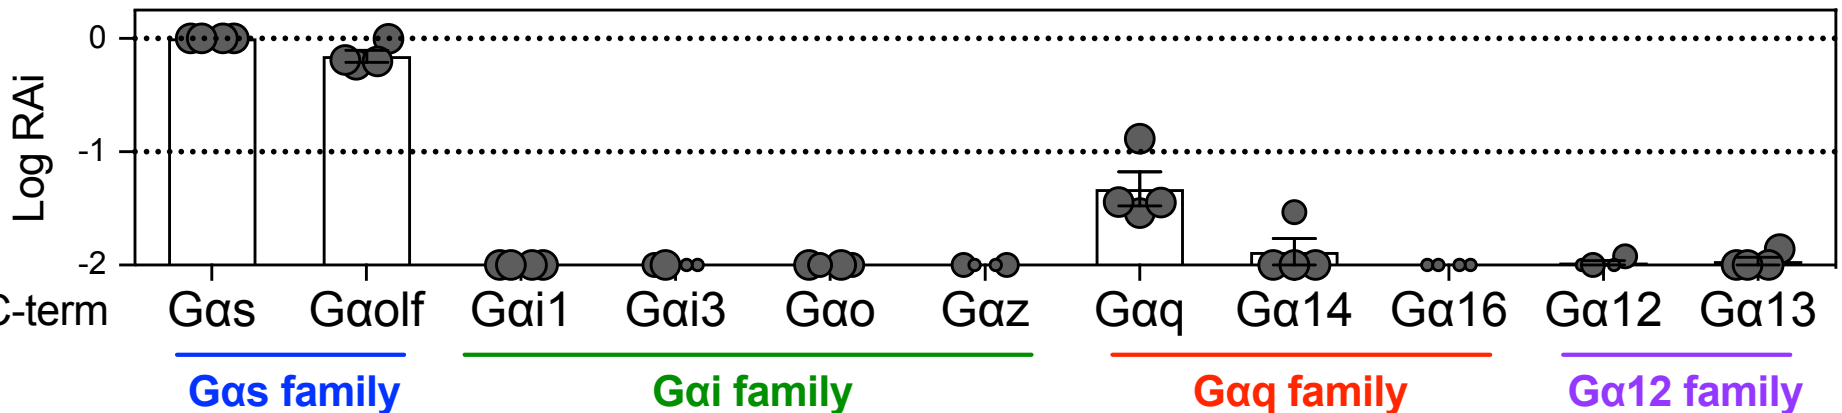

GPCR gene symbol: *PTGER1*

GPCR name: EP1

Tested ligand: Prostaglandin E2

### C-terminal chimera co-expression

#### Gas family

#### Gai family

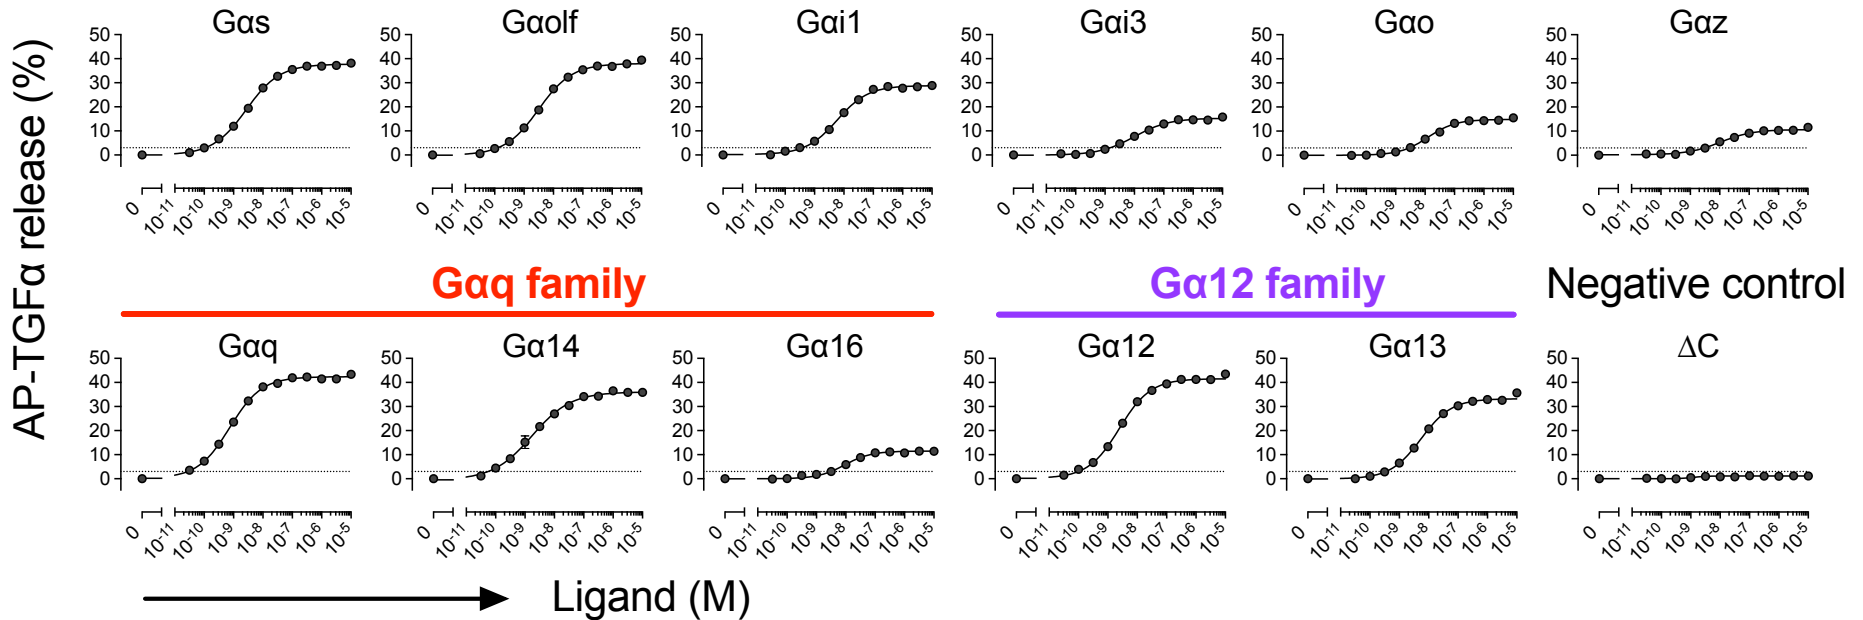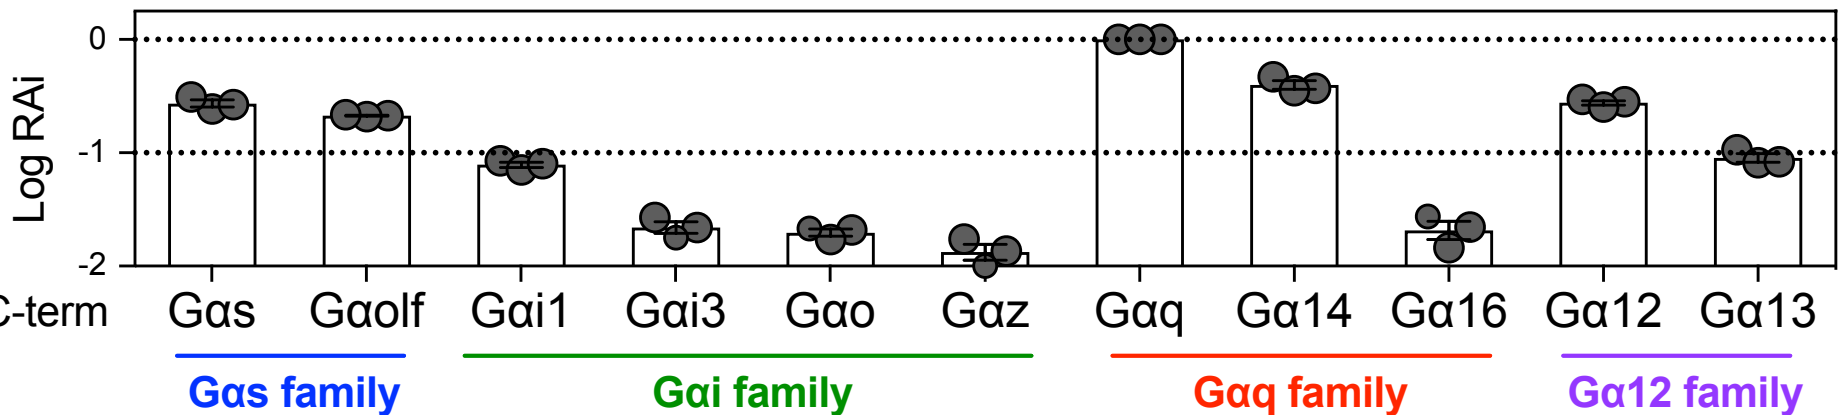

GPCR gene symbol: *PTGER1*

GPCR name: EP1

Tested ligand: Prostaglandin E2

### C-terminal chimera co-expression

#### Gas family

#### Gai family

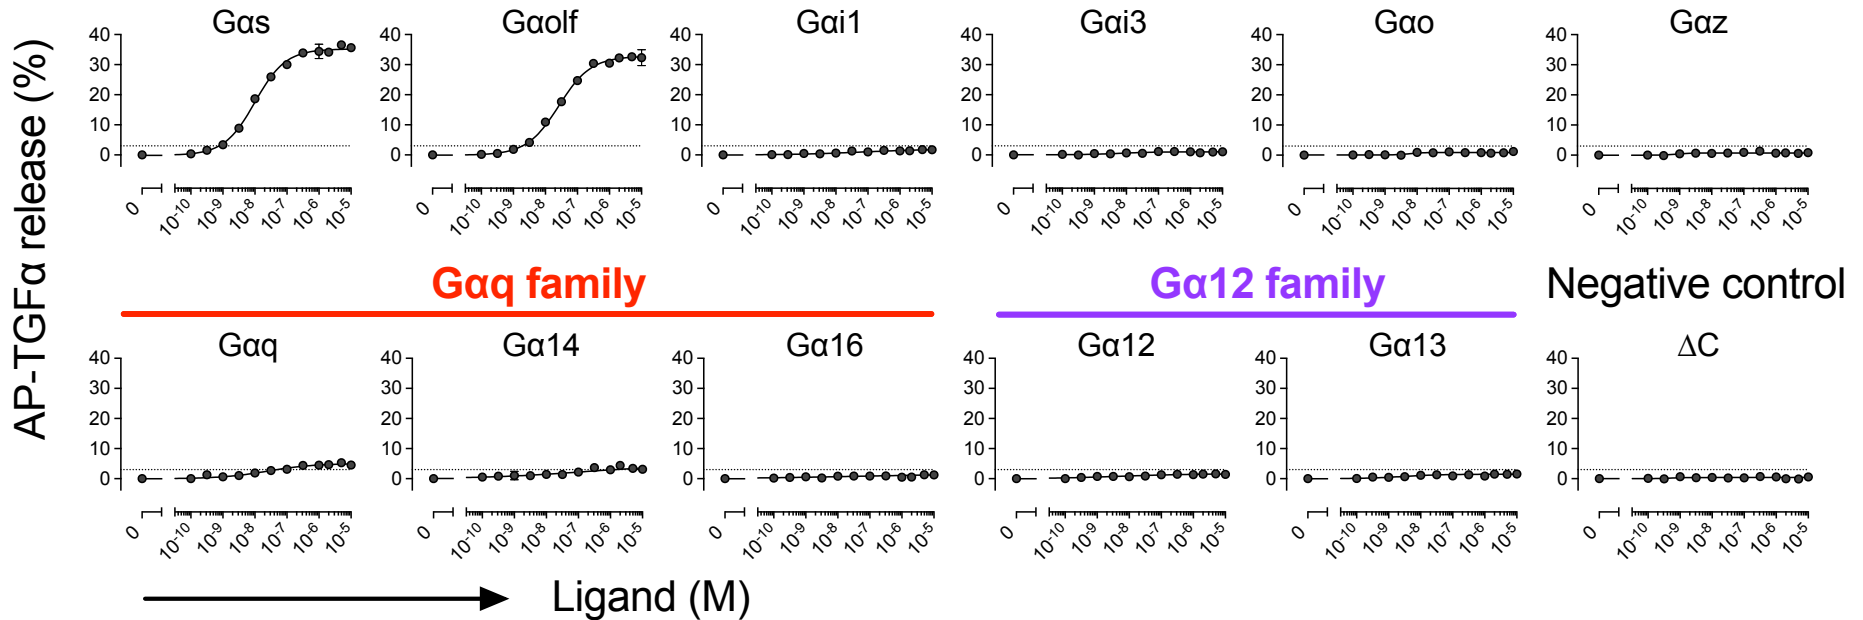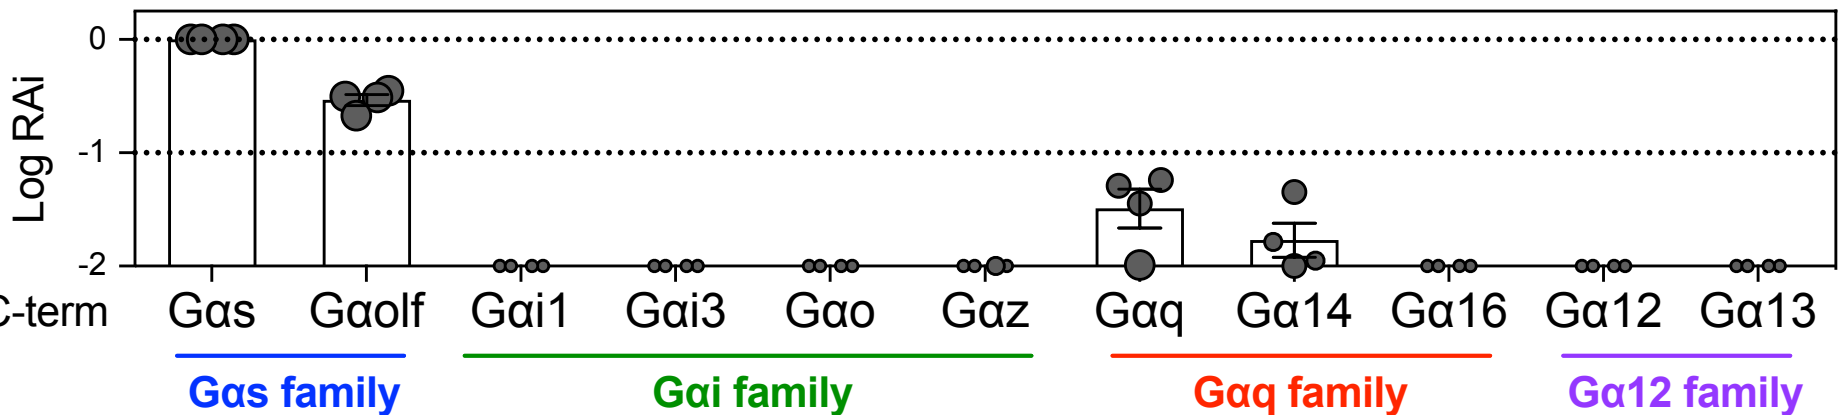



GPCR gene symbol: *PTGER3*

GPCR name: EP3

Tested ligand: Prostaglandin E2

### C-terminal chimera co-expression

#### Gas family

#### Gai family

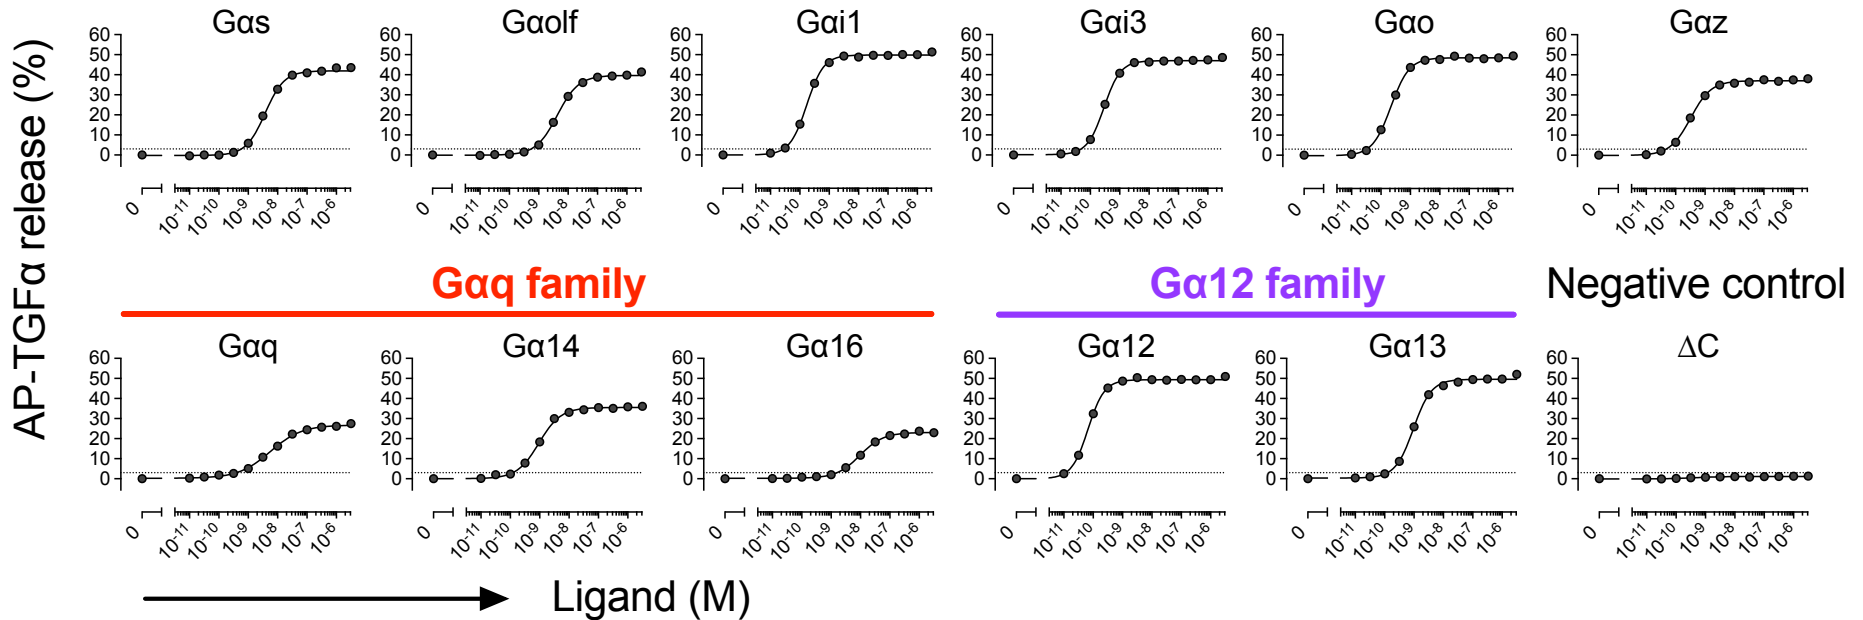

$E_{max}$  (%AP-TGF $\alpha$  release)    ● <3%    ● 3-5%    ● 5-10%    ● >10%

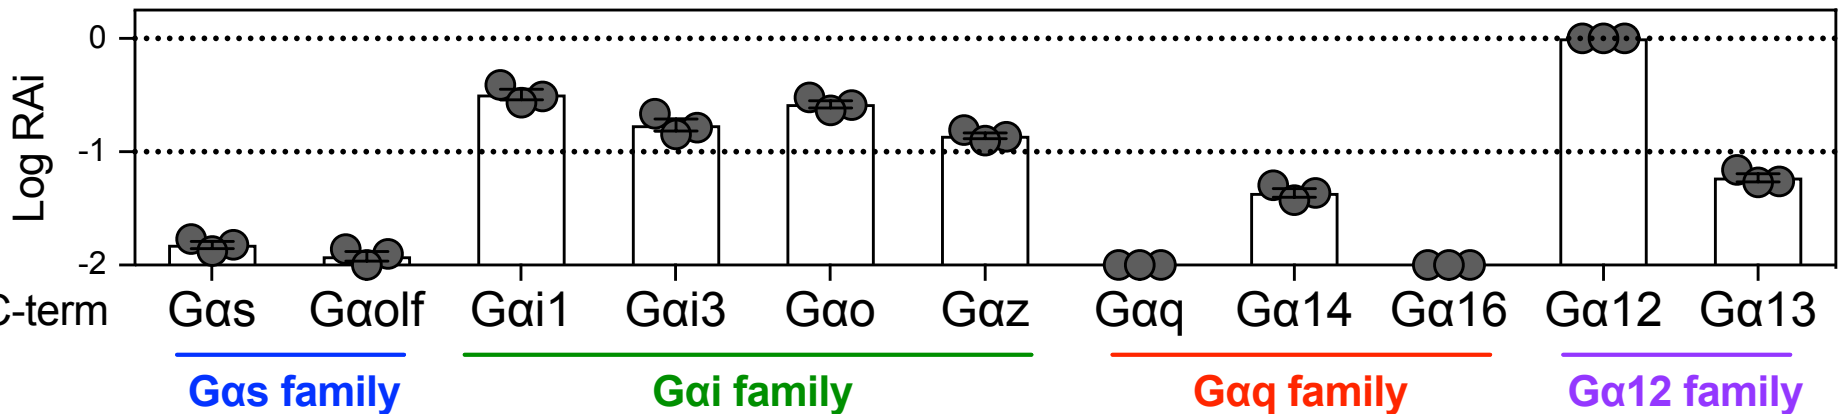

GPCR gene symbol: *PTGER4*

GPCR name: EP4

Tested ligand: Prostaglandin E2

### C-terminal chimera co-expression

#### Gas family

#### Gai family

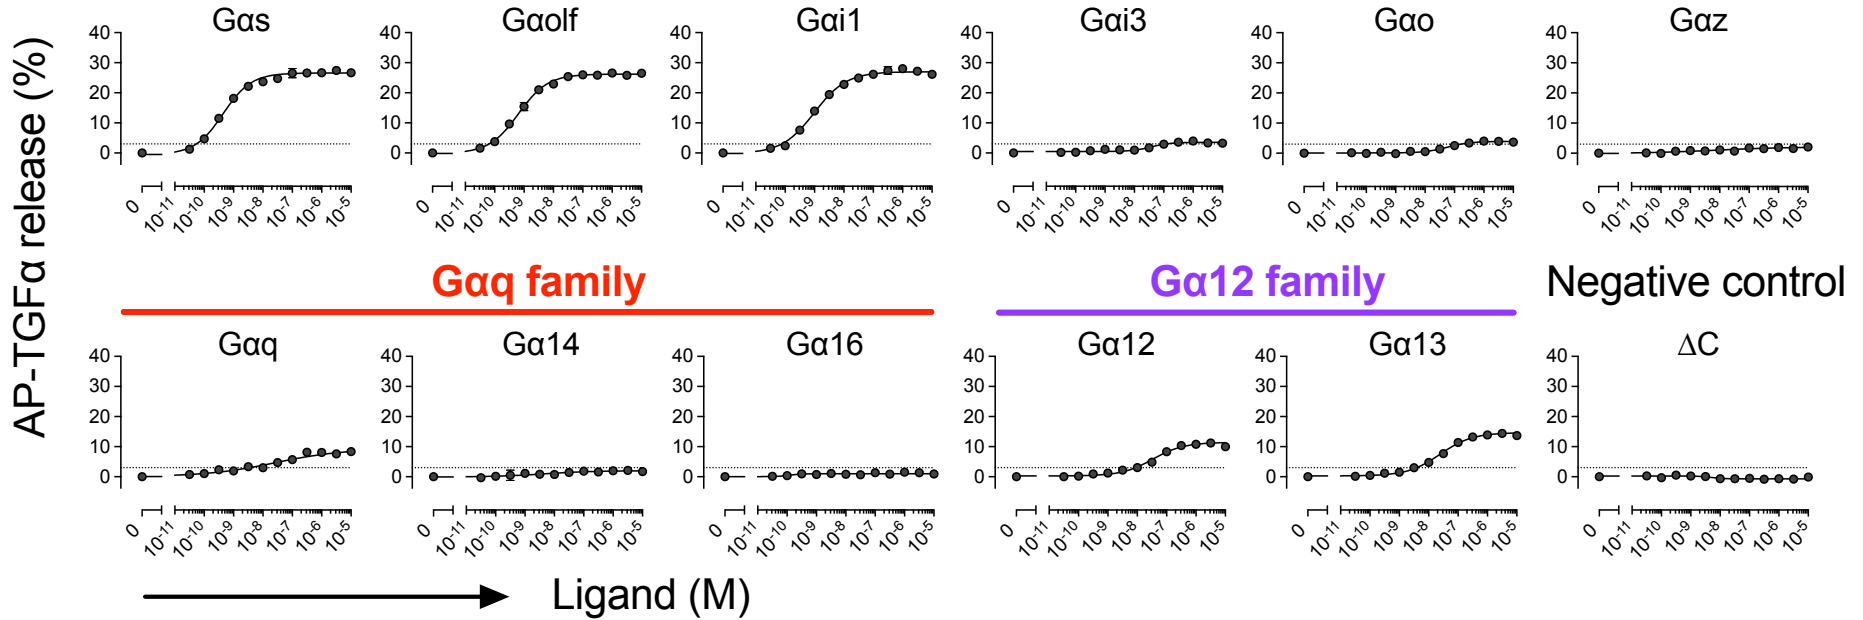

$E_{max}$  (%AP-TGF $\alpha$  release)    • <3%    • 3-5%    • 5-10%    • >10%

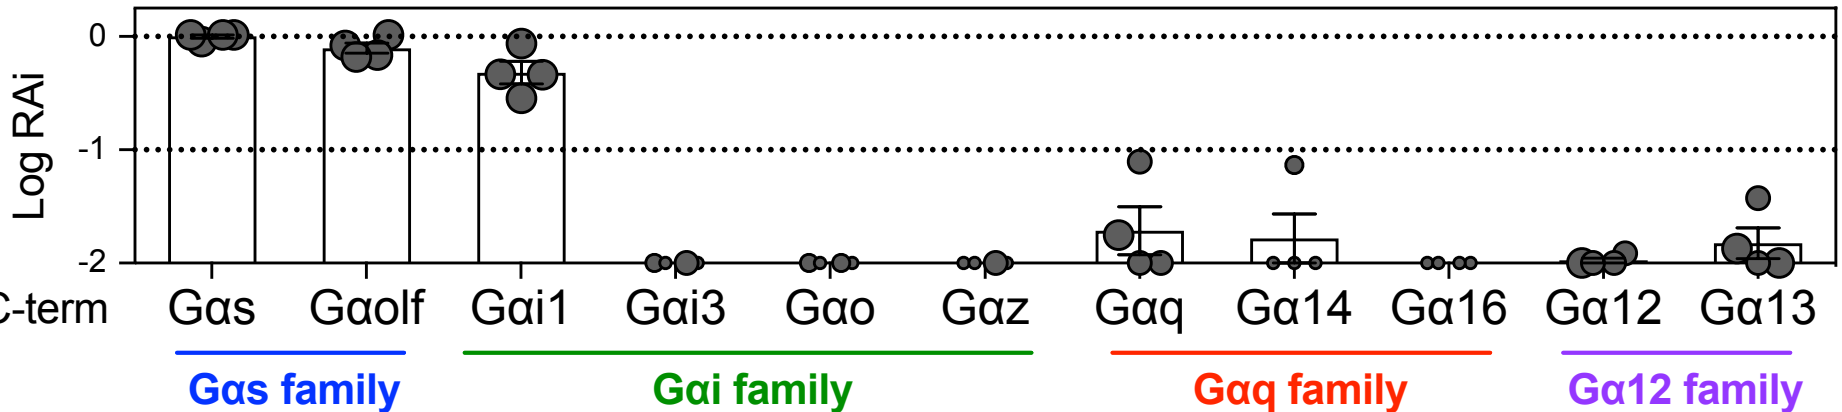

GPCR gene symbol: *PTGFR*

GPCR name: FP

Tested ligand: Prostaglandin F2 $\alpha$

### C-terminal chimera co-expression

#### Gas family

#### Gai family

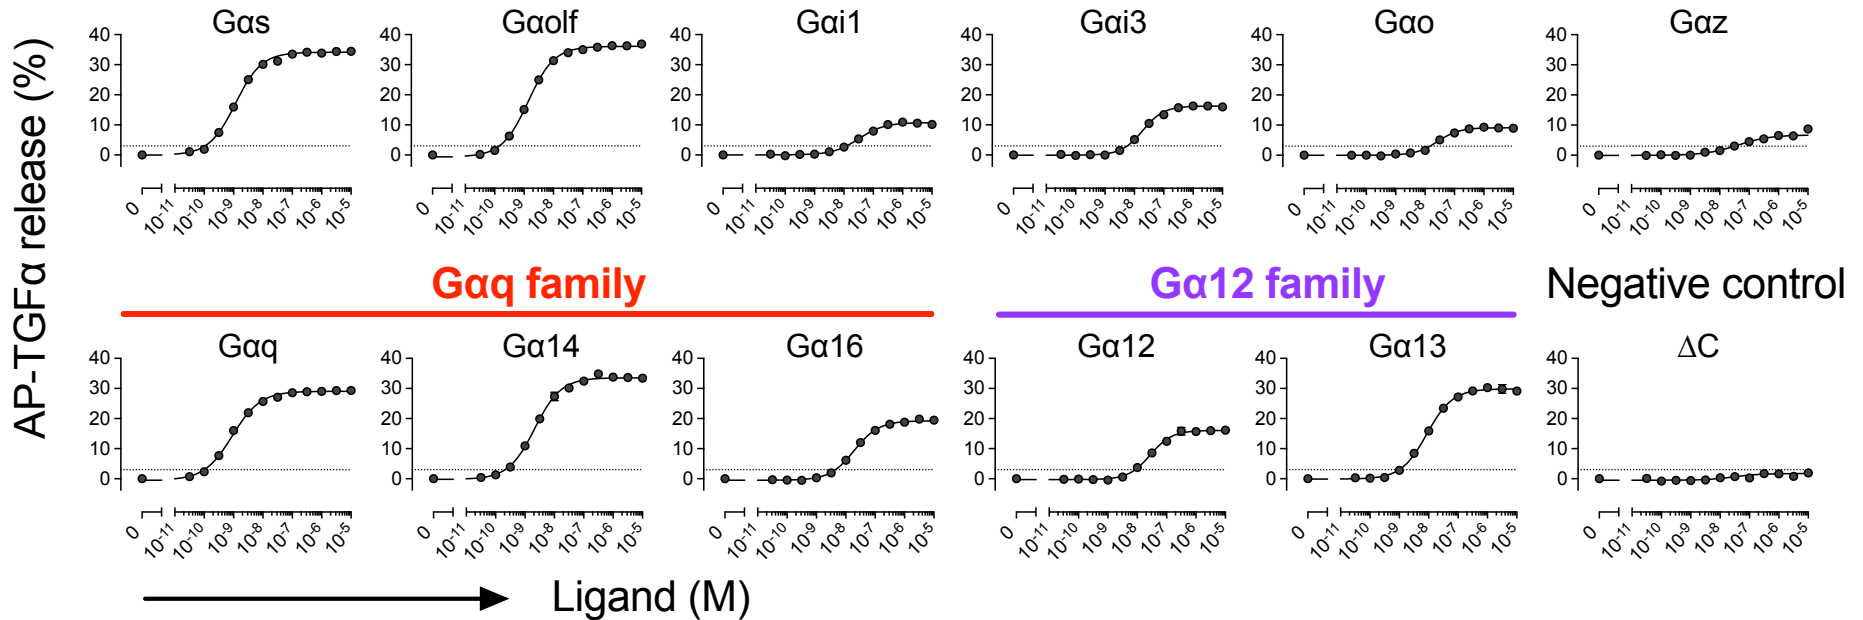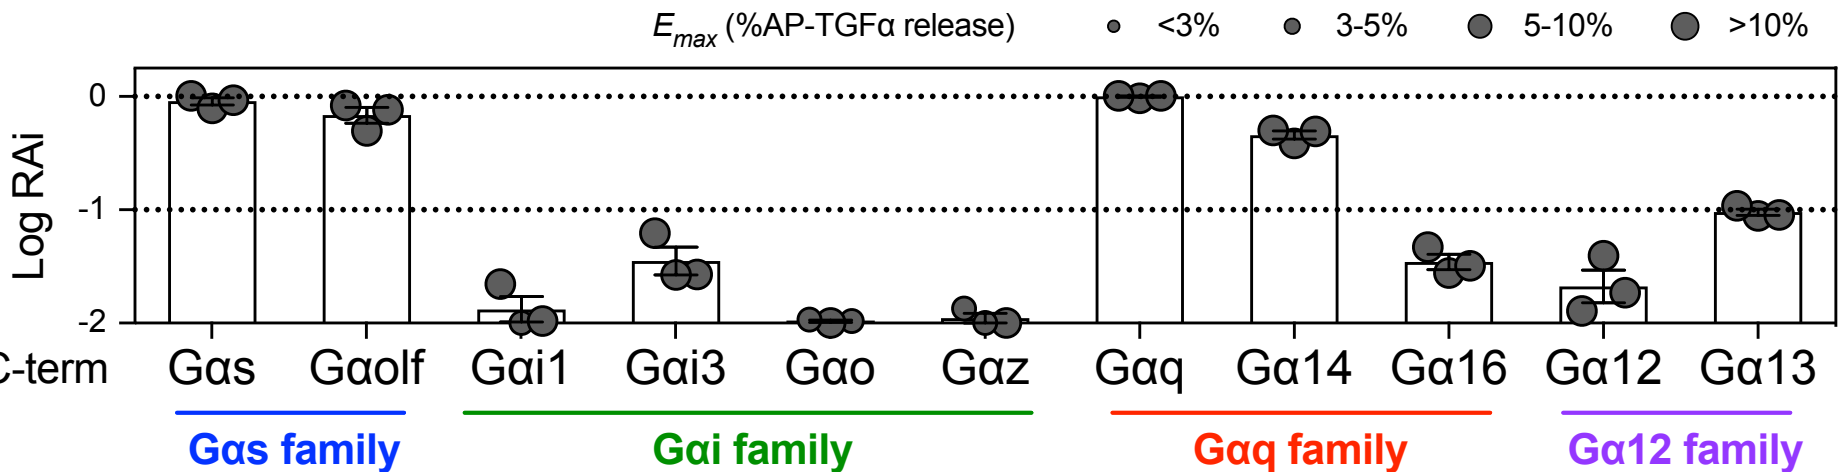

GPCR gene symbol: *PTGIR*

GPCR name: IP

Tested ligand: Iloprost

### C-terminal chimera co-expression

#### Gas family

#### Gai family

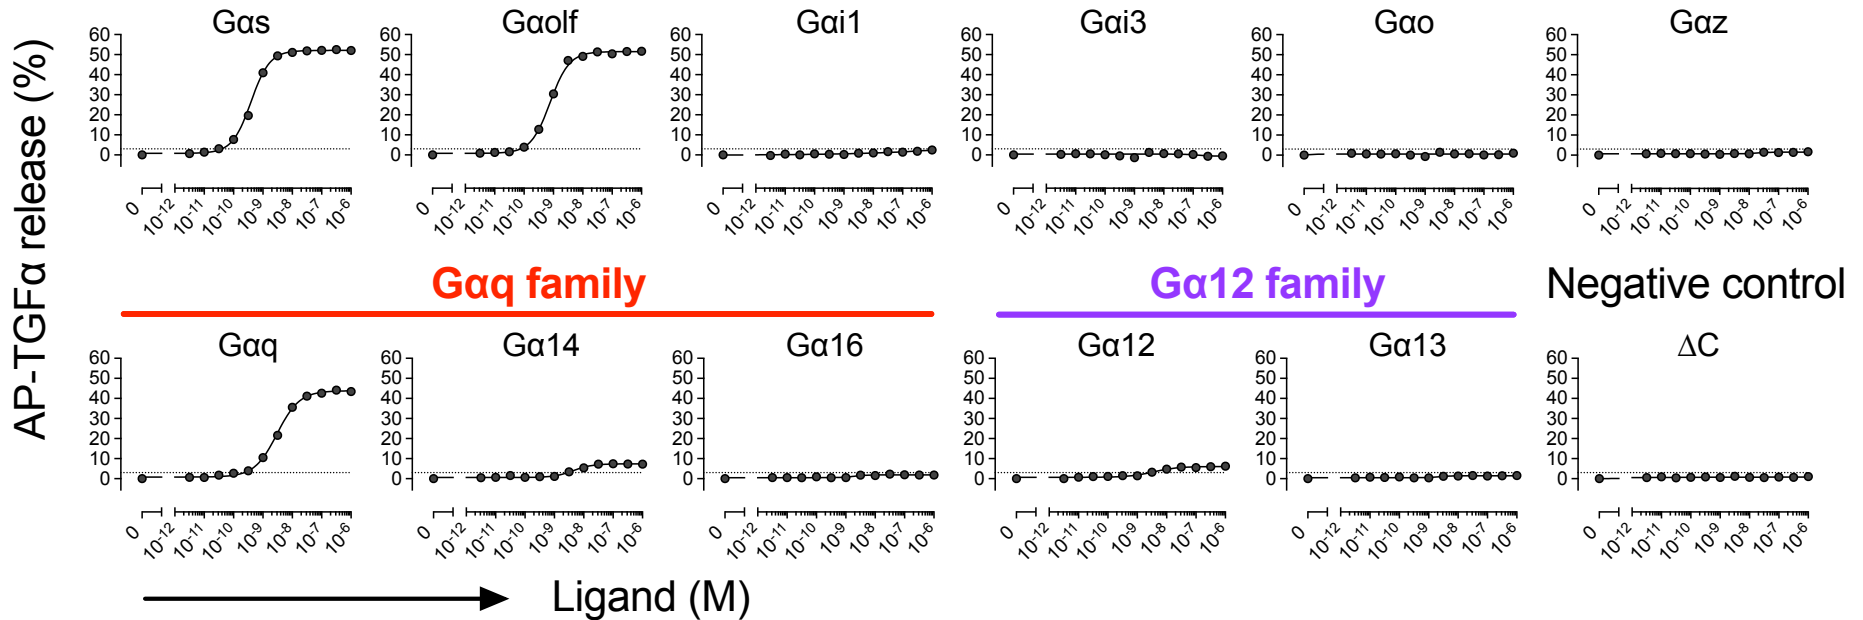

$E_{max}$  (%AP-TGF $\alpha$  release)    ● <3%    ● 3-5%    ● 5-10%    ● >10%

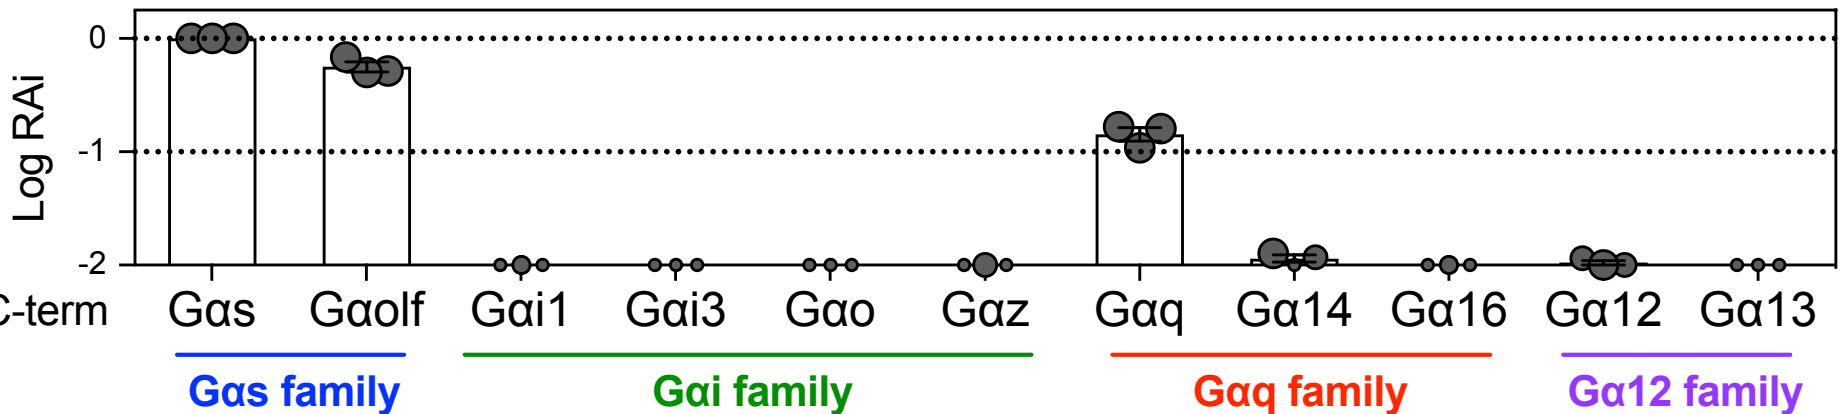

GPCR gene symbol: *PTH1R*

GPCR name: PTH1

Tested ligand: parathyroid hormone (PTH)

### C-terminal chimera co-expression

#### Gas family

#### Gai family

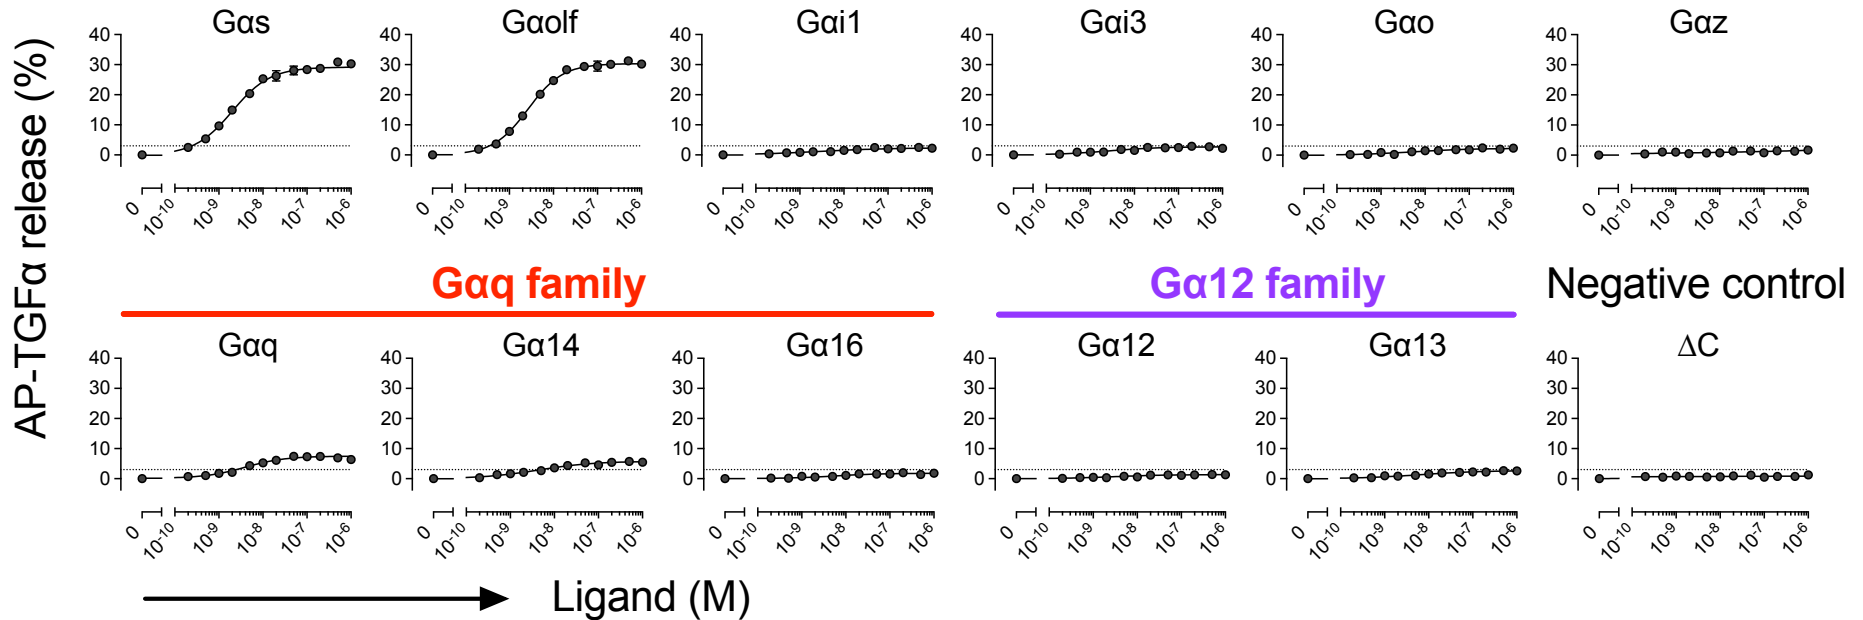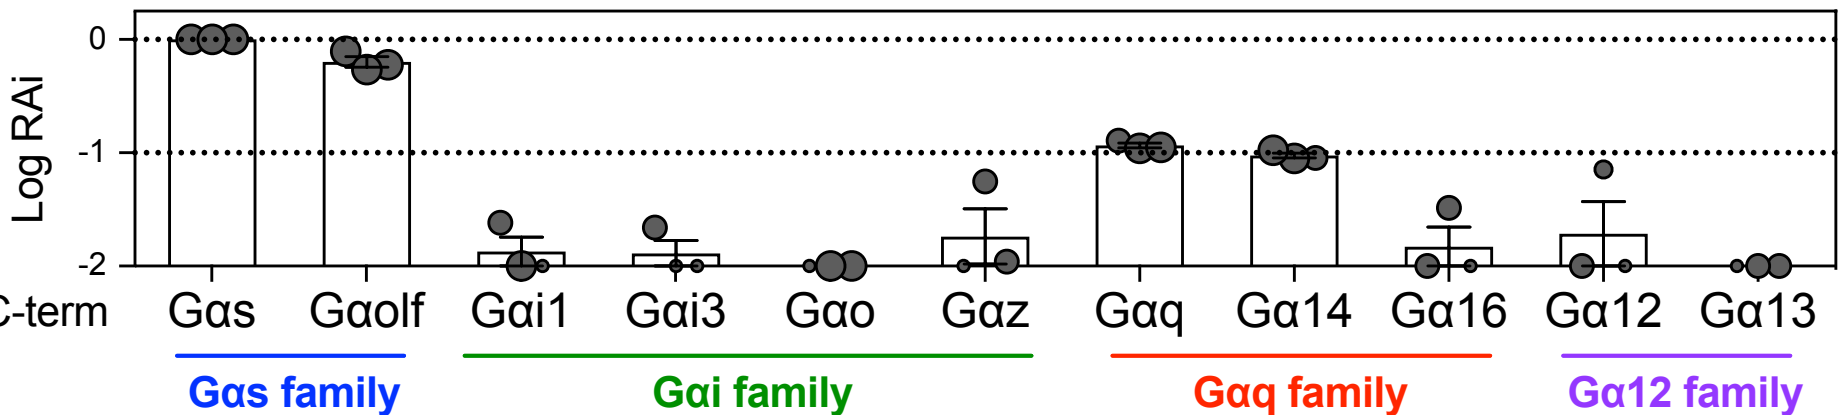

GPCR gene symbol: *PTH2R*

GPCR name: PTH2

Tested ligand: TIP39

### C-terminal chimera co-expression

#### Gas family

#### Gai family

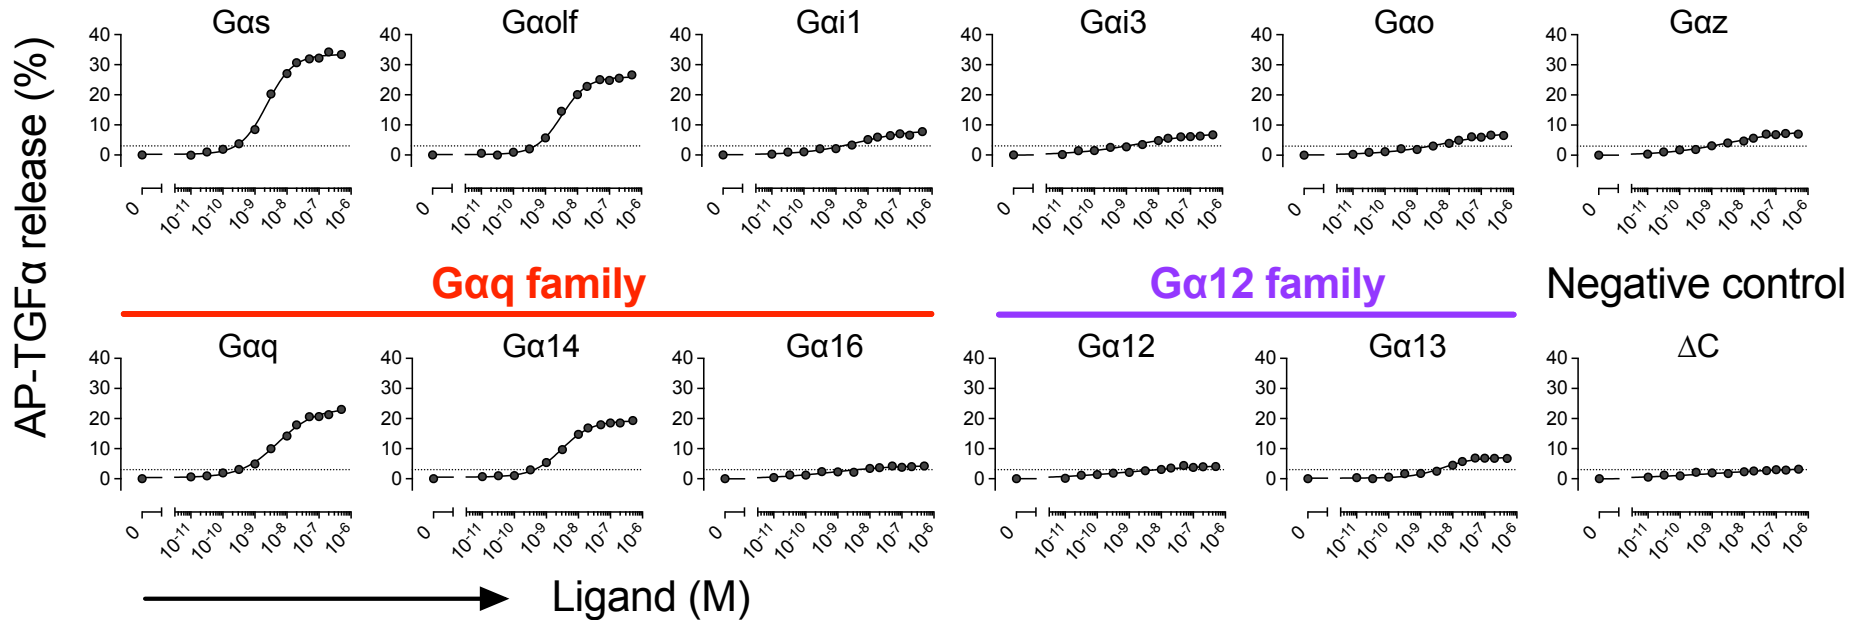

$E_{max}$  (%AP-TGF $\alpha$  release)

● <3%   ● 3-5%   ● 5-10%   ● >10%

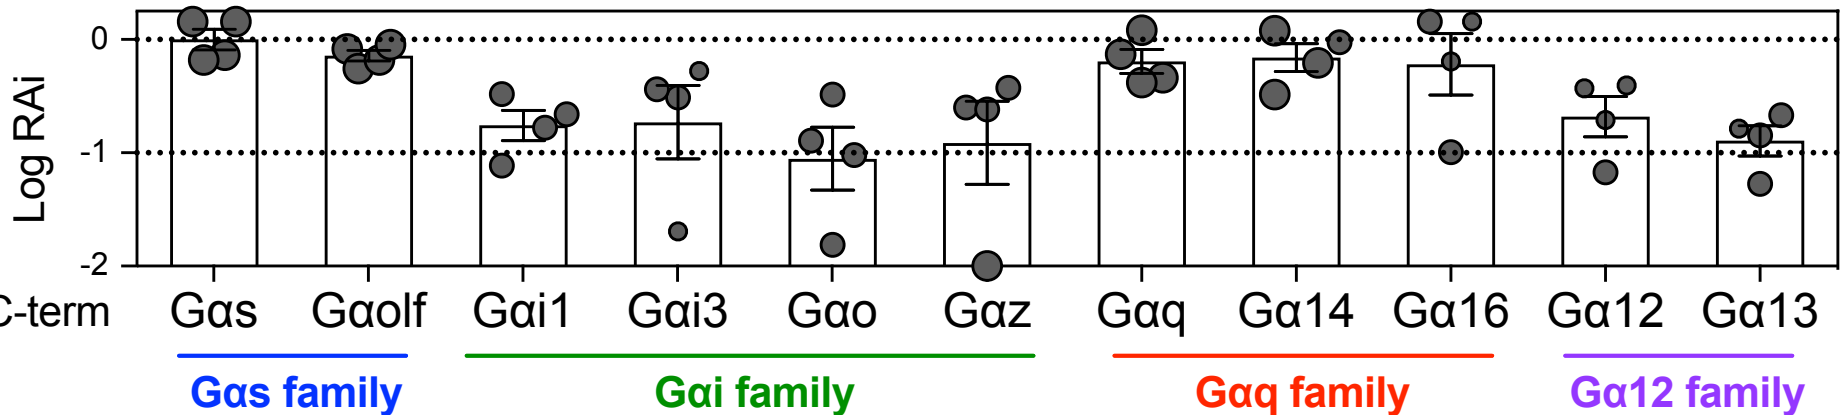

GPCR gene symbol: *S1PR1*

GPCR name: S1P1

Tested ligand: Sphingosine-1-phosphate (+ 10  $\mu$ M JTE-013)

### C-terminal chimera co-expression

#### Gas family

#### Gai family

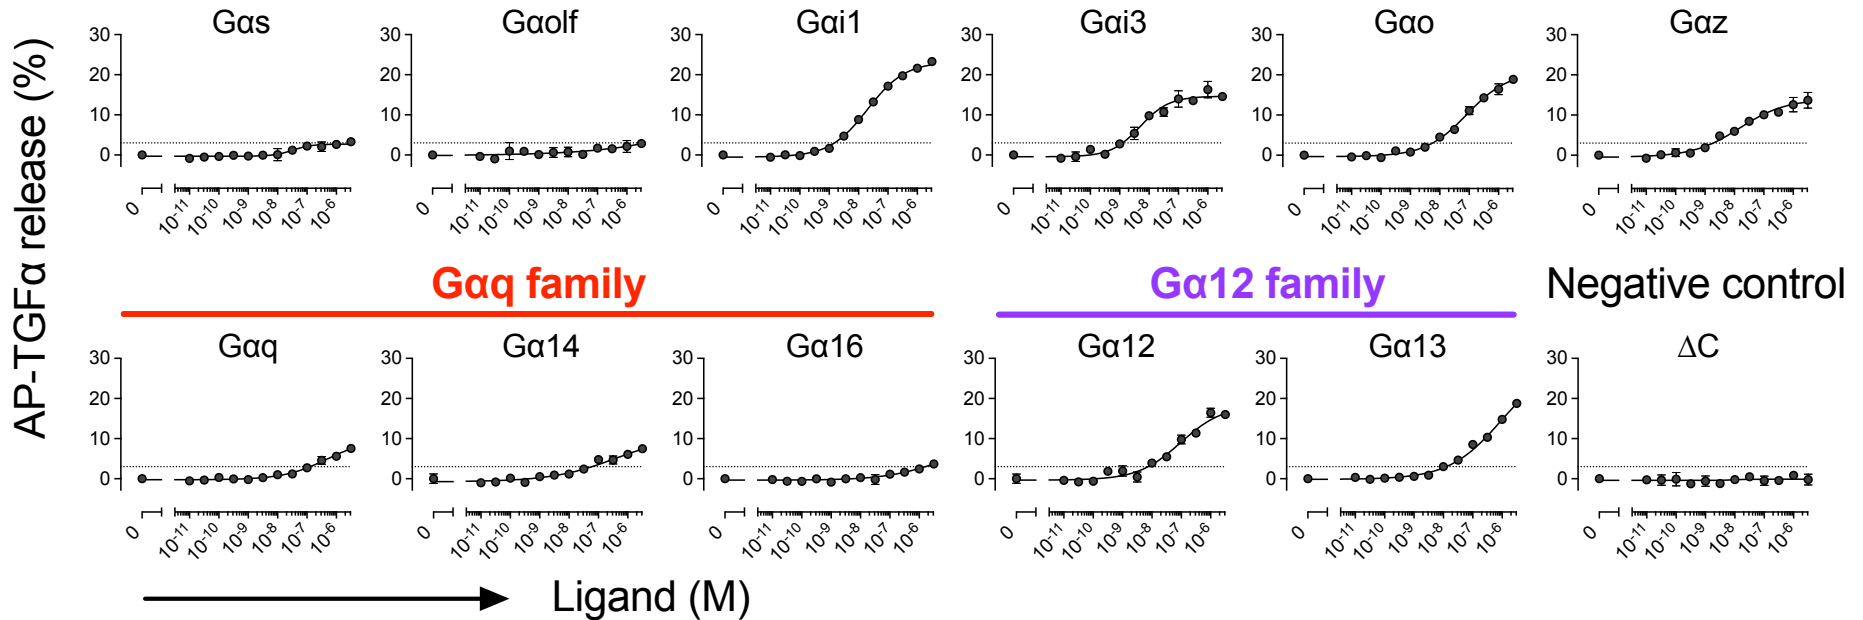

$E_{max}$  (%AP-TGF $\alpha$  release)

• <3%

• 3-5%

• 5-10%

• >10%

Log RAI

0

-1

-2

C-term

Gas

Gaolf

Gai1

Gai3

Gao

Gaz

Gaq

G $\alpha$ 14

G $\alpha$ 16

G $\alpha$ 12

G $\alpha$ 13

Gas family

Gai family

Gaq family

G $\alpha$ 12 family

GPCR gene symbol: *S1PR2*

GPCR name: S1P2

Tested ligand: Sphingosine-1-phosphate

### C-terminal chimera co-expression

#### Gas family

#### Gai family

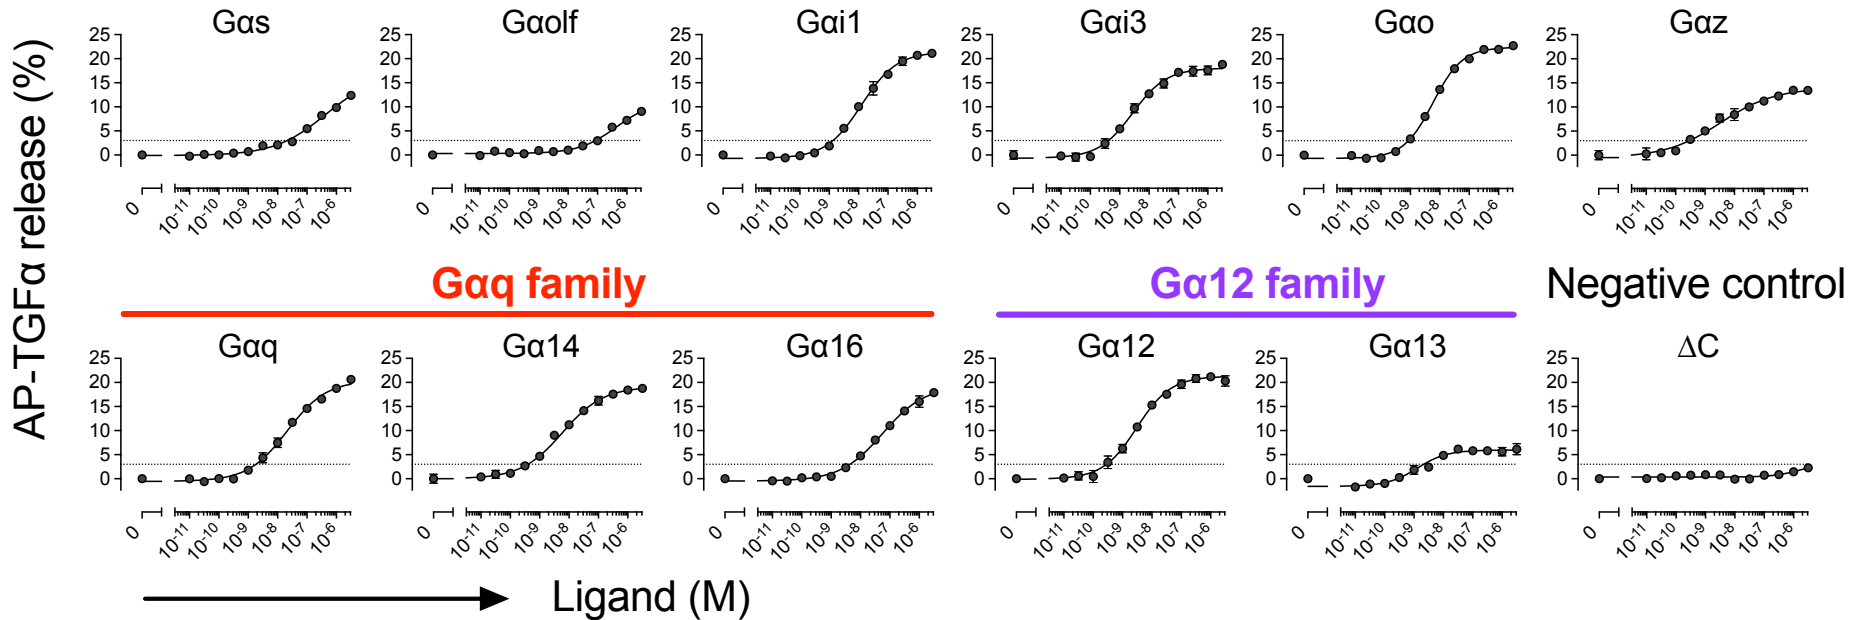

$E_{max}$  (%AP-TGFα release)

● <3%

● 3-5%

● 5-10%

● >10%

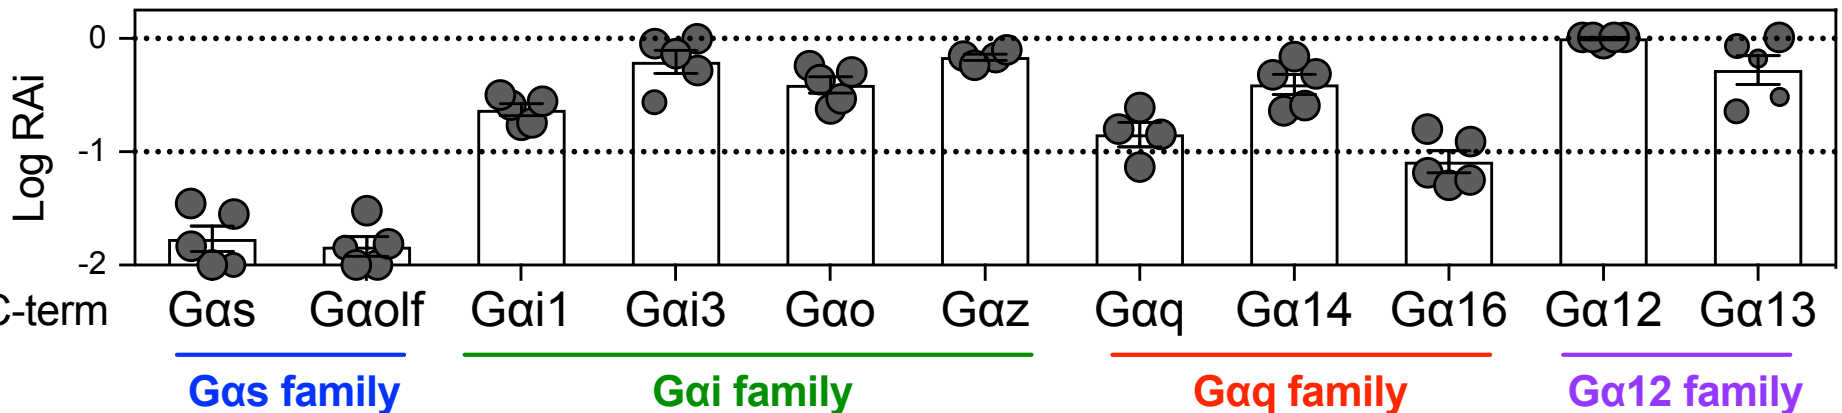



GPCR gene symbol: *S1PR3*

GPCR name: S1P3

Tested ligand: Sphingosine-1-phosphate (+ 10  $\mu$ M JTE-013)

### C-terminal chimera co-expression

#### Gas family

#### Gai family

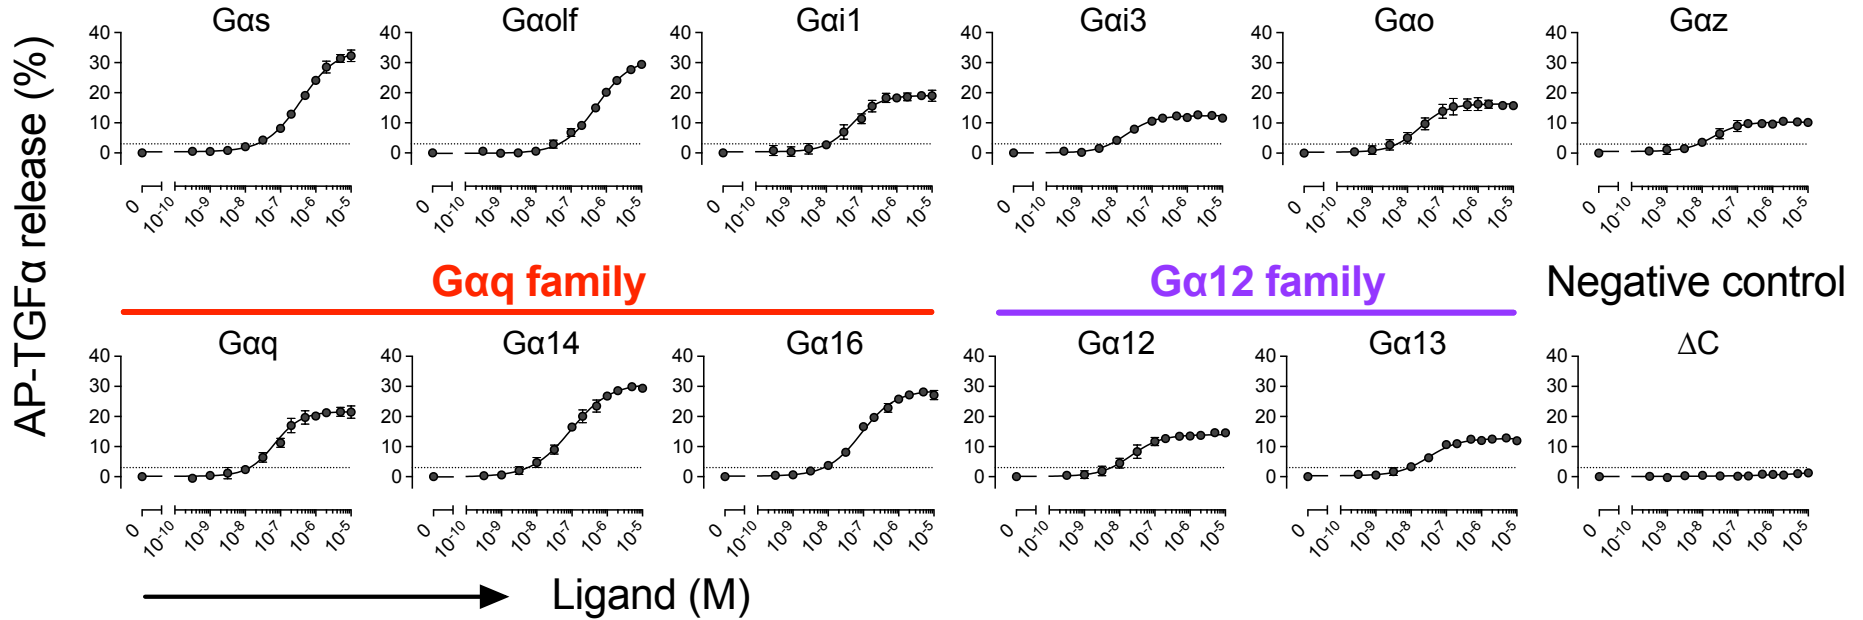

$E_{max}$  (%AP-TGF $\alpha$  release)

● <3%   ● 3-5%   ● 5-10%   ● >10%

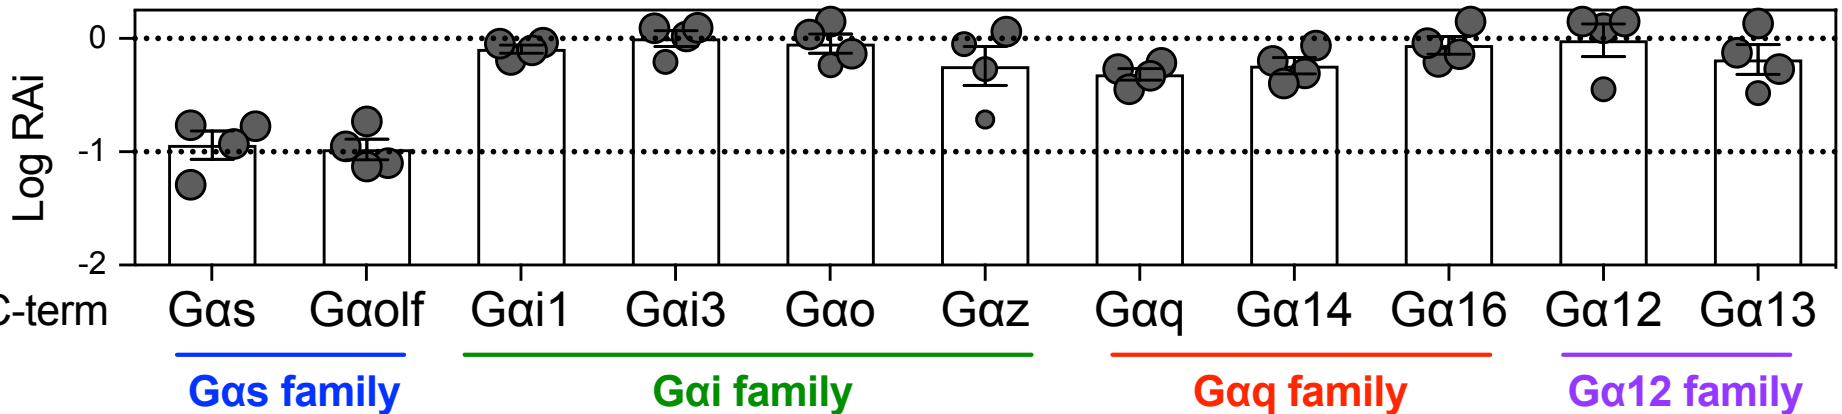

GPCR gene symbol: *S1PR5*

GPCR name: S1P5

Tested ligand: Sphingosine-1-phosphate (+ 10  $\mu$ M JTE-013)

### C-terminal chimera co-expression

#### Gas family

#### Gai family

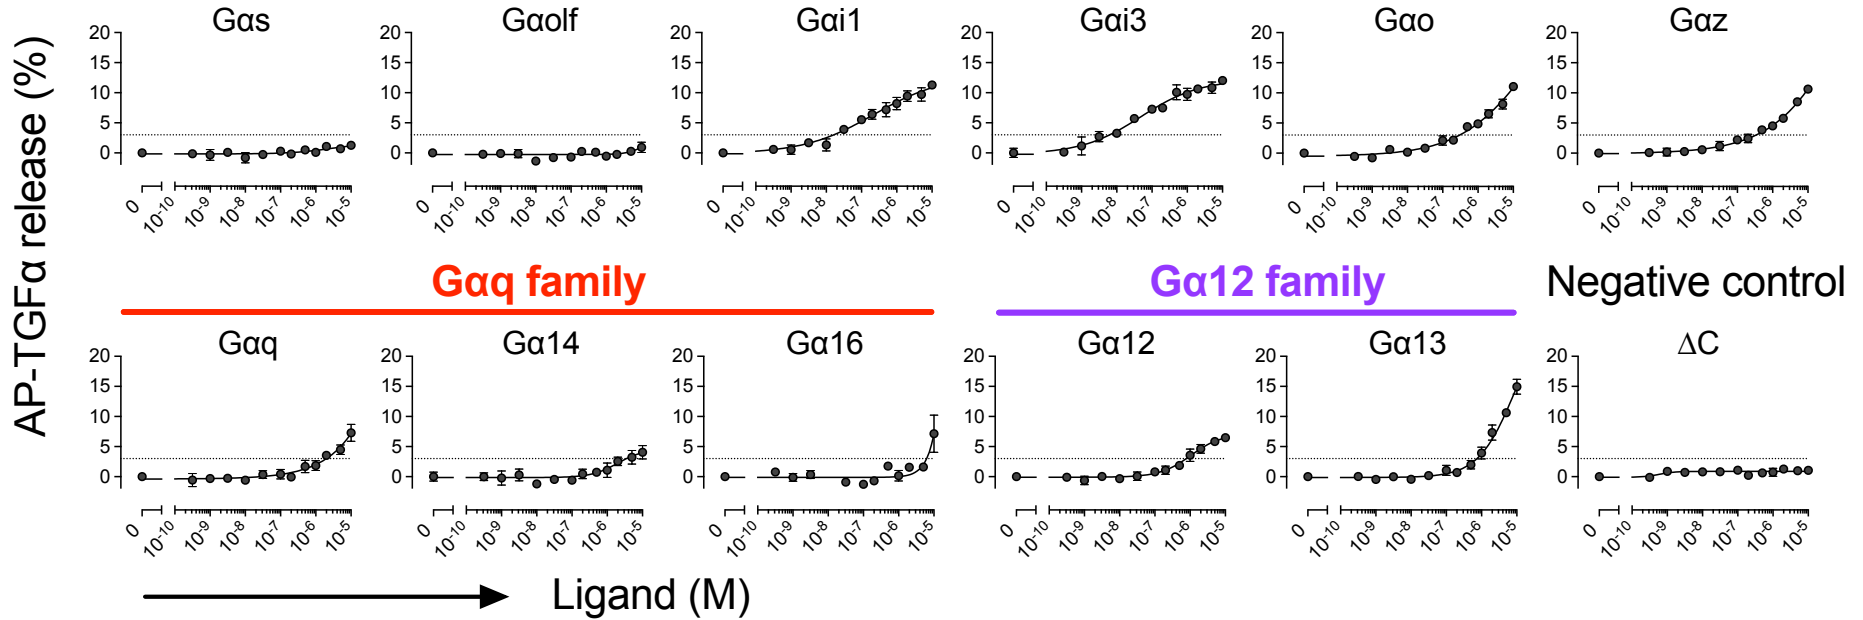

$E_{max}$  (%AP-TGF $\alpha$  release)    ● <3%    ● 3-5%    ● 5-10%    ● >10%

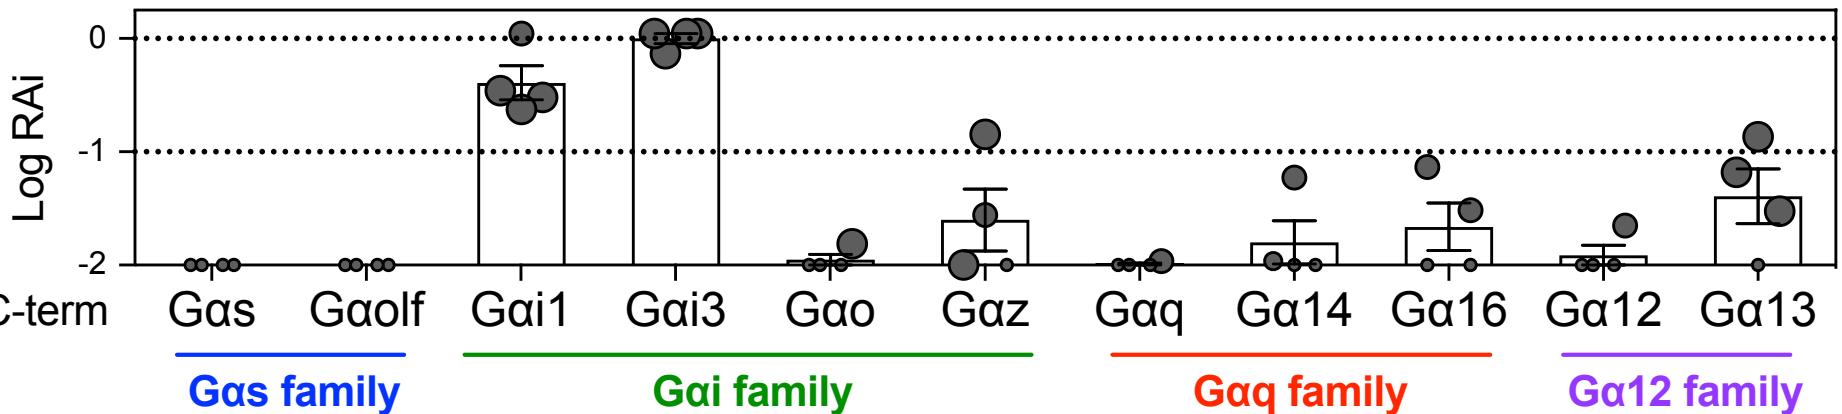

GPCR gene symbol: *SSTR1*

GPCR name: SST1

Tested ligand: Somatostatin

### C-terminal chimera co-expression

#### Gas family

#### Gai family

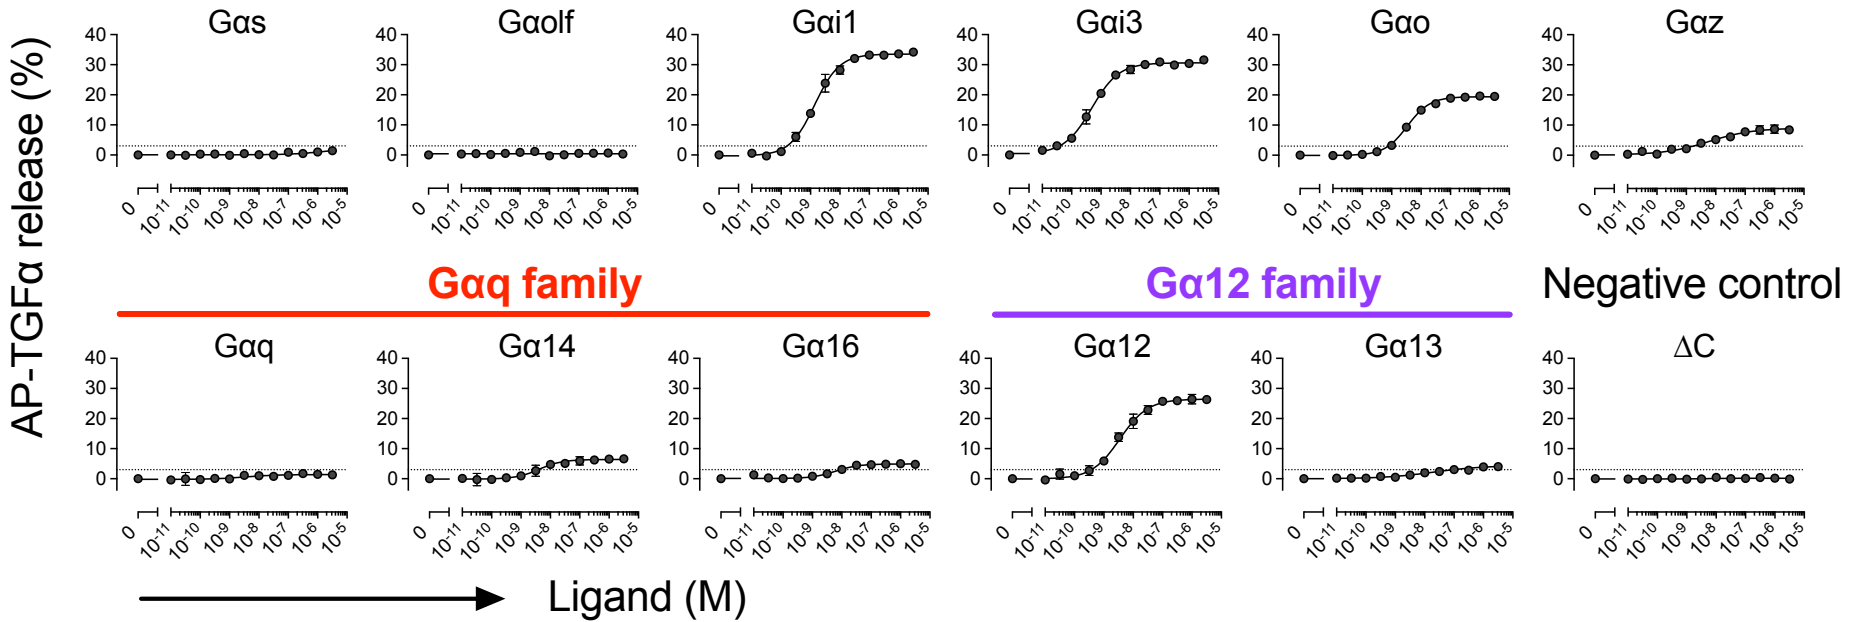

$E_{max}$  (%AP-TGFα release)

● <3%   ● 3-5%   ● 5-10%   ● >10%

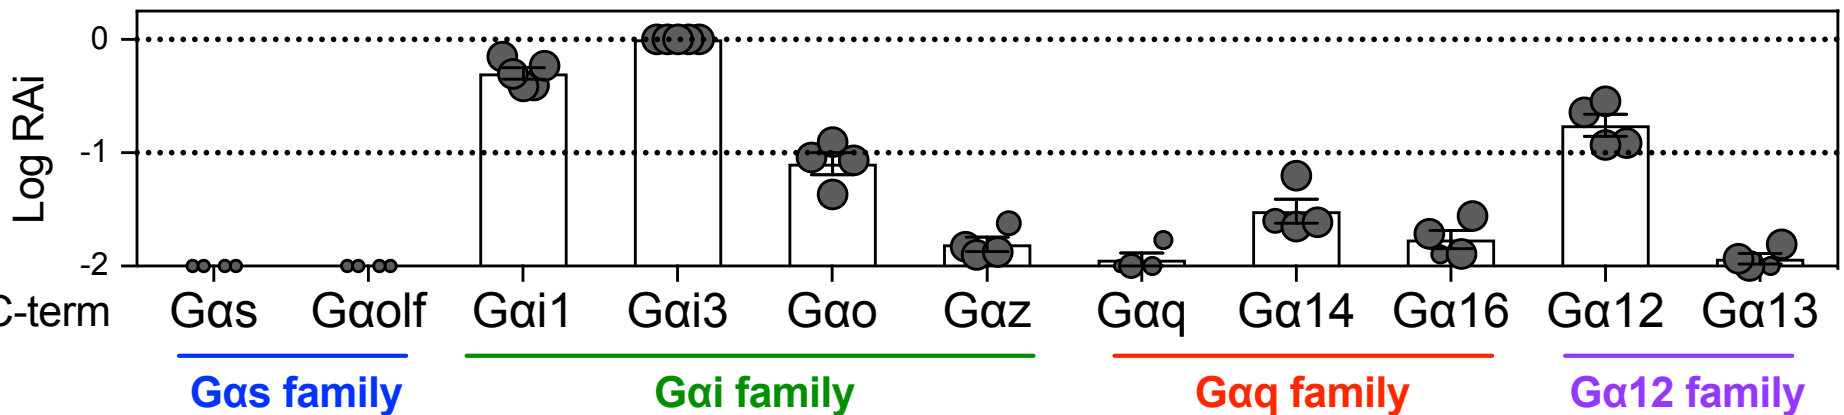

GPCR gene symbol: *SSTR2*

GPCR name: SST2

Tested ligand: Somatostatin

### C-terminal chimera co-expression

#### Gas family

#### Gai family

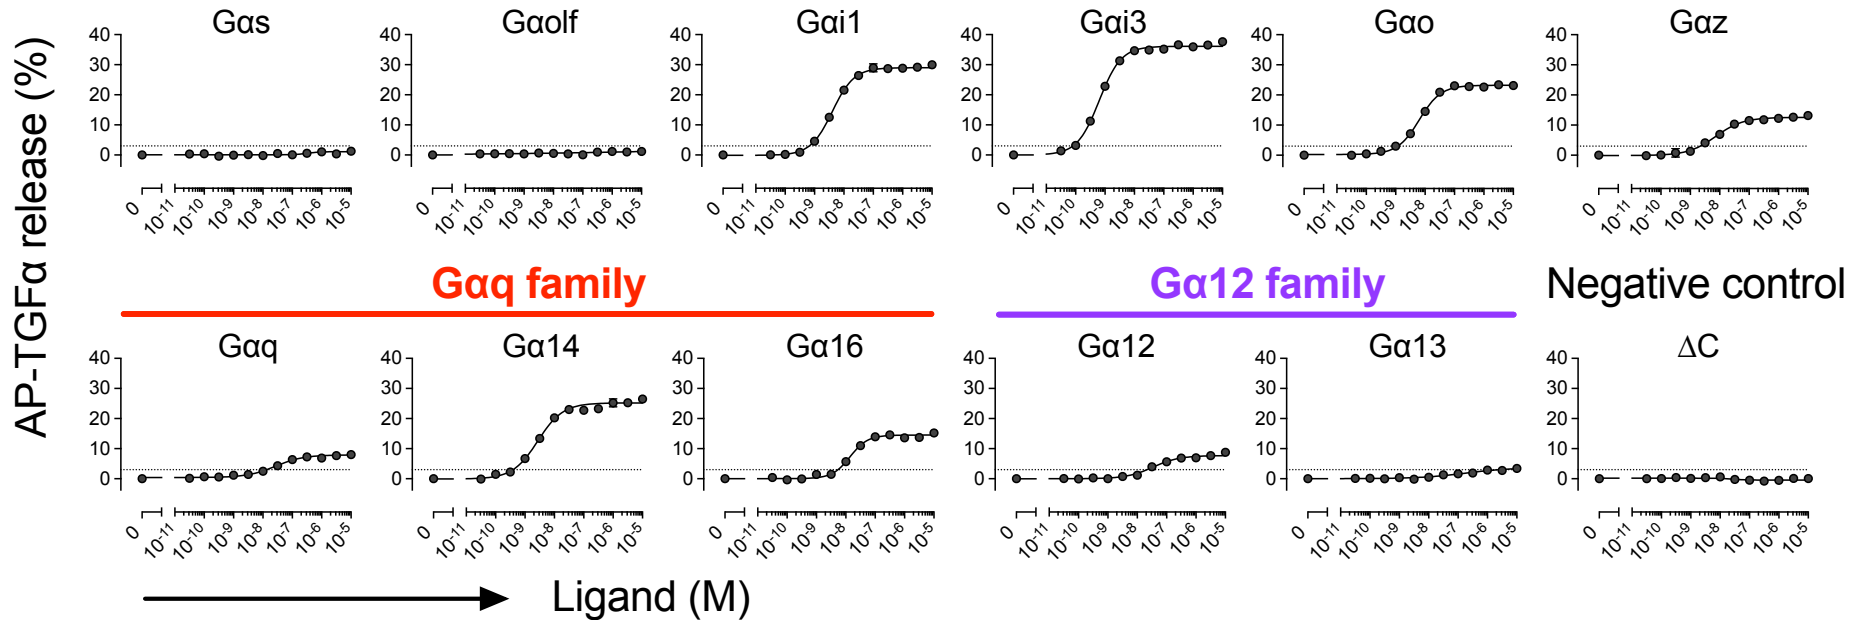

$E_{max}$  (%AP-TGFα release)

● <3%   ● 3-5%   ● 5-10%   ● >10%

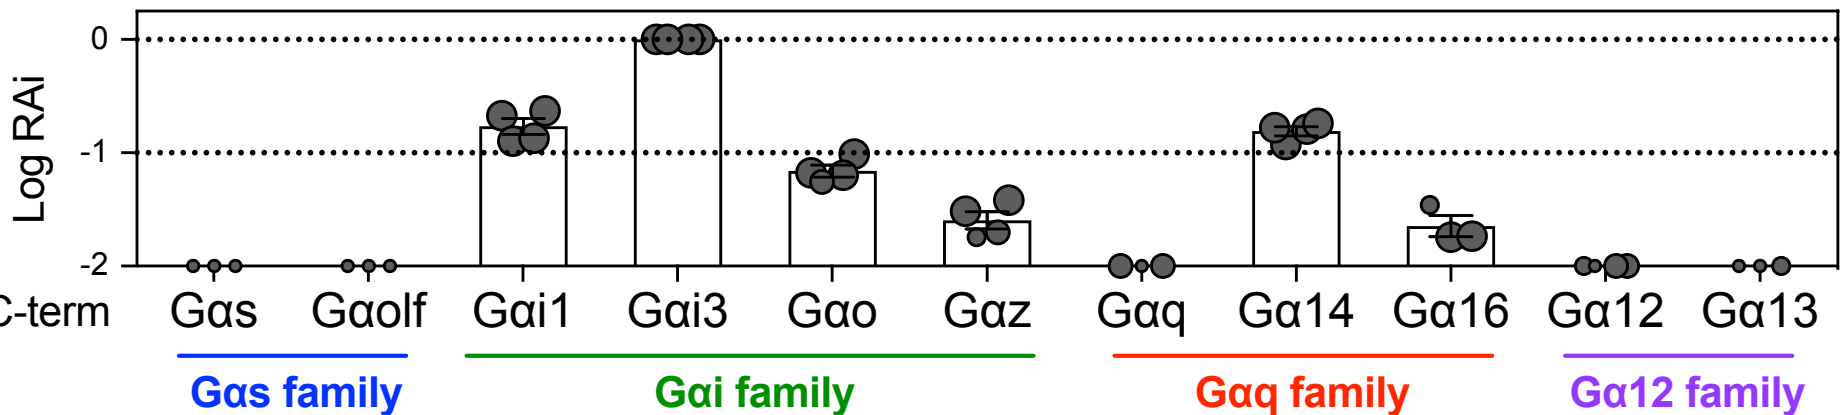

GPCR gene symbol: *SSTR3*

GPCR name: SST3

Tested ligand: Somatostatin

### C-terminal chimera co-expression

#### Gas family

#### Gai family

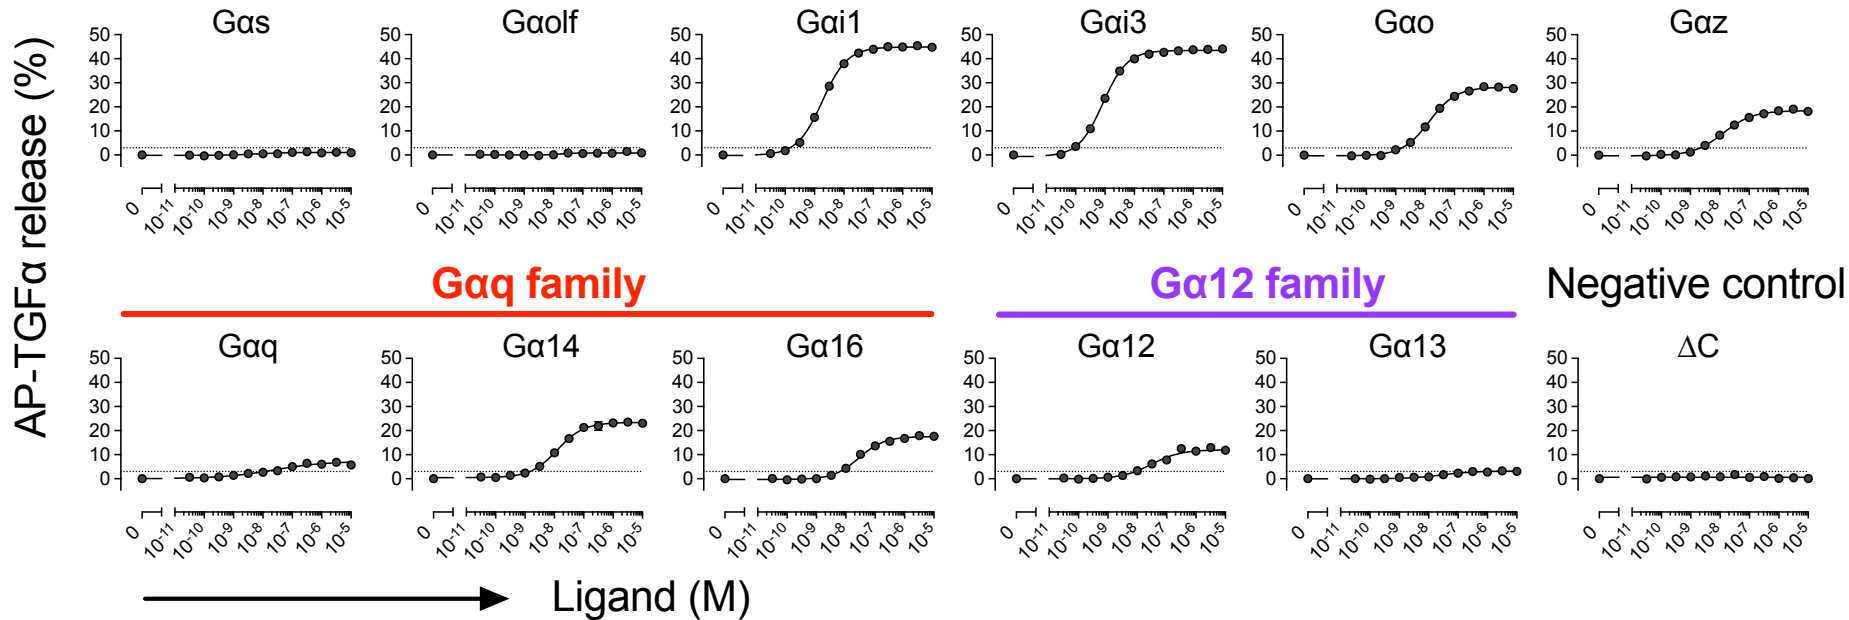

$E_{max}$  (%AP-TGFα release)    ● <3%    ● 3-5%    ● 5-10%    ● >10%

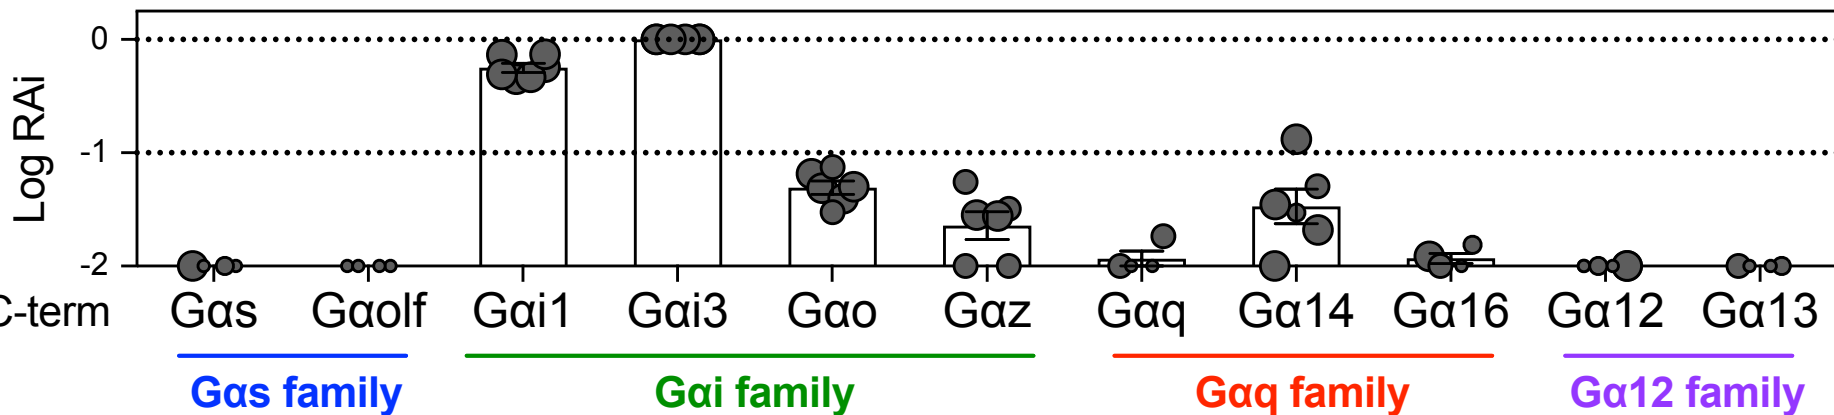

GPCR gene symbol: *SSTR4*

GPCR name: SST4

Tested ligand: Somatostatin

### C-terminal chimera co-expression

#### Gas family

#### Gai family

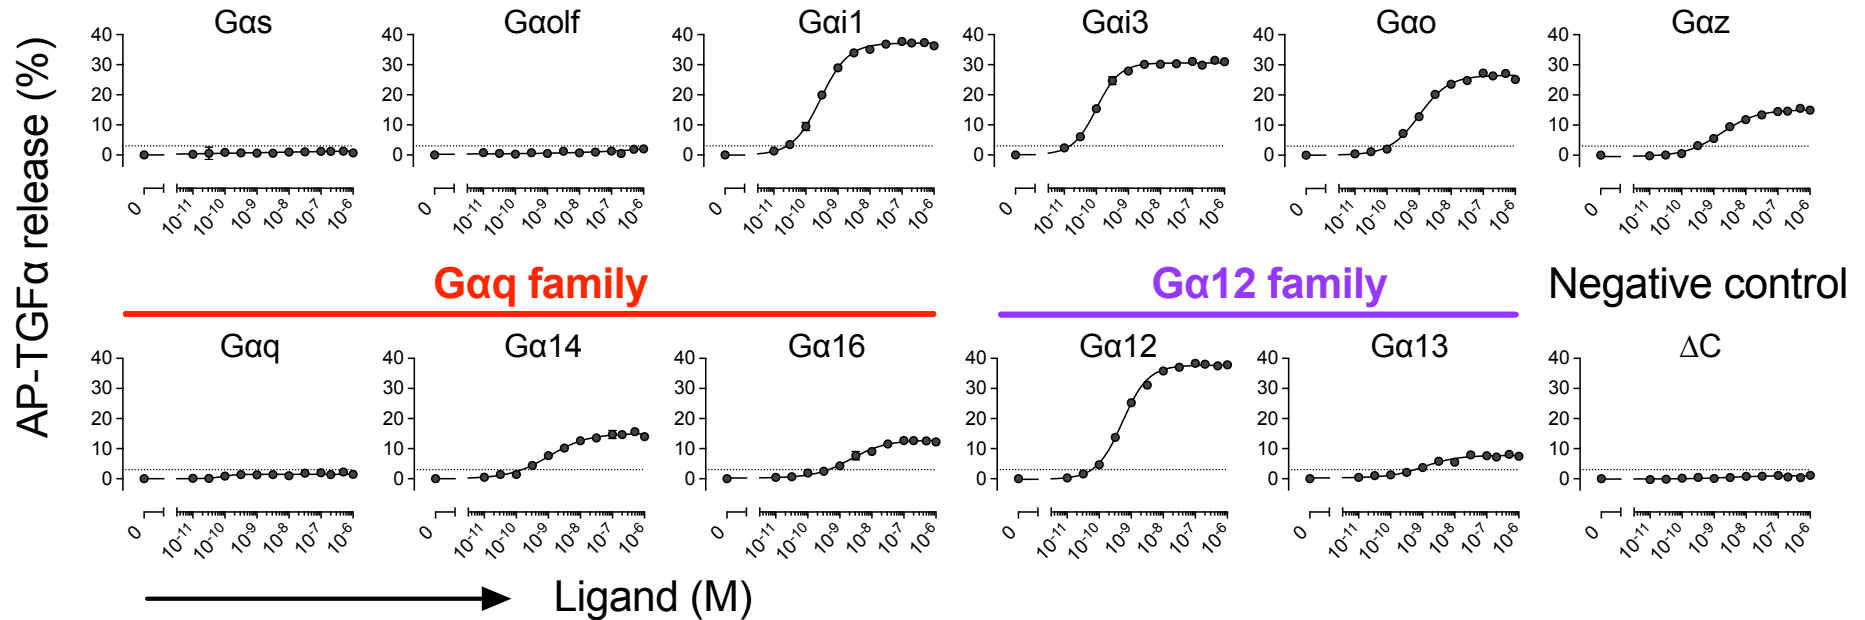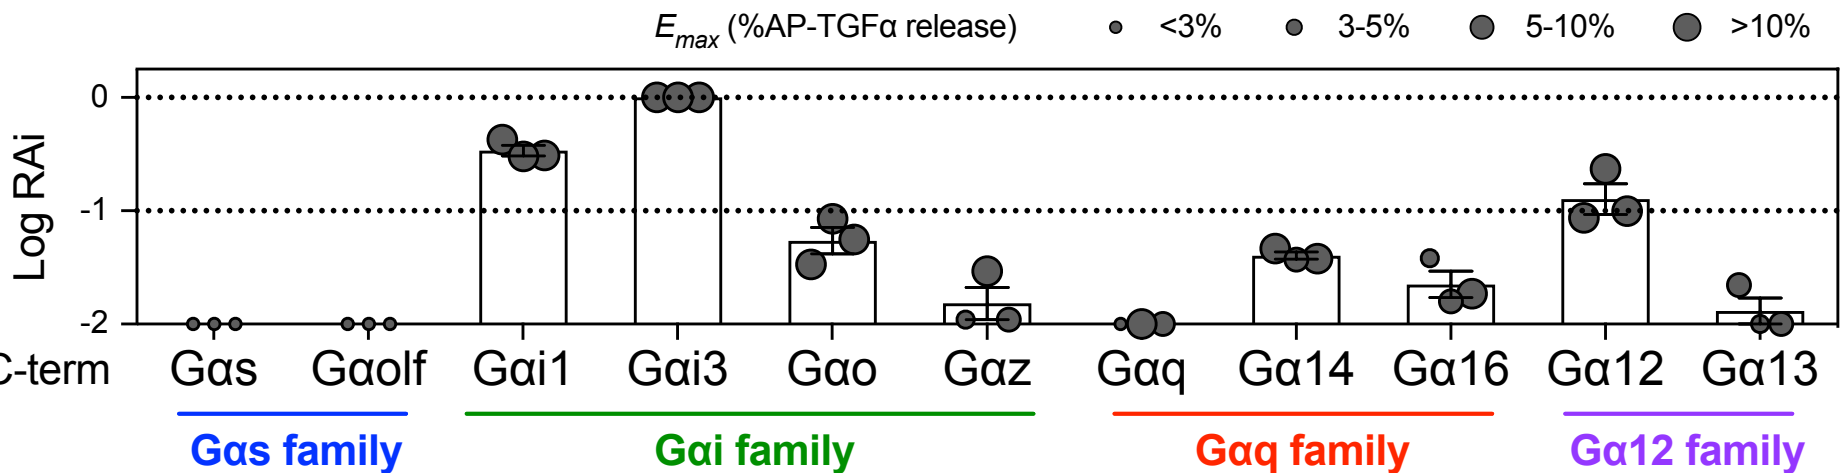

GPCR gene symbol: *SSTR5*

GPCR name: SST5

Tested ligand: Somatostatin

### C-terminal chimera co-expression

#### Gas family

#### Gai family

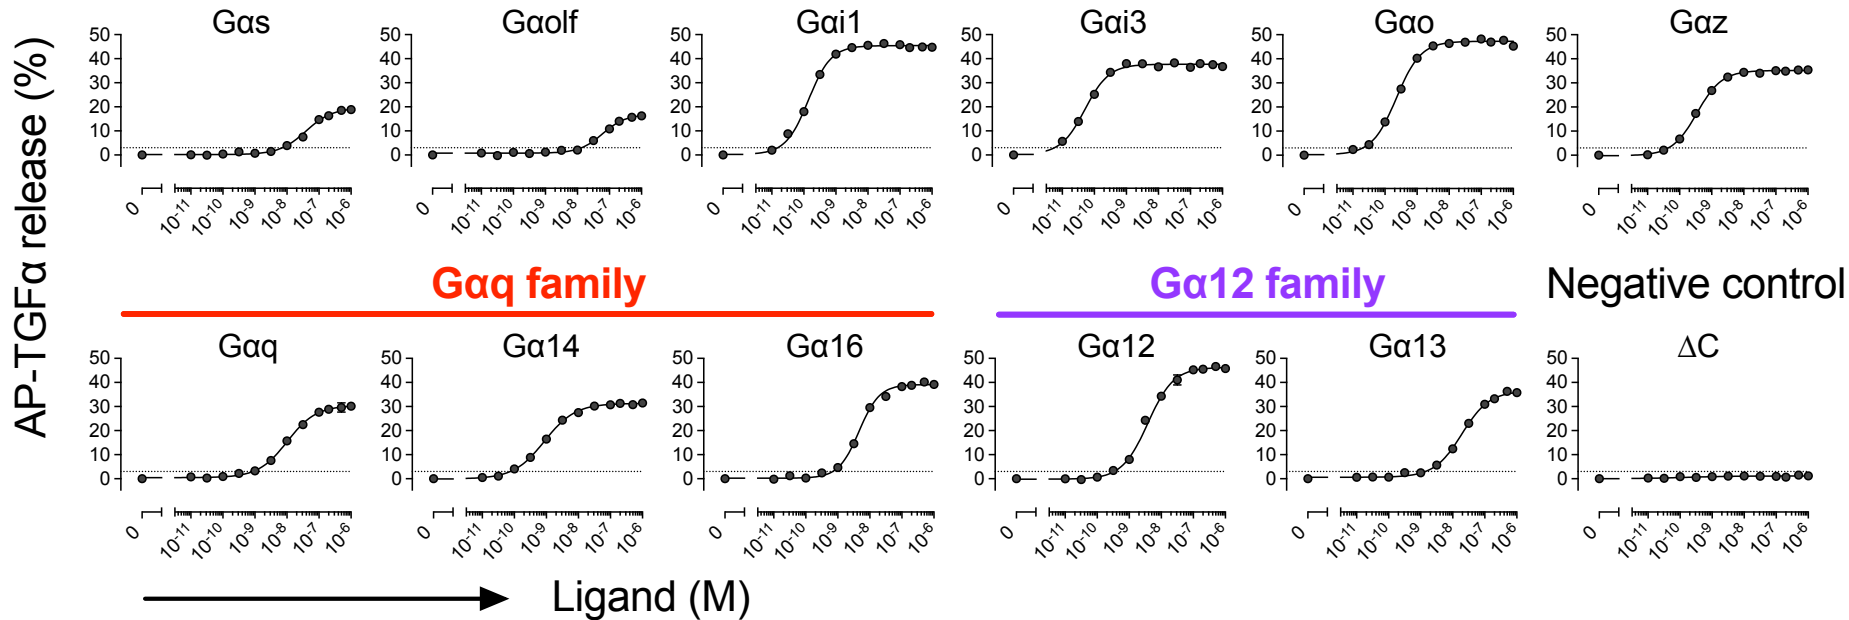

$E_{max}$  (%AP-TGFα release)    ● <3%    ● 3-5%    ● 5-10%    ● >10%

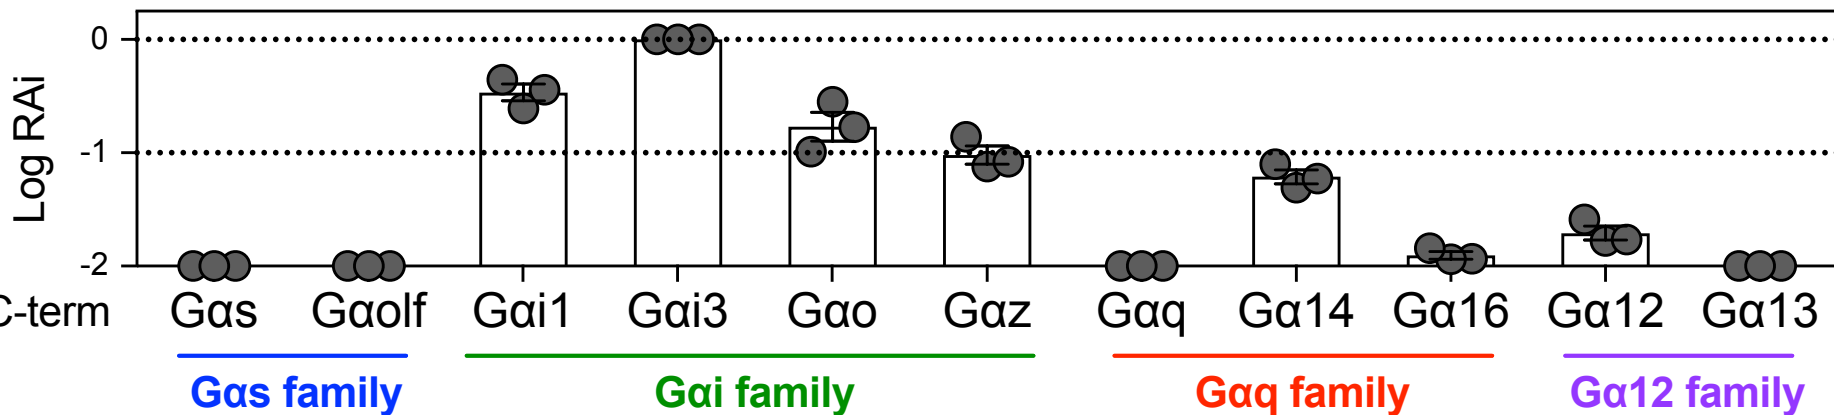

GPCR gene symbol: *TACR1*

GPCR name: NK1

Tested ligand: Substance P

### C-terminal chimera co-expression

#### Gas family

#### Gai family

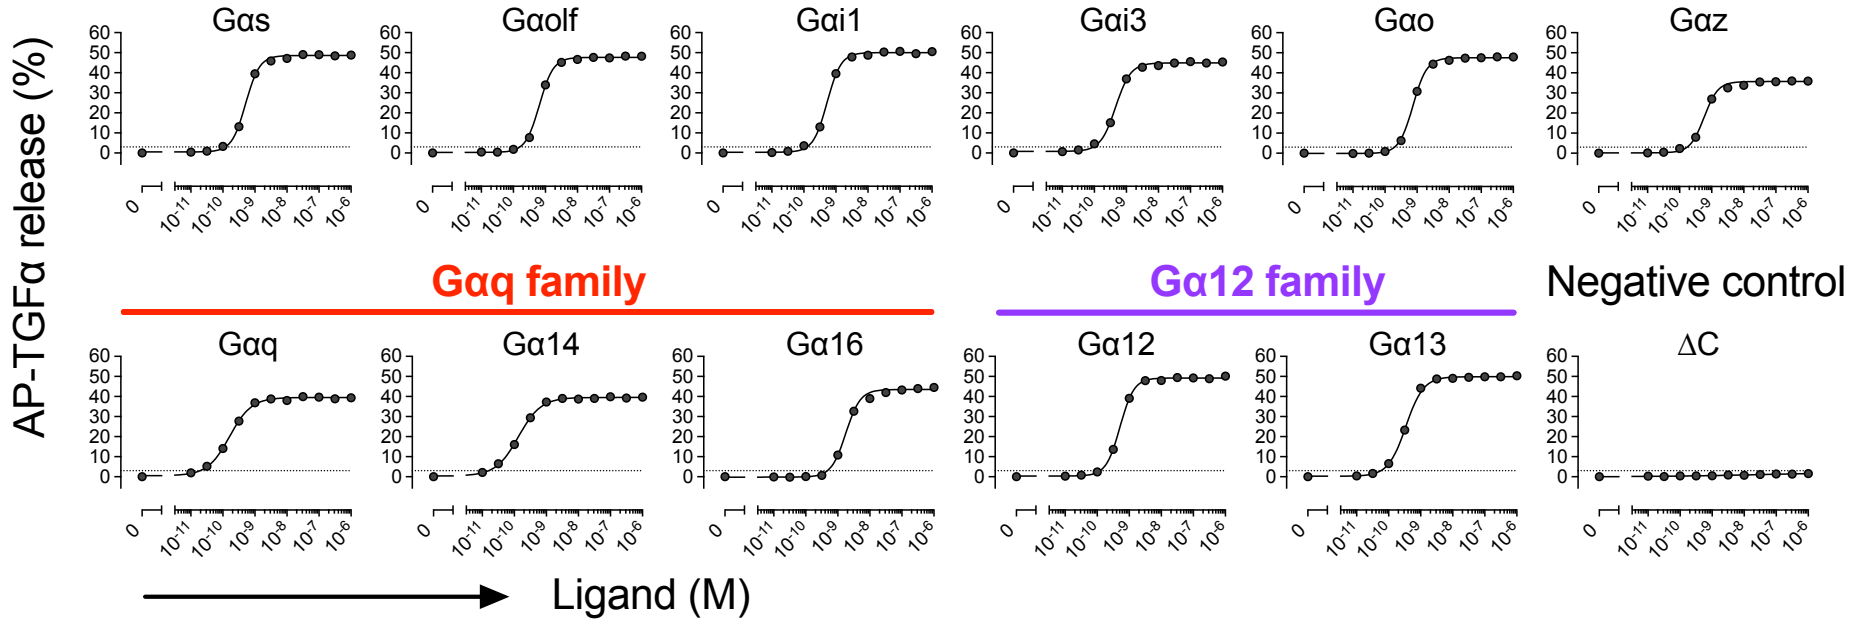

$E_{max}$  (%AP-TGFα release)    ● <3%    ● 3-5%    ● 5-10%    ● >10%

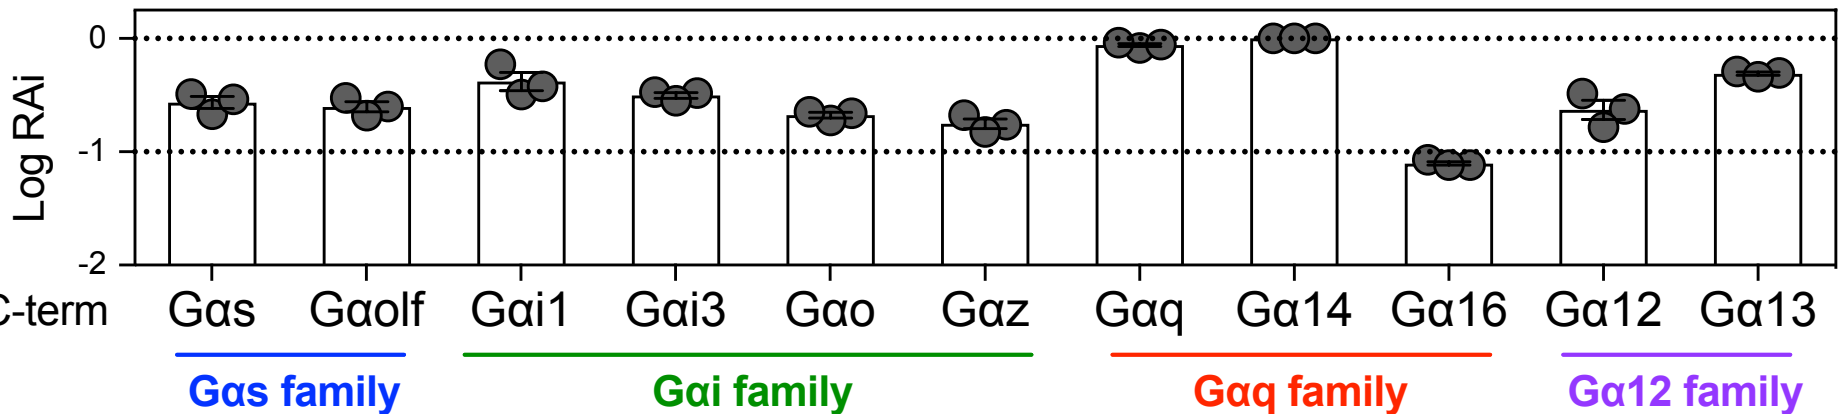



GPCR gene symbol: *TACR2*

GPCR name: NK2

Tested ligand: Neurokinin A

### C-terminal chimera co-expression

#### Gas family

#### Gai family

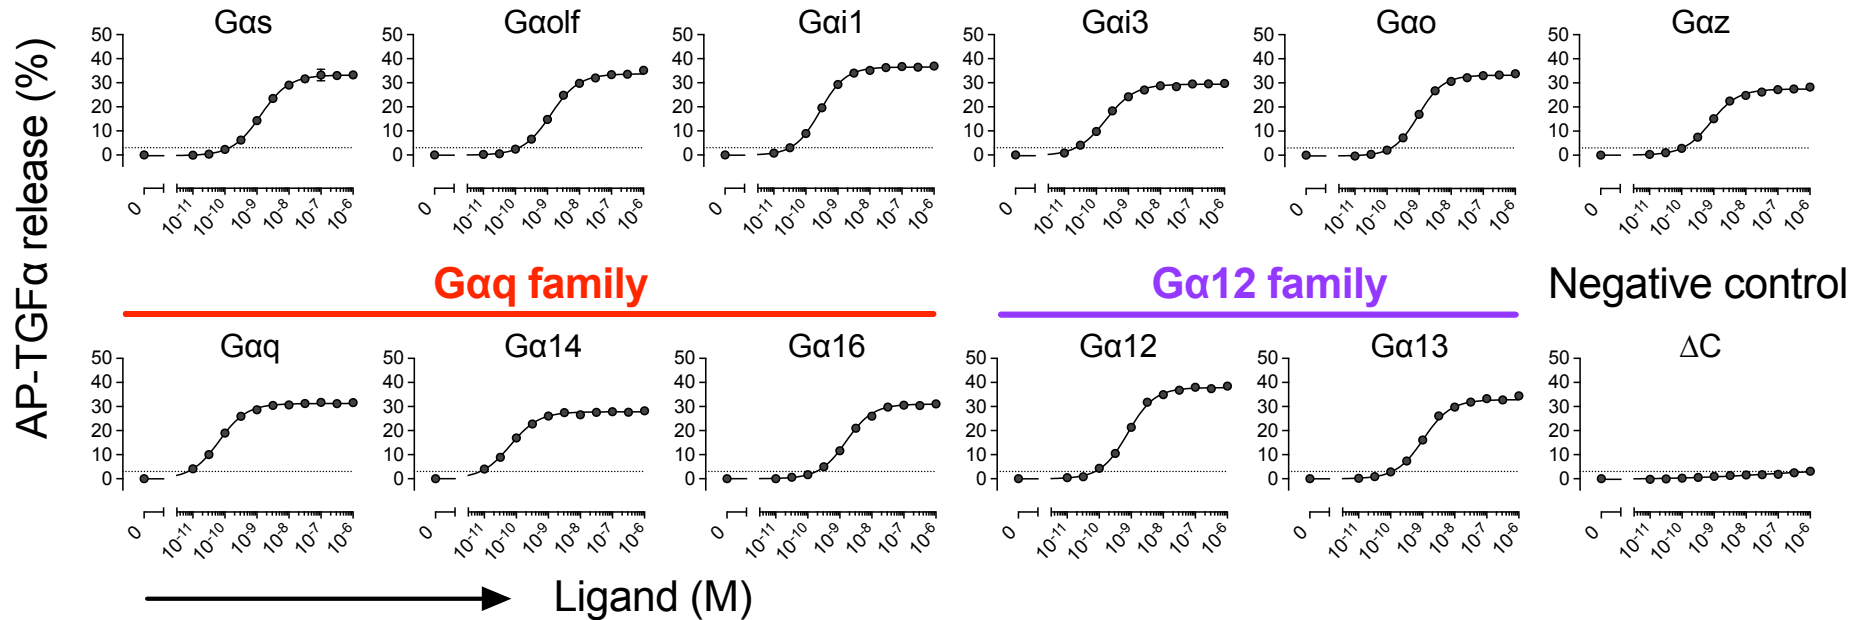

$E_{max}$  (%AP-TGFα release)    ● <3%    ● 3-5%    ● 5-10%    ● >10%

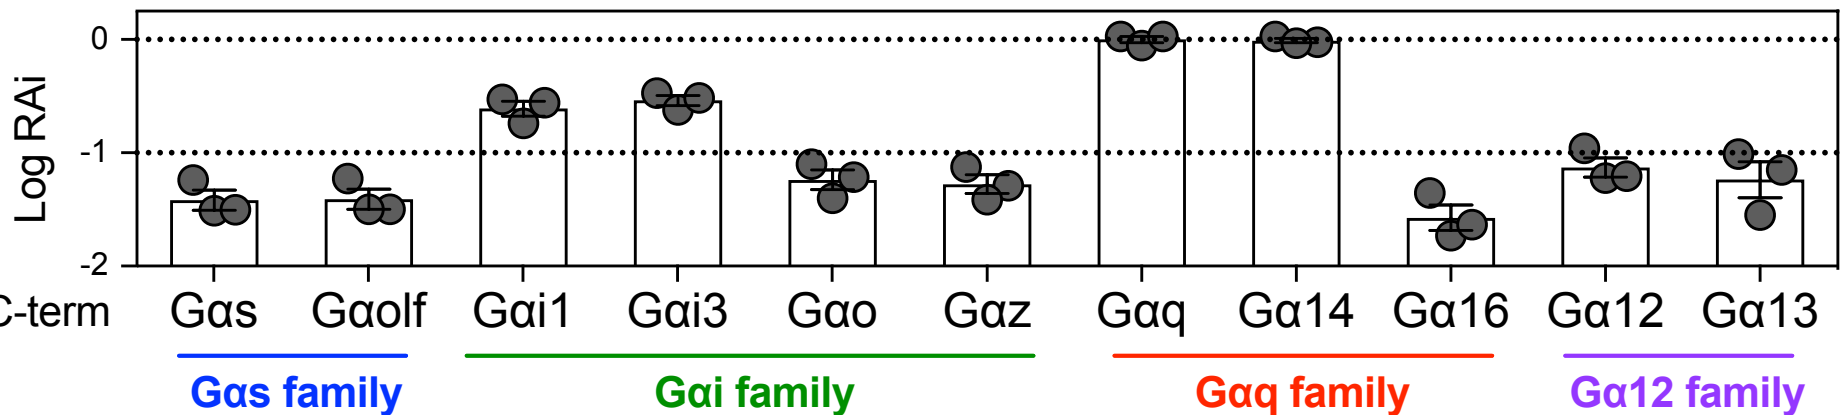

GPCR gene symbol: *TACR3*

GPCR name: NK3

Tested ligand: Neurokinin B

### C-terminal chimera co-expression

#### Gas family

#### Gai family

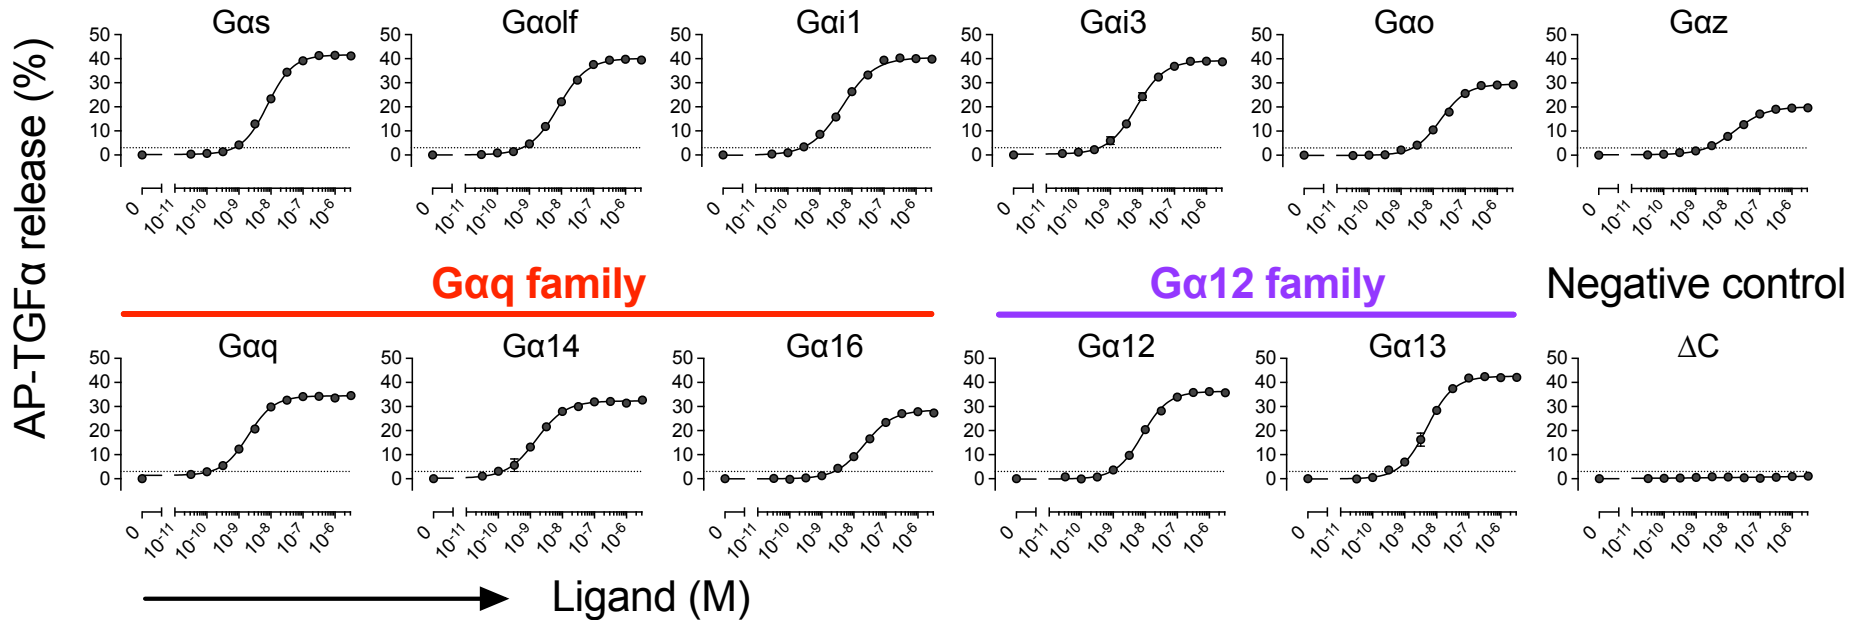

$E_{max}$  (%AP-TGFα release)    ● <3%    ● 3-5%    ● 5-10%    ● >10%

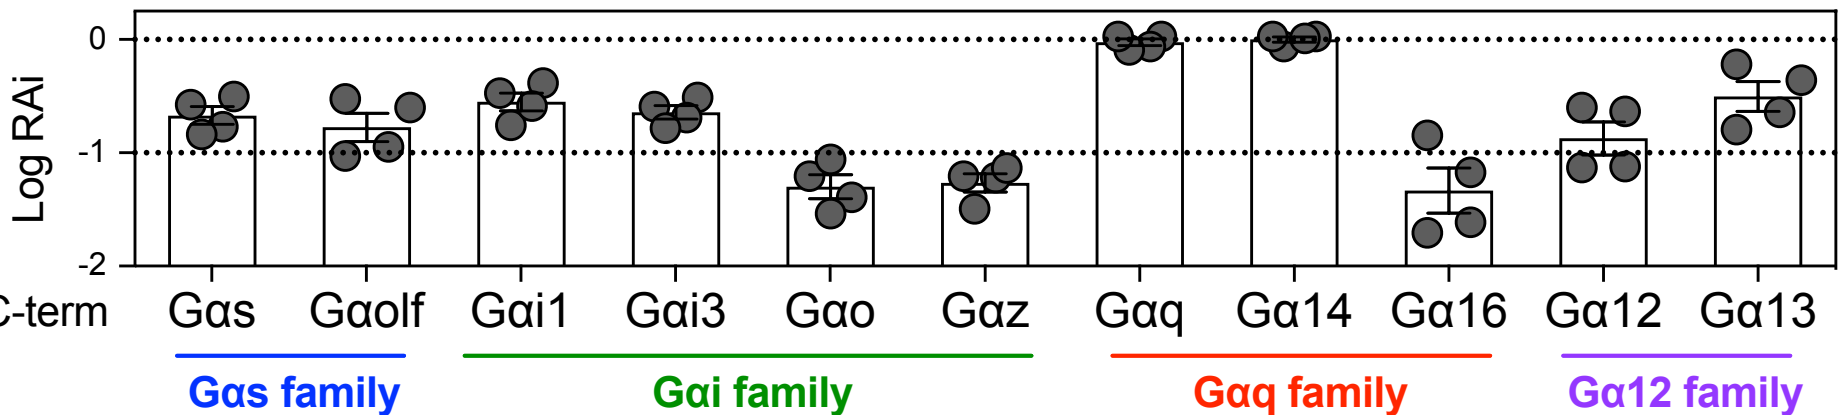

GPCR gene symbol: *TBXA2R*

GPCR name: TP

Tested ligand: U-46619

### C-terminal chimera co-expression

#### Gas family

#### Gai family

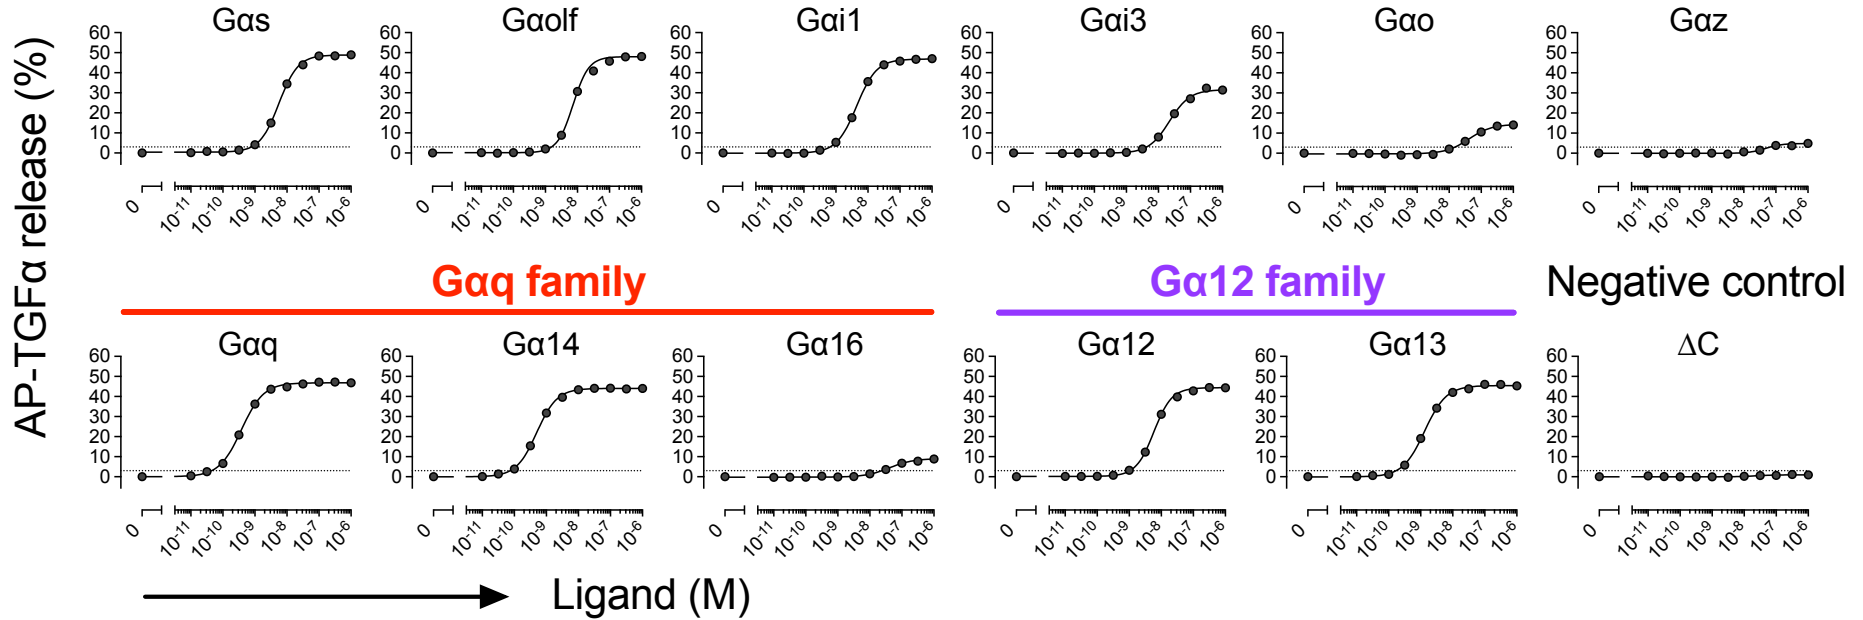

$E_{max}$  (%AP-TGFα release)    ● <3%    ● 3-5%    ● 5-10%    ● >10%

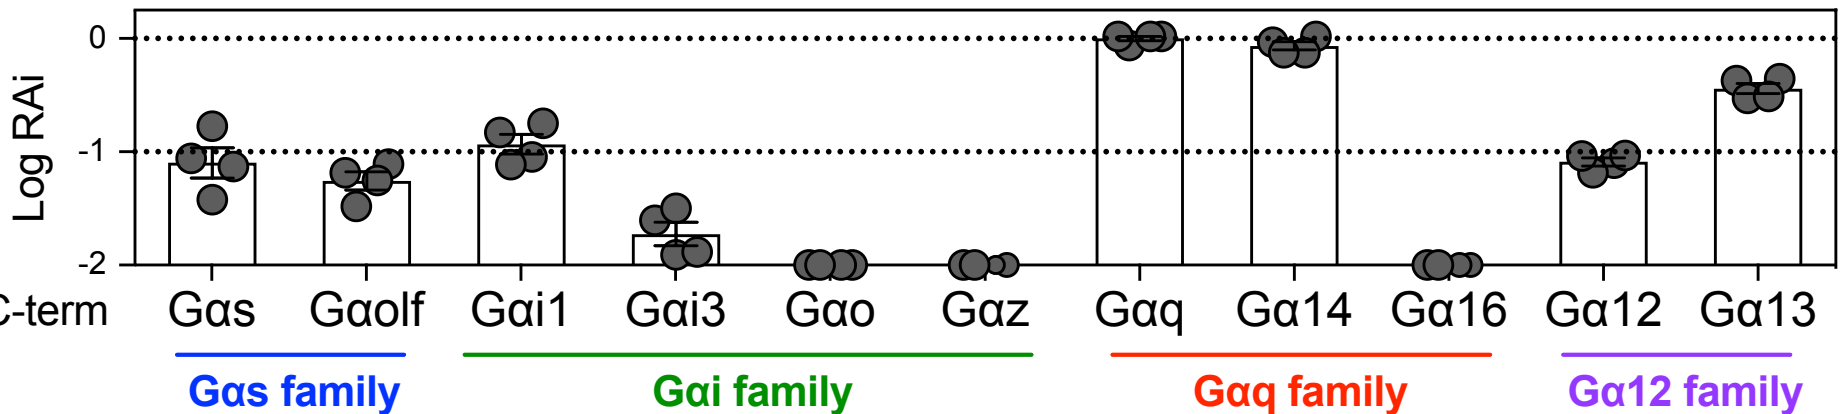

GPCR gene symbol: *UTS2R*

GPCR name: UTS2

Tested ligand: Urotensin II

### C-terminal chimera co-expression

#### Gas family

#### Gai family

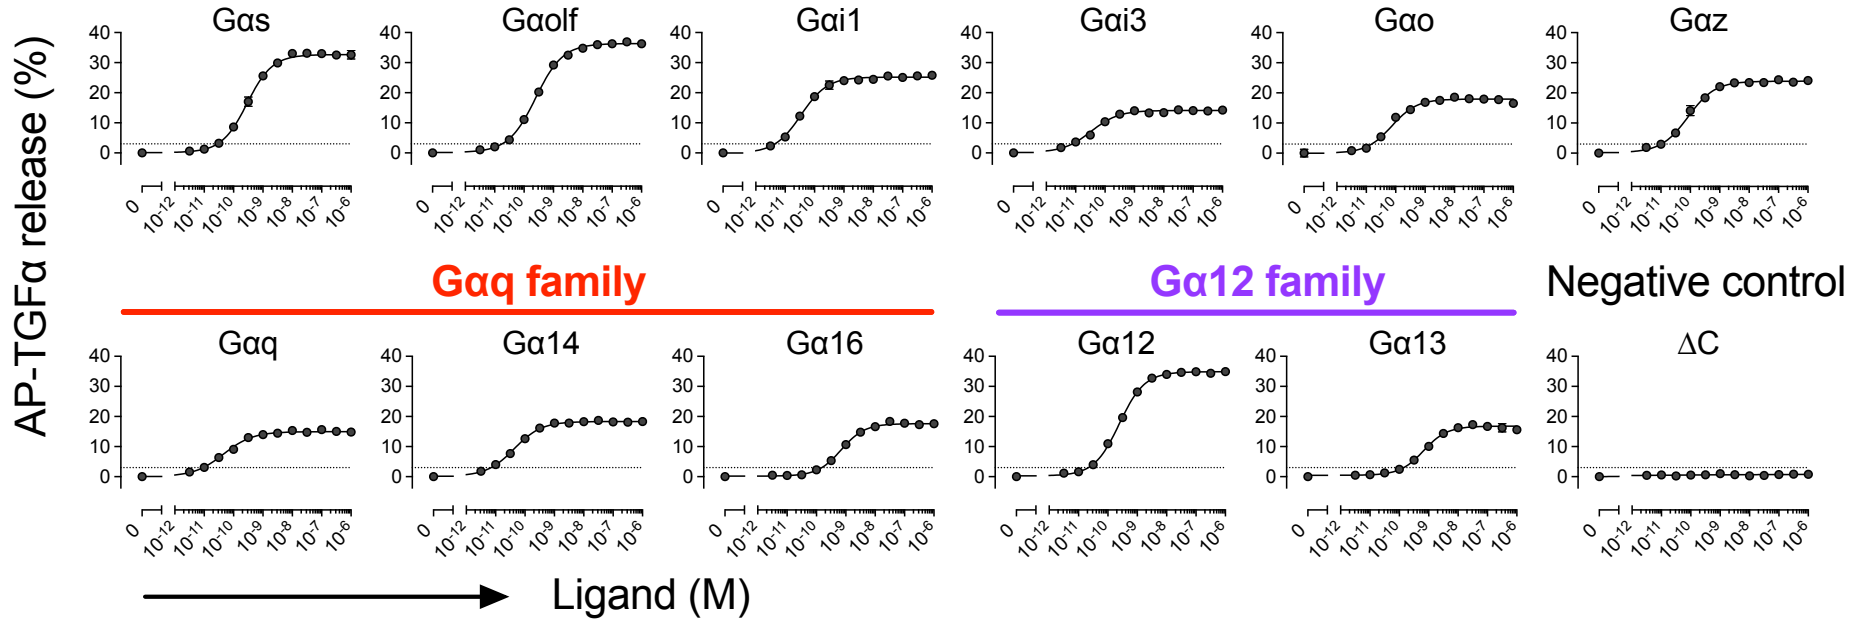

$E_{max}$  (%AP-TGFα release)

● <3%

● 3-5%

● 5-10%

● >10%

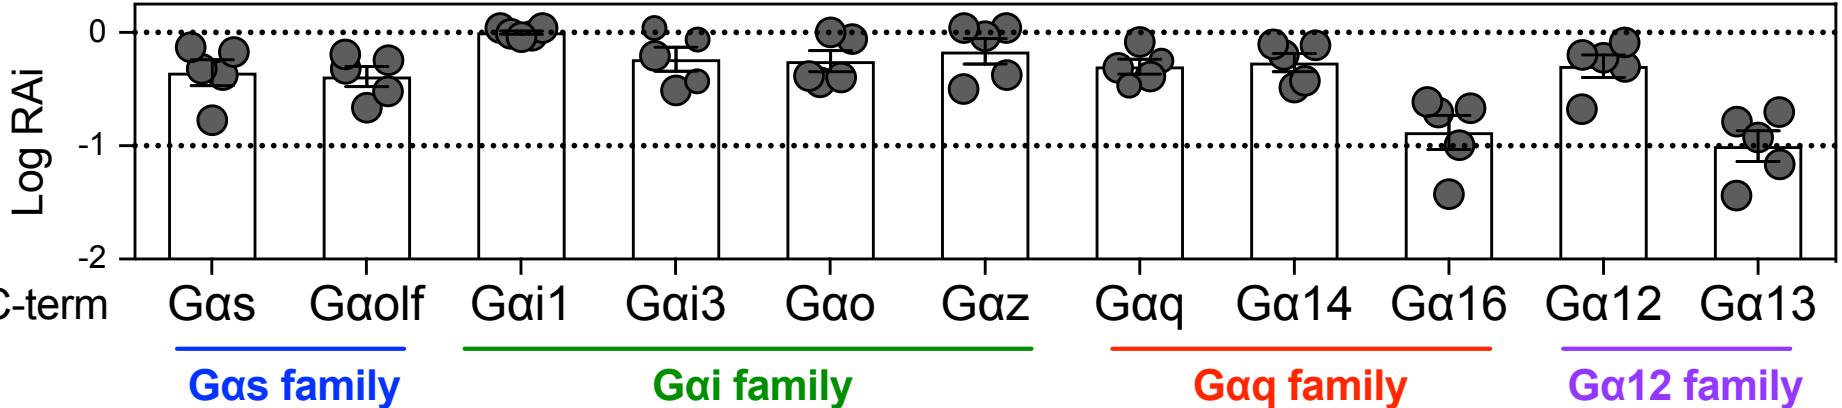

Supplement: NIHMS1044804-supplement-Data_S1.pdf [file NIHMS1044804-supplement-Data_S1.pdf]
