# Supplementary material
Source: PubMed Central journal article supplement (PMC6773469)

GPCR gene symbol: *PTGDR*  
 GPCR name: DP  
 Tested ligand: Prostaglandin D2

### C-terminal chimera co-expression

#### Gas family

#### Gai family

#### Gaq family

#### Gα12 family

#### Negative control

cAMP response  
(normalized to FSK)

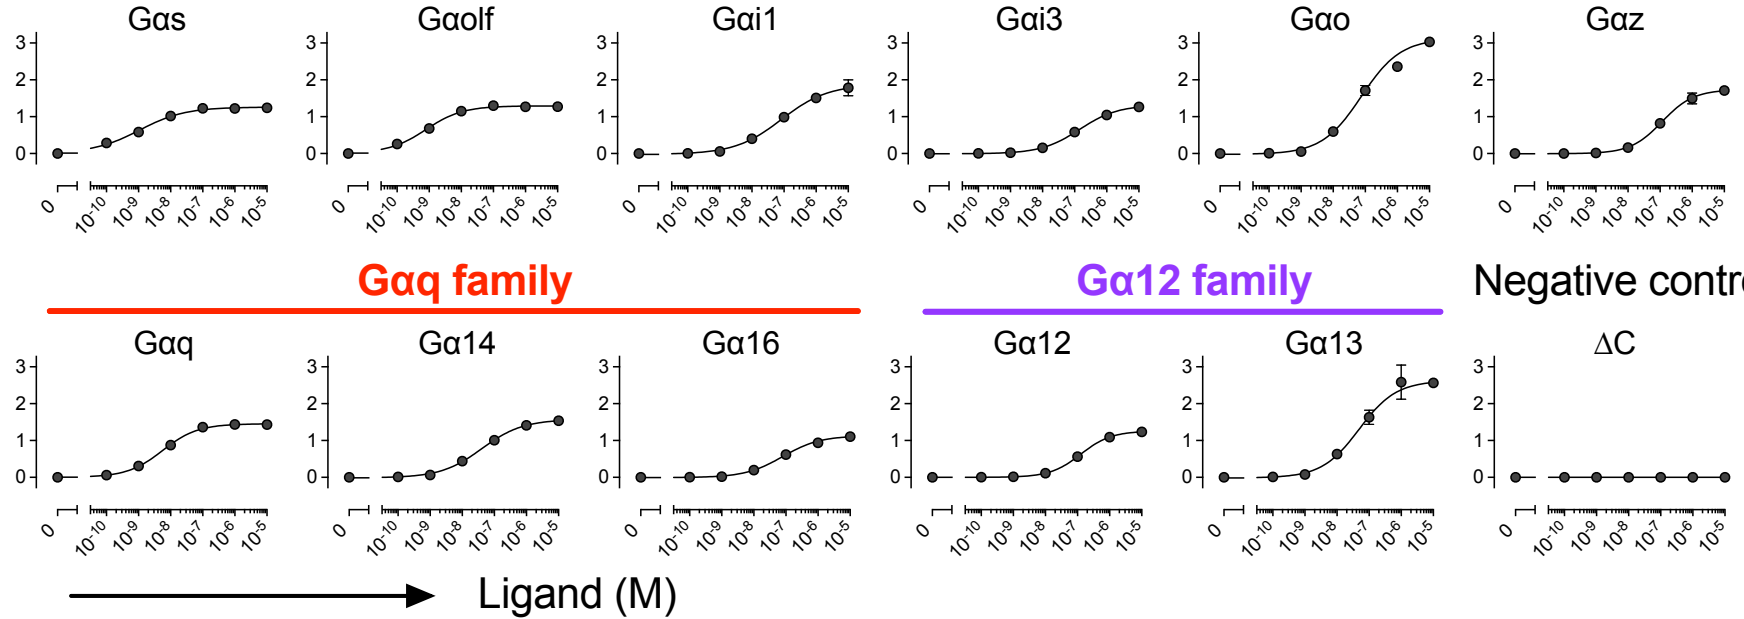

$E_{max}$  (relative to FSK)

● <0.1   ● <0.3   ● <0.5   ● >0.5

Log RAI

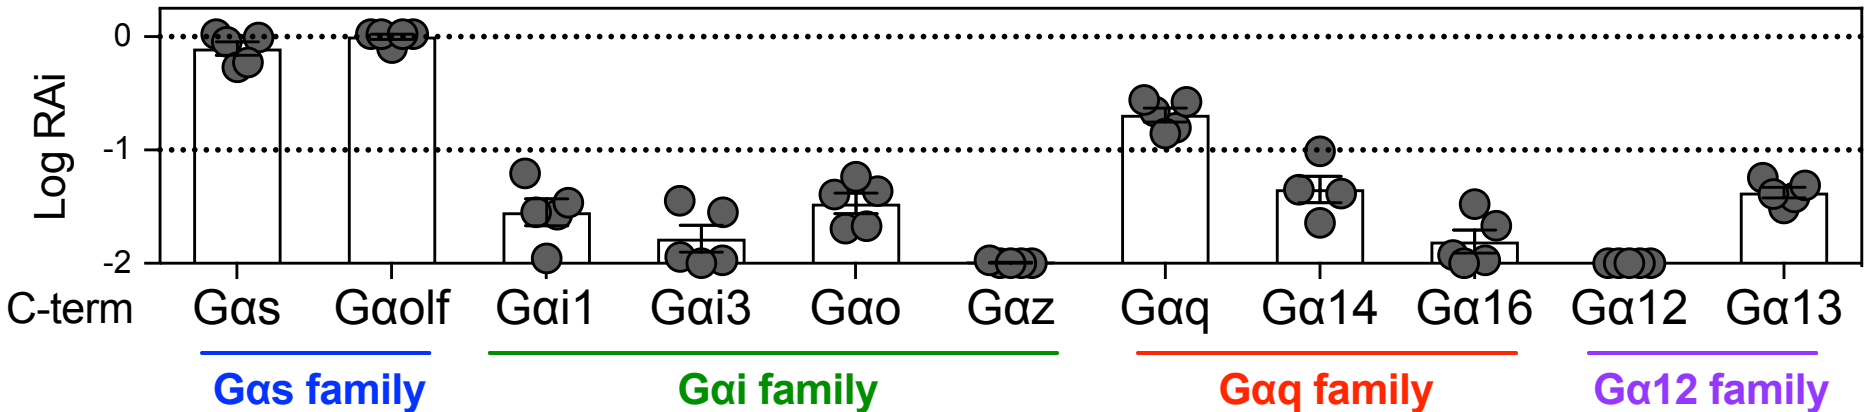

GPCR gene symbol: *PTGER1*  
 GPCR name: EP1  
 Tested ligand: Prostaglandin E2

### C-terminal chimera co-expression

#### Gas family

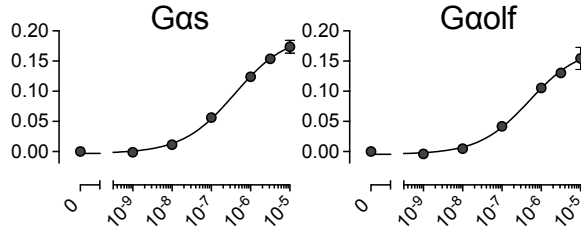

#### Gai family

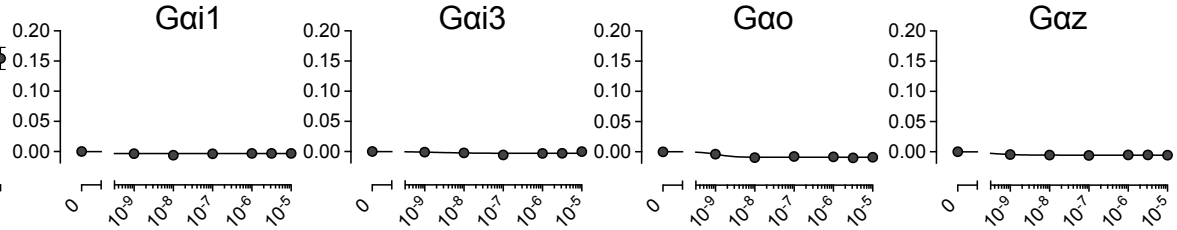

#### Gaq family

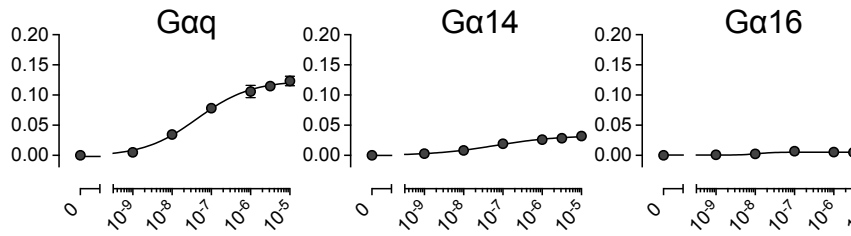

#### Gα12 family

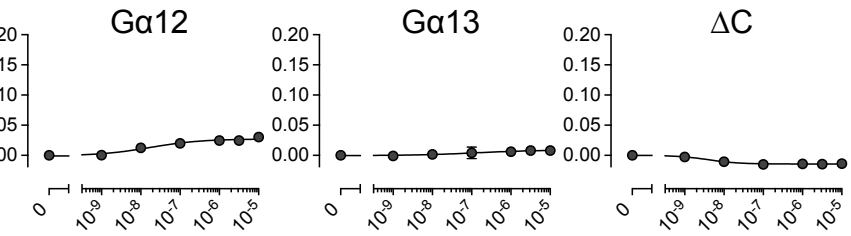

#### Negative control

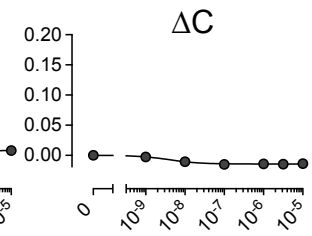

cAMP response  
(normalized to FSK)

Ligand (M)

$E_{max}$  (relative to FSK)

● <0.1   ● <0.3   ● <0.5   ● >0.5

Log RAI

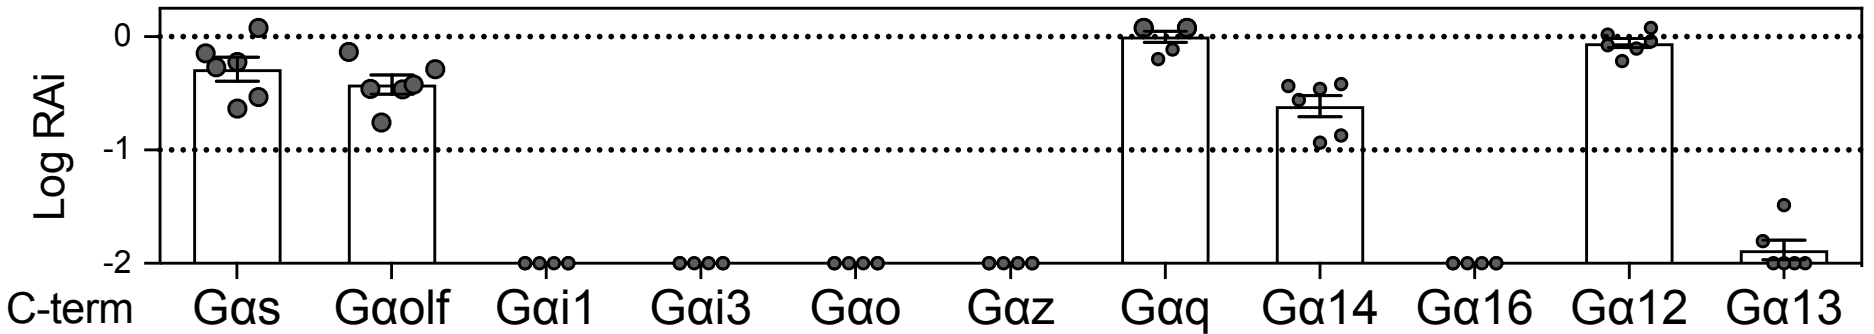

C-term   Gas   Gaolf   Gai1   Gai3   Gao   Gaz   Gaq   Ga14   Ga16   Ga12   Ga13

Gas family

Gai family

Gaq family

Gα12 family

GPCR gene symbol: *PTGER2*

GPCR name: EP2

Tested ligand: Prostaglandin E2

### C-terminal chimera co-expression

#### Gas family

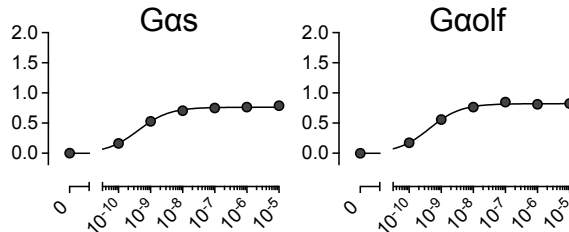

#### Gai family

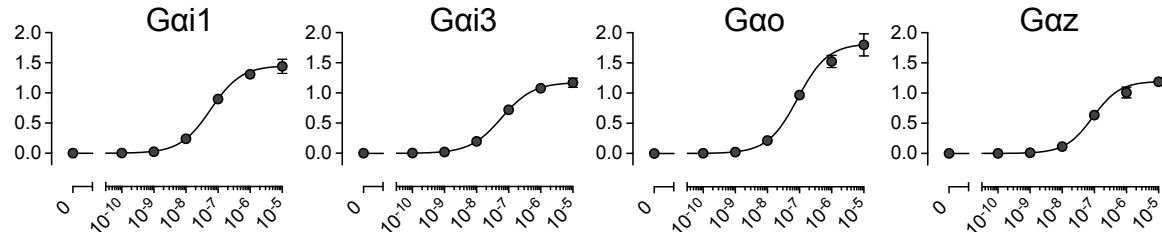

#### Gaq family

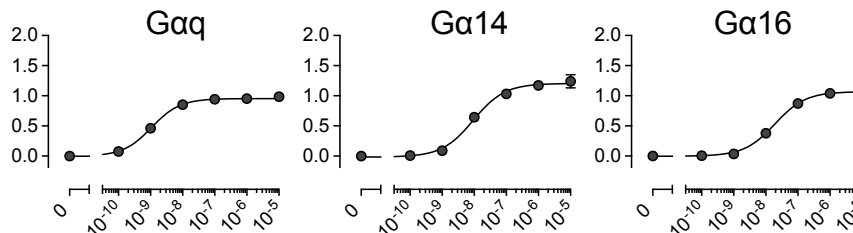

#### Gα12 family

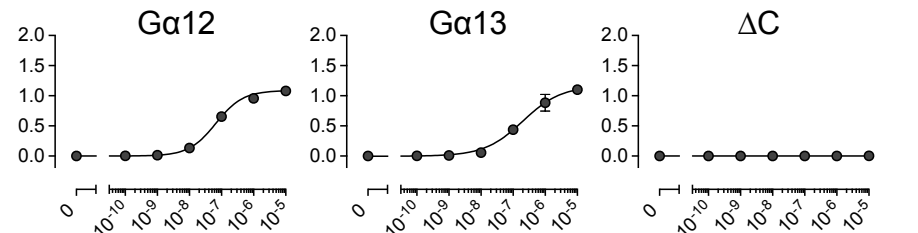

#### Negative control

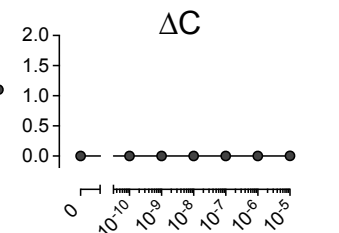

→ Ligand (M)

$E_{max}$  (relative to FSK)

● <0.1   ● <0.3   ● <0.5   ● >0.5

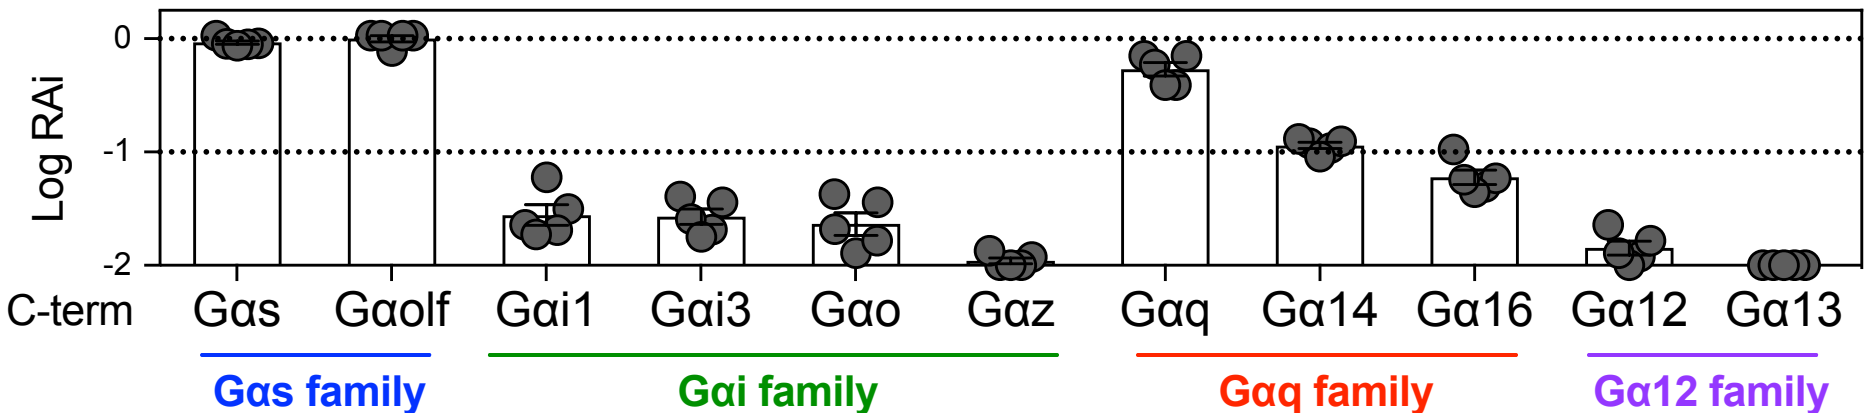

GPCR gene symbol: *PTGER3*

GPCR name: EP3

Tested ligand: Prostaglandin E2

### C-terminal chimera co-expression

#### Gas family

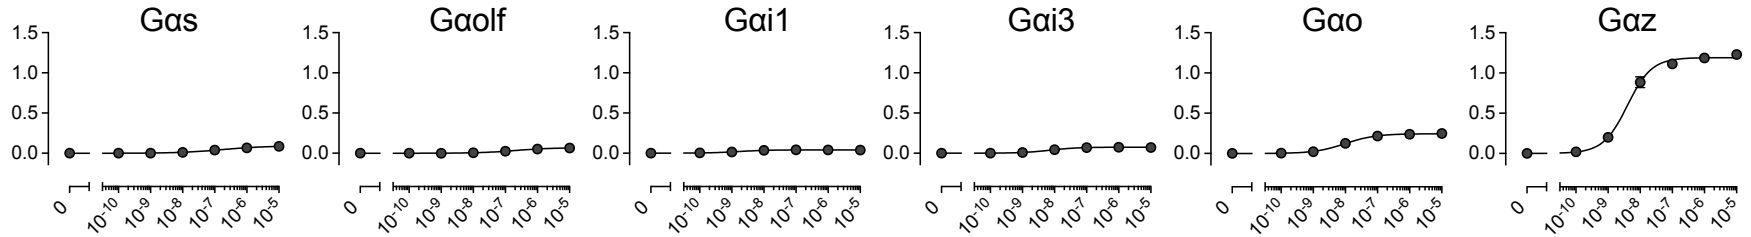

#### Gai family

#### Gaq family

#### Gα12 family

#### Negative control

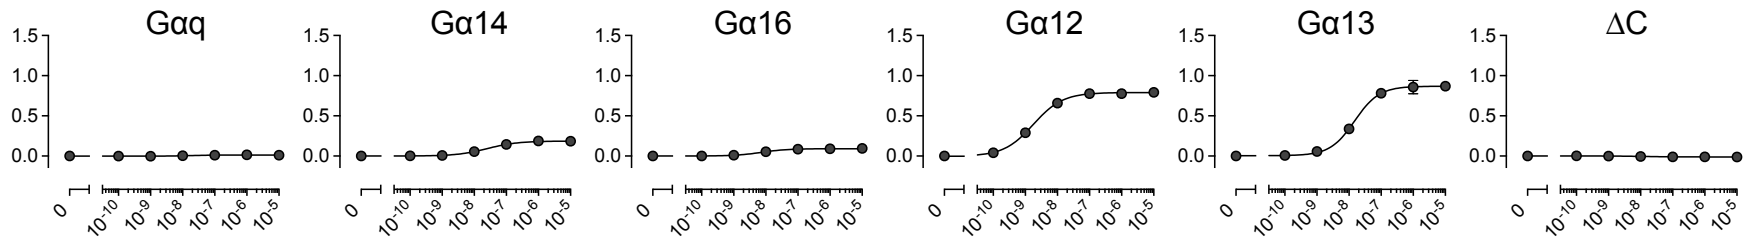

Ligand (M)

$E_{max}$  (relative to FSK)

● <0.1   ● <0.3   ● <0.5   ● >0.5

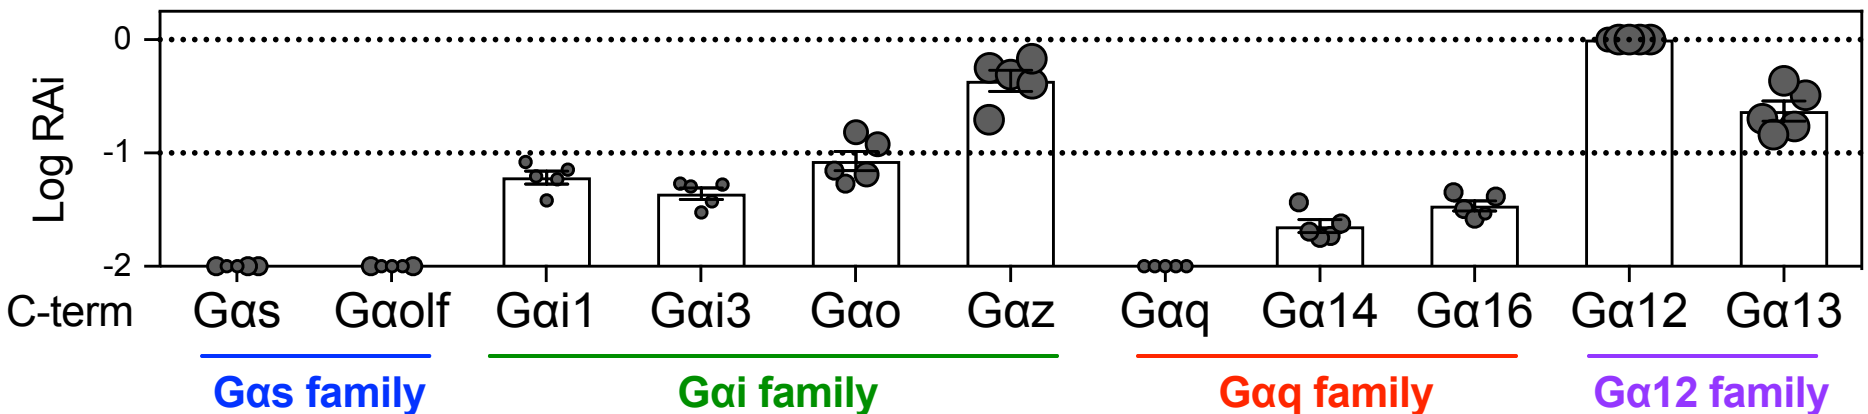

GPCR gene symbol: *PTGER4*

GPCR name: EP4

Tested ligand: Prostaglandin E2

### C-terminal chimera co-expression

#### Gas family

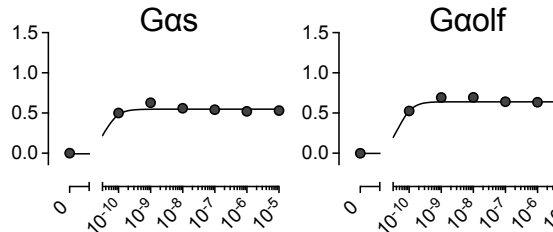

#### Gai family

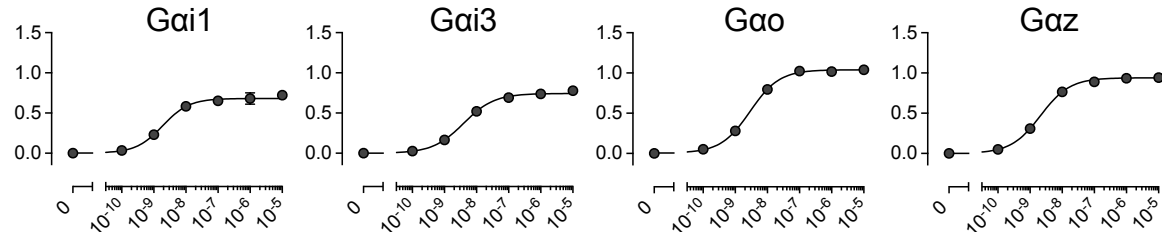

#### Gaq family

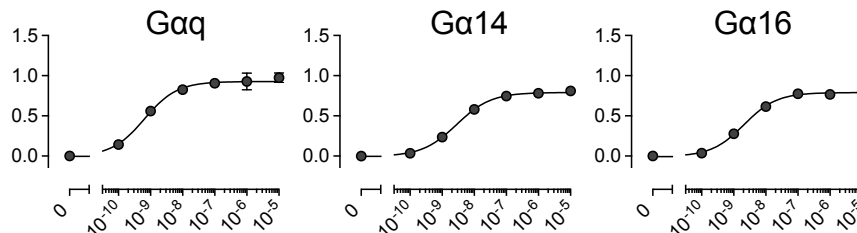

#### Gα12 family

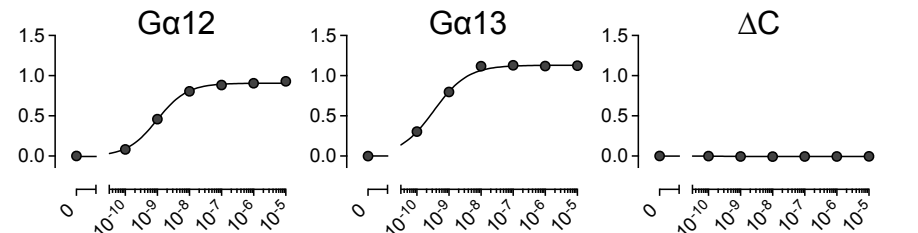

#### Negative control

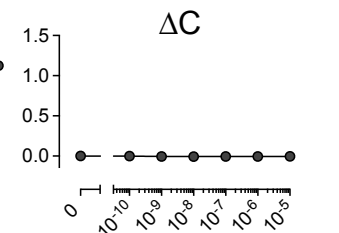

Ligand (M)

$E_{max}$  (relative to FSK)

● <0.1   ● <0.3   ● <0.5   ● >0.5

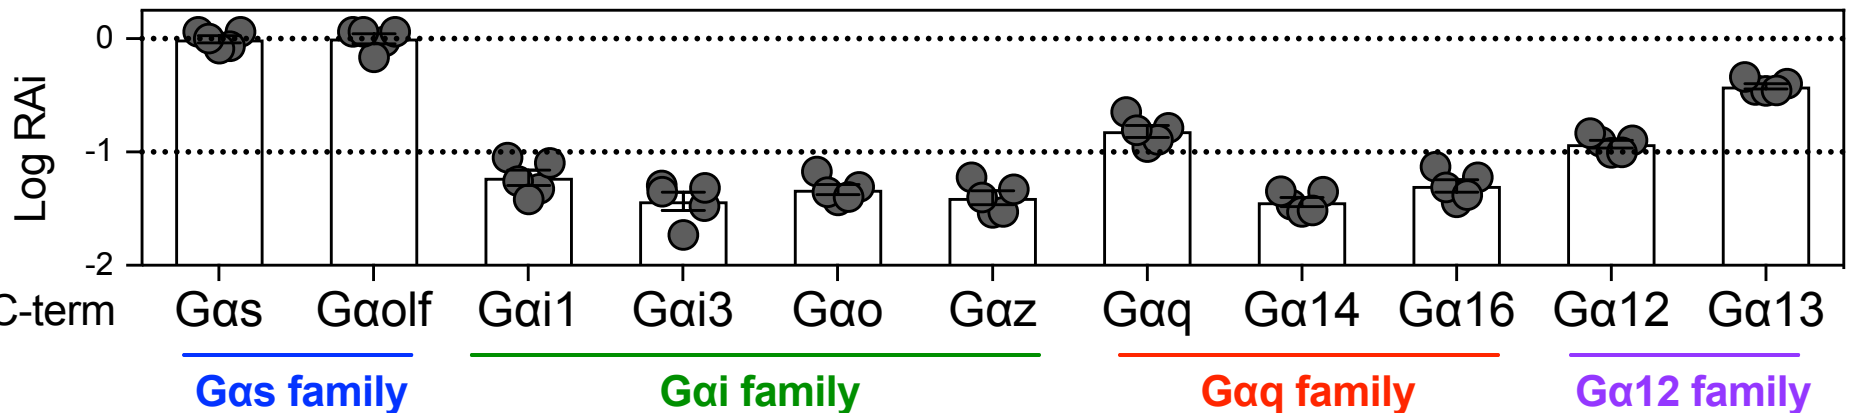

GPCR gene symbol: *PTGIR*

GPCR name: IP

Tested ligand: Iloprost

### C-terminal chimera co-expression

#### Gas family

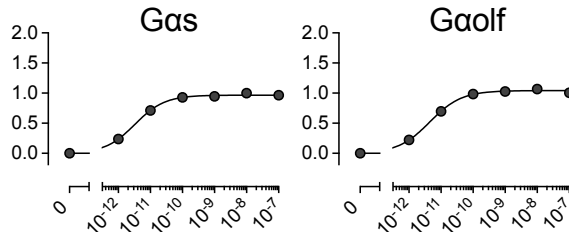

#### Gai family

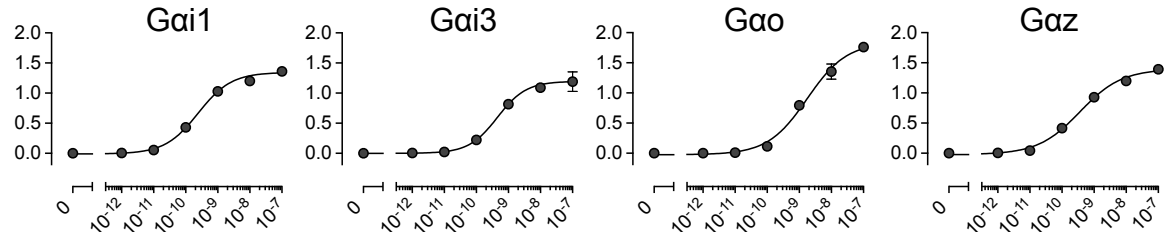

#### Gaq family

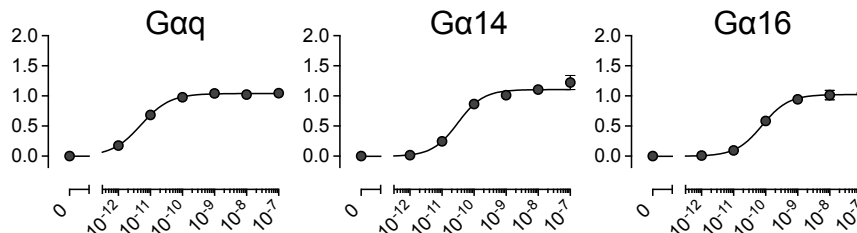

#### Gα12 family

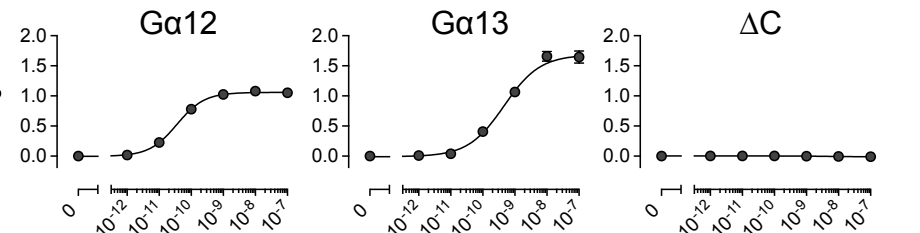

#### Negative control

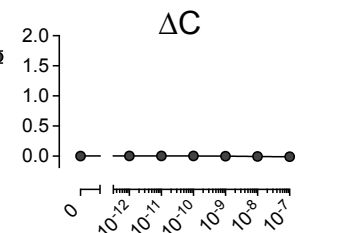

→ Ligand (M)

$E_{max}$  (relative to FSK)

● <0.1   ● <0.3   ● <0.5   ● >0.5

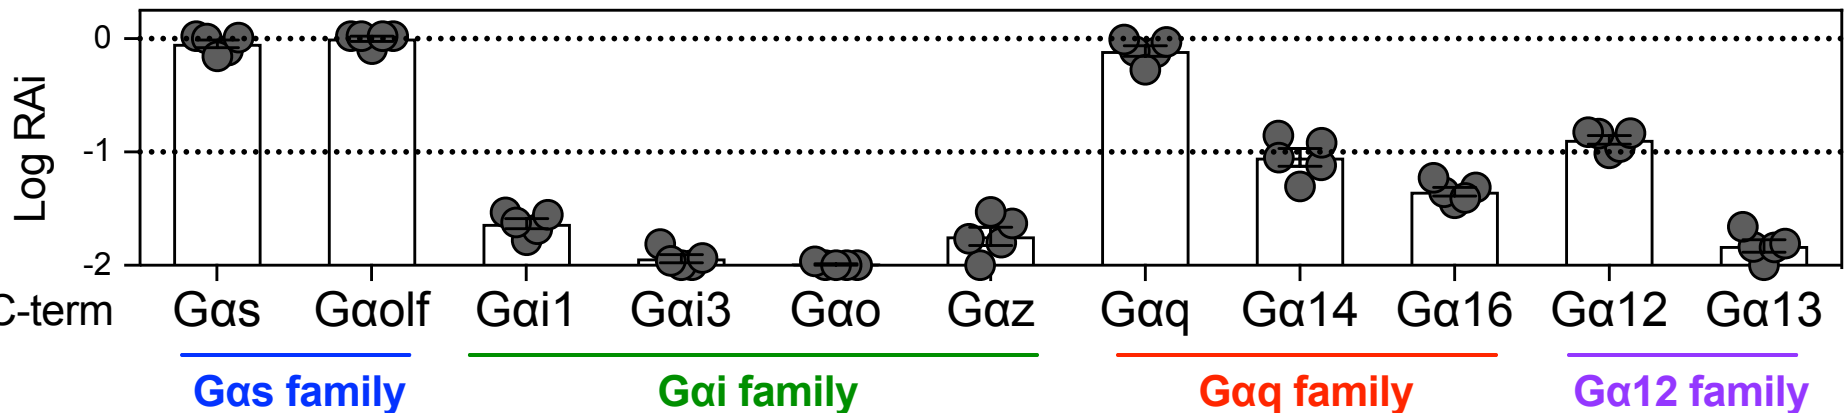

GPCR gene symbol: *TBXA2R*

GPCR name: TP

Tested ligand: U-46619

### C-terminal chimera co-expression

#### Gas family

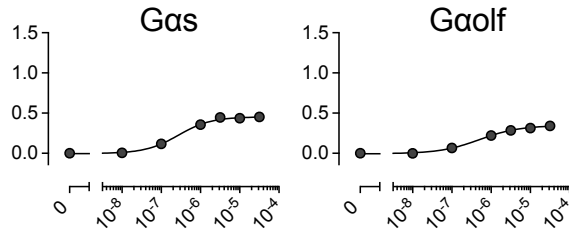

#### Gai family

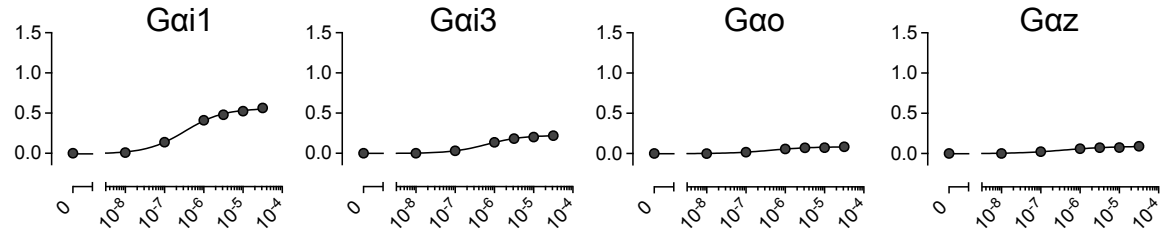

#### Gaq family

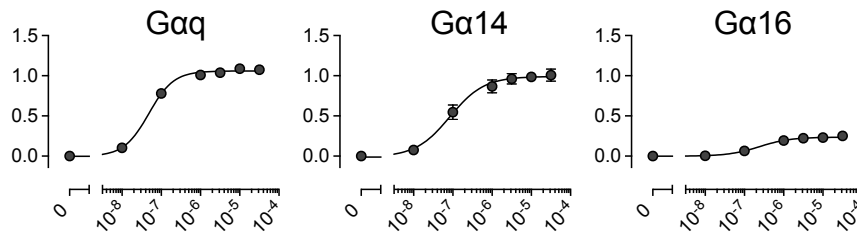

#### Gα12 family

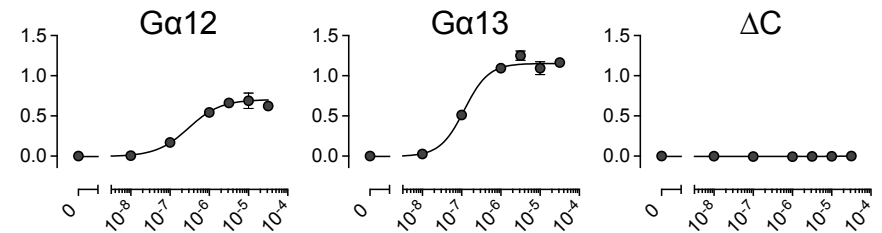

#### Negative control

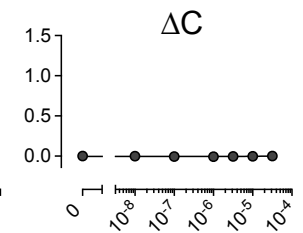

→ Ligand (M)

$E_{max}$  (relative to FSK)

● <0.1   ● <0.3   ● <0.5   ● >0.5

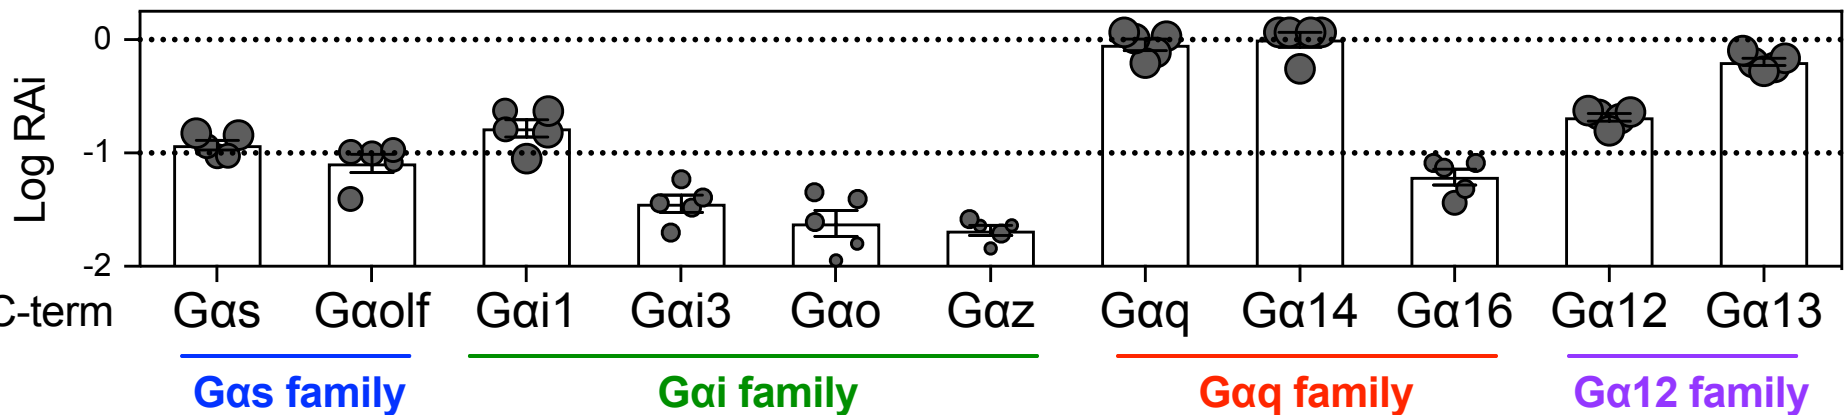

Supplement: NIHMS1044804-supplement-Data_S2.pdf [file NIHMS1044804-supplement-Data_S2.pdf]
